# Supplementary material
Source: publisher figshare collection journal article supplement (https://gsajournals.figshare.com/ndownloader/files/22528517)
Supplement: Supplementary file 1 [file 22528517]

## Sheet: Info
Supplemental Data ##
Differential Expressed Genes for Each DESeq2 Contrasts Performed
B = Beauregard, T = Tanzania, 30DAT = 30 Days after transplanting, 40DAT = 30 Days after transplanting, 50DAT = 30 Days after transplanting, FR = Fibrous Roots, SR = Storage Roots
*T_40DAT_FR_vs_T_40DAT_SR were not included because no DEG were discovered. This is likely do to difficulties in distinguishing between FR and SR at this time point, which may be caused by Tanzania's longer time to maturity

## Sheet: B_30DAT_SR_vs_B_30DAT_FR
Gene	Functional Annotation	Chr	Start	Stop	baseMean	log2FoldChange	lfcSE	stat	pvalue	padj	Trait	QTL_in_Trait_Order
itf00g11930	expansin-like B1	Chr00	20247654	20250809	17.7566	-3.14088	0.691536	-4.37091	1.23731e-05	0.000829411
itf00g16710	F-box family protein	Chr00	27977425	27979294	11.3767	-2.23283	0.577681	-3.73312	0.000189126	0.00485105
itf00g25380	MATE efflux family protein	Chr00	41720581	41723532	204.324	-2.61514	0.750629	-4.13202	3.59585e-05	0.00169122
itf00g26260	alpha/beta-Hydrolases superfamily protein	Chr00	42873072	42876454	21.4972	-2.4973	0.730122	-3.45635	0.000547544	0.00979437
itf00g29170	flowering promoting factor	Chr00	47036798	47037122	77.8048	-3.3956	0.793965	-4.83197	1.35188e-06	0.000191092
itf00g29350	expansin-like B1	Chr00	47369750	47372403	8.08609	-2.82766	0.693932	-3.95847	7.54324e-05	0.00272489
itf00g29810	heat shock protein	Chr00	47718584	47719528	113.28	3.8015	0.717607	5.04894	4.44264e-07	8.31285e-05
itf00g38530	Metallothionein domain containing protein	Chr00	55764935	55765890	533.319	-2.88244	0.535618	-5.44655	5.13573e-08	1.83915e-05
itf00g38960	BEL1-like homeodomain	Chr00	56212865	56214691	22.3992	-3.20584	0.624002	-5.00431	5.60615e-07	9.85206e-05
itf00g49480	FASCICLIN-like arabinogalactan protein 18 precursor	Chr00	69740062	69741424	59.2064	-2.65301	0.528784	-5.01104	5.41366e-07	9.71849e-05
itf00g51910	conserved hypothetical protein	Chr00	72745918	72746191	49.3137	-3.22436	0.708647	-4.68627	2.78224e-06	0.000315997
itf00g58350	Bifunctional inhibitor/lipid-transfer protein/seed storage 2S albumin superfamily protein	Chr00	81140052	81140793	5.69999	-2.95354	0.717271	-3.73712	0.00018614	0.00480431
itf01g00250	Uridine diphosphate glycosyltransferase 74E2	Chr01	148969	150616	138.327	-2.36816	0.582182	-4.0947	4.22715e-05	0.00188907
itf01g00470	basic helix-loop-helix (bHLH) DNA-binding superfamily protein	Chr01	226612	228028	47.7289	2.23311	0.643895	3.45408	0.00055218	0.00981657
itf01g01210	CAP (Cysteine-rich secretory proteins, Antigen 5, and Pathogenesis-related 1 protein) superfamily protein	Chr01	702420	703271	17.6231	-2.70964	0.609734	-4.34711	1.37943e-05	0.000870752
itf01g01520	AGAMOUS-like	Chr01	888212	895158	180.434	-2.39815	0.780529	-5.39481	6.85951e-08	2.29184e-05
itf01g01830	kunitz trypsin inhibitor	Chr01	1045869	1046754	345.631	2.80985	0.658899	4.38709	1.14875e-05	0.000783401
itf01g01850	kunitz trypsin inhibitor	Chr01	1064339	1065218	17.5846	2.38209	0.691698	3.46305	0.000534083	0.00969015
itf01g01860	kunitz trypsin inhibitor	Chr01	1076454	1077369	178016	2.78843	0.664933	4.23017	2.33518e-05	0.00122698
itf01g01870	Kunitz family trypsin and protease inhibitor protein	Chr01	1087689	1090527	81851.3	3.21263	0.679177	4.84763	1.24943e-06	0.000180536
itf01g01890	kunitz trypsin inhibitor	Chr01	1102939	1103996	125842	3.07804	0.678064	4.60467	4.13126e-06	0.000411685
itf01g02620	Lactoylglutathione lyase / glyoxalase I family protein	Chr01	1568369	1570234	126.58	2.74209	0.47265	5.77781	7.5678e-09	4.37402e-06
itf01g03040	Bifunctional inhibitor/lipid-transfer protein/seed storage 2S albumin superfamily protein	Chr01	1832315	1833845	47.9354	2.80193	0.733429	3.86923	0.00010918	0.00349925
itf01g03300	hypothetical protein	Chr01	1952339	1954040	1674.8	2.69713	0.474202	5.71922	1.07016e-08	5.45763e-06
itf01g03570	beta-glucosidase	Chr01	2160199	2164632	164.501	2.49238	0.585753	4.3174	1.57881e-05	0.00094182
itf01g03580	beta-glucosidase	Chr01	2167688	2172403	190.859	2.7099	0.564338	4.9158	8.84226e-07	0.000138541
itf01g03850	cysteine-rich RLK (RECEPTOR-like protein kinase)	Chr01	2427660	2431223	50.2763	2.75722	0.680848	3.84366	0.000121211	0.00368723
itf01g04580	Late embryogenesis abundant (LEA) protein-related	Chr01	2922756	2924394	16.4837	-2.34555	0.661007	-3.50092	0.000463653	0.00879342
itf01g04870	allantoinase	Chr01	3155788	3162119	80.0122	-2.95666	0.650301	-4.57657	4.72664e-06	0.000446278
itf01g05730	Homeodomain-like superfamily protein	Chr01	3908736	3914380	78.6759	-3.46103	0.652523	-5.34655	8.96444e-08	2.87847e-05
itf01g06200	Leucine-rich repeat transmembrane protein kinase	Chr01	4331355	4334496	86.9095	2.19756	0.551972	4.01668	5.90229e-05	0.00234013
itf01g06380	Leucine-rich repeat transmembrane protein kinase	Chr01	4522004	4529433	231.998	2.07296	0.440161	4.72461	2.30554e-06	0.000280209
itf01g07700	Integrase-type DNA-binding superfamily protein	Chr01	6174238	6175289	7.88435	2.73179	0.724825	3.52228	0.000427846	0.00831056
itf01g16400	Ankyrin repeat family protein	Chr01	17590551	17594832	30.1249	-2.95421	0.696247	-4.18969	2.79338e-05	0.00139449	NONC	1
itf01g17670	nicotianamine synthase	Chr01	19019282	19020104	10.8412	-2.8388	0.781928	-3.97002	7.18672e-05	0.00263638	NONC	1
itf01g18860	ankyrin	Chr01	20000447	20003786	12.5932	-2.48591	0.664204	-3.62748	0.000286204	0.0064505	NONC_NCYTHA	1_1
itf01g20890	glucan synthase-like	Chr01	21925256	21941056	586.315	-2.03782	0.343049	-5.93943	2.86019e-09	2.25426e-06	NONC_NCYTHA_TNR	1_1_1
itf01g21000	Protein of unknown function (DUF_B2219) domain containing protein	Chr01	22032159	22034787	487.132	2.41119	0.631736	3.88311	0.00010313	0.00337029	NONC_NCYTHA_TNR	1_1_1
itf01g23000	DUF4228 domain containing protein	Chr01	23554434	23555298	5.39075	-2.18618	0.553283	-3.75486	0.000173442	0.00458041
itf01g24080	homeobox from Arabidopsis thaliana	Chr01	24413730	24416563	304.657	2.07224	0.447548	4.62318	3.77907e-06	0.000383637
itf01g25610	homeobox protein	Chr01	25424600	25425968	6.52638	3.00229	0.744618	3.68079	0.000232512	0.00560983
itf01g26100	Remorin family protein	Chr01	25763331	25764983	40.6029	-2.29456	0.52759	-4.34559	1.38904e-05	0.000872645
itf01g27860	UDP-glucosyl transferase 71B6	Chr01	26913730	26915367	93.7283	-2.00491	0.476852	-4.19294	2.75365e-05	0.00137995
itf01g29470	2-oxoglutarate (2OG) and Fe(II)-dependent oxygenase superfamily protein	Chr01	27986286	27987925	102.508	2.61655	0.513138	5.13396	2.83711e-07	6.20087e-05
itf01g29930	alcohol dehydrogenase	Chr01	28403241	28405460	4048.06	2.24807	0.682148	3.66728	0.000245145	0.0058175
itf01g29950	Glycolipid transfer protein (GLTP) family protein	Chr01	28412856	28414639	192.891	-2.10837	0.563202	-3.74762	0.00017852	0.00466647
itf01g29970	pathogenesis-related family protein	Chr01	28418794	28420062	59.153	-2.21116	0.655384	-3.53777	0.00040352	0.00798718
itf01g30010	Plant stearoyl-acyl-carrier-protein desaturase family protein	Chr01	28442189	28443772	934.784	2.71149	0.585975	4.67603	2.92481e-06	0.000327894
itf01g30030	alcohol dehydrogenase	Chr01	28448635	28450670	3200.57	2.19923	0.649823	3.60485	0.000312334	0.00680671
itf01g30180	nodulin MtN21 /EamA-like transporter family protein	Chr01	28567627	28570062	39.7476	2.28638	0.70062	3.52735	0.000419735	0.00821436
itf01g30430	cellulose synthase A2	Chr01	28832794	28840568	887.416	2.10342	0.548033	3.89917	9.65219e-05	0.00321028
itf01g30700	Leucine-rich receptor-like protein kinase family protein	Chr01	29027055	29030971	20.5008	2.08433	0.577419	3.56624	0.00036214	0.0074563
itf01g30840	Laccase/Diphenol oxidase family protein	Chr01	29096943	29099760	17.4965	-2.92105	0.791218	-4.07321	4.63687e-05	0.00199969
itf01g30850	Laccase/Diphenol oxidase family protein	Chr01	29105012	29107271	19.4477	-2.60038	0.746118	-4.15079	3.31327e-05	0.00159564
itf01g31560	homeobox protein	Chr01	29549863	29551322	278.009	2.26447	0.50239	4.50632	6.59631e-06	0.00055343
itf01g31930	purine permease	Chr01	29735859	29737952	95.0935	-2.20341	0.417501	-5.25978	1.44225e-07	4.03349e-05
itf01g32190	K-box region and MADS-box transcription factor family protein	Chr01	29925068	29934286	9.95303	3.76216	0.780375	4.32899	1.49792e-05	0.000914538
itf01g32660	MATE efflux family protein	Chr01	30238930	30240658	71.8146	-2.90118	0.476643	-6.06854	1.29074e-09	1.36412e-06
itf01g32840	KNOTTED-like from Arabidopsis thaliana	Chr01	30359538	30365374	758.386	2.68106	0.581633	4.66733	3.05139e-06	0.000333401
itf01g32870	S-locus lectin protein kinase family protein	Chr01	30387755	30390883	40.5796	3.11615	0.670462	4.64801	3.35158e-06	0.00035292
itf01g33100	ZCF37	Chr01	30547341	30548266	59.9403	-2.54379	0.512459	-4.96366	6.91767e-07	0.000113875
itf01g33540	WUSCHEL related homeobox	Chr01	30772327	30773630	208.845	2.35794	0.546372	4.30605	1.66195e-05	0.000976552
itf01g33890	serine carboxypeptidase-like	Chr01	30973474	30975588	10.0032	-2.9275	0.753935	-3.665	0.000247335	0.00585877
itf01g34840	Bifunctional inhibitor/lipid-transfer protein/seed storage 2S albumin superfamily protein	Chr01	31447870	31449890	25.7596	-2.14571	0.496795	-4.28683	1.81242e-05	0.00103831
itf01g35340	SNARE-like superfamily protein	Chr01	31722547	31724232	11.7099	2.51426	0.623341	3.77651	0.000159039	0.00436334
itf01g35600	poly(ADP-ribose) polymerase	Chr01	31849764	31855883	95.0072	-2.02024	0.442787	-4.55737	5.1797e-06	0.000472698
itf01g35660	Protein kinase superfamily protein	Chr01	31881409	31883471	241.917	-2.62598	0.454769	-5.77817	7.55156e-09	4.37402e-06
itf01g35740	Protein of unknown function (DUF1218)	Chr01	31929699	31931129	16.3653	-2.19315	0.471662	-4.57585	4.743e-06	0.000446278
itf02g00530	beta HLH protein	Chr02	770748	774955	12.5665	2.1611	0.508968	4.16037	3.17732e-05	0.00154509
itf02g01110	BR enhanced expression	Chr02	1593289	1595344	103.909	2.31569	0.602026	3.78394	0.000154367	0.004316
itf02g03320	glucan endo-1,3-beta-glucosidase-like protein	Chr02	4268241	4273761	76.6786	2.26585	0.616614	3.77205	0.000161913	0.00440041	NOCR	2
itf02g03710	expansin A15	Chr02	4714466	4716434	5.09689	-3.26679	0.692282	-4.19521	2.72623e-05	0.00136885	NOCR	2
itf02g03900	atypical CYS HIS rich thioredoxin	Chr02	4878998	4881055	83.9426	2.38233	0.605507	3.93728	8.24105e-05	0.00288093	NOCR	2
itf02g04770	homolog of Medicago truncatula MTN3	Chr02	5937856	5939964	1916.16	-2.34206	0.457401	-5.1134	3.16411e-07	6.68593e-05	NOCR	2
itf02g04900	sucrose synthase	Chr02	6055941	6060284	148.164	-2.01103	0.433559	-4.63591	3.55379e-06	0.000366788	NOCR	2
itf02g05230	Trypsin and protease inhibitor domain containing protein	Chr02	6182492	6183474	35.1646	-2.48149	0.472604	-5.17131	2.32457e-07	5.39836e-05	NOCR	2
itf02g05250	Kunitz family trypsin and protease inhibitor protein	Chr02	6187786	6188716	59.6652	2.51196	0.781825	3.80585	0.00014132	0.00404355	NOCR	2
itf02g05800	hexokinase	Chr02	6444838	6448057	115.308	-2.0021	0.40733	-4.92171	8.57902e-07	0.000136891	NOCR	2
itf02g06130	phospholipase D alpha	Chr02	6594249	6603590	97.1722	2.71264	0.468988	5.78353	7.31497e-09	4.37402e-06	NOCR	2
itf02g07230	Plant invertase/pectin methylesterase inhibitor superfamily	Chr02	7285846	7288389	40.2184	2.1525	0.541133	3.97111	7.15389e-05	0.00263466	NOCR	2
itf02g07950	Protein of unknown function (DUF581)	Chr02	7658987	7660134	46.0881	2.17199	0.617835	3.56994	0.000357065	0.00741173	NOCR	2
itf02g09350	F-box family protein	Chr02	8452122	8455766	109.149	-2.14579	0.387846	-5.52983	3.20533e-08	1.30262e-05	NOCR	2
itf02g09710	HXXXD-type acyl-transferase family protein	Chr02	8660282	8663836	98.3311	2.08886	0.55799	3.73228	0.000189756	0.00485454	NOCR	2
itf02g09800	Bifunctional inhibitor/lipid-transfer protein/seed storage 2S albumin superfamily protein	Chr02	8716765	8717983	1060.92	2.60904	0.58098	4.69407	2.67817e-06	0.000309584	NOCR	2
itf02g11070	cellulose synthase-like B	Chr02	9493620	9497303	356.887	-2.33925	0.539051	-4.37839	1.19559e-05	0.000807692	NOCR	2
itf02g11520	basic helix-loop-helix (bHLH) DNA-binding superfamily protein	Chr02	9756371	9757907	679.346	-2.4819	0.722427	-4.01091	6.04845e-05	0.00237276	NOCR_NONC	2_1
itf02g12160	hypothetical protein	Chr02	10124914	10125355	4.96446	-2.47702	0.760311	-3.57166	0.000354726	0.00738676	NOCR_NONC	2_1
itf02g12880	O-methyltransferase family protein	Chr02	10561980	10563071	115.433	-2.11119	0.47932	-4.43493	9.21023e-06	0.000676692	NOCR_NONC	2_1
itf02g13050	HXXXD-type acyl-transferase family protein	Chr02	10640042	10642433	24.0622	2.59118	0.602169	4.231	2.32651e-05	0.00122698	NOCR_NONC	2_1
itf02g13190	Protein of unknown function (DUF640)	Chr02	10724307	10727013	34.7071	3.13958	0.726473	4.34963	1.36365e-05	0.000866605	NOCR_NONC	2_1
itf02g15880	NAD(P)-binding Rossmann-fold superfamily protein	Chr02	12678485	12680972	31.6603	-2.24492	0.456308	-4.87353	1.09622e-06	0.000163859
itf02g16130	thiazole biosynthetic enzyme, chloroplast (ARA6) (THI1) (THI4)	Chr02	12823586	12825593	828.61	2.29263	0.613634	3.71674	0.000201807	0.0050762
itf02g17970	nitrate transmembrane transporters	Chr02	14108412	14110327	151.491	-2.79688	0.704945	-4.36071	1.29639e-05	0.000837717
itf02g17990	nitrate transmembrane transporters	Chr02	14119864	14121071	45.3882	-2.64138	0.722134	-3.85723	0.000114678	0.00357205
itf02g18590	conserved hypothetical protein	Chr02	14699375	14705530	95.9658	-2.25793	0.547089	-4.19902	2.68074e-05	0.00135591
itf02g18640	HCO3- transporter family	Chr02	14739035	14745196	746.653	-2.12032	0.525816	-4.07464	4.60847e-05	0.00199969
itf02g19860	2-oxoglutarate (2OG) and Fe(II)-dependent oxygenase superfamily protein	Chr02	15901607	15901976	21.5336	-2.16107	0.592352	-3.64286	0.000269627	0.00620046
itf02g19870	2-oxoglutarate (2OG) and Fe(II)-dependent oxygenase superfamily protein	Chr02	15905384	15906854	34.0111	-2.85981	0.630795	-4.54434	5.51079e-06	0.000487353
itf02g21760	Galactose mutarotase-like superfamily protein	Chr02	18596182	18598093	128.437	2.1344	0.510036	4.15935	3.19149e-05	0.00154576
itf02g25360	adenine phosphoribosyltransferase	Chr02	23495851	23498420	76.9066	2.24397	0.670189	3.66739	0.000245044	0.0058175
itf02g26430	2-oxoglutarate (2OG) and Fe(II)-dependent oxygenase superfamily protein	Chr02	24375812	24379373	147.413	-2.70359	0.797532	-4.3558	1.32584e-05	0.000849356
itf02g26440	2-oxoglutarate (2OG) and Fe(II)-dependent oxygenase superfamily protein	Chr02	24391159	24393072	723.03	-3.71084	0.769984	-5.63542	1.74627e-08	7.69811e-06
itf03g01090	Major facilitator superfamily protein	Chr03	478135	481627	378.233	-2.43126	0.450378	-5.39446	6.87314e-08	2.29184e-05	NONC_NOCR	2_3
itf03g01490	Bifunctional inhibitor/lipid-transfer protein/seed storage 2S albumin superfamily protein	Chr03	695939	696477	5.47481	-2.85425	0.749091	-3.49418	0.000475514	0.00894908	NONC_NOCR	2_3
itf03g01860	alpha/beta-Hydrolases superfamily protein	Chr03	898336	901993	44.6238	2.48031	0.705628	3.65369	0.000258499	0.00600831	NONC_NOCR	2_3
itf03g02100	Malectin/receptor-like protein kinase family protein	Chr03	1025517	1030851	30.9787	2.88986	0.541832	5.24384	1.57272e-07	4.30577e-05	NONC_NOCR	2_3
itf03g02620	hypothetical protein	Chr03	1327058	1327875	21.8886	2.06976	0.450557	4.54403	5.51876e-06	0.000487353	NONC_NOCR	2_3
itf03g02770	cold-regulated 413-plasma membrane	Chr03	1423593	1426231	79.8867	2.61827	0.542332	4.84256	1.28177e-06	0.000184186	NONC_NOCR	2_3
itf03g04380	geranylgeranyl pyrophosphate synthase	Chr03	2492498	2493813	31.5531	-2.36292	0.667257	-3.5162	0.000437764	0.00846528	NOCR	3
itf03g05100	sucrose synthase	Chr03	3101580	3105775	175.361	-2.01997	0.449455	-4.48868	7.16656e-06	0.000571764	NOCR	3
itf03g05160	polyamine oxidase	Chr03	3170467	3176375	447.765	2.07839	0.48738	4.25197	2.11899e-05	0.0011458	NOCR	3
itf03g05950	Disease resistance-responsive (dirigent-like protein) family protein	Chr03	3831382	3831919	260.348	-2.15475	0.47037	-4.5782	4.69e-06	0.000446278
itf03g06120	Calcium-dependent phosphotriesterase superfamily protein	Chr03	3973340	3976247	176.519	-2.18665	0.50288	-4.32529	1.52333e-05	0.000923553
itf03g06130	Calcium-dependent phosphotriesterase superfamily protein	Chr03	3978089	3978540	4.70525	-2.12074	0.578002	-3.47711	0.000506842	0.00935885
itf03g06140	Calcium-dependent phosphotriesterase superfamily protein	Chr03	3978976	3979697	10.1674	-2.00579	0.44472	-4.40179	1.0736e-05	0.000746612
itf03g06800	Major facilitator superfamily protein	Chr03	4350073	4352122	150.014	3.43997	0.707283	5.14686	2.64881e-07	5.93904e-05
itf03g07550	RAD-like	Chr03	4938691	4939639	39.9841	2.23691	0.712232	4.0735	4.63121e-05	0.00199969
itf03g07750	Major facilitator superfamily protein	Chr03	5103805	5105618	29.3204	2.49036	0.730501	3.47961	0.000502147	0.00930724
itf03g08910	xyloglucan endotransglucosylase/hydrolase	Chr03	6027477	6029366	120.411	2.8121	0.701734	4.48188	7.39881e-06	0.000581633
itf03g09690	nodulin MtN21 /EamA-like transporter family protein	Chr03	7130884	7135636	162.716	2.65666	0.409941	6.48078	9.12512e-11	2.15759e-07
itf03g11500	WRKY DNA-binding protein	Chr03	9576005	9579620	467.934	2.03858	0.463874	4.39039	1.13148e-05	0.00077648
itf03g12810	BCL-2-associated athanogene	Chr03	11132490	11134711	518.985	2.03836	0.420163	4.86067	1.1699e-06	0.000172887
itf03g13250	Plant invertase/pectin methylesterase inhibitor superfamily protein	Chr03	11376157	11377164	569.056	2.66799	0.666417	4.07549	4.59177e-05	0.00199969
itf03g13780	glutamate dehydrogenase	Chr03	11671770	11674968	60.451	-2.0371	0.462992	-4.39576	1.10384e-05	0.000761532
itf03g15150	RING/FYVE/PHD zinc finger superfamily protein	Chr03	12489786	12492194	7.14891	2.59263	0.665518	3.47758	0.00050596	0.0093529
itf03g15350	Exostosin family protein	Chr03	12587993	12589329	85.1243	-2.00834	0.489907	-4.07948	4.5136e-05	0.00198291
itf03g15510	LOB domain-containing protein	Chr03	12675533	12676249	49.0178	2.97632	0.649473	4.4471	8.70375e-06	0.000646788
itf03g15770	Heavy metal transport/detoxification superfamily protein	Chr03	12843975	12844813	48.5069	-2.41273	0.602349	-4.04192	5.30146e-05	0.00217485
itf03g16320	PAR1 protein	Chr03	13169653	13170633	85.4211	-2.27432	0.604867	-3.73604	0.000186939	0.0048092
itf03g16500	myb domain protein	Chr03	13275664	13277686	80.7798	2.2266	0.55708	3.95187	7.75413e-05	0.00276186
itf03g17460	cytochrome P450, family 72, subfamily A, polypeptide	Chr03	13839792	13841166	31.7316	-2.85398	0.653975	-4.36476	1.27261e-05	0.00083595
itf03g17470	cytochrome P450, family 72, subfamily A, polypeptide	Chr03	13841392	13842835	76.6952	-2.62666	0.591029	-4.47317	7.7069e-06	0.000596574
itf03g19610	O-Glycosyl hydrolases family 17 protein	Chr03	15397556	15399344	4.98025	-3.3804	0.683193	-4.40685	1.04885e-05	0.000739284
itf03g21040	spermidine hydroxycinnamoyl transferase	Chr03	16672511	16677715	31.6322	3.03339	0.734062	4.11908	3.80391e-05	0.00176987
itf03g21060	Bifunctional inhibitor/lipid-transfer protein/seed storage 2S albumin superfamily protein	Chr03	16681725	16683984	350.04	3.00832	0.710276	4.88137	1.05351e-06	0.000160238
itf03g22310	cycloartenol synthase	Chr03	17787134	17796993	144.942	-2.39443	0.760473	-3.57358	0.000352129	0.00734368
itf03g22450	cinnamate-4-hydroxylase	Chr03	17973945	17975648	249.265	2.30865	0.629883	3.79049	0.000150348	0.004269
itf03g22710	phosphatidyl inositol monophosphate 5 kinase	Chr03	18279331	18282399	15.0423	2.20249	0.600708	3.61328	0.000302348	0.0066946
itf03g23640	Leucine-rich receptor-like protein kinase family protein	Chr03	19227345	19230357	149.332	-3.27314	0.670922	-4.7537	1.99727e-06	0.000248551
itf03g24570	CBS domain-containing protein with a domain of unknown function (DUF21)	Chr03	20196129	20201162	150.541	-3.0298	0.707274	-4.49378	6.99701e-06	0.000563422
itf03g25180	Calcium-binding EF-hand family protein	Chr03	21011510	21015914	71.3401	-2.19344	0.546839	-4.06951	4.71123e-05	0.00201537
itf03g25520	Haloacid dehalogenase-like hydrolase (HAD) superfamily protein	Chr03	21448906	21450697	72.9592	-3.28215	0.697008	-4.81712	1.45644e-06	0.000200079
itf03g26260	hypothetical protein	Chr03	22336786	22337649	243.776	2.4225	0.725399	3.95	7.81517e-05	0.00276946
itf03g26380	Heavy metal transport/detoxification superfamily protein	Chr03	22432664	22435370	180.218	-2.28607	0.488211	-4.68815	2.75682e-06	0.000314483
itf03g28390	hypothetical protein	Chr03	25116219	25130368	30.0558	-2.33267	0.449349	-5.14972	2.60872e-07	5.90002e-05
itf03g29420	cytochrome P450, family 71, subfamily B, polypeptide	Chr03	26420149	26425083	46.8941	-3.4362	0.743328	-4.71898	2.37026e-06	0.000285408
itf03g29930	O-methyltransferase family protein	Chr03	27037811	27039593	27.2044	-2.48998	0.484637	-5.07093	3.95876e-07	7.68384e-05
itf03g30440	Auxin-responsive GH3 family protein	Chr03	27692873	27695003	91.5584	-2.74958	0.769938	-4.70587	2.52781e-06	0.000298844
itf03g30450	Auxin-responsive GH3 family protein	Chr03	27712599	27715022	52.315	-3.08545	0.763695	-5.01489	5.30634e-07	9.65122e-05
itf03g30640	conserved hypothetical protein	Chr03	27854414	27856124	61.6524	-2.59415	0.582488	-4.46961	7.83605e-06	0.000601203
itf03g31080	basic leucine-zipper	Chr03	28159395	28160230	30.6858	-2.20558	0.499752	-4.39591	1.1031e-05	0.000761532
itf04g00390	RING/U-box superfamily protein	Chr04	204126	205626	5.80232	-2.11266	0.583973	-3.45475	0.000550795	0.00981208	FYTHA	1
itf04g00620	conserved hypothetical protein	Chr04	306193	306879	296.28	2.15128	0.57231	3.73674	0.000186423	0.00480543	FYTHA	1
itf04g00780	chitinase A	Chr04	368973	370242	340.828	-3.71006	0.625077	-5.89668	3.70896e-09	2.67962e-06	FYTHA	1
itf04g01110	cysteine synthase C1	Chr04	527298	529507	40.4508	-2.86754	0.645562	-4.35083	1.35623e-05	0.000866605	FYTHA	1
itf04g02700	Lactate/malate dehydrogenase family protein	Chr04	1490788	1493023	37.0293	-2.42144	0.519298	-4.63912	3.49888e-06	0.000365471	FYTHA	1
itf04g03080	WRKY family transcription factor	Chr04	1715697	1720052	115.545	2.0219	0.535531	3.75711	0.000171889	0.00455738	FYTHA	1
itf04g04640	hypothetical protein	Chr04	2608328	2609696	273.215	-2.74978	0.681914	-4.5065	6.59059e-06	0.00055343	FYTHA_TNR_NCYTHA	1_3_2
itf04g05100	Subtilase family protein	Chr04	2865435	2867850	72.0726	2.47318	0.512033	4.78969	1.67042e-06	0.000220493	FYTHA_TNR_NCYTHA	1_3_2
itf04g06440	Seven transmembrane MLO family protein	Chr04	3779749	3784596	123.674	-2.41512	0.582254	-4.14516	3.39575e-05	0.00162055	FYTHA_TNR_NCYTHA_NONC_NOCR	1_3_2_3_4
itf04g07370	hypothetical protein	Chr04	4497196	4497944	4.09321	-2.21453	0.560395	-3.71571	0.000202634	0.00508718	FYTHA_TNR_NCYTHA_NOCR	1_3_2_4
itf04g07560	zinc knuckle (CCHC-type) family protein	Chr04	4652840	4658972	33.0752	2.10224	0.554796	3.78523	0.000153566	0.004316	FYTHA_TNR_NCYTHA_NOCR	1_3_2_4
itf04g08090	Protein of unknown function (DUF640)	Chr04	5099415	5100603	83.5321	3.48157	0.744879	4.94938	7.44502e-07	0.000121023	FYTHA_TNR_NCYTHA_NOCR	1_3_2_4
itf04g08290	Disease resistance protein (CC-NBS-LRR class) family	Chr04	5230864	5234409	121.55	-2.11432	0.548235	-3.9007	9.59136e-05	0.00319413	FYTHA_TNR_NCYTHA_NOCR	1_3_2_4
itf04g08350	peptide transporter	Chr04	5283293	5290174	153.095	-2.29952	0.495872	-4.68425	2.80993e-06	0.000317755	FYTHA_TNR_NCYTHA_NOCR	1_3_2_4
itf04g08490	TLD-domain containing nucleolar protein	Chr04	5386158	5390282	32.2832	2.08407	0.541716	3.85761	0.000114501	0.00357205	FYTHA_TNR_NCYTHA_NOCR	1_3_2_4
itf04g09810	Glycosyl hydrolase superfamily protein	Chr04	6678951	6681239	161.107	-3.55667	0.689606	-5.10338	3.33636e-07	6.77932e-05	FYTHA_NCYTHA_NOCR	1_2_4
itf04g11470	Protein kinase superfamily protein	Chr04	8467261	8474378	124.721	3.54426	0.661058	5.54062	3.01408e-08	1.24434e-05	FYTHA_NCYTHA	1_2
itf04g12060	Glycosyl hydrolase superfamily protein	Chr04	9133177	9135916	249.638	-3.54202	0.672985	-5.1942	2.05606e-07	5.09297e-05	FYTHA_NCYTHA	1_2
itf04g13040	Reticulon family protein	Chr04	10338510	10341213	46.1033	-2.08078	0.485446	-4.26969	1.95748e-05	0.00107409	FYTHA_NCYTHA	1_2
itf04g13720	RGA-like	Chr04	11204541	11206113	18.5368	-2.94179	0.689624	-4.10966	3.96237e-05	0.00182402	FYTHA_NCYTHA	1_2
itf04g14740	Bifunctional inhibitor/lipid-transfer protein/seed storage 2S albumin superfamily protein	Chr04	12728161	12729772	144.571	-2.295	0.604568	-3.8895	0.000100451	0.0033155	NCYTHA	2
itf04g15300	MAP kinase	Chr04	13477490	13480824	44.9214	-2.2485	0.60285	-3.78517	0.0001536	0.004316	NCYTHA	2
itf04g15930	Heavy metal transport/detoxification superfamily protein	Chr04	14394388	14396801	597.367	2.38367	0.472359	5.03011	4.90197e-07	9.04223e-05	NCYTHA	2
itf04g16250	Protein phosphatase 2C family protein	Chr04	14990620	14992565	782.327	-2.19281	0.539722	-4.09032	4.30778e-05	0.00191523	NCYTHA	2
itf04g17200	basic helix-loop-helix (bHLH) DNA-binding superfamily protein	Chr04	16449532	16453866	65.1852	-2.52508	0.449763	-5.59304	2.23127e-08	9.67218e-06	NCYTHA	2
itf04g20850	hypothetical protein	Chr04	22186152	22189701	10.6558	-3.07118	0.624484	-4.43529	9.19493e-06	0.000676692	NCYTHA	2
itf04g21590	Potato type II proteinase inhibitor family domain containing protein	Chr04	23248968	23250063	44.8371	-2.46201	0.771799	-4.10417	4.05775e-05	0.0018483	NCYTHA	2
itf04g22200	Protein of unknown function (DUF506)	Chr04	23888728	23893862	36.2444	2.54712	0.652421	3.77399	0.000160656	0.00439272	NCYTHA	2
itf04g23080	Protein of Unknown Function (DUF239)	Chr04	24982330	24985727	1176.3	-2.64699	0.524256	-5.11551	3.12899e-07	6.67065e-05	NCYTHA	2
itf04g23630	NAD(P)-binding Rossmann-fold superfamily protein	Chr04	25393500	25394331	43.8624	2.56237	0.611955	4.23363	2.29947e-05	0.00121806	NCYTHA	2
itf04g23780	WRKY DNA-binding protein	Chr04	25495104	25496224	15.2717	-3.2585	0.633978	-4.84802	1.24701e-06	0.000180536	NCYTHA	2
itf04g23800	RGA-like	Chr04	25502768	25504502	3.90123	-2.92913	0.653834	-3.80647	0.000140964	0.00404227	NCYTHA	2
itf04g25730	C2H2 and C2HC zinc fingers superfamily protein	Chr04	26585701	26589558	49.1512	3.02387	0.689959	4.49585	6.92917e-06	0.000563422	NCYTHA	2
itf04g25970	cytochrome P450, family 94, subfamily B, polypeptide	Chr04	26754348	26756336	80.7542	2.25267	0.676447	3.4558	0.000548671	0.00979437	NCYTHA	2
itf04g26140	2-oxoglutarate (2OG) and Fe(II)-dependent oxygenase superfamily protein	Chr04	26928019	26929309	193.033	-2.93034	0.78476	-4.24731	2.16357e-05	0.00116506	NCYTHA	2
itf04g26230	Protein of unknown function (DUF640)	Chr04	26984419	26985460	103.041	2.73645	0.701649	4.0466	5.19665e-05	0.00214978	NCYTHA	2
itf04g26810	phytochrome interacting factor 3-like	Chr04	27399841	27403233	125.843	2.0059	0.521073	3.86572	0.000110762	0.00351892	NCYTHA	2
itf04g26860	Pectin lyase-like superfamily protein	Chr04	27433729	27437192	5.36296	-2.59791	0.743436	-3.75916	0.000170484	0.00454489	NCYTHA	2
itf04g27850	Phototropic-responsive NPH3 family protein	Chr04	28045451	28048734	14.0791	3.1195	0.668352	4.36614	1.26463e-05	0.00083595	NCYTHA_TNR	2_4
itf04g28360	UDP-Glycosyltransferase superfamily protein	Chr04	28357303	28360411	119.252	-2.12918	0.496518	-4.30733	1.65236e-05	0.000976521	NCYTHA_TNR	2_4
itf04g29380	ZRT/IRT-like protein	Chr04	28975210	28977244	400.806	-3.31541	0.654934	-5.25347	1.49262e-07	4.12996e-05	NCYTHA_TNR	2_4
itf04g29640	cytochrome P450, family 71, subfamily B, polypeptide	Chr04	29142934	29148025	70.1012	-2.42565	0.618368	-4.00187	6.28438e-05	0.00243501	NCYTHA_TNR	2_4
itf04g29900	Fusaric acid resistance protein-like domain containing protein	Chr04	29305407	29308146	5.74977	-2.7533	0.766467	-3.82647	0.000129993	0.0038464	NCYTHA_TNR	2_4
itf04g29910	Fusaric acid resistance protein-like domain containing protein	Chr04	29318629	29321432	106.583	-4.57878	0.650214	-6.85531	7.11598e-12	3.70159e-08	NCYTHA_TNR	2_4
itf04g30900	Kiwellin	Chr04	29960355	29961757	68.3995	3.08057	0.706883	4.27828	1.8834e-05	0.0010542	NCYTHA_TNR	2_4
itf04g31200	xyloglucan endotransglucosylase/hydrolase	Chr04	30129088	30130614	195.364	2.51337	0.457757	5.48227	4.19914e-08	1.56022e-05	NCYTHA_TNR	2_4
itf04g31790	centroradialis	Chr04	30678612	30679772	296.97	-2.3807	0.630522	-3.65882	0.000253384	0.00595163	NCYTHA	2
itf04g31800	AMP-dependent synthetase and ligase family protein	Chr04	30686559	30688810	43.73	-2.94523	0.62059	-4.63616	3.54938e-06	0.000366788	NCYTHA	2
itf04g34340	Peroxidase superfamily protein	Chr04	32364676	32366049	971.555	-4.06046	0.744633	-6.67229	2.51842e-11	8.15773e-08
itf05g01070	K-box region and MADS-box transcription factor family protein	Chr05	874303	876894	20.9043	3.45835	0.66381	4.98437	6.2165e-07	0.00010499
itf05g01600	Potato type II proteinase inhibitor family domain containing protein	Chr05	1323319	1324075	12.9813	-3.00342	0.75814	-4.49787	6.86378e-06	0.000563422
itf05g02620	arogenate dehydrogenase	Chr05	2050801	2052390	42.941	-2.69295	0.556048	-4.82587	1.3939e-06	0.000194914
itf05g04350	nodulin MtN21 /EamA-like transporter family protein	Chr05	4038706	4043385	437.086	-3.58764	0.585992	-6.23033	4.65464e-10	7.12133e-07
itf05g04360	nodulin MtN21 /EamA-like transporter family protein	Chr05	4058907	4061284	24.5013	-2.82976	0.771162	-4.05982	4.91115e-05	0.00207698
itf05g04460	nodulin MtN21 /EamA-like transporter family protein	Chr05	4127681	4130594	90.386	-4.11376	0.685807	-5.97799	2.25903e-09	1.89532e-06
itf05g04470	nodulin MtN21 /EamA-like transporter family protein	Chr05	4151912	4153279	348.803	-4.21132	0.665926	-6.55827	5.44346e-11	1.41579e-07
itf05g05630	hypothetical protein	Chr05	5353177	5353459	13.6248	2.82771	0.63481	4.2814	1.85723e-05	0.001051
itf05g09080	nodulin MtN21 /EamA-like transporter family protein	Chr05	10328631	10332490	811.885	-4.516	0.663572	-7.06217	1.63919e-12	1.06584e-08
itf05g11020	serine carboxypeptidase-like	Chr05	13159879	13163732	24.7851	-2.2603	0.522618	-4.29693	1.73183e-05	0.00100319
itf05g11530	nodulin MtN21 /EamA-like transporter family protein	Chr05	14009037	14011659	179.36	2.81511	0.696007	3.99252	6.53746e-05	0.00249544
itf05g11980	DUF1475 domain containing protein	Chr05	14788517	14797994	147.759	2.22471	0.608912	3.76703	0.000165202	0.0044572
itf05g11990	DUF1475 domain containing protein	Chr05	14800050	14808943	143.073	2.59652	0.697391	4.00923	6.09177e-05	0.00237854
itf05g12200	Haloacid dehalogenase-like hydrolase (HAD) superfamily protein	Chr05	15118728	15122120	370.452	-2.10206	0.498798	-4.2206	2.43649e-05	0.00126237
itf05g12890	bZIP transcription factor family protein	Chr05	15915412	15918041	297.601	-3.00299	0.652106	-4.85893	1.18021e-06	0.000173425
itf05g13690	NAD(P)-linked oxidoreductase superfamily protein	Chr05	16813307	16815590	72.0266	-2.99806	0.667601	-4.65569	3.22895e-06	0.000344187
itf05g13920	Cytochrome P450 superfamily protein	Chr05	17107207	17112063	309.925	-3.00482	0.801193	-4.99208	5.97319e-07	0.00010154
itf05g14720	Integrin-linked protein kinase family	Chr05	18009483	18010624	7.1231	-2.87246	0.671321	-4.41491	1.01054e-05	0.000718116
itf05g15110	receptor serine/threonine kinase, putative	Chr05	18248756	18249689	181.25	2.55256	0.535576	4.79801	1.6025e-06	0.00021374
itf05g15220	cytochrome P450, family 71, subfamily A, polypeptide	Chr05	18333158	18335952	8.67374	3.61379	0.805309	4.48179	7.40208e-06	0.000581633
itf05g15240	LOB domain-containing protein	Chr05	18353590	18355223	802.194	2.17353	0.505672	4.34659	1.38268e-05	0.000870752
itf05g15330	UDP-Glycosyltransferase superfamily protein	Chr05	18480200	18481777	19.3419	-2.03053	0.448619	-4.47095	7.78724e-06	0.000599225
itf05g15500	UDP-Glycosyltransferase superfamily protein	Chr05	18594813	18596501	121.954	-2.37459	0.496358	-4.75803	1.95488e-06	0.000245485
itf05g15510	UDP-Glycosyltransferase superfamily protein	Chr05	18613492	18615186	1336.67	-2.00196	0.458117	-4.3639	1.27765e-05	0.00083595
itf05g15840	Peroxidase superfamily protein	Chr05	18840926	18843990	4.70852	-2.64326	0.807553	-3.47066	0.000519174	0.00948925
itf05g15990	NOD26-like intrinsic protein 4;2	Chr05	18915133	18918228	110.607	-2.81423	0.653471	-4.39349	1.11547e-05	0.00076752
itf05g16370	Glycosyl transferase, family	Chr05	19218439	19224781	18284.2	2.53566	0.602141	4.27829	1.88332e-05	0.0010542
itf05g17570	Peroxidase superfamily protein	Chr05	20006029	20007526	244.929	-3.44948	0.683169	-5.23267	1.6708e-07	4.43426e-05
itf05g18700	basic helix-loop-helix (bHLH) DNA-binding superfamily protein	Chr05	20832283	20834772	98.1186	2.00608	0.546319	3.63035	0.000283037	0.00639574
itf05g18910	myb domain protein	Chr05	20951310	20952788	2.2777	-2.74077	0.74047	-3.72586	0.000194651	0.00494885
itf05g20040	2-oxoglutarate (2OG) and Fe(II)-dependent oxygenase superfamily protein	Chr05	21576548	21577486	58.6302	2.3274	0.527607	4.40294	1.06796e-05	0.000746612
itf05g20820	RmlC-like cupins superfamily protein	Chr05	21993167	21994118	120.419	-2.40783	0.61408	-4.06552	4.7925e-05	0.00204677
itf05g21010	Eukaryotic aspartyl protease family protein	Chr05	22113090	22117097	79.123	-2.17657	0.465272	-4.67345	2.9618e-06	0.000329203
itf05g21120	conserved hypothetical protein	Chr05	22189134	22190874	46.2742	-2.18913	0.504324	-4.30587	1.66332e-05	0.000976552
itf05g21540	Leucine-rich receptor-like protein kinase family protein	Chr05	22455018	22459270	93.0631	2.84799	0.61947	4.62253	3.79079e-06	0.000383637
itf05g21850	NAD(P)-binding Rossmann-fold superfamily protein	Chr05	22660105	22662212	9.37963	3.33346	0.787111	3.81968	0.000133623	0.00390495
itf05g22730	TIFY domain/Divergent CCT motif family protein	Chr05	23170755	23173175	30.7918	3.20599	0.748011	4.29087	1.77977e-05	0.00102185
itf05g22770	STELAR K+ outward rectifier	Chr05	23198979	23206943	130.493	-2.34746	0.790586	-4.21125	2.53967e-05	0.00129509
itf05g23210	hydroxy methylglutaryl CoA reductase	Chr05	23499920	23503613	787.325	-3.29846	0.514748	-6.46299	1.02654e-10	2.18035e-07
itf05g23440	acyl activating enzyme	Chr05	23623914	23625554	141.927	-2.40197	0.693661	-3.78462	0.000153946	0.004316
itf05g24060	Lateral root primordium (LRP) protein-related	Chr05	24018218	24020130	16.9125	2.23275	0.515328	4.27349	1.92438e-05	0.00106266
itf05g24160	cytochrome P450, family 722, subfamily A, polypeptide	Chr05	24090259	24092788	207.256	-2.63002	0.805809	-5.32025	1.03627e-07	3.17087e-05
itf05g25110	beta-ketoacyl reductase	Chr05	24546834	24550073	34.138	-2.24765	0.598912	-3.71452	0.00020359	0.00509642
itf05g25220	protochlorophyllide oxidoreductase A	Chr05	24591225	24594141	20.1299	2.68562	0.733397	3.63637	0.000276503	0.00630286
itf05g26120	WRKY DNA-binding protein	Chr05	24993059	24996217	85.5013	-2.36653	0.66345	-3.67506	0.000237791	0.00569493
itf06g00630	Protein phosphatase 2C family protein	Chr06	861043	863778	54.8549	-2.43347	0.649453	-3.86788	0.000109784	0.00349925
itf06g03530	HCO3- transporter family	Chr06	5198459	5202907	29.7944	-4.73109	0.751593	-5.48542	4.12493e-08	1.55486e-05
itf06g05380	K-box region and MADS-box transcription factor family protein	Chr06	7492214	7495813	18.4734	-2.14107	0.576883	-3.60522	0.000311891	0.00680671	NONC	4
itf06g06380	UDP-Glycosyltransferase superfamily protein	Chr06	8769251	8771947	74.9513	-2.70162	0.54898	-4.91107	9.05793e-07	0.000141071	NONC	4
itf06g06570	Protein of unknown function (DUF1624)	Chr06	8989385	8997936	195.358	-3.29974	0.780506	-5.32847	9.90409e-08	3.10356e-05	NONC	4
itf06g07230	plasma membrane intrinsic protein 2;4	Chr06	9641231	9642752	1387.52	-2.7709	0.632615	-4.59004	4.43157e-06	0.000431688	NONC_TNR	4_5
itf06g07250	plasma membrane intrinsic protein 2;4	Chr06	9653984	9655268	1393.32	-2.30573	0.616059	-3.8967	9.75142e-05	0.00323914	NONC_TNR	4_5
itf06g07270	plasma membrane intrinsic protein 2;4	Chr06	9670579	9672011	806.734	-2.26453	0.61544	-3.82435	0.000131116	0.00387083	NONC_TNR	4_5
itf06g07450	Protein of unknown function (DUF640)	Chr06	9848168	9848944	298.103	2.52563	0.506728	5.00267	5.65407e-07	9.86958e-05	NONC_TNR	4_5
itf06g09750	myb-like transcription factor family protein	Chr06	11957032	11960200	51.0848	-2.05953	0.567247	-3.66834	0.000244128	0.00580927
itf06g10530	cytochrome P450, family 711, subfamily A, polypeptide	Chr06	13223553	13226929	49.8716	-2.03416	0.55119	-3.69438	0.000220421	0.00539315
itf06g11390	Kunitz family trypsin and protease inhibitor protein	Chr06	14388031	14388902	93.0783	2.69947	0.598234	4.27204	1.93693e-05	0.00106732
itf06g11450	Kunitz family trypsin and protease inhibitor protein	Chr06	14419490	14420593	87.8379	2.14109	0.474616	4.47239	7.73501e-06	0.000596973
itf06g12380	terpene synthase	Chr06	15360083	15365935	46.3721	-2.67763	0.680525	-3.86813	0.000109674	0.00349925
itf06g13600	UDP-glucosyltransferase 74F2	Chr06	16739480	16741734	413.147	-2.15285	0.603003	-3.58688	0.000334661	0.0070714
itf06g13630	UDP-Glycosyltransferase superfamily protein	Chr06	16770262	16770985	89.4414	-2.09236	0.537509	-3.92735	8.58868e-05	0.00295872
itf06g14030	BR enhanced expression	Chr06	17153037	17155153	16.314	2.58105	0.71834	3.59007	0.000330586	0.00702467
itf06g14930	organic cation/carnitine transporter	Chr06	18097852	18099397	253.701	2.34685	0.628294	3.88616	0.000101842	0.00334445
itf06g16700	cytochrome P450, family 83, subfamily B, polypeptide	Chr06	19589722	19591609	24.1452	3.1533	0.605105	4.45471	8.40071e-06	0.000629666
itf06g17290	hypothetical protein	Chr06	20006747	20008638	241.808	2.29155	0.518495	4.43197	9.33768e-06	0.000682202
itf06g17940	cytochrome P450, family 90, subfamily D, polypeptide	Chr06	20551764	20556640	38.4203	-2.04124	0.532311	-3.80605	0.000141204	0.00404355
itf06g18030	Glycosyl hydrolases family 32 protein	Chr06	20642398	20645135	100.997	-3.42805	0.785717	-5.20235	1.96783e-07	4.96906e-05
itf06g18910	phosphatidylinositol-4-phosphate 5-kinase family protein	Chr06	21161001	21163721	188.479	-2.24141	0.609647	-3.64871	0.000263565	0.0060988
itf06g20760	solute:sodium symporters;urea transmembrane transporters	Chr06	22442037	22445287	13.3024	-2.23272	0.538649	-4.07289	4.64325e-05	0.00199969
itf06g20770	alternative oxidase 1A	Chr06	22448590	22450622	313.107	-2.90284	0.617529	-4.7274	2.2741e-06	0.000277686
itf06g21400	Transducin/WD40 repeat-like superfamily protein	Chr06	22861171	22868435	97.5943	-2.30962	0.599097	-3.8584	0.000114131	0.00357205
itf06g22050	oxidoreductases, acting on NADH or NADPH	Chr06	23269523	23271422	30.8424	-2.20051	0.481321	-4.54298	5.5464e-06	0.000487353
itf06g22440	BEL1-like homeodomain	Chr06	23540838	23544926	45.3905	-2.95568	0.624768	-4.80139	1.57569e-06	0.000211573
itf06g23220	Gibberellin-regulated family protein	Chr06	23981248	23982026	76.0323	3.33708	0.562515	5.91159	3.38826e-09	2.51786e-06
itf06g23520	basic leucine-zipper	Chr06	24129229	24129735	9.88818	-2.07987	0.570812	-3.56229	0.000367635	0.00752899
itf06g23780	KNOTTED-like from Arabidopsis thaliana	Chr06	24268995	24273123	253.216	2.29472	0.481683	4.77789	1.77144e-06	0.000229221
itf06g23940	Glutamyl-tRNA reductase family protein	Chr06	24393433	24396917	61.0411	2.06683	0.611399	3.44403	0.000573117	0.00998335
itf06g24540	UDP-glucosyl transferase 85A2	Chr06	24733301	24735283	772.525	2.34112	0.471227	4.9767	6.46767e-07	0.000107145
itf06g24550	UDP-glucosyl transferase 85A2	Chr06	24740708	24742738	651.016	2.61973	0.493245	5.32212	1.02564e-07	3.17087e-05
itf06g24590	UDP-glucosyl transferase 85A2	Chr06	24755848	24758407	4.68785	3.32797	0.801243	4.03412	5.48062e-05	0.00223076
itf06g26260	mini zinc finger	Chr06	25627125	25627856	40.6092	-3.17018	0.631992	-4.97856	6.40602e-07	0.000107145
itf06g26640	Protein of unknown function, DUF593	Chr06	25780384	25782713	7.39246	-2.27686	0.532902	-4.11624	3.85097e-05	0.00178538
itf07g00390	bZIP transcription factor family protein	Chr07	232395	238740	566.266	-2.6775	0.519652	-5.18173	2.19833e-07	5.25148e-05
itf07g01010	HSP20-like chaperones superfamily protein	Chr07	543794	545553	72.8104	-2.107	0.448295	-4.69479	2.66884e-06	0.000309584	NOCR	5
itf07g01220	terpene synthase-like sequence-1,8-cineole	Chr07	656695	658757	160.826	3.01051	0.738182	4.28184	1.85354e-05	0.001051	NOCR	5
itf07g01250	cystatin B	Chr07	696534	697574	521.151	3.1625	0.661196	4.70087	2.5905e-06	0.00030487	NOCR	5
itf07g01260	cystatin B	Chr07	700111	701178	4811.57	2.3718	0.518492	4.5339	5.79033e-06	0.000503681	NOCR	5
itf07g02400	2-oxoglutarate (2OG) and Fe(II)-dependent oxygenase superfamily protein	Chr07	1533463	1534540	88.7682	2.47501	0.525154	4.71535	2.41301e-06	0.00028789	NOCR	5
itf07g02780	2-oxoglutarate (2OG) and Fe(II)-dependent oxygenase superfamily protein	Chr07	1794846	1795923	63.0155	2.6485	0.520627	5.05187	4.37515e-07	8.24589e-05	NOCR	5
itf07g04650	Pectin lyase-like superfamily protein	Chr07	3025735	3028958	116.962	-4.06724	0.746349	-5.72112	1.05822e-08	5.45763e-06	NOCR_FYTHA	5_2
itf07g05400	Protein of unknown function, DUF599	Chr07	3569839	3574635	269.328	-3.86737	0.740486	-5.70779	1.14455e-08	5.72474e-06	NOCR_FYTHA	5_2
itf07g06950	Polyketide cyclase/dehydrase and lipid transport superfamily protein	Chr07	4830550	4831237	186.481	2.6845	0.595201	4.47793	7.53691e-06	0.000588671	NOCR_FYTHA	5_2
itf07g12160	Stress responsive A/B Barrel Domain	Chr07	10881006	10882437	145.658	2.11055	0.496398	4.24965	2.141e-05	0.0011553	NOCR	5
itf07g12840	hypothetical protein	Chr07	11702663	11703101	12.031	2.1703	0.569381	3.70633	0.000210283	0.00519397	NOCR	5
itf07g12880	basic leucine-zipper	Chr07	11729920	11730789	519.15	-3.32979	0.545161	-6.12659	8.97823e-10	1.11513e-06	NOCR	5
itf07g16300	conserved hypothetical protein	Chr07	16489030	16489669	8.44096	2.6312	0.663837	3.59323	0.000326607	0.00698005
itf07g16610	Vacuolar iron transporter (VIT) family protein	Chr07	16810779	16816122	261.428	-2.36705	0.728395	-3.44968	0.000561254	0.00990344
itf07g18580	Zinc finger C-x8-C-x5-C-x3-H type family protein	Chr07	18556257	18560193	137.194	2.85111	0.599086	4.82009	1.43495e-06	0.000198799
itf07g19190	lysine histidine transporter	Chr07	19048599	19051980	24.8776	-2.75398	0.509488	-5.31095	1.09056e-07	3.26028e-05
itf07g20360	FER-like regulator of iron uptake	Chr07	20727753	20729779	298.778	-2.30423	0.606409	-3.82066	0.000133095	0.00390267
itf07g21010	Cytochrome P450 superfamily protein	Chr07	21517996	21521074	80.7524	-2.97296	0.698954	-4.57758	4.70386e-06	0.000446278
itf07g21990	conserved hypothetical protein	Chr07	22387367	22387924	31.2787	-3.36579	0.723878	-4.58465	4.54754e-06	0.000441332
itf07g23900	NAD(P)-binding Rossmann-fold superfamily protein	Chr07	23798612	23800989	592.571	-2.12666	0.552183	-3.86	0.000113386	0.00355308
itf08g00230	Protein of unknown function (DUF567)	Chr08	103007	104111	268.622	-2.14952	0.472124	-4.55042	5.35387e-06	0.00048183	NCYTHA	3
itf08g00690	Predicted AT-hook DNA-binding family protein	Chr08	413480	414374	102.685	-2.35604	0.568476	-4.15968	3.187e-05	0.00154576	NCYTHA	3
itf08g01030	nitrate transporter 1.1	Chr08	635399	639973	483.261	-2.88264	0.747567	-4.27979	1.87069e-05	0.0010542	NCYTHA	3
itf08g02230	homolog of Medicago truncatula MTN3	Chr08	1554536	1557236	42.478	3.41764	0.623035	5.31596	1.06096e-07	3.20867e-05	NCYTHA	3
itf08g03460	salt tolerance homolog2	Chr08	2367382	2369622	77.5448	2.15409	0.597076	3.60423	0.000313082	0.00680671	NCYTHA_FYTHA	3_3
itf08g03520	Lateral root primordium (LRP) protein-related	Chr08	2414972	2416511	56.7546	2.0154	0.452763	4.43398	9.2509e-06	0.000677765	NCYTHA_FYTHA	3_3
itf08g03640	cytokinin oxidase	Chr08	2466886	2473251	795.127	-2.24591	0.512454	-4.36409	1.27651e-05	0.00083595	NCYTHA_FYTHA	3_3
itf08g04420	basic helix-loop-helix (bHLH) DNA-binding superfamily protein	Chr08	2928468	2929164	14.9996	-3.49772	0.542798	-6.05975	1.36336e-09	1.36412e-06	NCYTHA_FYTHA_RYTHA	3_3_1
itf08g04620	receptor-like protein kinase	Chr08	3113469	3114552	154.102	2.25398	0.502083	4.52983	5.90316e-06	0.000506717	NCYTHA_FYTHA_RYTHA	3_3_1
itf08g05070	serine carboxypeptidase-like	Chr08	3408295	3413647	21.9308	2.51441	0.613644	4.07111	4.67905e-05	0.0020049	NCYTHA_FYTHA_RYTHA	3_3_1
itf08g05360	1-amino-cyclopropane-1-carboxylate synthase	Chr08	3629115	3631656	18.4399	-2.32486	0.552081	-4.12145	3.765e-05	0.00175491	NCYTHA_RYTHA	3_1
itf08g05590	Homeobox-leucine zipper protein family	Chr08	3820553	3822315	79.5882	2.34338	0.59014	4.02839	5.61608e-05	0.00226463	NCYTHA_RYTHA	3_1
itf08g05640	Leucine-rich receptor-like protein kinase family protein	Chr08	3915161	3919633	17.1266	-3.58884	0.612588	-5.56085	2.68466e-08	1.12622e-05	NCYTHA_RYTHA	3_1
itf08g05700	beta HLH protein	Chr08	3968617	3971355	29.6017	2.07152	0.58238	3.58686	0.000334688	0.0070714	NCYTHA_RYTHA	3_1
itf08g07890	cellulose synthase like G3	Chr08	5864284	5870578	85.1814	-2.29294	0.694555	-3.56012	0.000370692	0.00756183	RYTHA	1
itf08g09270	formin homology	Chr08	7244739	7249151	35.9899	2.22763	0.538616	4.13129	3.60729e-05	0.00169354	RYTHA	1
itf08g09490	Ankyrin repeat family protein	Chr08	7516102	7527829	551.476	2.1865	0.571487	3.81535	0.000135988	0.00394738	RYTHA	1
itf08g12210	UDP-glucosyl transferase 74B1	Chr08	11104979	11107688	32.6921	2.92466	0.625543	4.55266	5.29712e-06	0.000480045	RYTHA	1
itf08g12710	transmembrane receptors;ATP binding	Chr08	11660126	11663705	62.9327	-2.09756	0.513783	-4.08546	4.3989e-05	0.0019411	RYTHA	1
itf08g12770	2-oxoglutarate (2OG) and Fe(II)-dependent oxygenase superfamily protein	Chr08	11741330	11743095	566.425	-2.79666	0.793732	-5.08704	3.63692e-07	7.33276e-05	RYTHA	1
itf08g12800	2-oxoglutarate (2OG) and Fe(II)-dependent oxygenase superfamily protein	Chr08	11757409	11759732	174.47	-2.18423	0.80879	-3.65855	0.000253643	0.00595163	RYTHA	1
itf08g13510	Protein of unknown function (DUF1645)	Chr08	12483972	12494116	75.2106	-2.34353	0.620199	-3.77923	0.000157314	0.00434813	RYTHA	1
itf08g16420	transmembrane receptors;ATP binding	Chr08	15781977	15782466	5.61668	2.90591	0.742773	3.98488	6.75147e-05	0.00254123
itf09g00890	fructose-bisphosphate aldolase	Chr09	387509	390121	441.895	3.86272	0.663194	6.04406	1.50282e-09	1.44766e-06
itf09g01640	carboxyesterase	Chr09	792815	794008	189.785	-2.54592	0.600873	-4.3186	1.57019e-05	0.00094182	NONC_TNR	5_6
itf09g02980	Class I glutamine amidotransferase-like superfamily protein	Chr09	1423250	1427844	511.156	-3.09043	0.563304	-5.50756	3.63848e-08	1.4559e-05	NONC_TNR_NOCR	5_6_6
itf09g04680	Protein of unknown function (DUF3537)	Chr09	2328282	2330575	12.7055	-2.95225	0.780358	-3.94952	7.83093e-05	0.00277108	NONC_TNR_NOCR	5_6_6
itf09g04780	KNOX/ELK homeobox transcription factor	Chr09	2395766	2400629	11.571	2.97406	0.798007	3.99083	6.58426e-05	0.00250366	NONC_TNR_NOCR	5_6_6
itf09g05490	protein serine/threonine kinases;protein kinases;ATP binding;sugar binding;kinases;carbohydrate binding	Chr09	2770997	2779084	21.4532	-2.30401	0.61635	-3.71731	0.000201358	0.00506981	TNR_NOCR	6_6
itf09g05920	Major facilitator superfamily protein	Chr09	3027445	3030437	146.687	2.34996	0.412866	5.68622	1.29885e-08	6.14216e-06	TNR_NOCR	6_6
itf09g06400	ethylene-forming enzyme	Chr09	3331313	3332548	26.674	-2.92092	0.632294	-4.49655	6.90663e-06	0.000563422	TNR_NOCR	6_6
itf09g06430	Protein of unknown function (DUF_B2219) domain containing protein	Chr09	3346759	3349125	10.3683	-2.91766	0.731396	-4.0157	5.92685e-05	0.00234273	TNR_NOCR	6_6
itf09g07180	GDSL-like Lipase/Acylhydrolase superfamily protein	Chr09	3763723	3766187	84.0016	-2.1696	0.433373	-5.00721	5.5226e-07	9.77124e-05	TNR_NOCR	6_6
itf09g07310	GDSL-like Lipase/Acylhydrolase superfamily protein	Chr09	3878159	3882883	157.598	-2.4903	0.407047	-6.12614	9.00372e-10	1.11513e-06	TNR_NOCR	6_6
itf09g08400	FAD-binding Berberine family protein	Chr09	4538670	4540269	67.8483	2.43683	0.617442	3.97476	7.04512e-05	0.00261344	TNR	6
itf09g08750	NAD(P)-binding Rossmann-fold superfamily protein	Chr09	4772552	4773752	5.94817	-2.56907	0.772215	-3.68326	0.000230267	0.00558676	TNR	6
itf09g08770	NAD(P)-binding Rossmann-fold superfamily protein	Chr09	4779974	4781336	9.43852	-2.8558	0.739434	-3.56587	0.000362652	0.0074563	TNR	6
itf09g09140	HXXXD-type acyl-transferase family protein	Chr09	5019127	5020865	695.425	2.11721	0.476385	4.42919	9.45872e-06	0.000686962
itf09g09220	conserved hypothetical protein	Chr09	5093504	5097441	30.1856	2.14561	0.585058	3.60688	0.000309902	0.00679616
itf09g09240	light harvesting complex photosystem II	Chr09	5102690	5104533	42.7647	2.41061	0.671501	3.64055	0.00027206	0.0062393
itf09g09420	Thiamine pyrophosphate dependent pyruvate decarboxylase family protein	Chr09	5256602	5259127	337.355	3.44558	0.707396	5.15296	2.56405e-07	5.84986e-05
itf09g10100	hypothetical protein	Chr09	5661479	5663052	300.219	-2.19284	0.584993	-3.72871	0.000192466	0.00490264
itf09g10260	protein kinases;ubiquitin-protein ligases	Chr09	5749301	5750995	11.7081	2.08017	0.52899	3.84834	0.000118921	0.00366039
itf09g10600	UDP-Glycosyltransferase superfamily protein	Chr09	5951387	5953210	44.1574	2.37587	0.704533	3.52652	0.000421054	0.00823399
itf09g11060	beta-6 tubulin	Chr09	6289201	6291830	4813.7	2.05141	0.435714	4.73464	2.19443e-06	0.000269222
itf09g11520	Haloacid dehalogenase-like hydrolase (HAD) superfamily protein	Chr09	6640042	6643874	1178.7	-2.16017	0.511667	-4.21389	2.5101e-05	0.00128262
itf09g13000	NDR1/HIN1-like	Chr09	7791285	7792263	499.631	2.43092	0.428989	5.66558	1.46528e-08	6.57076e-06
itf09g13900	Integrase-type DNA-binding superfamily protein	Chr09	8579052	8579747	23.7867	2.85089	0.809354	4.08523	4.40328e-05	0.0019411
itf09g13920	Duplicated homeodomain-like superfamily protein	Chr09	8597949	8600091	227.916	2.47207	0.542196	4.55328	5.28153e-06	0.000480045
itf09g14110	sequence-specific DNA binding transcription factors	Chr09	8745994	8747328	145.542	2.62412	0.716458	4.18978	2.79229e-05	0.00139449
itf09g14540	xyloglucan endotransglucosylase/hydrolase	Chr09	9110909	9113553	449.231	3.27781	0.664734	5.40562	6.45856e-08	2.27001e-05
itf09g14960	polyubiquitin	Chr09	9610680	9611975	38.7078	2.21774	0.50306	4.36447	1.27431e-05	0.00083595
itf09g15510	Eukaryotic aspartyl protease family protein	Chr09	10018151	10020921	387.742	2.74416	0.551289	5.0718	3.9407e-07	7.68384e-05
itf09g15760	uclacyanin	Chr09	10218901	10219707	195.242	-2.25258	0.638275	-3.62441	0.00028962	0.00649933
itf09g15970	AGAMOUS-like	Chr09	10426043	10428968	13.4738	2.57277	0.633785	3.9461	7.94355e-05	0.00279572
itf09g16110	NAD(P)-binding Rossmann-fold superfamily protein	Chr09	10600847	10602746	32.9765	-2.13375	0.51178	-4.10302	4.07793e-05	0.00185425
itf09g16510	MATE efflux family protein	Chr09	11127147	11131143	499.679	-3.44945	0.604455	-5.79608	6.78809e-09	4.28308e-06
itf09g17200	GDSL lipase	Chr09	12029646	12034671	21.0088	-2.71322	0.66605	-3.8533	0.000116536	0.00361462
itf09g17780	bZIP transcription factor family protein	Chr09	12932958	12939664	99.0376	-2.58456	0.498739	-5.18987	2.10444e-07	5.15501e-05
itf09g20250	hypothetical protein	Chr09	16426956	16428295	8.16623	-3.02719	0.656442	-4.26427	2.00559e-05	0.00109129
itf09g21770	cytochrome P450, family 704, subfamily A, polypeptide	Chr09	18489177	18492340	21.0933	-2.00379	0.576539	-3.4514	0.00055769	0.00987561
itf09g22550	Aluminium activated malate transporter family protein	Chr09	19284154	19288351	223.98	-3.91012	0.777263	-6.09546	1.09124e-09	1.234e-06
itf09g23200	pathogenesis-related	Chr09	20146053	20147297	296.017	-3.05958	0.640547	-4.79041	1.66437e-06	0.000220493
itf09g23360	HSP20-like chaperones superfamily protein	Chr09	20286917	20288055	24.3233	-2.62755	0.576631	-4.50362	6.68042e-06	0.000556895
itf09g23370	HSP20-like chaperones superfamily protein	Chr09	20289084	20290249	22.8935	-2.39488	0.596674	-3.98783	6.66807e-05	0.00252813
itf09g26430	Cupredoxin superfamily protein	Chr09	22790217	22793635	1003.64	2.0133	0.474681	4.29291	1.76349e-05	0.001017
itf09g27030	hypothetical protein	Chr09	23189369	23190252	123.497	2.20411	0.472523	4.638	3.51802e-06	0.000366001
itf10g00970	SKU5 similar	Chr10	848267	852680	748.853	2.06472	0.590703	3.6558	0.000256379	0.00596971
itf10g02010	sulfotransferase	Chr10	1605391	1608227	50.1534	2.2866	0.626593	3.50292	0.00046018	0.00876194
itf10g02030	sulfotransferase	Chr10	1624728	1625652	85.0892	2.4084	0.669042	3.64326	0.000269212	0.00619639
itf10g02550	Protein of unknown function (DUF640)	Chr10	2088301	2088877	246.715	2.03975	0.448428	4.54903	5.38931e-06	0.000483347	FYTHA	4
itf10g03920	Leucine-rich receptor-like protein kinase family protein	Chr10	3404720	3408763	152.593	2.06951	0.523558	4.01821	5.86428e-05	0.00232861	NCYTHA	4
itf10g04080	UDP-Glycosyltransferase superfamily protein	Chr10	3539768	3541244	138.07	-2.18532	0.475374	-4.57867	4.67948e-06	0.000446278	NCYTHA	4
itf10g05520	ammonium transporter	Chr10	5432822	5441133	7.69946	-3.12673	0.741549	-4.49397	6.99085e-06	0.000563422	NCYTHA	4
itf10g10830	nodulin MtN21 /EamA-like transporter family protein	Chr10	13229991	13232788	29.7817	-2.85127	0.781948	-4.1689	3.06075e-05	0.00150486	NCYTHA	4
itf10g10920	Trypsin and protease inhibitor domain containing protein	Chr10	13341871	13343227	38699	2.99084	0.673515	4.48889	7.15962e-06	0.000571764	NCYTHA	4
itf10g11390	nuclear factor Y, subunit B4	Chr10	13849218	13849608	20.7657	-2.7475	0.716887	-3.83396	0.000126095	0.00378271	NCYTHA	4
itf10g12210	Protein kinase family protein	Chr10	14787070	14787607	451.199	-3.62018	0.722199	-5.34053	9.26774e-08	2.93957e-05	NCYTHA	4
itf10g13450	myb domain protein	Chr10	16097629	16099234	15.0047	2.21969	0.614047	3.5663	0.000362056	0.0074563	NCYTHA	4
itf10g15170	HSP20-like chaperones superfamily protein	Chr10	17611493	17612303	368.499	2.20231	0.384483	5.70227	1.18219e-08	5.80143e-06	NCYTHA	4
itf10g15220	Peptidase S24/S26A/S26B/S26C family protein	Chr10	17637744	17640463	7.63971	-2.28539	0.750256	-3.57125	0.000355277	0.00739231	NCYTHA	4
itf10g15230	Lactoylglutathione lyase / glyoxalase I family protein	Chr10	17655626	17656675	844.311	-2.35773	0.496283	-4.76576	1.88141e-06	0.000241053	NCYTHA	4
itf10g15680	O-acetylserine (thiol) lyase B	Chr10	18157015	18162469	114.842	2.65317	0.683594	4.06132	4.87957e-05	0.00206698	NCYTHA	4
itf10g16210	Calcium-binding EF-hand family protein	Chr10	18557086	18559727	312.206	-3.30847	0.6828	-5.17131	2.32464e-07	5.39836e-05	NCYTHA	4
itf10g16380	Aluminium activated malate transporter family protein	Chr10	18753555	18755566	94.3439	-3.49042	0.793392	-5.18843	2.12075e-07	5.15501e-05	NCYTHA	4
itf10g16420	oligopeptide transporter	Chr10	18778235	18781368	3.4233	-2.61834	0.713796	-3.83504	0.000125545	0.0037749	NCYTHA	4
itf10g17030	VQ motif-containing protein	Chr10	19249601	19250259	75.3111	-2.48759	0.700987	-3.68408	0.000229532	0.00557414	NCYTHA	4
itf10g17050	hypothetical protein	Chr10	19272167	19272857	128.166	-2.77286	0.631502	-4.43067	9.39389e-06	0.000684386	NCYTHA	4
itf10g17750	receptor like protein	Chr10	19764682	19776853	62.6963	2.03438	0.495718	4.07374	4.62635e-05	0.00199969
itf10g18630	NOD26-like intrinsic protein 1;2	Chr10	20439767	20441752	308.946	-4.8391	0.61694	-8.04213	8.82873e-16	2.29626e-11
itf10g19340	senescence-associated gene	Chr10	21240303	21242677	15.2788	-2.85767	0.758492	-3.59606	0.000323078	0.00695508
itf10g19970	Pollen Ole e 1 allergen and extensin family protein	Chr10	21699702	21700870	46.0901	2.10846	0.515638	4.07419	4.61753e-05	0.00199969
itf10g20590	Peroxidase superfamily protein	Chr10	22107015	22109052	229.223	-2.50071	0.484254	-5.22423	1.74884e-07	4.54855e-05	NONC_TNR	6_7
itf10g20600	Peroxidase superfamily protein	Chr10	22111602	22113112	316.78	-2.25594	0.451735	-5.02109	5.13791e-07	9.41069e-05	NONC_TNR	6_7
itf10g21130	Ubiquitin-like superfamily protein	Chr10	22433809	22434918	23.9409	-3.01925	0.56239	-5.26274	1.41922e-07	4.01222e-05	NONC_TNR	6_7
itf10g22390	Protein of unknown function (DUF793)	Chr10	23128450	23129818	8.41413	2.78144	0.70697	3.71212	0.000205532	0.00513022	NONC_TNR	6_7
itf10g22610	2-oxoglutarate (2OG) and Fe(II)-dependent oxygenase superfamily protein	Chr10	23260448	23262574	31.5651	-2.66954	0.762672	-3.7077	0.000209147	0.00518066	NONC_TNR	6_7
itf10g24090	UDP-glucosyl transferase 73B3	Chr10	23896651	23898103	14.7088	-2.41541	0.698161	-3.46062	0.000538925	0.00973002	TNR	7
itf10g24420	Peroxidase superfamily protein	Chr10	24032026	24033357	204.344	-3.85712	0.740599	-5.91956	3.22798e-09	2.46931e-06	TNR	7
itf11g00900	related to AP2	Chr11	426441	427490	14.7565	-3.57281	0.744646	-4.5349	5.76313e-06	0.000502997
itf11g02340	Auxin efflux carrier family protein	Chr11	1167737	1170626	68.0572	-3.81797	0.701391	-5.49521	3.90243e-08	1.49764e-05
itf11g03360	ADP glucose pyrophosphorylase	Chr11	1732804	1736700	4861.92	2.20198	0.550972	3.98567	6.72896e-05	0.00254011
itf11g03530	HVA22-like protein F	Chr11	1842860	1844166	64.0754	-2.35357	0.494849	-4.7432	2.10372e-06	0.000259316
itf11g03870	Leucine-rich repeat protein kinase family protein	Chr11	2019491	2023313	9.31884	-3.27619	0.499108	-5.96333	2.47142e-09	2.00872e-06
itf11g04600	conserved hypothetical protein	Chr11	2377523	2377866	64.7578	2.05075	0.455412	4.48395	7.32754e-06	0.000579841
itf11g05320	GRAS family transcription factor	Chr11	2764978	2766307	3.28133	-3.45228	0.764808	-3.97395	7.06914e-05	0.00261538
itf11g08440	jasmonate-zim-domain protein	Chr11	4732098	4734567	3036.82	2.08364	0.417236	4.99525	5.87582e-07	0.000100542
itf11g08560	Cytochrome P450 superfamily protein	Chr11	4846233	4851621	128.11	4.1189	0.68211	5.80038	6.61646e-09	4.28308e-06
itf11g09560	sulfate transporter 3;4	Chr11	5584659	5588587	71.7648	2.3524	0.623641	3.96599	7.30924e-05	0.00266983
itf11g09630	2-oxoglutarate (2OG) and Fe(II)-dependent oxygenase superfamily protein	Chr11	5689912	5692484	490.548	-2.6966	0.789793	-4.85118	1.22731e-06	0.000179333
itf11g09710	HCO3- transporter family	Chr11	5729420	5733499	72.1394	-2.81523	0.7095	-4.08783	4.3542e-05	0.00192645
itf11g09880	Glycosyl hydrolase superfamily protein	Chr11	5817409	5818942	20.7415	-2.07793	0.486079	-4.23732	2.26201e-05	0.00120559
itf11g11620	homeobox protein	Chr11	7351231	7351918	27.4592	2.16086	0.618286	3.49618	0.000471973	0.00890732	NOCR	7
itf11g11710	Adenine nucleotide alpha hydrolases-like superfamily protein	Chr11	7425059	7429329	38.0704	-2.12592	0.46859	-4.5192	6.20741e-06	0.00052761	NOCR	7
itf11g13210	hypothetical protein	Chr11	8870184	8873818	164.282	2.74367	0.671099	4.34169	1.4139e-05	0.000880698	NOCR	7
itf11g13740	protein serine/threonine kinases;protein kinases;ATP binding;sugar binding;kinases;carbohydrate binding	Chr11	9579590	9583219	201.345	2.14659	0.497905	4.33989	1.42555e-05	0.000882787	NOCR	7
itf11g15540	GRAM domain-containing protein / ABA-responsive protein-related	Chr11	12035357	12036844	25.3434	-2.81788	0.583525	-4.76272	1.91004e-06	0.00024352	NOCR	7
itf11g15860	GRAM domain-containing protein / ABA-responsive protein-related	Chr11	12386189	12387022	4.69027	-2.64513	0.646085	-3.77825	0.000157932	0.00434853	NOCR	7
itf11g15880	GRAM domain-containing protein / ABA-responsive protein-related	Chr11	12400630	12401274	7.45986	-2.16325	0.564371	-3.70662	0.000210041	0.00519397	NOCR	7
itf11g15920	GRAM domain-containing protein / ABA-responsive protein-related	Chr11	12428431	12429297	4.32265	-2.30374	0.613555	-3.4569	0.000546435	0.00979437	NOCR	7
itf11g15930	GRAM domain-containing protein / ABA-responsive protein-related	Chr11	12434003	12434692	18.445	-2.7152	0.52293	-5.06429	4.09934e-07	7.83968e-05	NOCR	7
itf11g15940	GRAM domain-containing protein / ABA-responsive protein-related	Chr11	12439670	12441290	29.8967	-3.185	0.522196	-5.9848	2.16655e-09	1.87832e-06	NOCR	7
itf11g15950	GRAM domain-containing protein / ABA-responsive protein-related	Chr11	12444724	12445264	20.0633	-3.58574	0.619132	-5.19807	2.0137e-07	5.036e-05	NOCR	7
itf11g16120	GRAM domain-containing protein / ABA-responsive protein-related	Chr11	12675908	12676547	18.266	-2.85759	0.531172	-5.23467	1.65281e-07	4.43174e-05	NOCR	7
itf11g16170	GRAM domain-containing protein / ABA-responsive protein-related	Chr11	12703248	12704118	3.37507	-2.28591	0.605507	-3.49	0.000483024	0.00905766	NOCR	7
itf11g17040	Kunitz family trypsin and protease inhibitor protein	Chr11	13985895	13987694	10.9222	-2.47709	0.729905	-3.8224	0.00013216	0.00388692	NOCR	7
itf11g17650	expansin-like B1	Chr11	14861206	14865929	43.1356	-2.25778	0.625611	-3.64706	0.000265254	0.00613243	NOCR	7
itf11g17940	GRAM domain-containing protein / ABA-responsive protein-related	Chr11	15164260	15165440	2.5198	-3.18016	0.748103	-3.77783	0.000158201	0.00434954	NOCR	7
itf11g21070	Transducin/WD40 repeat-like superfamily protein	Chr11	18325172	18327570	21.1164	2.00141	0.571787	3.50388	0.000458535	0.00874984
itf12g00500	Cytochrome P450 superfamily protein	Chr12	332722	334561	141.013	-2.32629	0.451881	-5.16059	2.46171e-07	5.66606e-05
itf12g00510	Cytochrome P450 superfamily protein	Chr12	339727	341564	157.447	-2.0232	0.41649	-4.86345	1.15357e-06	0.000171447
itf12g01020	Endoribonuclease/protein kinase IRE1-like	Chr12	617605	623797	28.3111	-2.16019	0.41125	-5.20381	1.95243e-07	4.96906e-05
itf12g02390	basic chitinase	Chr12	1399760	1401488	389.633	-3.91897	0.641493	-6.05971	1.36365e-09	1.36412e-06
itf12g02600	ascorbate peroxidase	Chr12	1542696	1546474	69.1843	-2.03359	0.409925	-4.95033	7.40893e-07	0.000121023
itf12g03720	cytochrome P450, family 735, subfamily A, polypeptide	Chr12	2229108	2229702	102.261	-2.11599	0.547191	-3.86797	0.000109747	0.00349925
itf12g03890	RING/FYVE/PHD zinc finger superfamily protein	Chr12	2338295	2340844	8.54139	-2.11309	0.553812	-3.66489	0.000247444	0.00585877
itf12g04340	Homeobox-leucine zipper protein family	Chr12	2581412	2582884	28.961	-4.68454	0.654381	-6.40214	1.53217e-10	2.84645e-07
itf12g05420	methyl esterase	Chr12	3325970	3328774	70.6399	3.13144	0.603826	5.17982	2.22101e-07	5.25148e-05
itf12g05870	brassinosteroid-6-oxidase	Chr12	3628355	3631948	16.7202	2.87353	0.556296	5.03057	4.89025e-07	9.04223e-05
itf12g06090	UDP-Glycosyltransferase superfamily protein	Chr12	3783058	3784758	97.7139	-2.42674	0.692283	-3.55554	0.000377197	0.0076525
itf12g07310	Pectin lyase-like superfamily protein	Chr12	4536492	4538675	1391.09	-2.25412	0.572809	-3.88307	0.000103147	0.00337029
itf12g08830	cytochrome P450, family 82, subfamily C, polypeptide	Chr12	5641502	5643797	235.493	2.42602	0.558562	4.36088	1.2954e-05	0.000837717
itf12g09020	HSP20-like chaperones superfamily protein	Chr12	5758728	5760704	28.4562	-2.36436	0.545764	-4.30423	1.67568e-05	0.000981595
itf12g09290	ribonuclease	Chr12	6036123	6037725	293.449	2.51198	0.530426	4.75077	2.02643e-06	0.000250978
itf12g09420	NAD(P)-binding Rossmann-fold superfamily protein	Chr12	6198859	6200027	20.0951	-2.95812	0.68137	-4.23053	2.33137e-05	0.00122698
itf12g09910	NAD(P)-binding Rossmann-fold superfamily protein	Chr12	6545393	6546600	76.2953	-3.18497	0.665222	-4.87827	1.07021e-06	0.000160897
itf12g09930	NAD(P)-binding Rossmann-fold superfamily protein	Chr12	6567213	6568428	5.12549	-3.19376	0.79664	-4.02214	5.76726e-05	0.00230202
itf12g10070	Major facilitator superfamily protein	Chr12	6679245	6683167	873.582	2.35739	0.614021	3.94998	7.81569e-05	0.00276946
itf12g10150	glutathione S-transferase TAU	Chr12	6779537	6779864	75.151	-2.09663	0.489153	-4.29212	1.76977e-05	0.00101836
itf12g11180	APRATAXIN-like	Chr12	8064689	8065443	9.45565	2.99794	0.734139	4.07287	4.64382e-05	0.00199969
itf12g11380	PYRIMIDINE	Chr12	8304885	8309598	1215.55	-3.12454	0.604964	-5.13617	2.80398e-07	6.18041e-05
itf12g12850	Tryptophan/tyrosine permease	Chr12	10001959	10003647	35.255	-2.1634	0.560267	-3.77836	0.000157863	0.00434853
itf12g14180	annexin	Chr12	11843676	11851796	51.814	-3.12392	0.579223	-5.36886	7.92347e-08	2.57602e-05
itf12g15530	Nucleoside transporter family protein	Chr12	14279752	14282271	13.6162	2.55425	0.719567	3.49289	0.000477821	0.00898063
itf12g15610	Leucine-rich repeat transmembrane protein kinase	Chr12	14450633	14454479	54.4214	-2.58676	0.663173	-3.9398	8.1551e-05	0.00285857
itf12g16510	Basic helix-loop-helix (bHLH) DNA-binding family protein	Chr12	15947348	15948934	7.6384	3.07502	0.701248	3.93143	8.44421e-05	0.00293225
itf12g16800	early nodulin-like protein	Chr12	16309208	16310177	166.451	2.79446	0.577178	4.90064	9.55258e-07	0.000147014
itf12g19680	xyloglucan endotransglucosylase/hydrolase	Chr12	19006124	19007990	38.3023	2.53602	0.674004	3.72974	0.00019168	0.00488811
itf12g19850	Pectin lyase-like superfamily protein	Chr12	19207482	19210129	119.887	-2.70691	0.72129	-4.34223	1.41042e-05	0.000880698
itf12g22290	nodulin MtN21 /EamA-like transporter family protein	Chr12	20969215	20971922	357.826	-3.80547	0.621298	-6.18015	6.40416e-10	8.76663e-07	NONC	7
itf12g22560	ENTH/VHS family protein	Chr12	21080119	21081395	233.112	-2.20024	0.50657	-4.33414	1.46333e-05	0.000899756	NONC	7
itf12g22810	Nucleotidyltransferase family protein	Chr12	21232397	21235309	98.9568	-2.27577	0.430209	-5.29324	1.20169e-07	3.47274e-05	NONC	7
itf12g23040	UDP-glucosyl transferase 85A2	Chr12	21361241	21363998	145.079	-2.23181	0.587213	-3.90244	9.52276e-05	0.00318352	NONC	7
itf12g23050	UDP-glucosyl transferase 85A2	Chr12	21364660	21366553	65.7784	-2.37035	0.58046	-4.13352	3.57245e-05	0.00168326	NONC	7
itf12g23820	Nuclear transport factor 2 (NTF2) family protein	Chr12	21871547	21875851	448.094	-3.10232	0.6733	-4.94377	7.66248e-07	0.000123785	NONC	7
itf12g25740	SLAC1 homologue	Chr12	23058963	23062232	1128.37	-2.14765	0.483821	-4.45785	8.27848e-06	0.000627741
itf12g25840	high affinity K+ transporter	Chr12	23109932	23114700	19.905	-2.5737	0.689081	-3.73705	0.000186195	0.00480431
itf12g25940	Nodulin MtN3 family protein	Chr12	23179603	23181318	76.5021	-3.14675	0.698623	-4.36255	1.28556e-05	0.000837717
itf13g00250	cytochrome P450, family 82, subfamily C, polypeptide	Chr13	164214	165853	92.3707	-2.72411	0.60193	-4.50449	6.65319e-06	0.000556408
itf13g00430	hypothetical protein	Chr13	308724	309024	2935.37	-2.77088	0.748573	-4.6672	3.05339e-06	0.000333401
itf13g01780	Cupredoxin superfamily protein	Chr13	1351450	1353035	358.007	-2.01432	0.577589	-3.51928	0.00043272	0.00839897
itf13g03240	osmotin	Chr13	2731786	2732515	35.17	-2.69771	0.59497	-4.54435	5.51041e-06	0.000487353	FYTHA	5
itf13g03260	osmotin	Chr13	2752084	2752824	198.288	-2.913	0.792075	-3.57755	0.000346833	0.00726747	FYTHA	5
itf13g03270	osmotin	Chr13	2757675	2758554	313.4	-3.60536	0.786157	-4.44377	8.83962e-06	0.000655013	FYTHA	5
itf13g03290	osmotin	Chr13	2771453	2772301	120.361	-3.60557	0.688223	-5.10815	3.25334e-07	6.71556e-05	FYTHA	5
itf13g03310	osmotin	Chr13	2783769	2784450	107.386	-3.7456	0.678125	-5.39996	6.66551e-08	2.29184e-05	FYTHA	5
itf13g03780	AGAMOUS-like	Chr13	3364546	3376287	71.2699	-4.06611	0.743454	-5.44564	5.16198e-08	1.83915e-05	FYTHA	5
itf13g04290	Predicted AT-hook DNA-binding family protein	Chr13	3869930	3870758	117.697	-2.19431	0.495896	-4.45498	8.39007e-06	0.000629666	FYTHA_TNR	5_8
itf13g04310	MATE efflux family protein	Chr13	3893277	3894887	69.9609	-2.10341	0.603079	-3.52742	0.000419624	0.00821436	FYTHA_TNR	5_8
itf13g04850	Glycosyl hydrolases family 32 protein	Chr13	4548439	4553310	25.8283	-2.72597	0.752429	-3.93566	8.29694e-05	0.0028927	FYTHA_TNR_NONC	5_8_8
itf13g05720	cytochrome P450, family 71, subfamily B, polypeptide	Chr13	6035810	6040381	175.591	-2.17566	0.592279	-3.77388	0.00016073	0.00439272	FYTHA_TNR_NONC	5_8_8
itf13g05950	nitrate transporter 1.5	Chr13	6642007	6643255	47.1005	-3.09315	0.63821	-4.82936	1.36974e-06	0.000192571	FYTHA_TNR_NONC	5_8_8
itf13g05960	nitrate transporter 1.5	Chr13	6644245	6650430	1265.17	-2.86148	0.561767	-5.12689	2.94572e-07	6.33184e-05	FYTHA_TNR_NONC	5_8_8
itf13g07510	Protein kinase superfamily protein	Chr13	8911094	8915521	266.532	-2.55255	0.606428	-4.29521	1.74529e-05	0.00100874	FYTHA_TNR_NONC	5_8_8
itf13g08280	Bifunctional inhibitor/lipid-transfer protein/seed storage 2S albumin superfamily protein	Chr13	9931613	9932069	1008.58	3.3243	0.601185	5.87684	4.1817e-09	2.93951e-06	FYTHA_TNR_NONC	5_8_8
itf13g08290	Bifunctional inhibitor/lipid-transfer protein/seed storage 2S albumin superfamily protein	Chr13	9935955	9936366	106.561	2.36875	0.510551	4.65623	3.22056e-06	0.000344187	FYTHA_TNR_NONC	5_8_8
itf13g08300	Bifunctional inhibitor/lipid-transfer protein/seed storage 2S albumin superfamily protein	Chr13	9957318	9958052	4213.56	3.38009	0.582428	6.11081	9.91249e-10	1.17188e-06	FYTHA_TNR_NONC	5_8_8
itf13g11710	alternative oxidase 1D	Chr13	14205794	14208309	52.8537	-3.48966	0.706856	-4.783	1.72698e-06	0.000224585	TNR_NONC	8_8
itf13g13170	purine permease	Chr13	15591445	15595603	497.252	-2.42133	0.363573	-6.65553	2.82285e-11	8.15773e-08	TNR_NONC	8_8
itf13g13400	cytochrome P450, family 82, subfamily C, polypeptide	Chr13	15800159	15801697	181.696	-2.25881	0.571508	-4.07918	4.51945e-05	0.00198291	TNR_NONC	8_8
itf13g13580	Thioredoxin superfamily protein	Chr13	15928979	15929270	179.179	2.31947	0.663573	3.45629	0.000547664	0.00979437	TNR_NONC	8_8
itf13g16280	Disease resistance protein (TIR-NBS-LRR class)	Chr13	18603611	18605959	23.4689	2.72964	0.776629	3.57596	0.000348941	0.0072955	TNR_RYTHA	8_2
itf13g16350	ATP-dependent protease La (LON) domain protein	Chr13	18651397	18654694	40.8416	2.1331	0.462781	4.56966	4.88507e-06	0.000450552	TNR_RYTHA	8_2
itf13g16360	beta-amylase	Chr13	18655270	18657810	20065.1	3.004	0.786176	5.11201	3.18757e-07	6.68593e-05	TNR_RYTHA	8_2
itf13g16930	somatic embryogenesis receptor-like kinase	Chr13	19058299	19060115	35.7819	-3.41488	0.659001	-5.07933	3.78776e-07	7.57815e-05	RYTHA	2
itf13g17040	SAUR-like auxin-responsive protein family	Chr13	19147532	19147955	34.9181	-2.42664	0.631479	-3.81209	0.000137795	0.00398213	RYTHA	2
itf13g17550	TRAF-like family protein	Chr13	19523728	19525976	15.1142	-2.07478	0.538103	-3.8102	0.000138853	0.00399913	RYTHA	2
itf13g18340	hypothetical protein	Chr13	20113893	20114160	59.188	-2.16226	0.62037	-3.5008	0.000463861	0.00879342	RYTHA	2
itf13g20850	UDP-Glycosyltransferase superfamily protein	Chr13	21518974	21520318	35.6987	-2.6814	0.640721	-4.1822	2.887e-05	0.00142753
itf13g20860	cellulose synthase like G1	Chr13	21524724	21529388	431.113	-3.28516	0.709058	-4.69456	2.67187e-06	0.000309584
itf13g21100	glutathione S-transferase TAU	Chr13	21681772	21683615	126.819	-2.59823	0.592999	-4.46787	7.90018e-06	0.000602568
itf13g21170	phosphate	Chr13	21734962	21746198	2630.89	-2.28817	0.539396	-4.27396	1.92034e-05	0.00106266
itf13g21200	conserved hypothetical protein	Chr13	21762591	21763374	650.416	-2.23238	0.447718	-5.00133	5.69357e-07	9.87228e-05
itf13g21250	Mannose-binding lectin superfamily protein	Chr13	21814633	21816891	1163.46	2.25994	0.524234	4.30264	1.68773e-05	0.000986432
itf13g21330	Mannose-binding lectin superfamily protein	Chr13	21853041	21856072	462.76	-2.67922	0.763195	-4.75927	1.94297e-06	0.000245314
itf14g00170	Plant protein of unknown function domain containing protein	Chr14	130475	133028	547.073	2.48201	0.633652	4.17535	2.97526e-05	0.00146838
itf14g00620	oligopeptide transporter	Chr14	455236	460576	16.6024	-2.65755	0.519267	-4.78871	1.67856e-06	0.000220493
itf14g01060	nodulin MtN21 /EamA-like transporter family protein	Chr14	866930	871581	142.384	-2.71696	0.535836	-5.072	3.93666e-07	7.68384e-05
itf14g02050	Disease resistance protein (CC-NBS-LRR class) family	Chr14	1734824	1741132	39.2897	-2.01899	0.495494	-4.05771	4.9557e-05	0.00208564
itf14g02060	NB-ARC domain-containing disease resistance protein	Chr14	1741557	1743616	20.616	2.16237	0.472528	4.53136	5.86038e-06	0.000505388
itf14g02650	cytochrome P450, family 709, subfamily B, polypeptide	Chr14	2310602	2313703	39.4737	-2.38862	0.711821	-3.65042	0.000261812	0.00606904
itf14g03110	Glycosyl transferase, family	Chr14	2640348	2647968	92.694	2.64088	0.645334	4.06157	4.8743e-05	0.00206698
itf14g05210	Phototropic-responsive NPH3 family protein	Chr14	4153605	4156755	75.4916	2.44728	0.572027	4.27812	1.88475e-05	0.0010542
itf14g06590	flowering promoting factor	Chr14	5271559	5271883	10.5505	-3.1307	0.807367	-4.27379	1.92177e-05	0.00106266
itf14g11730	cytochrome P450, family 94, subfamily B, polypeptide	Chr14	11335052	11336826	83.3541	2.50611	0.662191	3.91674	8.97541e-05	0.00305106	TNR	9
itf14g12380	NAD(P)-binding Rossmann-fold superfamily protein	Chr14	12246805	12248120	72.339	2.9712	0.627272	4.8786	1.06843e-06	0.000160897	TNR	9
itf14g13440	hydroxycinnamoyl-CoA shikimate/quinate hydroxycinnamoyl transferase	Chr14	13967826	13969349	62.7905	-2.32916	0.545518	-4.2764	1.89944e-05	0.0010584	TNR	9
itf14g15330	Metallothionein domain containing protein	Chr14	16015398	16016603	94.0582	-2.66121	0.51078	-5.21798	1.8089e-07	4.65818e-05
itf14g17250	cytochrome P450, family 82, subfamily C, polypeptide	Chr14	17294573	17297896	9.91864	-2.80581	0.718676	-3.70648	0.000210162	0.00519397
itf14g17280	ER lumen protein retaining receptor family protein	Chr14	17308640	17310857	62.7217	-2.16903	0.559225	-3.87338	0.000107336	0.0034717
itf14g17990	Protein of unknown function (DUF640)	Chr14	17751411	17752756	67.2041	2.74351	0.649023	4.18709	2.82548e-05	0.00140512
itf14g18850	aluminum-activated, malate transporter	Chr14	18325079	18328652	76.5939	-4.15216	0.658104	-6.18526	6.2e-10	8.76663e-07
itf14g18990	oxidoreductase, 2OG-Fe(II) oxygenase family protein	Chr14	18412110	18418333	242.828	-2.31053	0.361992	-6.3739	1.84284e-10	3.19537e-07
itf15g00360	hypothetical protein	Chr15	170712	171516	16.7138	2.47136	0.535073	4.48374	7.33467e-06	0.000579841	RYTHA_CYTHA_CI	3_1_1
itf15g00450	xyloglucan endotransglucosylase/hydrolase	Chr15	222338	224463	343.323	2.95464	0.621663	4.9191	8.69448e-07	0.000137887	RYTHA_CYTHA_CI	3_1_1
itf15g00830	Exostosin family protein	Chr15	418361	421851	154.057	-2.32928	0.636737	-3.65744	0.000254749	0.00595842	RYTHA_CYTHA_CI	3_1_1
itf15g00930	cytochrome P450, family 76, subfamily G, polypeptide	Chr15	472728	474447	28.1187	2.31156	0.496991	4.59427	4.3426e-06	0.000427828	RYTHA_CYTHA_CI	3_1_1
itf15g01100	Duplicated homeodomain-like superfamily protein	Chr15	570049	573024	265.577	2.29766	0.588302	3.9209	8.82189e-05	0.00302304	RYTHA_CYTHA_CI	3_1_1
itf15g01410	myb-related protein	Chr15	785824	788601	322.527	-2.01789	0.442394	-4.54578	5.47312e-06	0.000487353	CYTHA_CI	1_1
itf15g01510	cell wall invertase	Chr15	839182	843039	51.6424	-2.74137	0.667246	-4.22222	2.41905e-05	0.00125834	CYTHA_CI	1_1
itf15g01530	Long-chain fatty alcohol dehydrogenase family protein	Chr15	847978	853257	18.3372	-2.34657	0.584476	-3.95729	7.58043e-05	0.00273074	CYTHA_CI	1_1
itf15g02830	hypothetical protein	Chr15	1684298	1686987	15.8507	2.25248	0.640738	3.48036	0.000500749	0.00930284	CYTHA_CI	1_1
itf15g03020	cytochrome P450, family 712, subfamily A, polypeptide	Chr15	1807588	1809235	42.483	-2.34818	0.570568	-4.15693	3.22555e-05	0.00155646	CYTHA_CI	1_1
itf15g04170	S-adenosyl-L-methionine-dependent methyltransferases superfamily protein	Chr15	2472867	2474565	96.9633	-2.69918	0.60015	-4.46565	7.98262e-06	0.000607076	NONC	9
itf15g04190	S-adenosyl-L-methionine-dependent methyltransferases superfamily protein	Chr15	2477456	2478922	76.0241	-2.95995	0.561763	-5.30023	1.15654e-07	3.37983e-05	NONC	9
itf15g04410	basic helix-loop-helix (bHLH) DNA-binding superfamily protein	Chr15	2598209	2600300	295.412	-2.42654	0.599858	-4.0755	4.59157e-05	0.00199969	NONC	9
itf15g05610	Exostosin family protein	Chr15	3381285	3386544	6.23019	-2.3679	0.773832	-3.46343	0.000533338	0.0096897	NONC	9
itf15g06500	Tautomerase/MIF superfamily protein	Chr15	4086039	4087421	86.9212	-2.41495	0.584029	-4.1504	3.31902e-05	0.00159564	NONC	9
itf15g06510	Tautomerase/MIF superfamily protein	Chr15	4090690	4092193	31.5878	-2.7877	0.594034	-4.63341	3.59692e-06	0.000368316	NONC	9
itf15g06720	GRAS family transcription factor	Chr15	4225396	4226896	57.0327	-2.69874	0.615362	-4.3192	1.56596e-05	0.00094182	NONC	9
itf15g07550	Protein of unknown function (DUF674)	Chr15	4831152	4832672	32.9973	2.30927	0.609535	3.8441	0.000120996	0.00368723	NONC_TNR	9_10
itf15g07630	laccase	Chr15	4870265	4873436	40.8353	-2.05414	0.7852	-3.56597	0.000362506	0.0074563	NONC_TNR	9_10
itf15g07720	glutathione S-transferase tau	Chr15	4937067	4937981	36.8997	-2.69994	0.675798	-3.90649	9.3648e-05	0.00314283	NONC_TNR	9_10
itf15g09470	Mitochondrial substrate carrier family protein	Chr15	6274640	6281095	10.9788	-2.41084	0.624947	-3.7255	0.000194927	0.00495103	NONC_TNR_NCYTHA	9_10_5
itf15g09740	O-Glycosyl hydrolases family 17 protein	Chr15	6588147	6590684	515.893	2.18623	0.583364	3.84766	0.000119252	0.00366621	NONC_TNR_NCYTHA	9_10_5
itf15g11600	basic helix-loop-helix (bHLH) DNA-binding superfamily protein	Chr15	8390827	8396075	39.4235	2.94792	0.734808	4.10554	4.03367e-05	0.00184392	NONC_TNR_NCYTHA	9_10_5
itf15g12000	long-chain acyl-CoA synthetase	Chr15	8762974	8774366	390.29	-2.11214	0.367209	-5.75484	8.67253e-09	4.79923e-06	NONC_TNR_NCYTHA	9_10_5
itf15g13770	CAP (Cysteine-rich secretory proteins, Antigen 5, and Pathogenesis-related 1 protein) superfamily protein	Chr15	10821857	10822343	77.7888	-3.10668	0.538424	-5.76497	8.16701e-09	4.61774e-06	NONC_TNR_NCYTHA	9_10_5
itf15g14830	Pectinacetylesterase family protein	Chr15	12119926	12125801	82.6131	2.58851	0.599718	4.35741	1.31613e-05	0.000845214	NONC_TNR_NCYTHA	9_10_5
itf15g15380	Leucine-rich repeat protein kinase family protein	Chr15	12915935	12924850	238.861	-2.09629	0.436091	-4.81329	1.48467e-06	0.000202172	NONC_TNR_NCYTHA	9_10_5
itf15g19710	plant natriuretic peptide A	Chr15	18705555	18706102	13.6701	-2.3893	0.758562	-3.51239	0.000444095	0.00853693
itf15g20820	gamma vacuolar processing enzyme	Chr15	19925444	19930032	6128.8	-2.58113	0.400169	-6.45394	1.0898e-10	2.18035e-07
itf15g21400	carotenoid cleavage dioxygenase	Chr15	20443202	20448549	291.168	3.43317	0.671697	5.18145	2.20169e-07	5.25148e-05
itf15g21470	nine-cis-epoxycarotenoid dioxygenase	Chr15	20570892	20580704	16.7802	3.02227	0.752369	4.0791	4.52099e-05	0.00198291
itf15g22080	potassium channel in Arabidopsis thaliana	Chr15	21141130	21146144	112.84	-2.23372	0.515668	-4.32374	1.53404e-05	0.000927879
itf15g22840	cytochrome P450, family 71, subfamily B, polypeptide	Chr15	21712591	21720239	7.85393	-2.21296	0.772679	-3.44528	0.000570466	0.00996726
itf15g22890	cytochrome P450, family 71, subfamily B, polypeptide	Chr15	21782912	21786836	18.6806	-2.77728	0.727802	-3.78279	0.000155078	0.00431785
itf15g22940	cytochrome P450, family 71, subfamily B, polypeptide	Chr15	21824686	21826836	67.689	-4.21355	0.653597	-5.99508	2.03386e-09	1.82409e-06
itf15g22950	cytochrome P450, family 71, subfamily B, polypeptide	Chr15	21833566	21836216	154.912	-2.17376	0.462963	-4.70785	2.50344e-06	0.000297315
itf15g22970	terpene synthase	Chr15	21853757	21856114	188.796	-4.40987	0.652142	-6.78494	1.16132e-11	5.03411e-08
itf15g22980	cytochrome P450, family 71, subfamily B, polypeptide	Chr15	21874815	21878018	135.654	-3.90127	0.671201	-6.03437	1.59585e-09	1.48237e-06
itf15g22990	terpene synthase	Chr15	21890529	21893034	203.475	-2.99022	0.676301	-4.80108	1.57811e-06	0.000211573
itf15g23000	terpene synthase	Chr15	21901224	21903550	306.888	-3.10253	0.717612	-5.10663	3.27947e-07	6.7162e-05

## Sheet: B_40DAT_SR_vs_B_40DAT_FR
Gene	Functional Annotation	Chr	Start	Stop	baseMean	log2FoldChange	lfcSE	stat	pvalue	padj	Trait	QTL_in_Trait_Order
itf00g00070	NB-ARC domain-containing disease resistance protein	Chr00	76409	79837	6.75719	-2.16691	0.437366	-4.79599	1.6187e-06	2.5838e-05
itf00g10770	Disease resistance protein (TIR-NBS-LRR class)	Chr00	18208031	18210667	43.272	2.52898	0.481565	5.21284	1.85973e-07	4.74168e-06
itf00g11260	hypothetical protein	Chr00	19046616	19047811	43.1607	3.17833	0.63979	4.79842	1.59919e-06	2.56034e-05
itf00g13410	Kunitz family trypsin and protease inhibitor protein	Chr00	22574571	22576502	12.2327	2.37497	0.654779	3.53236	0.000411865	0.00217314
itf00g13890	RNA-binding (RRM/RBD/RNP motifs) family protein	Chr00	23216541	23218424	11.1609	3.92814	0.777076	4.29487	1.74798e-05	0.000169588
itf00g16710	F-box family protein	Chr00	27977425	27979294	11.3767	-2.34536	0.523479	-4.38043	1.18444e-05	0.000123715
itf00g19540	Protein kinase family protein with leucine-rich repeat domain	Chr00	32477188	32479276	52.437	-2.28227	0.335482	-6.77619	1.2339e-11	2.81835e-09
itf00g20050	NB-ARC domain-containing disease resistance protein	Chr00	33384306	33388928	3.06667	-2.66042	0.614161	-3.96463	7.35111e-05	0.00054062
itf00g20060	NB-ARC domain-containing disease resistance protein	Chr00	33411617	33414872	58.6118	-3.17725	0.270596	-11.6188	3.30693e-31	8.79413e-27
itf00g21260	monooxygenase	Chr00	35326493	35329462	280.341	-2.54624	0.388601	-6.5592	5.40983e-11	8.93562e-09
itf00g21310	indole-3-acetate beta-D-glucosyltransferase	Chr00	35400063	35401895	701.103	-3.74711	0.588965	-6.37318	1.85146e-10	2.17858e-08
itf00g22280	lipid transfer protein	Chr00	36806764	36808413	4.44799	-2.37743	0.796465	-3.23902	0.00119941	0.00514367
itf00g24410	conserved hypothetical protein	Chr00	40299052	40299815	44.5121	2.21304	0.438176	5.02957	4.91574e-07	1.0079e-05
itf00g25230	MYB-like	Chr00	41518969	41520177	19.8142	-3.1388	0.745309	-4.44873	8.63793e-06	9.63793e-05
itf00g25340	expansin A8	Chr00	41679949	41681672	112.193	2.41096	0.514106	4.64033	3.47848e-06	4.70353e-05
itf00g25380	MATE efflux family protein	Chr00	41720581	41723532	204.324	-3.28475	0.748126	-4.35759	1.31504e-05	0.000135044
itf00g25610	Wound-responsive family protein	Chr00	42045156	42045453	44.5227	2.91354	0.686795	3.925	8.67284e-05	0.00062183
itf00g26260	alpha/beta-Hydrolases superfamily protein	Chr00	42873072	42876454	21.4972	-3.53226	0.735539	-4.6502	3.31613e-06	4.54567e-05
itf00g26760	Calcium-dependent lipid-binding (CaLB domain) family protein	Chr00	43481805	43486633	142.389	2.1302	0.443197	4.82129	1.4263e-06	2.33029e-05
itf00g27030	Chalcone and stilbene synthase family protein	Chr00	43924199	43925944	2.77791	-2.64123	0.700348	-3.0741	0.00211141	0.00811282
itf00g27200	arabinose kinase	Chr00	44258463	44260257	23.5509	-2.26422	0.626716	-3.6448	0.000267596	0.00153697
itf00g28230	hypothetical protein	Chr00	45842791	45843088	4.57578	3.5373	0.801896	4.24564	2.1797e-05	0.000203528
itf00g28920	Kunitz family trypsin and protease inhibitor protein	Chr00	46775575	46776555	79.5809	-2.13649	0.363876	-5.83643	5.33324e-09	2.94246e-07
itf00g28970	SLAC1 homologue	Chr00	46853654	46857497	17.3965	-2.56023	0.80843	-3.28404	0.00102332	0.00452046
itf00g29170	flowering promoting factor	Chr00	47036798	47037122	77.8048	-3.08344	0.793905	-4.83081	1.35979e-06	2.24601e-05
itf00g30170	Leucine-rich repeat transmembrane protein kinase	Chr00	48026764	48028162	6.16746	2.3214	0.697384	3.17315	0.00150793	0.00617852
itf00g30380	Serine carboxypeptidase S28 family protein	Chr00	48175888	48179387	2.5934	-3.71932	0.803574	-3.83497	0.000125581	0.000833647
itf00g30790	ribonuclease	Chr00	48535169	48535829	52.8166	3.94656	0.666701	5.54569	2.92795e-08	1.07582e-06
itf00g32090	elicitor-activated gene 3-2	Chr00	49978888	49980808	1167.84	-2.00179	0.390268	-5.13293	2.8526e-07	6.58501e-06
itf00g32100	elicitor-activated gene 3-2	Chr00	49984451	49986503	8.32142	3.39652	0.636094	4.91139	9.04347e-07	1.64496e-05
itf00g32400	UDP-Glycosyltransferase superfamily protein	Chr00	50302726	50304399	4.52024	2.61148	0.701164	3.47397	0.000512819	0.00259513
itf00g32850	Calcium-binding EF-hand family protein	Chr00	50827365	50827919	7.84847	3.09723	0.642969	4.52292	6.09921e-06	7.30563e-05
itf00g33250	DNAJ heat shock family protein	Chr00	51158872	51160238	8.78295	2.53252	0.638554	3.83997	0.000123047	0.000820304
itf00g33550	Disease resistance protein (TIR-NBS-LRR class) family	Chr00	51427307	51430487	263.375	2.22097	0.430124	5.17576	2.26982e-07	5.52797e-06
itf00g34360	Kinase interacting (KIP1-like) family protein	Chr00	52182814	52183354	6.34775	-3.69286	0.656424	-4.89954	9.60633e-07	1.72565e-05
itf00g35170	conserved hypothetical protein	Chr00	52840802	52841662	7.53828	2.43332	0.61248	3.81546	0.000135931	0.000885966
itf00g36200	1-aminocyclopropane-1-carboxylic acid (acc) synthase	Chr00	53747913	53749171	188.154	-2.77586	0.543365	-5.14357	2.69573e-07	6.30639e-06
itf00g37950	conserved hypothetical protein	Chr00	55306550	55306835	5.30085	-2.46955	0.635722	-3.31682	0.000910478	0.00411844
itf00g39040	cryptochrome	Chr00	56251438	56254147	8.29836	2.19765	0.570364	3.73545	0.00018738	0.00114604
itf00g39520	SAUR-like auxin-responsive protein family	Chr00	56770494	56771090	6.30391	2.74615	0.70059	3.69328	0.000221376	0.00131525
itf00g39550	putative recombination initiation defect	Chr00	56784474	56784954	1.34385	2.71593	0.786519	3.01924	0.00253411	0.0093975
itf00g40110	fatA acyl-ACP thioesterase	Chr00	57322714	57325644	6.44412	2.17267	0.613602	3.40363	0.000664971	0.00318508
itf00g41640	serine carboxypeptidase-like	Chr00	59375291	59376245	23.4848	2.12139	0.673685	3.13392	0.00172486	0.00688442
itf00g42000	inositol transporter	Chr00	59819189	59819609	90.8534	-2.42357	0.32948	-7.33773	2.17244e-13	1.01354e-10
itf00g42450	conserved hypothetical protein	Chr00	60300376	60302180	280.208	-2.14003	0.519751	-4.12472	3.71179e-05	0.000312564
itf00g42590	Wound-responsive family protein	Chr00	60552001	60552605	27.8177	2.73646	0.551299	4.87484	1.08895e-06	1.89643e-05
itf00g43360	NAD(P)-binding Rossmann-fold superfamily protein	Chr00	61720215	61721334	4.18894	2.31217	0.632475	3.44264	0.00057607	0.00285331
itf00g50700	glutathione S-transferase TAU	Chr00	71442371	71443484	81.4015	-3.99462	0.617759	-6.43563	1.22965e-10	1.65846e-08
itf00g51910	conserved hypothetical protein	Chr00	72745918	72746191	49.3137	-2.94082	0.698944	-4.21282	2.522e-05	0.000229684
itf00g53770	hypothetical protein	Chr00	75177772	75178301	135.422	3.05641	0.471858	6.43024	1.27399e-10	1.68554e-08
itf00g54080	Protein of unknown function (DUF_B2219) domain containing protein	Chr00	75609739	75610774	17.607	-2.1596	0.584516	-3.68282	0.000230664	0.00136373
itf00g57400	heavy metal atpase	Chr00	80109829	80110820	36.1659	-2.92733	0.438203	-6.60981	3.84819e-11	6.8789e-09
itf00g57540	myb domain protein	Chr00	80297411	80298528	366.985	-2.08519	0.604183	-3.27155	0.00106958	0.00469054
itf00g58110	ethylene-responsive element binding factor	Chr00	80916695	80917466	15.4886	-3.16177	0.717488	-4.06554	4.79221e-05	0.0003827
itf00g58700	cytochrome P450, family 72, subfamily A, polypeptide	Chr00	81800471	81800801	84.8375	-2.28808	0.470321	-4.86086	1.16875e-06	1.99618e-05
itf00g58750	Disease resistance-responsive (dirigent-like protein) family protein	Chr00	81825367	81825952	17.0347	-2.43112	0.620638	-3.82343	0.00013161	0.000865457
itf00g62540	hypothetical protein	Chr00	87217463	87217739	3.8634	2.71742	0.745371	3.23214	0.00122868	0.00524047
itf00g69230	delta(3), delta(2)-enoyl CoA isomerase	Chr00	97276912	97277209	13.5987	-2.72219	0.508144	-5.10845	3.24818e-07	7.25262e-06
itf00g73410	NIN like protein	Chr00	105279002	105279314	14.8654	2.02582	0.459744	4.34786	1.37474e-05	0.000139963
itf01g00020	phospholipase D delta	Chr01	2893	7353	6.53314	2.77793	0.629984	4.0721	4.65917e-05	0.000373534
itf01g00250	Uridine diphosphate glycosyltransferase 74E2	Chr01	148969	150616	138.327	-2.7956	0.580111	-4.82125	1.42658e-06	2.33029e-05
itf01g00440	conserved hypothetical protein	Chr01	219351	220529	105.909	3.48713	0.503694	6.83111	8.42605e-12	2.01868e-09
itf01g00680	Protein E6	Chr01	332381	333940	305.557	4.08966	0.502613	8.06227	7.48917e-16	1.17153e-12
itf01g00850	ABC-2 type transporter family protein	Chr01	519628	521443	6.21423	-3.09119	0.71534	-3.75767	0.0001715	0.00106833
itf01g01240	CAP (Cysteine-rich secretory proteins, Antigen 5, and Pathogenesis-related 1 protein) superfamily protein	Chr01	718172	718724	301.804	2.21385	0.565058	3.8701	0.00010879	0.000744095
itf01g01830	kunitz trypsin inhibitor	Chr01	1045869	1046754	345.631	3.18546	0.658662	4.97402	6.5578e-07	1.27666e-05
itf01g01850	kunitz trypsin inhibitor	Chr01	1064339	1065218	17.5846	2.38708	0.679278	3.51087	0.000446636	0.0023189
itf01g01860	kunitz trypsin inhibitor	Chr01	1076454	1077369	178016	4.31255	0.664937	6.64863	2.9583e-11	5.65973e-09
itf01g01870	Kunitz family trypsin and protease inhibitor protein	Chr01	1087689	1090527	81851.3	3.78563	0.679175	5.67647	1.37503e-08	6.0236e-07
itf01g01890	kunitz trypsin inhibitor	Chr01	1102939	1103996	125842	4.44671	0.678069	6.74866	1.49217e-11	3.30676e-09
itf01g02100	actin-11	Chr01	1256414	1261187	117.852	2.19296	0.438538	4.99049	6.02265e-07	1.18549e-05
itf01g02410	Phosphatidylinositol-4-phosphate 5-kinase family protein	Chr01	1425188	1430281	345.862	-2.65775	0.417566	-6.36935	1.89835e-10	2.20588e-08
itf01g02830	SKU5 similar	Chr01	1697784	1702318	47.1964	3.22664	0.499069	6.36267	1.98277e-10	2.25333e-08
itf01g03040	Bifunctional inhibitor/lipid-transfer protein/seed storage 2S albumin superfamily protein	Chr01	1832315	1833845	47.9354	3.90732	0.737464	5.36484	8.10214e-08	2.40469e-06
itf01g03210	fumarylacetoacetase, putative	Chr01	1908104	1910883	172.18	2.4416	0.544392	4.4596	8.21127e-06	9.25639e-05
itf01g03240	acyl-CoA sterol acyl transferase	Chr01	1915091	1917488	4.99923	-2.18943	0.694286	-3.00972	0.00261485	0.00962799
itf01g03300	hypothetical protein	Chr01	1952339	1954040	1674.8	3.41765	0.473132	7.20206	5.93117e-13	2.18046e-10
itf01g03460	MATE efflux family protein	Chr01	2061546	2068949	17.5685	2.07939	0.521719	3.93	8.49445e-05	0.000610357
itf01g03570	beta-glucosidase	Chr01	2160199	2164632	164.501	2.01227	0.580046	3.45442	0.00055148	0.00274995
itf01g03580	beta-glucosidase	Chr01	2167688	2172403	190.859	2.42693	0.546716	4.39339	1.11595e-05	0.000118069
itf01g03650	xyloglucan endotransglucosylase/hydrolase	Chr01	2234982	2237324	362.913	2.31057	0.410849	5.61108	2.01067e-08	8.06481e-07
itf01g03850	cysteine-rich RLK (RECEPTOR-like protein kinase)	Chr01	2427660	2431223	50.2763	2.45502	0.707445	3.69296	0.00022166	0.00131635
itf01g04060	Protein of unknown function, DUF538	Chr01	2548849	2550433	110.866	2.39917	0.415262	5.75577	8.62482e-09	4.2871e-07
itf01g05720	Xanthine/uracil permease family protein	Chr01	3880854	3885334	247.281	2.35232	0.39906	5.8785	4.14002e-09	2.42501e-07
itf01g05730	Homeodomain-like superfamily protein	Chr01	3908736	3914380	78.6759	-3.40254	0.648329	-5.27525	1.32575e-07	3.57926e-06
itf01g05740	Protein of unknown function (DUF688)	Chr01	3915162	3918478	394.51	2.41608	0.434365	5.55393	2.79318e-08	1.03887e-06
itf01g05760	xylem bark cysteine peptidase	Chr01	3942917	3946437	3.42315	3.18791	0.798165	3.25367	0.00113923	0.00492609
itf01g05850	senescence-associated gene	Chr01	4039259	4041447	5.42931	-3.47909	0.704774	-4.1628	3.14366e-05	0.00027336
itf01g06000	alpha/beta-Hydrolases superfamily protein	Chr01	4165094	4166768	47.757	-2.19758	0.712328	-3.44113	0.00057929	0.0028646
itf01g06020	alpha/beta-Hydrolases superfamily protein	Chr01	4203482	4204752	82.6966	-3.63521	0.667069	-5.49644	3.87543e-08	1.34542e-06
itf01g06050	alpha/beta-Hydrolases superfamily protein	Chr01	4223427	4224819	148.285	-2.14247	0.752332	-3.53095	0.000414064	0.00218173
itf01g06120	RAB GTPase homolog A1D	Chr01	4277114	4278912	54.2042	2.94501	0.512197	5.69827	1.21027e-08	5.53001e-07
itf01g06340	Leucine-rich repeat transmembrane protein kinase	Chr01	4490235	4496057	24.3342	2.33275	0.488538	4.72686	2.28018e-06	3.38943e-05
itf01g08190	ABC-2 type transporter family protein	Chr01	6777610	6783393	239.698	2.23936	0.559325	4.00958	6.08265e-05	0.000464456
itf01g09230	hypothetical protein	Chr01	8241659	8241983	5.32585	-2.11377	0.56022	-3.5945	0.00032501	0.001798
itf01g09710	SAUR-like auxin-responsive protein family	Chr01	8931899	8937008	6.47763	2.97258	0.682687	3.9102	9.22209e-05	0.000652068
itf01g09890	2-oxoglutarate (2OG) and Fe(II)-dependent oxygenase superfamily protein	Chr01	9153010	9157171	332.18	-2.0131	0.440019	-4.57744	4.70695e-06	5.9549e-05
itf01g09950	2-oxoglutarate (2OG) and Fe(II)-dependent oxygenase superfamily protein	Chr01	9285159	9286931	344.503	-2.14223	0.434217	-4.93445	8.03763e-07	1.49475e-05
itf01g10060	2-oxoglutarate (2OG) and Fe(II)-dependent oxygenase superfamily protein	Chr01	9363004	9366583	101.057	3.01745	0.584134	5.18534	2.15625e-07	5.30446e-06
itf01g10570	Nucleotide-diphospho-sugar transferases superfamily protein	Chr01	10045718	10052834	9.48078	2.24371	0.671302	3.22798	0.00124666	0.00529507
itf01g11600	alpha carbonic anhydrase	Chr01	11521815	11523663	4.58142	-3.60957	0.752188	-4.00724	6.14321e-05	0.00046783
itf01g12580	Bifunctional inhibitor/lipid-transfer protein/seed storage 2S albumin superfamily protein	Chr01	12754920	12756113	343.699	-3.8239	0.673059	-5.82526	5.70245e-09	3.12027e-07
itf01g13680	hypothetical protein	Chr01	14190687	14191257	29.0183	3.49307	0.564879	5.98457	2.16957e-09	1.45848e-07
itf01g14720	Protein of unknown function (DUF1677)	Chr01	15661379	15662061	26.4267	2.7879	0.572526	4.79521	1.62505e-06	2.59239e-05
itf01g15490	Protein of unknown function, DUF642	Chr01	16432485	16436970	143.538	3.55717	0.701531	4.9507	7.3947e-07	1.39919e-05	NONC	1
itf01g15830	ARM repeat superfamily protein	Chr01	16836134	16838359	228.538	2.54647	0.372345	6.82945	8.52387e-12	2.02389e-09	NONC	1
itf01g15860	Integrase-type DNA-binding superfamily protein	Chr01	16910842	16911898	19.4329	3.05804	0.657509	4.40361	1.06465e-05	0.000113795	NONC	1
itf01g16400	Ankyrin repeat family protein	Chr01	17590551	17594832	30.1249	-4.08695	0.703032	-5.43957	5.34086e-08	1.7329e-06	NONC	1
itf01g16460	photosystem II subunit X	Chr01	17650640	17650988	19.4766	2.37188	0.695406	3.47503	0.000510788	0.00258534	NONC	1
itf01g17630	glutathione S-transferase zeta	Chr01	18969131	18977064	10.1186	2.06542	0.431667	4.67297	2.96881e-06	4.16621e-05	NONC	1
itf01g18860	ankyrin	Chr01	20000447	20003786	12.5932	-2.49753	0.652107	-3.72872	0.000192454	0.00117196	NONC_NCYTHA	1_1
itf01g19100	Sterile alpha motif (SAM) domain-containing protein	Chr01	20195523	20196630	5.56636	2.50433	0.726785	3.27588	0.00105332	0.00462915	NONC_NCYTHA	1_1
itf01g19120	hypothetical protein	Chr01	20200994	20204410	3.86865	2.16667	0.654578	3.06968	0.00214287	0.0082064	NONC_NCYTHA	1_1
itf01g19340	COP1-interacting protein	Chr01	20420269	20425525	37.388	2.19031	0.67055	3.26999	0.00107551	0.00471111	NONC_NCYTHA	1_1
itf01g19690	Disease resistance protein (CC-NBS-LRR class) family	Chr01	20708616	20711393	150.523	-2.43269	0.45174	-5.37915	7.48368e-08	2.26925e-06	NONC_NCYTHA_TNR	1_1_1
itf01g19700	Leucine-rich receptor-like protein kinase family protein	Chr01	20714807	20717878	131.805	-2.54749	0.397739	-6.38498	1.7142e-10	2.08281e-08	NONC_NCYTHA_TNR	1_1_1
itf01g19720	Leucine-rich receptor-like protein kinase family protein	Chr01	20719858	20721547	7.9045	-2.42943	0.493758	-4.73926	2.14495e-06	3.23543e-05	NONC_NCYTHA_TNR	1_1_1
itf01g19910	Nucleic acid-binding, OB-fold-like protein	Chr01	20897919	20899942	6.94972	2.82648	0.624035	4.23886	2.24659e-05	0.000208384	NONC_NCYTHA_TNR	1_1_1
itf01g20130	NB-ARC domain-containing disease resistance protein	Chr01	21077356	21080255	139.656	-2.12649	0.518609	-4.09377	4.24417e-05	0.000347064	NONC_NCYTHA_TNR	1_1_1
itf01g20190	Plant protein of unknown function (DUF828)	Chr01	21150220	21152787	19.1255	2.09407	0.661677	3.1502	0.0016316	0.00657866	NONC_NCYTHA_TNR	1_1_1
itf01g20230	tetratricopetide-repeat thioredoxin-like	Chr01	21209181	21213733	113.05	2.14689	0.405732	5.27346	1.33879e-07	3.60348e-06	NONC_NCYTHA_TNR	1_1_1
itf01g20300	Protein of unknown function (DUF640)	Chr01	21270258	21270792	98.1311	2.3691	0.515314	4.57196	4.83189e-06	6.07483e-05	NONC_NCYTHA_TNR	1_1_1
itf01g20990	gibberellin 2-oxidase	Chr01	22005740	22007293	4037.15	-2.05166	0.460554	-4.44645	8.72991e-06	9.71007e-05	NONC_NCYTHA_TNR	1_1_1
itf01g21000	Protein of unknown function (DUF_B2219) domain containing protein	Chr01	22032159	22034787	487.132	2.24441	0.631215	3.60014	0.000318043	0.0017646	NONC_NCYTHA_TNR	1_1_1
itf01g21240	glutathione S-transferase TAU	Chr01	22234444	22235193	120.171	-3.21643	0.513926	-6.24025	4.36878e-10	4.20938e-08	NONC_NCYTHA_TNR	1_1_1
itf01g21310	glutathione S-transferase TAU	Chr01	22261459	22262543	677.604	2.5088	0.576957	4.31905	1.56704e-05	0.000155498	NONC_NCYTHA_TNR	1_1_1
itf01g21670	glycerol-3-phosphate acyltransferase	Chr01	22483916	22487244	119.554	-3.04281	0.655225	-4.69799	2.62732e-06	3.77258e-05	NONC_NCYTHA_TNR	1_1_1
itf01g22350	abscisic acid responsive elements-binding factor	Chr01	23039309	23041748	1777.3	-2.04075	0.316211	-6.45831	1.05876e-10	1.48971e-08	NONC_NCYTHA_TNR	1_1_1
itf01g22360	hypothetical protein	Chr01	23041791	23043097	28.2863	-2.40196	0.387678	-6.11528	9.63875e-10	7.98515e-08	NONC_NCYTHA	1_1
itf01g22500	protein disulfide isomerases	Chr01	23129130	23130856	196.486	-2.28998	0.467046	-4.88602	1.02896e-06	1.81815e-05	NONC_NCYTHA	1_1
itf01g22660	serine carboxypeptidase-like	Chr01	23272217	23275085	206.743	2.71958	0.503719	5.35743	8.44161e-08	2.49431e-06	NONC_NCYTHA	1_1
itf01g22940	Transducin/WD40 repeat-like superfamily protein	Chr01	23495736	23497677	172.808	-2.29655	0.455792	-5.02821	4.95084e-07	1.01353e-05
itf01g23130	conserved hypothetical protein	Chr01	23666147	23667049	27.7987	-2.19462	0.442757	-4.92079	8.6196e-07	1.57757e-05
itf01g23270	FKBP-type peptidyl-prolyl cis-trans isomerase family protein	Chr01	23855430	23859313	80.6551	-2.21379	0.584268	-3.80263	0.000143171	0.00092299
itf01g23970	Disease resistance-responsive (dirigent-like protein) family protein	Chr01	24372307	24373043	20.3277	2.38719	0.474174	4.94744	7.51964e-07	1.41521e-05
itf01g24260	Calcium-dependent lipid-binding (CaLB domain) plant phosphoribosyltransferase family protein	Chr01	24496249	24498556	20.9591	-2.50681	0.475853	-5.17575	2.26998e-07	5.52797e-06
itf01g24490	hypothetical protein	Chr01	24627402	24628023	60.7059	-2.00547	0.409639	-4.88088	1.05614e-06	1.8502e-05
itf01g24620	UDP-Glycosyltransferase superfamily protein	Chr01	24726866	24728915	493.793	-2.08909	0.415715	-5.02688	4.98527e-07	1.01901e-05
itf01g24790	beta-6 tubulin	Chr01	24853278	24854823	360.58	2.59176	0.436702	5.92372	3.14731e-09	1.92405e-07
itf01g24820	cytochrome P450, family 98, subfamily A, polypeptide	Chr01	24868287	24876585	190.853	3.1496	0.49631	6.30816	2.82378e-10	3.02794e-08
itf01g25000	Serine hydrolase (FSH1) domain containing protein	Chr01	25018212	25020199	18.1723	2.05669	0.520597	3.88712	0.000101439	0.000703224
itf01g25230	minichromosome maintenance	Chr01	25169524	25172357	6.6972	2.03706	0.581253	3.38155	0.000720792	0.00340644
itf01g25370	basic helix-loop-helix (bHLH) DNA-binding superfamily protein	Chr01	25243362	25246323	36.1116	-2.05066	0.527663	-3.8832	0.000103092	0.000712086
itf01g25530	origin recognition complex protein	Chr01	25360817	25363008	25.0479	3.0303	0.502636	5.91891	3.24083e-09	1.96317e-07
itf01g25610	homeobox protein	Chr01	25424600	25425968	6.52638	2.90672	0.742002	3.55084	0.000384001	0.00205675
itf01g25860	expansin A10	Chr01	25601663	25604834	108.037	3.84435	0.59282	6.38184	1.74968e-10	2.11037e-08
itf01g25900	NAC-like, activated by AP3/PI	Chr01	25647099	25648910	716.155	-3.70962	0.516545	-7.21643	5.33694e-13	2.0275e-10
itf01g25950	VH1-interacting kinase	Chr01	25668459	25673216	8.15145	-2.32415	0.512604	-4.32913	1.49702e-05	0.000149858
itf01g25980	Protein of unknown function (DUF1336)	Chr01	25695671	25699148	554.883	-2.84551	0.423869	-6.71233	1.91541e-11	3.94857e-09
itf01g26310	Putative membrane lipoprotein	Chr01	25893756	25895622	49.8197	2.79338	0.495178	5.56587	2.60841e-08	9.8811e-07
itf01g26350	UDP-Glycosyltransferase superfamily protein	Chr01	25916593	25918075	2.06134	-3.67085	0.743982	-4.43597	9.16586e-06	0.00010107
itf01g26430	conserved hypothetical protein	Chr01	25967126	25968140	153.06	2.43293	0.480442	5.01654	5.26096e-07	1.06391e-05
itf01g26580	Pectin lyase-like superfamily protein	Chr01	26100635	26105482	51.278	3.00806	0.609879	4.86734	1.13109e-06	1.9551e-05
itf01g26840	pleiotropic drug resistance	Chr01	26276637	26284332	6261.3	-2.39157	0.416992	-5.73117	9.97382e-09	4.77039e-07
itf01g26980	Putative membrane lipoprotein	Chr01	26365749	26366106	34.3306	2.69508	0.419974	6.35352	2.10437e-10	2.36124e-08
itf01g27710	conserved hypothetical protein	Chr01	26805091	26808625	296.798	-2.27545	0.411545	-5.52262	3.33988e-08	1.19642e-06
itf01g27890	UDP-Glycosyltransferase superfamily protein	Chr01	26928934	26930401	42.4929	-3.32184	0.509534	-6.43711	1.21766e-10	1.65211e-08
itf01g28040	formin homology	Chr01	27022140	27026032	461.635	2.54723	0.3989	6.37441	1.83669e-10	2.17858e-08
itf01g28080	Uridine diphosphate glycosyltransferase 74E2	Chr01	27041619	27043412	4.56686	-4.21682	0.697817	-4.85591	1.19836e-06	2.02851e-05
itf01g28090	Uridine diphosphate glycosyltransferase 74E2	Chr01	27044449	27046688	24.7963	-2.88281	0.630036	-4.30945	1.63662e-05	0.000160711
itf01g28160	Zinc-binding dehydrogenase family protein	Chr01	27093041	27095276	89.1299	3.25636	0.638354	5.08747	3.62863e-07	7.90952e-06
itf01g28370	indole-3-acetate beta-D-glucosyltransferase	Chr01	27203976	27204564	43.4138	-3.33091	0.561037	-5.82806	5.60751e-09	3.081e-07
itf01g28380	hypothetical protein	Chr01	27204750	27205237	5.22243	-2.49904	0.605527	-3.73449	0.000188098	0.00114991
itf01g28670	rapid alkalinization factor	Chr01	27377585	27378368	1328.76	2.06755	0.398674	5.18128	2.20371e-07	5.40957e-06
itf01g28680	nodulin MtN21 /EamA-like transporter family protein	Chr01	27387871	27389603	134.265	2.11033	0.423806	4.96777	6.77256e-07	1.31366e-05
itf01g28860	Protein kinase superfamily protein	Chr01	27513973	27516973	11.1424	2.61058	0.534414	4.70813	2.50002e-06	3.62305e-05
itf01g29010	hypothetical protein	Chr01	27612982	27614669	529.965	2.07294	0.40985	5.04985	4.42158e-07	9.2658e-06
itf01g29930	alcohol dehydrogenase	Chr01	28403241	28405460	4048.06	3.03874	0.681711	4.26488	2.00005e-05	0.000189493
itf01g29950	Glycolipid transfer protein (GLTP) family protein	Chr01	28412856	28414639	192.891	-2.46301	0.563895	-4.39309	1.11751e-05	0.000118116
itf01g29970	pathogenesis-related family protein	Chr01	28418794	28420062	59.153	-2.47821	0.638424	-3.82122	0.000132795	0.000870663
itf01g30010	Plant stearoyl-acyl-carrier-protein desaturase family protein	Chr01	28442189	28443772	934.784	3.104	0.585192	5.2638	1.41106e-07	3.75243e-06
itf01g30030	alcohol dehydrogenase	Chr01	28448635	28450670	3200.57	2.98654	0.649302	4.46302	8.0813e-06	9.12552e-05
itf01g30180	nodulin MtN21 /EamA-like transporter family protein	Chr01	28567627	28570062	39.7476	2.75971	0.671826	3.98002	6.89095e-05	0.000513452
itf01g30430	cellulose synthase A2	Chr01	28832794	28840568	887.416	2.68468	0.546108	4.86293	1.15659e-06	1.98178e-05
itf01g30450	Leucine-rich repeat receptor-like protein kinase family protein	Chr01	28843244	28846213	3.677	-2.34467	0.699317	-3.08806	0.00201468	0.00780655
itf01g31050	electron carriers;protein disulfide oxidoreductases	Chr01	29199131	29204406	24.7905	2.5195	0.522103	4.75688	1.96611e-06	3.01006e-05
itf01g31160	Protein of unknown function (DUF581)	Chr01	29271641	29272790	141.165	3.04209	0.415863	7.29257	3.04104e-13	1.2636e-10
itf01g31270	trehalose-6-phosphate phosphatase	Chr01	29370785	29373236	452.565	-2.09717	0.561214	-3.73209	0.000189895	0.00115849
itf01g31490	hypothetical protein	Chr01	29498728	29500755	2003.7	-4.07476	0.593613	-6.94026	3.91382e-12	1.06204e-09
itf01g31590	O-fucosyltransferase family protein	Chr01	29567834	29571612	73.7702	2.25828	0.481583	4.67378	2.957e-06	4.15622e-05
itf01g31930	purine permease	Chr01	29735859	29737952	95.0935	-2.25195	0.424234	-5.30421	1.1316e-07	3.17434e-06
itf01g31990	Serine hydrolase (FSH1) domain containing protein	Chr01	29765006	29767156	6.87795	-2.38439	0.575718	-3.9786	6.93235e-05	0.000515814
itf01g32740	WWE protein-protein interaction domain protein family	Chr01	30306699	30310651	24.2212	-2.50328	0.523354	-4.55185	5.31763e-06	6.5512e-05
itf01g32840	KNOTTED-like from Arabidopsis thaliana	Chr01	30359538	30365374	758.386	3.07662	0.580407	5.27858	1.3019e-07	3.54002e-06
itf01g32870	S-locus lectin protein kinase family protein	Chr01	30387755	30390883	40.5796	2.31103	0.660947	3.4616	0.000536976	0.0026938
itf01g32960	hypothetical protein	Chr01	30464488	30465784	32.4917	3.46137	0.592173	5.72707	1.02181e-08	4.83849e-07
itf01g33070	conserved hypothetical protein	Chr01	30531224	30532785	68.6484	2.33566	0.608956	3.82171	0.000132527	0.000869507
itf01g33250	cytochrome P450, family 81, subfamily D, polypeptide	Chr01	30628125	30629813	38.4071	-2.12468	0.398988	-5.288	1.23663e-07	3.41847e-06
itf01g33260	Leucine-rich repeat protein kinase family protein	Chr01	30633289	30636461	12.4967	-2.65801	0.631947	-4.05487	5.01624e-05	0.000396661
itf01g33430	Serine/threonine-protein kinase WNK (With No Lysine)-related	Chr01	30705610	30707510	14.6339	2.51548	0.614874	3.97973	6.89923e-05	0.000513781
itf01g33460	Leucine-rich repeat (LRR) family protein	Chr01	30727045	30728366	94.1838	2.50045	0.438273	5.6841	1.31507e-08	5.86771e-07
itf01g33470	Leucine-rich repeat protein kinase family protein	Chr01	30731763	30734643	68.2125	2.10405	0.38337	5.47382	4.40446e-08	1.48828e-06
itf01g33540	WUSCHEL related homeobox	Chr01	30772327	30773630	208.845	3.10955	0.547129	5.68028	1.34473e-08	5.93041e-07
itf01g33630	heat shock transcription factor B4	Chr01	30840066	30841345	45.1528	2.87022	0.485932	5.85542	4.75818e-09	2.69222e-07
itf01g33640	Remorin family protein	Chr01	30845745	30849097	53.2362	3.44648	0.518042	6.53701	6.27599e-11	1.0115e-08
itf01g33700	Calcium-binding EF-hand family protein	Chr01	30873410	30873976	49.8797	-2.31269	0.568597	-4.12415	3.7211e-05	0.000313249
itf01g33840	serine carboxypeptidase-like	Chr01	30948756	30951140	25.8854	-2.21135	0.512233	-4.28538	1.82424e-05	0.000175641
itf01g33850	serine carboxypeptidase-like	Chr01	30952649	30955385	153.622	-2.53606	0.448132	-5.6246	1.85938e-08	7.59545e-07
itf01g33950	myb domain protein r1	Chr01	31017415	31018551	210.291	2.72991	0.641026	4.18193	2.8905e-05	0.000255203
itf01g34110	Transmembrane amino acid transporter family protein	Chr01	31106572	31109652	104.615	3.59705	0.552345	6.39648	1.58999e-10	1.94851e-08
itf01g34250	Homeodomain-like superfamily protein	Chr01	31184525	31188772	17.7585	-2.12882	0.571123	-3.68926	0.000224905	0.00133324
itf01g34290	cytochrome P450, family 82, subfamily C, polypeptide	Chr01	31197729	31200152	23.226	-3.85128	0.758473	-5.13212	2.86502e-07	6.58709e-06
itf01g34300	cytochrome P450, family 82, subfamily C, polypeptide	Chr01	31202649	31204836	30.6124	2.71468	0.688818	3.73347	0.000188861	0.00115404
itf01g34630	C2H2-like zinc finger protein	Chr01	31375519	31376808	3.07349	-2.46432	0.727979	-3.05089	0.00228164	0.00862851
itf01g34670	conserved hypothetical protein	Chr01	31389393	31392763	35.702	2.05329	0.494119	4.11298	3.90577e-05	0.000324741
itf01g34950	basic leucine-zipper	Chr01	31513061	31513535	306.713	2.01192	0.32867	6.11203	9.83745e-10	8.0993e-08
itf01g35240	SAUR-like auxin-responsive protein family	Chr01	31662950	31664074	39.9546	4.72505	0.64748	6.9341	4.08811e-12	1.09813e-09
itf01g35250	SAUR-like auxin-responsive protein family	Chr01	31677055	31677379	21.3868	3.13741	0.735718	3.92083	8.82449e-05	0.000631172
itf01g35310	HVA22-like protein H (ATHVA22H)	Chr01	31713768	31716159	94.1742	2.97003	0.502488	5.85706	4.71146e-09	2.67147e-07
itf01g35340	SNARE-like superfamily protein	Chr01	31722547	31724232	11.7099	2.48355	0.538547	4.49268	7.03311e-06	8.17088e-05
itf01g35440	Chaperone protein htpG family protein	Chr01	31763410	31768061	18.5939	2.24827	0.688375	3.20858	0.00133392	0.00559421
itf01g35580	DC1 domain-containing protein	Chr01	31845395	31848111	754.33	-2.669	0.626308	-4.48968	7.13286e-06	8.26277e-05
itf01g35800	NAD(P)-binding Rossmann-fold superfamily protein	Chr01	31951801	31952949	117.431	-2.14036	0.38919	-5.49283	3.95549e-08	1.36431e-06
itf01g35920	ATP citrate lyase subunit B	Chr01	32001273	32006864	263.043	2.45435	0.44582	5.46832	4.54316e-08	1.5332e-06
itf01g35950	GDSL-like Lipase/Acylhydrolase superfamily protein	Chr01	32023433	32025057	2.91405	-2.73808	0.669905	-3.53487	0.000407983	0.00215696
itf01g36020	basic chitinase	Chr01	32045799	32046105	5.11053	-4.21114	0.661462	-5.10797	3.25636e-07	7.25872e-06
itf01g36030	basic chitinase	Chr01	32047144	32047423	17.4162	-3.98066	0.710966	-4.82453	1.40337e-06	2.30512e-05
itf01g36110	Polynucleotidyl transferase, ribonuclease H-like superfamily protein	Chr01	32075404	32076058	2.73312	2.83669	0.693194	3.5995	0.000318831	0.00176823
itf01g36350	Wall-associated receptor kinase galacturonan-binding domain containing protein	Chr01	32220649	32222466	80.2184	2.51839	0.558979	4.45858	8.25048e-06	9.28109e-05
itf02g00370	ubiquitin-specific protease	Chr02	519015	522505	45.2002	2.39844	0.418808	5.6911	1.2622e-08	5.70845e-07
itf02g00490	Tetraspanin family protein	Chr02	683430	687136	135.308	2.41941	0.396065	6.08728	1.14844e-09	8.95616e-08
itf02g00510	RING/U-box superfamily protein	Chr02	713906	715104	3.26346	2.23724	0.738318	3.09585	0.0019625	0.00764222
itf02g01980	calcium sensing receptor	Chr02	2814423	2819819	342.791	2.66537	0.440134	6.03543	1.58539e-09	1.13371e-07
itf02g02160	transducin family protein / WD-40 repeat family protein	Chr02	3018551	3023748	24.6997	2.55798	0.539	4.65788	3.19477e-06	4.41802e-05
itf02g02670	PsbP-like protein	Chr02	3672044	3675891	27.5771	2.05821	0.485603	4.20143	2.65235e-05	0.000238895	NOCR	2
itf02g02730	DUF4378 domain containing protein	Chr02	3754386	3761716	54.1391	2.09173	0.432548	4.81046	1.50584e-06	2.4299e-05	NOCR	2
itf02g02840	RPA70-kDa subunit B	Chr02	3902327	3906145	51.8453	2.42994	0.461412	5.21897	1.79924e-07	4.62488e-06	NOCR	2
itf02g03080	Leucine-rich repeat protein kinase family protein	Chr02	4068304	4071451	24.3042	-3.37557	0.673946	-4.85811	1.1851e-06	2.01505e-05	NOCR	2
itf02g03320	glucan endo-1,3-beta-glucosidase-like protein	Chr02	4268241	4273761	76.6786	3.844	0.58958	6.36892	1.90358e-10	2.20588e-08	NOCR	2
itf02g03670	Pyridine nucleotide-disulphide oxidoreductase family protein	Chr02	4635062	4636868	25.4624	2.20363	0.654935	3.34996	0.000808233	0.00374122	NOCR	2
itf02g03680	Pyridine nucleotide-disulphide oxidoreductase family protein	Chr02	4648724	4650314	23.2443	2.06974	0.631627	3.24994	0.00115428	0.00497905	NOCR	2
itf02g03850	NAC domain containing protein	Chr02	4834674	4836796	165.308	-2.96923	0.450494	-6.59085	4.37311e-11	7.47428e-09	NOCR	2
itf02g04770	homolog of Medicago truncatula MTN3	Chr02	5937856	5939964	1916.16	-2.10079	0.457482	-4.5985	4.25541e-06	5.50409e-05	NOCR	2
itf02g05150	Kunitz family trypsin and protease inhibitor protein	Chr02	6151340	6151964	1.59355	-2.95778	0.805326	-3.0598	0.00221486	0.00842869	NOCR	2
itf02g05680	GATA transcription factor	Chr02	6372183	6373730	43.7963	2.58213	0.476263	5.37731	7.56067e-08	2.28219e-06	NOCR	2
itf02g05900	myo-inositol oxygenase	Chr02	6484682	6487378	81.2157	2.40455	0.655687	3.60366	0.00031377	0.00174708	NOCR	2
itf02g06480	Protein kinase protein with adenine nucleotide alpha hydrolases-like domain	Chr02	6775032	6778662	253.964	-3.46915	0.5605	-6.26217	3.79653e-10	3.79553e-08	NOCR	2
itf02g06530	Bifunctional inhibitor/lipid-transfer protein/seed storage 2S albumin superfamily protein	Chr02	6796429	6797014	187.048	4.06143	0.673989	5.8939	3.77176e-09	2.23759e-07	NOCR	2
itf02g06740	RAB GTPase homolog C2A	Chr02	6938257	6940633	233.568	-2.35873	0.376713	-6.26904	3.63278e-10	3.68205e-08	NOCR	2
itf02g06810	2-oxoglutarate (2OG) and Fe(II)-dependent oxygenase superfamily protein	Chr02	6978207	6980417	11.713	2.95764	0.631996	4.43601	9.16405e-06	0.00010107	NOCR	2
itf02g06980	Protein of unknown function (DUF581)	Chr02	7090260	7091762	426.771	2.22959	0.282955	7.87493	3.40935e-15	4.53324e-12	NOCR	2
itf02g07420	Protein of unknown function (DUF1666)	Chr02	7389444	7392844	39.5286	2.85435	0.517001	5.43128	5.59509e-08	1.79265e-06	NOCR	2
itf02g07470	Ubiquitin-specific protease family C19-related protein	Chr02	7416175	7420769	40.3074	2.60077	0.534717	4.81065	1.5044e-06	2.42906e-05	NOCR	2
itf02g08710	rhomboid protein-related	Chr02	8117257	8120602	14.179	3.20297	0.676496	4.5657	4.97821e-06	6.21528e-05	NOCR	2
itf02g08870	plasma membrane intrinsic protein 2;5	Chr02	8202357	8204201	1296.36	2.99254	0.50058	5.9815	2.21096e-09	1.47656e-07	NOCR	2
itf02g09210	ammonium transporter 1;2	Chr02	8372834	8374894	39.3317	-2.30484	0.700695	-3.30694	0.000943222	0.00423987	NOCR	2
itf02g09410	DUF4228 domain containing protein	Chr02	8479480	8480360	7.87086	-3.80627	0.691615	-4.93267	8.11142e-07	1.50633e-05	NOCR	2
itf02g09550	WRKY family transcription factor family protein	Chr02	8557946	8560326	16.9839	2.07552	0.429851	4.77475	1.79927e-06	2.80864e-05	NOCR	2
itf02g09710	HXXXD-type acyl-transferase family protein	Chr02	8660282	8663836	98.3311	2.10675	0.56049	3.78003	0.000156812	0.000994679	NOCR	2
itf02g09800	Bifunctional inhibitor/lipid-transfer protein/seed storage 2S albumin superfamily protein	Chr02	8716765	8717983	1060.92	2.68654	0.576314	4.55918	5.13544e-06	6.37865e-05	NOCR	2
itf02g10400	nudix hydrolase homolog	Chr02	9090641	9093361	120.022	-2.80126	0.438328	-6.35925	2.02735e-10	2.29419e-08	NOCR	2
itf02g10730	FASCICLIN-like arabinoogalactan	Chr02	9278342	9280466	362.581	2.24677	0.477532	4.69398	2.67943e-06	3.83913e-05	NOCR	2
itf02g10810	O-Glycosyl hydrolases family 17 protein	Chr02	9328251	9330411	256.25	2.3782	0.437609	5.41193	6.23484e-08	1.95985e-06	NOCR	2
itf02g11060	cellulose synthase-like B4	Chr02	9484349	9488584	163.73	-3.06148	0.428414	-7.10543	1.19945e-12	3.7526e-10	NOCR	2
itf02g11070	cellulose synthase-like B	Chr02	9493620	9497303	356.887	-2.59446	0.536419	-4.82187	1.42216e-06	2.32735e-05	NOCR	2
itf02g11080	cellulose synthase-like B4	Chr02	9501732	9505067	11.514	-2.11015	0.587665	-3.54121	0.000398298	0.00211754	NOCR	2
itf02g11120	SLAC1 homologue	Chr02	9540282	9543044	17.478	-3.48876	0.719935	-4.61784	3.87755e-06	5.12759e-05	NOCR	2
itf02g11290	glucose-6-phosphate/phosphate translocator	Chr02	9655996	9658368	291.745	6.07539	0.657405	8.56855	1.04793e-17	2.32231e-14	NOCR_NONC	2_1
itf02g11510	uclacyanin	Chr02	9755011	9755901	105.548	2.3391	0.416734	5.58296	2.36459e-08	9.10009e-07	NOCR_NONC	2_1
itf02g11520	basic helix-loop-helix (bHLH) DNA-binding superfamily protein	Chr02	9756371	9757907	679.346	-2.54425	0.721337	-3.46958	0.000521268	0.00263237	NOCR_NONC	2_1
itf02g11620	xyloglucan endotransglucosylase/hydrolase	Chr02	9805160	9807066	463.123	2.29151	0.499772	4.612	3.98816e-06	5.23222e-05	NOCR_NONC	2_1
itf02g11830	MYB-like	Chr02	9916498	9917848	25.1882	-2.68613	0.628461	-4.21643	2.48195e-05	0.000226658	NOCR_NONC	2_1
itf02g12050	hypothetical protein	Chr02	10046331	10047731	41.4516	2.51333	0.406733	6.13681	8.4194e-10	7.19926e-08	NOCR_NONC	2_1
itf02g12060	conserved hypothetical protein	Chr02	10048787	10051920	212.66	2.36863	0.391564	6.03231	1.61635e-09	1.14929e-07	NOCR_NONC	2_1
itf02g12230	expansin B3	Chr02	10158376	10160841	96.8785	4.9959	0.65301	7.38289	1.54892e-13	7.95095e-11	NOCR_NONC	2_1
itf02g12240	Tetraspanin family protein	Chr02	10163864	10166922	75.5138	5.34797	0.783627	5.93263	2.98112e-09	1.84795e-07	NOCR_NONC	2_1
itf02g12470	Protein of unknown function (DUF506)	Chr02	10310020	10311440	5.49916	2.19059	0.580002	3.60437	0.000312911	0.0017434	NOCR_NONC	2_1
itf02g12860	O-methyltransferase family protein	Chr02	10553309	10554056	7.27831	-3.81823	0.573248	-5.44778	5.10014e-08	1.68065e-06	NOCR_NONC	2_1
itf02g12890	O-methyltransferase family protein	Chr02	10565300	10567287	975.072	-3.76854	0.535298	-7.11741	1.09978e-12	3.55734e-10	NOCR_NONC	2_1
itf02g12910	O-methyltransferase family protein	Chr02	10578873	10581499	25.6769	-2.91121	0.627708	-4.47126	7.77588e-06	8.8256e-05	NOCR_NONC	2_1
itf02g13030	plasmodesmata callose-binding protein	Chr02	10629280	10630692	81.6565	2.3813	0.511171	4.64897	3.33595e-06	4.56343e-05	NOCR_NONC	2_1
itf02g13050	HXXXD-type acyl-transferase family protein	Chr02	10640042	10642433	24.0622	2.94631	0.6161	4.66504	3.08559e-06	4.28934e-05	NOCR_NONC	2_1
itf02g13130	basic helix-loop-helix (bHLH) DNA-binding superfamily protein	Chr02	10670928	10672583	319.352	-2.0772	0.391595	-5.30215	1.14445e-07	3.20025e-06	NOCR_NONC	2_1
itf02g13190	Protein of unknown function (DUF640)	Chr02	10724307	10727013	34.7071	3.43741	0.711829	4.71459	2.42196e-06	3.54356e-05	NOCR_NONC	2_1
itf02g13790	phy rapidly regulated	Chr02	11103648	11104518	44.4954	4.41383	0.674027	6.22924	4.68692e-10	4.44291e-08	NOCR	2
itf02g13840	WRKY DNA-binding protein	Chr02	11150429	11152360	111.408	2.05896	0.336545	6.10873	1.00424e-09	8.16689e-08	NOCR	2
itf02g13930	ADP glucose pyrophosphorylase	Chr02	11234611	11238382	908.324	3.46819	0.500814	6.89894	5.23926e-12	1.3527e-09	NOCR	2
itf02g14300	cytochrome P450, family 72, subfamily A, polypeptide	Chr02	11474509	11477436	339.424	-2.39324	0.468713	-5.12054	3.04654e-07	6.90091e-06
itf02g14490	gamma-glutamyl hydrolase	Chr02	11626296	11628931	36.4789	2.54278	0.64001	3.93689	8.25445e-05	0.000595849
itf02g14640	Protein of unknown function (DUF640)	Chr02	11748493	11749093	4.6818	2.70393	0.809382	3.21335	0.00131195	0.00551688
itf02g14700	tetratricopetide-repeat thioredoxin-like	Chr02	11787063	11791496	127.954	2.22888	0.438504	5.06145	4.16074e-07	8.83052e-06
itf02g14930	Basic-leucine zipper (bZIP) transcription factor family protein	Chr02	11945727	11948846	37.1358	3.2116	0.660821	4.61159	3.99602e-06	5.23995e-05
itf02g15020	hypothetical protein	Chr02	12009429	12010442	8.12793	2.47539	0.666743	3.48776	0.000487088	0.00248621
itf02g15160	squamosa promoter binding protein-like	Chr02	12095338	12096497	126.534	2.6948	0.403955	6.65269	2.87775e-11	5.54551e-09
itf02g15230	early nodulin-like protein	Chr02	12155769	12157925	3793.62	-2.26698	0.338963	-6.69093	2.21751e-11	4.48839e-09
itf02g15450	NAC (No Apical Meristem) domain transcriptional regulator superfamily protein	Chr02	12362469	12364218	809.768	-3.30247	0.454508	-7.30718	2.72808e-13	1.15887e-10
itf02g15500	HAL2-like	Chr02	12403061	12405998	64.2113	2.0108	0.409069	4.89939	9.61371e-07	1.72565e-05
itf02g15690	hypothetical protein	Chr02	12495865	12497425	8.26047	-2.20029	0.682635	-3.1035	0.00191249	0.00749355
itf02g16130	thiazole biosynthetic enzyme, chloroplast (ARA6) (THI1) (THI4)	Chr02	12823586	12825593	828.61	4.34056	0.616011	7.09642	1.28034e-12	3.95908e-10
itf02g16710	tornado	Chr02	13204643	13206035	33.6056	2.03781	0.437432	4.62562	3.73479e-06	4.97114e-05
itf02g16830	multidrug resistance-associated protein	Chr02	13289501	13294989	49.699	-2.07589	0.494578	-4.1836	2.86927e-05	0.000253834
itf02g17270	uridine kinase-like	Chr02	13609515	13616186	77.9632	2.90154	0.480392	5.99287	2.06166e-09	1.41304e-07
itf02g17970	nitrate transmembrane transporters	Chr02	14108412	14110327	151.491	-3.52849	0.698764	-5.05505	4.30273e-07	9.08114e-06
itf02g17980	nitrate transmembrane transporters	Chr02	14114294	14115900	10.7094	-3.35093	0.730942	-4.2112	2.54015e-05	0.000230941
itf02g17990	nitrate transmembrane transporters	Chr02	14119864	14121071	45.3882	-3.73561	0.71218	-5.20678	1.92144e-07	4.87101e-06
itf02g18120	Pectin lyase-like superfamily protein	Chr02	14223146	14225728	614.319	4.07744	0.528694	7.63076	2.3338e-14	1.82537e-11
itf02g18500	Leucine-rich repeat transmembrane protein kinase	Chr02	14575392	14578320	49.1542	-2.05586	0.428857	-4.78655	1.69675e-06	2.67943e-05
itf02g19040	UDP-Glycosyltransferase superfamily protein	Chr02	15160268	15163507	20.5479	-3.99584	0.780583	-4.76288	1.90851e-06	2.94221e-05
itf02g19100	aldehyde dehydrogenase 2B4	Chr02	15210657	15215359	197.685	-3.21907	0.526316	-6.13065	8.75202e-10	7.40497e-08
itf02g19350	Gibberellin-regulated family protein	Chr02	15414673	15419075	20.0019	3.32829	0.642125	4.96496	6.87161e-07	1.3288e-05
itf02g19430	Transducin/WD40 repeat-like superfamily protein	Chr02	15449516	15450696	5.5858	-2.1925	0.606362	-3.41683	0.000633546	0.00307228
itf02g19600	hypothetical protein	Chr02	15630681	15631272	2.0371	-2.67925	0.787871	-3.15969	0.00157935	0.00640142
itf02g19780	Major facilitator superfamily protein	Chr02	15790143	15796101	127.758	-2.55578	0.454374	-5.60096	2.13167e-08	8.46081e-07
itf02g19860	2-oxoglutarate (2OG) and Fe(II)-dependent oxygenase superfamily protein	Chr02	15901607	15901976	21.5336	-2.19775	0.54949	-3.9618	7.43868e-05	0.000545551
itf02g20190	WRKY DNA-binding protein	Chr02	16315442	16321048	12.5859	-3.02358	0.760552	-3.87757	0.000105506	0.000725907
itf02g21090	EamA-like transporter family domain containing protein	Chr02	17591806	17595374	244.677	-2.766	0.396818	-6.97396	3.08137e-12	8.62557e-10
itf02g21760	Galactose mutarotase-like superfamily protein	Chr02	18596182	18598093	128.437	3.06468	0.52103	5.89363	3.77798e-09	2.23759e-07
itf02g24200	hypothetical protein	Chr02	21892397	21893188	2.22997	-2.90712	0.803834	-3.20062	0.0013713	0.005723
itf02g24230	hypothetical protein	Chr02	21937666	21938161	10.1276	-3.4355	0.636073	-5.00238	5.6628e-07	1.12887e-05
itf02g25360	adenine phosphoribosyltransferase	Chr02	23495851	23498420	76.9066	2.18663	0.64064	3.30472	0.000950725	0.00426783
itf02g26180	Thionin-like protein	Chr02	24136207	24136638	104.438	2.46146	0.527318	4.6172	3.88956e-06	5.13835e-05
itf02g26440	2-oxoglutarate (2OG) and Fe(II)-dependent oxygenase superfamily protein	Chr02	24391159	24393072	723.03	-3.05615	0.76982	-4.71536	2.41289e-06	3.53922e-05
itf02g27030	Embryo-specific protein 3, (ATS3)	Chr02	24923046	24924585	174.489	3.05035	0.532256	5.72139	1.05658e-08	4.96426e-07
itf02g27350	Sterile alpha motif (SAM) domain-containing protein	Chr02	25305524	25306336	79.0562	2.6287	0.519099	5.02614	5.00452e-07	1.02216e-05
itf02g28590	Bifunctional inhibitor/lipid-transfer protein/seed storage 2S albumin superfamily protein	Chr02	27072126	27072729	27.815	2.10726	0.525319	3.96812	7.24412e-05	0.000534395
itf03g00120	Ferritin/ribonucleotide reductase-like family protein	Chr03	56086	56660	22.4895	3.35886	0.602606	5.38951	7.06504e-08	2.17454e-06	NONC_NOCR	2_3
itf03g00170	conserved hypothetical protein	Chr03	73290	75906	5.43114	2.16998	0.572888	3.63316	0.00027997	0.00159393	NONC_NOCR	2_3
itf03g00260	hypothetical protein	Chr03	116394	119564	11.7459	-3.50857	0.572018	-5.02194	5.11533e-07	1.03847e-05	NONC_NOCR	2_3
itf03g00270	conserved hypothetical protein	Chr03	119305	120766	564.67	-2.40521	0.321894	-7.47789	7.5527e-14	4.56475e-11	NONC_NOCR	2_3
itf03g00280	hypothetical protein	Chr03	123804	124092	41.5599	-2.04792	0.424435	-4.81793	1.45058e-06	2.35934e-05	NONC_NOCR	2_3
itf03g00310	lysine histidine transporter	Chr03	131478	134122	37.3513	-2.46847	0.597285	-4.10404	4.05997e-05	0.000335377	NONC_NOCR	2_3
itf03g00660	Raffinose synthase family protein	Chr03	284333	287252	655.338	-2.56708	0.556418	-4.67031	3.0075e-06	4.20275e-05	NONC_NOCR	2_3
itf03g00710	Protein of unknown function (DUF1645)	Chr03	325568	326585	76.7931	-2.14962	0.549597	-3.91196	9.15507e-05	0.000648192	NONC_NOCR	2_3
itf03g00740	L-aspartate oxidase	Chr03	338350	342372	357.031	2.10919	0.456085	4.60946	4.03719e-06	5.27572e-05	NONC_NOCR	2_3
itf03g00790	conserved hypothetical protein	Chr03	362974	364334	46.4736	2.04315	0.521489	3.92376	8.71763e-05	0.000624873	NONC_NOCR	2_3
itf03g00970	Gibberellin-regulated family protein	Chr03	449467	450624	589.975	3.09923	0.529146	5.74374	9.26059e-09	4.5353e-07	NONC_NOCR	2_3
itf03g00980	Peroxidase superfamily protein	Chr03	455540	456830	1079.48	2.28401	0.466749	4.88246	1.04769e-06	1.84145e-05	NONC_NOCR	2_3
itf03g01130	B12D protein	Chr03	498156	499348	34.7362	2.16157	0.504647	4.23184	2.31787e-05	0.000214099	NONC_NOCR	2_3
itf03g01180	Duplicated homeodomain-like superfamily protein	Chr03	526214	527403	135.904	2.36814	0.502725	4.68553	2.79235e-06	3.97096e-05	NONC_NOCR	2_3
itf03g01190	Oxoglutarate/iron-dependent oxygenase	Chr03	528020	530069	484.315	2.21342	0.290814	7.60696	2.80616e-14	2.01687e-11	NONC_NOCR	2_3
itf03g01450	hypothetical protein	Chr03	676500	677665	141.867	-3.0226	0.559937	-5.47915	4.27365e-08	1.45146e-06	NONC_NOCR	2_3
itf03g01720	chorismate mutase	Chr03	819154	822148	9.93925	-2.75049	0.619969	-4.17404	2.99246e-05	0.00026291	NONC_NOCR	2_3
itf03g01860	alpha/beta-Hydrolases superfamily protein	Chr03	898336	901993	44.6238	3.66588	0.68977	5.15068	2.59541e-07	6.11334e-06	NONC_NOCR	2_3
itf03g02240	K-box region and MADS-box transcription factor family protein	Chr03	1102599	1106803	77.1655	-2.34672	0.466085	-5.03458	4.78895e-07	9.87229e-06	NONC_NOCR	2_3
itf03g02460	Methylenetetrahydrofolate reductase family protein	Chr03	1255826	1259385	485.541	-2.2466	0.425996	-5.28168	1.28002e-07	3.50563e-06	NONC_NOCR	2_3
itf03g02730	DUF4228 domain containing protein	Chr03	1408018	1408853	137.953	3.00473	0.579148	5.12152	3.03078e-07	6.87107e-06	NONC_NOCR	2_3
itf03g02790	hypothetical protein	Chr03	1437248	1438300	18.3766	3.39716	0.550704	5.98563	2.15555e-09	1.45489e-07	NONC_NOCR_TNR	2_3_2
itf03g03190	Lipase/lipooxygenase, PLAT/LH2 family protein	Chr03	1660149	1661026	625.225	2.59926	0.445773	5.81715	5.98593e-09	3.22888e-07	NOCR_TNR	3_2
itf03g03340	RAB GTPase homolog H1D	Chr03	1771043	1780067	9.30463	2.4238	0.534842	4.39272	1.11942e-05	0.00011827	NOCR_TNR	3_2
itf03g03360	conserved hypothetical protein	Chr03	1782567	1786210	231.786	3.84523	0.488974	7.79583	6.39851e-15	7.16417e-12	NOCR_TNR	3_2
itf03g03510	hypothetical protein	Chr03	1887821	1888133	102.056	-2.59023	0.675055	-3.91464	9.05408e-05	0.000642238	NOCR_TNR	3_2
itf03g03680	Cellulase (glycosyl hydrolase family 5) domain containing protein	Chr03	2029656	2032859	61.755	2.16519	0.341758	6.31518	2.69853e-10	2.91592e-08	NOCR	3
itf03g03720	MATE efflux family protein	Chr03	2059170	2060135	11.4838	-2.02622	0.621203	-3.23141	0.00123182	0.00524882	NOCR	3
itf03g04200	elicitor-activated gene 3-2	Chr03	2381003	2381958	30.8204	2.34593	0.517671	4.49591	6.92745e-06	8.08448e-05	NOCR	3
itf03g04210	elicitor-activated gene 3-1	Chr03	2385233	2387680	258.555	2.52039	0.458187	5.48826	4.05904e-08	1.3946e-06	NOCR	3
itf03g04220	elicitor-activated gene 3-1	Chr03	2395068	2397145	84.9753	2.18839	0.47239	4.61537	3.92402e-06	5.16591e-05	NOCR	3
itf03g04300	elicitor-activated gene 3-2	Chr03	2440477	2442719	1889.8	-2.0509	0.481683	-4.24982	2.13942e-05	0.000200329	NOCR	3
itf03g04450	O-Glycosyl hydrolases family 17 protein	Chr03	2522531	2525736	68.7735	2.06532	0.402585	5.10984	3.2243e-07	7.21142e-06	NOCR	3
itf03g04480	hypothetical protein	Chr03	2560449	2560805	4.3023	2.01928	0.515307	3.70744	0.000209365	0.00125624	NOCR	3
itf03g04630	STELAR K+ outward rectifier	Chr03	2689028	2697849	94.431	-2.59283	0.41187	-6.28014	3.38263e-10	3.47314e-08	NOCR	3
itf03g04730	ethylene response factor	Chr03	2775218	2776065	17.9764	2.30665	0.623047	3.60348	0.000313988	0.00174793	NOCR	3
itf03g05420	Auxin efflux carrier family protein	Chr03	3384505	3387294	27.2605	2.35989	0.54131	4.29722	1.72954e-05	0.000168106
itf03g05640	polyadenylate-binding protein	Chr03	3623846	3625648	7.6154	2.43638	0.623413	3.64052	0.000272088	0.00155907
itf03g06120	Calcium-dependent phosphotriesterase superfamily protein	Chr03	3973340	3976247	176.519	-2.29926	0.505821	-4.55656	5.19979e-06	6.43744e-05
itf03g06140	Calcium-dependent phosphotriesterase superfamily protein	Chr03	3978976	3979697	10.1674	-2.42613	0.552451	-4.06151	4.87561e-05	0.000387615
itf03g06170	MATE efflux family protein	Chr03	3992536	3998733	127.356	2.04142	0.513054	3.97839	6.93839e-05	0.000516119
itf03g06740	Protein of unknown function (DUF630) ;Protein of unknown function (DUF632)	Chr03	4306217	4309445	52.4873	2.08597	0.418579	4.95906	7.08341e-07	1.35903e-05
itf03g06800	Major facilitator superfamily protein	Chr03	4350073	4352122	150.014	3.4109	0.701077	4.73487	2.19197e-06	3.29515e-05
itf03g07180	Leucine-rich repeat (LRR) family protein	Chr03	4668510	4669782	7.95834	2.63408	0.652548	3.55129	0.000383348	0.00205366
itf03g07210	beta-galactosidase	Chr03	4690322	4696933	269.649	2.12773	0.456515	4.63381	3.58993e-06	4.80934e-05
itf03g07290	conserved hypothetical protein	Chr03	4756082	4761521	7.68382	2.85065	0.47302	5.70477	1.16498e-08	5.38072e-07
itf03g07380	conserved hypothetical protein	Chr03	4808855	4810005	33.9403	2.17122	0.518508	4.18304	2.87643e-05	0.000254213
itf03g07400	galactinol synthase	Chr03	4830696	4831917	98.4128	-2.28484	0.640475	-3.60794	0.000308633	0.0017239
itf03g07410	galactinol synthase	Chr03	4834869	4836430	844.304	-2.74112	0.527526	-5.23319	1.66611e-07	4.33532e-06
itf03g07750	Major facilitator superfamily protein	Chr03	5103805	5105618	29.3204	3.25812	0.727525	4.42975	9.43402e-06	0.000103268
itf03g07890	conserved hypothetical protein	Chr03	5245029	5248065	43.4929	3.22321	0.571735	5.59728	2.17737e-08	8.59091e-07
itf03g08040	alpha/beta-Hydrolases superfamily protein	Chr03	5355457	5359072	9.25305	2.54645	0.54493	4.49673	6.90052e-06	8.06618e-05
itf03g08680	beta HLH protein	Chr03	5807233	5809170	916.92	3.77622	0.511453	7.33464	2.22312e-13	1.0193e-10
itf03g08800	basic helix-loop-helix (bHLH) DNA-binding superfamily protein	Chr03	5925799	5928446	3.63126	-2.91599	0.774822	-3.57958	0.000344148	0.00188157
itf03g08850	conserved hypothetical protein	Chr03	5989027	5990023	11.7914	2.30292	0.587475	3.8327	0.000126744	0.000839688
itf03g09690	nodulin MtN21 /EamA-like transporter family protein	Chr03	7130884	7135636	162.716	2.25367	0.395757	5.68173	1.33337e-08	5.9181e-07
itf03g09950	expansin B2	Chr03	7295509	7298567	27.3254	2.54867	0.72794	3.37988	0.000725176	0.00342472
itf03g09990	conserved hypothetical protein	Chr03	7344280	7345753	12.5463	-3.62978	0.809505	-4.70155	2.58192e-06	3.72954e-05
itf03g10550	Protein of unknown function (DUF793)	Chr03	8225092	8226455	3.3111	-2.41914	0.742015	-3.46927	0.000521881	0.00263347
itf03g10900	sigma factor A	Chr03	8714081	8718373	242.286	-2.18135	0.364818	-5.97383	2.31751e-09	1.52548e-07
itf03g11330	inflorescence deficient in abscission (IDA)-like	Chr03	9204698	9205424	13.3605	2.39565	0.529396	4.43352	9.27075e-06	0.000101812
itf03g11680	Plant invertase/pectin methylesterase inhibitor superfamily	Chr03	9838973	9846580	367.589	2.00214	0.329668	6.06902	1.28695e-09	9.64492e-08
itf03g12250	high-affinity K+ transporter	Chr03	10536028	10537204	18.0773	-2.45401	0.52001	-4.65239	3.28114e-06	4.51632e-05
itf03g12410	Protein of unknown function (DUF630 and DUF632)	Chr03	10704628	10705744	19.4145	2.32661	0.465358	4.93041	8.20575e-07	1.51644e-05
itf03g12450	heavy metal atpase	Chr03	10781663	10793200	319.039	-2.68705	0.438949	-6.12614	9.00346e-10	7.57687e-08
itf03g12460	heavy metal atpase	Chr03	10791245	10791558	15.9935	-2.66644	0.527193	-4.90855	9.17516e-07	1.66549e-05
itf03g12810	BCL-2-associated athanogene	Chr03	11132490	11134711	518.985	2.22168	0.417486	5.30823	1.10694e-07	3.11978e-06
itf03g12860	TraB family protein	Chr03	11156726	11158924	13.7841	2.22365	0.678175	3.21816	0.00129016	0.00543988
itf03g12940	peptidoglycan-binding LysM domain-containing protein	Chr03	11182770	11183100	292.081	-2.81713	0.601688	-4.75414	1.99296e-06	3.04416e-05
itf03g13000	basic helix-loop-helix (bHLH) DNA-binding superfamily protein	Chr03	11244104	11245226	13.9993	-3.03209	0.682754	-4.32909	1.49728e-05	0.000149858
itf03g13010	basic helix-loop-helix (bHLH) DNA-binding superfamily protein	Chr03	11248632	11251961	20.2814	-2.28598	0.500631	-4.4939	6.99295e-06	8.13845e-05
itf03g13070	ERECTA-like	Chr03	11279979	11286463	40.7114	3.00092	0.686746	4.27399	1.92009e-05	0.000183699
itf03g13150	Protein of unknown function (DUF1442)	Chr03	11315288	11316360	70.4441	2.15108	0.415732	5.14695	2.64753e-07	6.2141e-06
itf03g13190	EXORDIUM like	Chr03	11338277	11339633	522.224	2.75337	0.493406	5.53322	3.14409e-08	1.13911e-06
itf03g13250	Plant invertase/pectin methylesterase inhibitor superfamily protein	Chr03	11376157	11377164	569.056	3.16228	0.666148	4.79285	1.64431e-06	2.61527e-05
itf03g13530	ethylene responsive element binding factor	Chr03	11527884	11529041	1466.75	-2.61336	0.502298	-5.21077	1.88054e-07	4.78557e-06
itf03g13780	glutamate dehydrogenase	Chr03	11671770	11674968	60.451	-2.32029	0.455951	-5.07174	3.94195e-07	8.47823e-06
itf03g13990	Protein NETWORKED 4B	Chr03	11767810	11770682	117.928	2.13108	0.395066	5.37185	7.79314e-08	2.33382e-06
itf03g14020	conserved hypothetical protein	Chr03	11789593	11789998	35.5593	-2.05611	0.453269	-4.51331	6.38243e-06	7.57714e-05
itf03g14120	expansin A10	Chr03	11847444	11849325	382.249	2.50813	0.560898	4.39438	1.11087e-05	0.000117695
itf03g14180	potassium transporter	Chr03	11876337	11880393	85.5669	2.15446	0.467883	4.58729	4.49028e-06	5.74086e-05
itf03g14290	conserved hypothetical protein	Chr03	11945758	11946753	16.9357	3.59355	0.73881	4.62561	3.73495e-06	4.97114e-05
itf03g14300	Protein of unknown function (DUF567)	Chr03	11955910	11956745	31.1805	-3.3307	0.699099	-4.6228	3.78587e-06	5.02634e-05
itf03g14790	phospholipase C	Chr03	12266781	12274303	187.024	-2.619	0.49552	-5.29895	1.16468e-07	3.24656e-06
itf03g14960	Nucleotide-diphospho-sugar transferases superfamily protein	Chr03	12366905	12369366	45.3939	2.97872	0.572659	5.17972	2.22225e-07	5.44666e-06
itf03g15070	Laccase/Diphenol oxidase family protein	Chr03	12438119	12441271	36.6593	2.00522	0.646805	3.13421	0.00172316	0.00688048
itf03g15150	RING/FYVE/PHD zinc finger superfamily protein	Chr03	12489786	12492194	7.14891	3.28478	0.589695	5.15861	2.48792e-07	5.92843e-06
itf03g15290	conserved hypothetical protein	Chr03	12553838	12555234	41.2773	-2.08035	0.57906	-3.57723	0.000347252	0.00189464
itf03g15350	Exostosin family protein	Chr03	12587993	12589329	85.1243	-3.14552	0.503834	-6.22468	4.8255e-10	4.55052e-08
itf03g15380	conserved hypothetical protein	Chr03	12604710	12606382	11.933	2.76057	0.581973	4.59312	4.36676e-06	5.60992e-05
itf03g15440	NAD(P)-binding Rossmann-fold superfamily protein	Chr03	12631015	12637852	340.387	-2.40085	0.560264	-4.27351	1.92418e-05	0.000183929
itf03g15460	zinc-finger protein	Chr03	12646539	12647160	5.3337	-2.09198	0.60283	-3.30736	0.000941802	0.00423421
itf03g15620	expansin A6	Chr03	12753222	12754801	171.973	3.05952	0.412679	7.39377	1.42723e-13	7.59087e-11
itf03g15770	Heavy metal transport/detoxification superfamily protein	Chr03	12843975	12844813	48.5069	-2.01909	0.583128	-3.43312	0.000596684	0.00293139
itf03g15990	cytochrome P450, family 89, subfamily A, polypeptide	Chr03	12962082	12965720	380.148	-2.28321	0.436825	-5.23678	1.63398e-07	4.26422e-06
itf03g16100	alpha/beta-Hydrolases superfamily protein	Chr03	13021646	13024012	421.081	-2.07549	0.572682	-3.5673	0.000360679	0.00195546
itf03g16470	Protein of unknown function (DUF640)	Chr03	13259507	13260558	50.3111	2.64693	0.534388	4.89675	9.74347e-07	1.74132e-05
itf03g16760	F-box family protein	Chr03	13437727	13438159	48.0571	-2.7928	0.507191	-5.47834	4.29335e-08	1.45629e-06
itf03g16770	F-box family protein	Chr03	13438206	13438893	61.5218	-2.67485	0.50835	-5.24748	1.54194e-07	4.05346e-06
itf03g17120	Peroxidase superfamily protein	Chr03	13595219	13596910	8.30692	-3.24026	0.778648	-3.84023	0.000122918	0.000819857
itf03g17460	cytochrome P450, family 72, subfamily A, polypeptide	Chr03	13839792	13841166	31.7316	-2.91385	0.648785	-4.49523	6.94962e-06	8.0951e-05
itf03g17470	cytochrome P450, family 72, subfamily A, polypeptide	Chr03	13841392	13842835	76.6952	-2.82189	0.586433	-4.81308	1.48623e-06	2.40556e-05
itf03g18240	Mnd1 family protein	Chr03	14376764	14379934	19.0021	2.86467	0.506208	5.54077	3.0114e-08	1.09702e-06
itf03g18340	Leucine-rich repeat (LRR) family protein	Chr03	14492820	14494481	32.3188	4.29146	0.710474	5.69936	1.20258e-08	5.50435e-07
itf03g18790	ABL interactor-like protein	Chr03	14809490	14811910	158.026	3.98758	0.616752	6.32673	2.50404e-10	2.7291e-08
itf03g19410	Stabilizer of iron transporter SufD / Polynucleotidyl transferase	Chr03	15208987	15214858	149.414	3.10444	0.397229	7.79452	6.46562e-15	7.16417e-12
itf03g20110	Lactoylglutathione lyase / glyoxalase I family protein	Chr03	15802051	15803436	86.3475	-2.09136	0.504157	-4.12336	3.73384e-05	0.000314023
itf03g21040	spermidine hydroxycinnamoyl transferase	Chr03	16672511	16677715	31.6322	3.43332	0.738378	4.64832	3.34641e-06	4.57538e-05
itf03g21060	Bifunctional inhibitor/lipid-transfer protein/seed storage 2S albumin superfamily protein	Chr03	16681725	16683984	350.04	4.84302	0.702105	6.60972	3.85035e-11	6.8789e-09
itf03g21190	monogalactosyldiacylglycerol synthase	Chr03	16834652	16837538	39.5197	2.00307	0.608341	3.33904	0.000840691	0.00385989
itf03g21280	glucuronidase	Chr03	16869653	16872407	102.027	2.788	0.563561	4.89198	9.98284e-07	1.77277e-05
itf03g21770	NB-ARC domain-containing disease resistance protein	Chr03	17328267	17331087	2.66738	-2.84518	0.720916	-3.65514	0.000257046	0.00148795
itf03g21820	Endomembrane protein 70 protein family	Chr03	17352300	17355150	474.639	2.63841	0.445511	5.89929	3.65079e-09	2.1768e-07
itf03g21910	H(+)-ATPase	Chr03	17434260	17440153	10.6485	-2.50007	0.455579	-5.30795	1.10863e-07	3.11978e-06
itf03g21920	DROUGHT SENSITIVE	Chr03	17441159	17448899	82.2072	2.11377	0.369647	5.70421	1.16882e-08	5.38072e-07
itf03g22310	cycloartenol synthase	Chr03	17787134	17796993	144.942	-2.48555	0.758626	-3.38237	0.000718645	0.00339922
itf03g22450	cinnamate-4-hydroxylase	Chr03	17973945	17975648	249.265	2.29999	0.625022	3.60684	0.000309949	0.0017298
itf03g23640	Leucine-rich receptor-like protein kinase family protein	Chr03	19227345	19230357	149.332	-4.15046	0.68262	-6.36369	1.96963e-10	2.248e-08
itf03g23900	C2H2-like zinc finger protein	Chr03	19556091	19558045	23.208	2.42744	0.410589	5.84349	5.11197e-09	2.84399e-07
itf03g24270	C2H2-like zinc finger protein	Chr03	19871006	19874522	14.7721	2.66991	0.566814	4.58892	4.4554e-06	5.70105e-05
itf03g24570	CBS domain-containing protein with a domain of unknown function (DUF21)	Chr03	20196129	20201162	150.541	-2.92603	0.703939	-4.18947	2.79602e-05	0.000248747
itf03g24780	multidrug resistance-associated protein	Chr03	20503416	20508475	359.605	-3.20632	0.457583	-7.03797	1.95066e-12	5.76378e-10
itf03g24790	hypothetical protein	Chr03	20508675	20510622	1.73974	-2.67746	0.718685	-3.03686	0.00239054	0.00896891
itf03g24810	multidrug resistance-associated protein	Chr03	20527583	20534574	2160.96	-2.06255	0.461558	-4.47637	7.59228e-06	8.66158e-05
itf03g24980	UbiA prenyltransferase family protein	Chr03	20723267	20728056	32.967	2.25669	0.424343	5.2803	1.2897e-07	3.52115e-06
itf03g24990	ARABIDOPSIS TRITHORAX-RELATED PROTEIN	Chr03	20747714	20750543	13.4152	3.0309	0.585762	4.99304	5.94365e-07	1.17168e-05
itf03g25520	Haloacid dehalogenase-like hydrolase (HAD) superfamily protein	Chr03	21448906	21450697	72.9592	-3.3678	0.693294	-4.89883	9.64093e-07	1.72565e-05
itf03g26260	hypothetical protein	Chr03	22336786	22337649	243.776	4.08518	0.718799	5.39813	6.73409e-08	2.08961e-06
itf03g27140	Aluminium activated malate transporter family protein	Chr03	23385547	23388343	6.05237	3.25242	0.741723	3.93488	8.32384e-05	0.000600218
itf03g28790	cytochrome P450, family 96, subfamily A, polypeptide	Chr03	25715003	25717026	143.566	-3.84031	0.66309	-5.93458	2.94596e-09	1.83042e-07
itf03g29250	hypothetical protein	Chr03	26234928	26236064	4.33099	-2.10952	0.71678	-3.09915	0.00194074	0.00758002
itf03g29420	cytochrome P450, family 71, subfamily B, polypeptide	Chr03	26420149	26425083	46.8941	-3.98928	0.742394	-5.41136	6.25477e-08	1.96148e-06
itf03g29430	cytochrome P450, family 71, subfamily B, polypeptide	Chr03	26444043	26445850	69.6516	2.65546	0.543099	4.8777	1.07333e-06	1.87355e-05
itf03g29480	Late embryogenesis abundant (LEA) protein-related	Chr03	26518997	26519267	5.34648	3.10306	0.75388	3.63928	0.000273399	0.00156489
itf03g29770	cytochrome P450, family 71, subfamily B, polypeptide	Chr03	26865967	26867753	15.9481	-3.1209	0.604929	-4.96182	6.98347e-07	1.34379e-05
itf03g29790	Cytochrome P450 superfamily protein	Chr03	26884290	26885887	13.4331	-2.92411	0.620616	-4.57031	4.86998e-06	6.11461e-05
itf03g29910	DNAse I-like superfamily protein	Chr03	27020434	27024321	12.9503	-2.05258	0.677414	-3.06947	0.00214438	0.00820957
itf03g30440	Auxin-responsive GH3 family protein	Chr03	27692873	27695003	91.5584	-4.06037	0.765055	-5.33881	9.356e-08	2.70471e-06
itf03g30450	Auxin-responsive GH3 family protein	Chr03	27712599	27715022	52.315	-4.37286	0.75541	-5.72695	1.02254e-08	4.83849e-07
itf03g30640	conserved hypothetical protein	Chr03	27854414	27856124	61.6524	-2.37009	0.573365	-4.12281	3.74273e-05	0.000314571
itf03g31190	1-amino-cyclopropane-1-carboxylate synthase	Chr03	28240001	28241660	153.793	2.40272	0.586202	4.05969	4.91382e-05	0.000389836
itf04g00340	Cytochrome b561/ferric reductase transmembrane with DOMON related domain	Chr04	172899	174538	40.3304	2.10183	0.60336	3.48617	0.000489985	0.00249655	FYTHA	1
itf04g00540	TRICHOME BIREFRINGENCE-LIKE	Chr04	275684	277262	130.324	2.19374	0.395616	5.53017	3.19919e-08	1.1575e-06	FYTHA	1
itf04g00780	chitinase A	Chr04	368973	370242	340.828	-4.87844	0.632923	-7.85557	3.97954e-15	5.03942e-12	FYTHA	1
itf04g00790	chitinase A	Chr04	372511	377858	6.742	2.3628	0.651823	3.48397	0.000494044	0.00251255	FYTHA	1
itf04g01110	cysteine synthase C1	Chr04	527298	529507	40.4508	-3.52507	0.675674	-5.05713	4.25616e-07	9.01147e-06	FYTHA	1
itf04g01140	Major facilitator superfamily protein	Chr04	539594	546232	39.7501	3.56146	0.65335	5.29967	1.1601e-07	3.23719e-06	FYTHA	1
itf04g02240	Leucine-rich repeat protein kinase family protein	Chr04	1139401	1142559	30.7609	3.34075	0.536054	6.08345	1.17624e-09	9.09903e-08	FYTHA	1
itf04g02430	PLATZ transcription factor family protein	Chr04	1270240	1271705	13.5501	2.74889	0.593453	4.49554	6.93937e-06	8.09025e-05	FYTHA	1
itf04g02690	squamosa promoter binding protein-like	Chr04	1473765	1476336	24.6743	2.24623	0.63307	3.4587	0.000542784	0.00271627	FYTHA	1
itf04g02870	ethylene-responsive element binding factor	Chr04	1606693	1607299	1.77964	-2.60006	0.789653	-3.28481	0.00102053	0.00451186	FYTHA	1
itf04g03080	WRKY family transcription factor	Chr04	1715697	1720052	115.545	2.0586	0.537594	3.83927	0.000123403	0.000821646	FYTHA	1
itf04g03500	multidrug resistance-associated protein	Chr04	1988849	1997949	1864.57	-3.31552	0.501356	-6.645	3.03211e-11	5.71864e-09	FYTHA	1
itf04g04190	Cysteine/Histidine-rich C1 domain family protein	Chr04	2357965	2358673	1.68882	-2.93738	0.771594	-3.6542	0.000257982	0.00149141	FYTHA	1
itf04g04640	hypothetical protein	Chr04	2608328	2609696	273.215	-3.96268	0.674023	-5.81368	6.11146e-09	3.2636e-07	FYTHA_TNR_NCYTHA	1_3_2
itf04g05010	polyamine oxidase	Chr04	2827669	2834249	355.326	-2.53093	0.472732	-5.3477	8.90784e-08	2.59744e-06	FYTHA_TNR_NCYTHA	1_3_2
itf04g05190	AGAMOUS-like	Chr04	2913130	2917386	16.3956	2.52864	0.543506	4.54305	5.54472e-06	6.77623e-05	FYTHA_TNR_NCYTHA	1_3_2
itf04g05700	Eukaryotic aspartyl protease family protein	Chr04	3322299	3324655	431.474	2.34315	0.515462	4.51086	6.45642e-06	7.6411e-05	FYTHA_TNR_NCYTHA	1_3_2
itf04g05790	exocyst subunit exo70 family protein H4	Chr04	3396909	3398854	61.7171	-3.53122	0.543528	-6.43422	1.24106e-10	1.65846e-08	FYTHA_TNR_NCYTHA_NONC	1_3_2_3
itf04g06110	Leucine-rich receptor-like protein kinase family protein	Chr04	3559281	3562395	30.1688	-2.12295	0.578904	-3.5934	0.000326397	0.00180393	FYTHA_TNR_NCYTHA_NONC_NOCR	1_3_2_3_4
itf04g06230	Protein kinase family protein with leucine-rich repeat domain	Chr04	3622285	3624951	18.4058	-2.26494	0.329087	-6.7842	1.16729e-11	2.69927e-09	FYTHA_TNR_NCYTHA_NONC_NOCR	1_3_2_3_4
itf04g06280	minichromosome maintenance	Chr04	3671992	3673867	9.18201	2.00156	0.52643	3.714	0.000204009	0.00123021	FYTHA_TNR_NCYTHA_NONC_NOCR	1_3_2_3_4
itf04g06440	Seven transmembrane MLO family protein	Chr04	3779749	3784596	123.674	-2.43073	0.582302	-4.19011	2.78822e-05	0.000248483	FYTHA_TNR_NCYTHA_NONC_NOCR	1_3_2_3_4
itf04g06540	plasma membrane intrinsic protein 2;5	Chr04	3866392	3868420	2219.76	-2.26083	0.566307	-3.98673	6.69913e-05	0.000501689	FYTHA_TNR_NCYTHA_NONC_NOCR	1_3_2_3_4
itf04g06550	plasma membrane intrinsic protein 2;5	Chr04	3872486	3874383	889.12	-2.39093	0.567712	-4.20994	2.55433e-05	0.000231877	FYTHA_TNR_NCYTHA_NONC_NOCR	1_3_2_3_4
itf04g07250	ATPase E1-E2 type family protein / haloacid dehalogenase-like hydrolase family protein	Chr04	4416073	4419094	221.589	-3.05655	0.444127	-6.8851	5.77468e-12	1.44874e-09	FYTHA_TNR_NCYTHA_NOCR	1_3_2_4
itf04g07350	MLP-like protein	Chr04	4490591	4491299	6.64366	2.35719	0.548744	4.14252	3.43507e-05	0.000293915	FYTHA_TNR_NCYTHA_NOCR	1_3_2_4
itf04g07360	hypothetical protein	Chr04	4494407	4494705	4.91908	-2.3348	0.584828	-3.75363	0.000174295	0.00108244	FYTHA_TNR_NCYTHA_NOCR	1_3_2_4
itf04g07540	ankyrin repeat family protein	Chr04	4646514	4649413	1.2472	2.69536	0.780621	3.2686	0.00108081	0.00473196	FYTHA_TNR_NCYTHA_NOCR	1_3_2_4
itf04g07590	Serine protease inhibitor, potato inhibitor I-type family protein	Chr04	4684597	4685250	10456.1	2.7153	0.490606	5.49577	3.89009e-08	1.347e-06	FYTHA_TNR_NCYTHA_NOCR	1_3_2_4
itf04g07790	Integrase-type DNA-binding superfamily protein	Chr04	4865667	4866078	8.48873	3.26656	0.787678	4.12531	3.70243e-05	0.000312072	FYTHA_TNR_NCYTHA_NOCR	1_3_2_4
itf04g07800	ethylene response factor	Chr04	4899020	4900027	20.9479	-2.78613	0.708343	-3.96425	7.36268e-05	0.000541213	FYTHA_TNR_NCYTHA_NOCR	1_3_2_4
itf04g08020	actin depolymerizing factor	Chr04	5026225	5028164	407.16	2.47509	0.524554	4.71457	2.42222e-06	3.54356e-05	FYTHA_TNR_NCYTHA_NOCR	1_3_2_4
itf04g08090	Protein of unknown function (DUF640)	Chr04	5099415	5100603	83.5321	4.03733	0.735319	5.42219	5.88746e-08	1.86166e-06	FYTHA_TNR_NCYTHA_NOCR	1_3_2_4
itf04g08490	TLD-domain containing nucleolar protein	Chr04	5386158	5390282	32.2832	2.11241	0.483001	4.32521	1.52385e-05	0.000152002	FYTHA_TNR_NCYTHA_NOCR	1_3_2_4
itf04g08500	plasmodesmata-located protein	Chr04	5393453	5395697	54.5041	2.01164	0.40654	4.92279	8.532e-07	1.56585e-05	FYTHA_TNR_NCYTHA_NOCR	1_3_2_4
itf04g08760	myosin XI B	Chr04	5644811	5647274	3.98175	2.51931	0.694832	3.1651	0.00155031	0.0063203	FYTHA_TNR_NCYTHA_NOCR	1_3_2_4
itf04g08920	DUF4487 domain containing protein	Chr04	5812002	5817731	15.9948	2.46593	0.485244	4.99321	5.93826e-07	1.17148e-05	FYTHA_TNR_NCYTHA_NOCR	1_3_2_4
itf04g08970	Pectin lyase-like superfamily protein	Chr04	5868002	5868404	7.05894	2.69497	0.632206	4.06436	4.81651e-05	0.000384064	FYTHA_NCYTHA_NOCR	1_2_4
itf04g08990	Pectin lyase-like superfamily protein	Chr04	5882332	5887010	74.2657	2.55579	0.467914	5.42966	5.64608e-08	1.80464e-06	FYTHA_NCYTHA_NOCR	1_2_4
itf04g09030	purple acid phosphatase	Chr04	5923009	5932697	43.5647	2.62018	0.659133	3.87083	0.000108468	0.000742083	FYTHA_NCYTHA_NOCR	1_2_4
itf04g09070	S-adenosyl-L-methionine-dependent methyltransferases superfamily protein	Chr04	5982981	5987392	45.6871	-3.39553	0.613892	-5.4871	4.08583e-08	1.40199e-06	FYTHA_NCYTHA_NOCR	1_2_4
itf04g10120	NAD(P)-linked oxidoreductase superfamily protein	Chr04	6957266	6960549	28.2758	-2.74695	0.511902	-5.30706	1.1141e-07	3.13185e-06	FYTHA_NCYTHA_NOCR	1_2_4
itf04g10150	conserved hypothetical protein	Chr04	6993620	6996279	71.2113	-2.88194	0.473616	-6.06541	1.31621e-09	9.74984e-08	FYTHA_NCYTHA_NOCR	1_2_4
itf04g10320	glycine-rich protein 3 short isoform	Chr04	7174492	7175804	14.0051	-2.81941	0.675274	-4.11388	3.89056e-05	0.000323824	FYTHA_NCYTHA	1_2
itf04g10400	conserved hypothetical protein	Chr04	7261127	7265148	14.0201	2.01122	0.574353	3.41239	0.000643955	0.00310622	FYTHA_NCYTHA	1_2
itf04g10630	Leucine-rich repeat protein kinase family protein	Chr04	7473135	7476577	2.41637	-2.51758	0.718897	-3.36533	0.000764535	0.00357504	FYTHA_NCYTHA	1_2
itf04g11050	ralf-like	Chr04	7901237	7902153	108.868	2.62125	0.471619	5.50597	3.67141e-08	1.29316e-06	FYTHA_NCYTHA	1_2
itf04g11470	Protein kinase superfamily protein	Chr04	8467261	8474378	124.721	3.51747	0.643293	5.35007	8.79189e-08	2.57209e-06	FYTHA_NCYTHA	1_2
itf04g11990	Bifunctional inhibitor/lipid-transfer protein/seed storage 2S albumin superfamily protein	Chr04	9055097	9055702	933.041	2.03029	0.56812	3.49294	0.000477738	0.00244599	FYTHA_NCYTHA	1_2
itf04g12060	Glycosyl hydrolase superfamily protein	Chr04	9133177	9135916	249.638	-2.19407	0.675287	-3.46165	0.000536882	0.0026938	FYTHA_NCYTHA	1_2
itf04g12280	Leucine-rich receptor-like protein kinase family protein	Chr04	9426724	9430738	273.568	2.29087	0.445877	5.12393	2.99227e-07	6.80115e-06	FYTHA_NCYTHA	1_2
itf04g12630	inositol transporter	Chr04	9864702	9871580	1143.26	-2.18431	0.28705	-7.6118	2.70304e-14	1.99672e-11	FYTHA_NCYTHA	1_2
itf04g13060	RING/U-box superfamily protein	Chr04	10362190	10365439	94.6713	2.39484	0.429534	5.56082	2.68517e-08	1.01e-06	FYTHA_NCYTHA	1_2
itf04g13570	debranching enzyme	Chr04	11011487	11014240	409.136	2.71158	0.415715	6.51365	7.33442e-11	1.13398e-08	FYTHA_NCYTHA	1_2
itf04g13710	hypothetical protein	Chr04	11196817	11197105	917.182	-2.67306	0.55222	-4.82902	1.37206e-06	2.26067e-05	FYTHA_NCYTHA	1_2
itf04g13910	O-Glycosyl hydrolases family 17 protein	Chr04	11538721	11545119	313.928	2.74915	0.369664	7.42664	1.1139e-13	6.29139e-11	FYTHA_NCYTHA	1_2
itf04g14540	glycosyl hydrolase 9B1	Chr04	12459892	12468913	27.4479	2.1583	0.505831	4.21999	2.44315e-05	0.000223728	NCYTHA	2
itf04g15020	Major facilitator superfamily protein	Chr04	13061323	13067472	246.824	-2.46317	0.479388	-5.13806	2.77594e-07	6.45849e-06	NCYTHA	2
itf04g15860	conserved hypothetical protein	Chr04	14257173	14264252	9.43196	3.49517	0.66611	4.8671	1.13248e-06	1.9551e-05	NCYTHA	2
itf04g15980	alpha/beta-Hydrolases superfamily protein	Chr04	14564262	14570443	1339.34	-2.06089	0.363928	-5.67486	1.38805e-08	6.06114e-07	NCYTHA	2
itf04g16250	Protein phosphatase 2C family protein	Chr04	14990620	14992565	782.327	-2.36284	0.539316	-4.39665	1.09933e-05	0.000116845	NCYTHA	2
itf04g17690	Adenosylmethionine decarboxylase family protein	Chr04	17417495	17418527	85.1165	-2.14589	0.423321	-5.06579	4.06708e-07	8.64556e-06	NCYTHA	2
itf04g18170	Protein of unknown function (DUF581)	Chr04	18238719	18242006	70.6666	-2.23001	0.4044	-5.50905	3.60782e-08	1.27753e-06	NCYTHA	2
itf04g18450	Major facilitator superfamily protein	Chr04	18657093	18660720	62.2444	2.9419	0.558361	5.12995	2.89821e-07	6.64414e-06	NCYTHA	2
itf04g18730	hypothetical protein	Chr04	19166835	19167463	25.8087	2.67966	0.557988	4.70082	2.5912e-06	3.73889e-05	NCYTHA	2
itf04g19510	cytochrome P450, family 716, subfamily A, polypeptide	Chr04	20079871	20082038	127.118	2.39213	0.574059	4.14568	3.38808e-05	0.000290455	NCYTHA	2
itf04g19530	cytochrome P450, family 716, subfamily A, polypeptide	Chr04	20100463	20100966	20.6958	3.18299	0.67094	4.61093	4.00865e-06	5.25133e-05	NCYTHA	2
itf04g19540	cytochrome P450, family 716, subfamily A, polypeptide	Chr04	20102584	20104130	51.7072	2.02263	0.584487	3.44719	0.000566445	0.00281245	NCYTHA	2
itf04g20110	NAD(P)-binding Rossmann-fold superfamily protein	Chr04	21221081	21222786	32.7052	2.62835	0.609992	4.25558	2.08506e-05	0.000196346	NCYTHA	2
itf04g20120	conserved hypothetical protein	Chr04	21222539	21226053	1293.88	-2.85768	0.359123	-7.96278	1.68214e-15	2.35438e-12	NCYTHA	2
itf04g21590	Potato type II proteinase inhibitor family domain containing protein	Chr04	23248968	23250063	44.8371	-2.38552	0.762833	-3.1025	0.00191891	0.00751407	NCYTHA	2
itf04g22010	GDSL-like Lipase/Acylhydrolase superfamily protein	Chr04	23747024	23749557	4.75938	3.89354	0.804953	4.17949	2.92168e-05	0.000257699	NCYTHA	2
itf04g22100	Cytochrome P450 superfamily protein	Chr04	23805381	23808353	18.6817	2.09896	0.575779	3.58713	0.000334337	0.00183746	NCYTHA	2
itf04g22440	Protein phosphatase 2C family protein	Chr04	24175470	24177968	17.0165	-2.81531	0.597485	-4.59078	4.41588e-06	5.66857e-05	NCYTHA	2
itf04g23080	Protein of Unknown Function (DUF239)	Chr04	24982330	24985727	1176.3	-2.40023	0.522533	-4.57277	4.81326e-06	6.06055e-05	NCYTHA	2
itf04g23270	Putative lysine decarboxylase family protein	Chr04	25106499	25113583	60.7142	-2.25824	0.39213	-5.74419	9.23598e-09	4.5316e-07	NCYTHA	2
itf04g23280	calcium ion binding	Chr04	25113837	25116376	227.513	2.05015	0.346324	5.91263	3.36682e-09	2.02565e-07	NCYTHA	2
itf04g23650	HCO3- transporter family	Chr04	25404144	25408945	491.935	2.47287	0.459572	5.35369	8.61768e-08	2.53226e-06	NCYTHA	2
itf04g23780	WRKY DNA-binding protein	Chr04	25495104	25496224	15.2717	-2.06531	0.599429	-3.38569	0.000710005	0.00336323	NCYTHA	2
itf04g23790	conserved hypothetical protein	Chr04	25500311	25501359	4.37037	-2.46209	0.644522	-3.50847	0.000450695	0.00233678	NCYTHA	2
itf04g23880	Tetratricopeptide repeat (TPR)-like superfamily protein	Chr04	25542728	25545033	124	2.66619	0.502267	5.27832	1.30376e-07	3.54146e-06	NCYTHA	2
itf04g24100	Pectin lyase-like superfamily protein	Chr04	25638263	25642747	493.963	2.68696	0.429454	6.24261	4.30325e-10	4.17651e-08	NCYTHA	2
itf04g24180	Plant invertase/pectin methylesterase inhibitor superfamily	Chr04	25699690	25702826	87.8987	2.25413	0.485501	4.60595	4.10584e-06	5.3418e-05	NCYTHA	2
itf04g24400	HSP20-like chaperones superfamily protein	Chr04	25866801	25868798	32.7455	3.12152	0.533618	5.77024	7.91607e-09	4.0174e-07	NCYTHA	2
itf04g24460	TSPO(outer membrane tryptophan-rich sensory protein)-related	Chr04	25915088	25916150	3.25797	-2.48923	0.723771	-3.35658	0.000789124	0.00366938	NCYTHA	2
itf04g24550	nuclear factor Y, subunit B5	Chr04	25970389	25970917	17.2176	-3.13417	0.536212	-5.5088	3.61284e-08	1.27761e-06	NCYTHA	2
itf04g24730	BRCT domain-containing DNA repair protein	Chr04	26089967	26094285	2.72359	3.0611	0.757703	3.70365	0.000212518	0.00127086	NCYTHA	2
itf04g25310	hypothetical protein	Chr04	26306984	26307302	13.7292	-2.63288	0.611591	-4.21164	2.53527e-05	0.000230576	NCYTHA	2
itf04g25510	Terpenoid cyclases/Protein prenyltransferases superfamily protein	Chr04	26435454	26442275	57.4527	-2.03985	0.506833	-4.00367	6.23664e-05	0.000473662	NCYTHA	2
itf04g25550	ovate family protein	Chr04	26457259	26458315	11.2823	2.66739	0.518041	4.95312	7.30324e-07	1.39023e-05	NCYTHA	2
itf04g25560	Seed maturation protein	Chr04	26463996	26465261	6.70478	-2.05893	0.518538	-3.82929	0.000128516	0.000849733	NCYTHA	2
itf04g25730	C2H2 and C2HC zinc fingers superfamily protein	Chr04	26585701	26589558	49.1512	3.34352	0.679867	4.88289	1.04541e-06	1.83866e-05	NCYTHA	2
itf04g25980	cytochrome P450, family 94, subfamily B, polypeptide	Chr04	26762438	26764345	10.6024	-2.2549	0.694212	-3.2105	0.00132502	0.00556041	NCYTHA	2
itf04g26140	2-oxoglutarate (2OG) and Fe(II)-dependent oxygenase superfamily protein	Chr04	26928019	26929309	193.033	-2.34396	0.784757	-3.79691	0.000146509	0.000941774	NCYTHA	2
itf04g26230	Protein of unknown function (DUF640)	Chr04	26984419	26985460	103.041	4.00541	0.702034	5.80842	6.30654e-09	3.3475e-07	NCYTHA	2
itf04g26440	breast cancer associated RING	Chr04	27104921	27109760	51.7865	2.7178	0.401773	6.72096	1.80527e-11	3.76943e-09	NCYTHA	2
itf04g26580	Leucine-rich repeat transmembrane protein kinase family protein	Chr04	27216291	27219971	84.7917	2.45534	0.573314	4.18965	2.79381e-05	0.000248647	NCYTHA	2
itf04g26660	RmlC-like cupins superfamily protein	Chr04	27259710	27260491	398.481	-2.55427	0.446925	-5.72392	1.04095e-08	4.90813e-07	NCYTHA	2
itf04g26810	phytochrome interacting factor 3-like	Chr04	27399841	27403233	125.843	3.09732	0.515338	5.97262	2.33478e-09	1.52928e-07	NCYTHA	2
itf04g26940	Tetratricopeptide repeat (TPR)-like superfamily protein	Chr04	27490055	27492757	9.13653	2.14747	0.702566	3.03112	0.00243648	0.00910658	NCYTHA	2
itf04g27060	DUF4228 domain containing protein	Chr04	27567553	27568879	10.7092	-2.72618	0.546342	-4.72148	2.34131e-06	3.45519e-05	NCYTHA_TNR	2_4
itf04g27190	Acyl-ACP thioesterase	Chr04	27646191	27649618	26.0519	2.1546	0.432468	4.93881	7.86013e-07	1.46993e-05	NCYTHA_TNR	2_4
itf04g27540	Actin binding Calponin homology (CH) domain-containing protein	Chr04	27851125	27857464	59.8518	2.09924	0.447189	4.65928	3.17321e-06	4.39506e-05	NCYTHA_TNR	2_4
itf04g27790	RECQ helicase L4B	Chr04	27986259	27992951	24.0594	2.28176	0.462319	4.88007	1.0605e-06	1.85538e-05	NCYTHA_TNR	2_4
itf04g28000	ovate family protein	Chr04	28121492	28122206	12.5228	3.22536	0.579983	5.31209	1.08375e-07	3.06273e-06	NCYTHA_TNR	2_4
itf04g28160	HXXXD-type acyl-transferase family protein	Chr04	28251447	28253108	385.772	-2.5138	0.382003	-6.58786	4.4622e-11	7.55817e-09	NCYTHA_TNR	2_4
itf04g28300	laccase	Chr04	28326222	28328495	230.875	3.4265	0.488306	6.98611	2.82606e-12	8.08101e-10	NCYTHA_TNR	2_4
itf04g28370	UDP-Glycosyltransferase superfamily protein	Chr04	28362610	28369636	42.3952	-2.17795	0.370855	-5.84787	4.97903e-09	2.7934e-07	NCYTHA_TNR	2_4
itf04g28700	2-oxoglutarate (2OG) and Fe(II)-dependent oxygenase superfamily protein	Chr04	28587995	28592934	29.0512	-2.32678	0.504621	-4.55699	5.18925e-06	6.43584e-05	NCYTHA_TNR	2_4
itf04g29170	UDP-glucosyl transferase 76E1	Chr04	28874097	28876221	24.2212	-2.08615	0.58163	-3.59138	0.000328931	0.00181605	NCYTHA_TNR	2_4
itf04g29300	hypothetical protein	Chr04	28924413	28925150	509.306	3.28766	0.509821	6.42786	1.2941e-10	1.68696e-08	NCYTHA_TNR	2_4
itf04g29310	sterol 4-alpha-methyl-oxidase 2-1	Chr04	28926868	28934069	372.249	2.10847	0.373527	5.63422	1.75849e-08	7.28404e-07	NCYTHA_TNR	2_4
itf04g29380	ZRT/IRT-like protein	Chr04	28975210	28977244	400.806	-3.38575	0.652266	-5.18375	2.17469e-07	5.34488e-06	NCYTHA_TNR	2_4
itf04g29540	expansin A4	Chr04	29088097	29089788	260.545	3.93918	0.536777	7.23822	4.54613e-13	1.77787e-10	NCYTHA_TNR	2_4
itf04g29640	cytochrome P450, family 71, subfamily B, polypeptide	Chr04	29142934	29148025	70.1012	-2.68503	0.606397	-4.3983	1.09102e-05	0.000116141	NCYTHA_TNR	2_4
itf04g29750	conserved hypothetical protein	Chr04	29207834	29210457	118.434	2.28632	0.383233	5.9557	2.58957e-09	1.64747e-07	NCYTHA_TNR	2_4
itf04g29780	heat shock protein 18.2	Chr04	29226789	29227248	908.331	2.18651	0.566411	3.9476	7.89374e-05	0.000573547	NCYTHA_TNR	2_4
itf04g29820	conserved hypothetical protein	Chr04	29258846	29260466	569.24	2.19373	0.381199	5.74638	9.11743e-09	4.4817e-07	NCYTHA_TNR	2_4
itf04g29860	Pathogenesis-related thaumatin superfamily protein	Chr04	29274927	29276091	381.261	2.14395	0.432135	4.95434	7.25745e-07	1.38349e-05	NCYTHA_TNR	2_4
itf04g29950	ACT domain-containing protein	Chr04	29330531	29333693	124.051	2.85811	0.449517	6.3413	2.27832e-10	2.53503e-08	NCYTHA_TNR	2_4
itf04g30070	gamma tonoplast intrinsic protein	Chr04	29386762	29387813	781.362	-2.67478	0.661772	-4.02813	5.62225e-05	0.000435769	NCYTHA_TNR	2_4
itf04g30310	Major facilitator superfamily protein	Chr04	29559047	29561415	130.961	-2.20288	0.602587	-3.69758	0.000217666	0.00129552	NCYTHA_TNR	2_4
itf04g30390	ROP interactive partner	Chr04	29602959	29606544	30.7179	4.00898	0.675055	5.68149	1.33526e-08	5.9181e-07	NCYTHA_TNR	2_4
itf04g30570	Seven transmembrane MLO family protein	Chr04	29741452	29747770	2.78223	-3.29397	0.696138	-3.76118	0.000169115	0.00105602	NCYTHA_TNR	2_4
itf04g30580	Seven transmembrane MLO family protein	Chr04	29753790	29758963	31.6712	-3.69119	0.627256	-5.68038	1.34394e-08	5.93041e-07	NCYTHA_TNR	2_4
itf04g30900	Kiwellin	Chr04	29960355	29961757	68.3995	3.58254	0.713423	5.16289	2.43166e-07	5.83621e-06	NCYTHA_TNR	2_4
itf04g30970	5'-AMP-activated protein kinase beta-2 subunit protein	Chr04	30002121	30002481	8.38576	2.65894	0.643391	3.89328	9.88979e-05	0.000688577	NCYTHA_TNR	2_4
itf04g31250	Protein of unknown function (DUF1635)	Chr04	30180760	30182227	429.067	2.07557	0.341714	6.06617	1.30999e-09	9.73089e-08	NCYTHA_TNR	2_4
itf04g31540	Cyclin-dependent protein kinase inhibitor SMR2	Chr04	30469277	30469646	1.67601	-2.93478	0.797516	-3.42499	0.000614824	0.0029967	NCYTHA_TNR	2_4
itf04g31790	centroradialis	Chr04	30678612	30679772	296.97	-3.06411	0.640734	-5.11047	3.21366e-07	7.20219e-06	NCYTHA	2
itf04g31800	AMP-dependent synthetase and ligase family protein	Chr04	30686559	30688810	43.73	-2.37937	0.639072	-3.81518	0.000136083	0.000886321	NCYTHA	2
itf04g31880	UDP-glucosyl transferase 73C6	Chr04	30731503	30732970	1.51553	2.59477	0.749936	3.1233	0.00178834	0.00709494	NCYTHA	2
itf04g31900	UDP-Glycosyltransferase superfamily protein	Chr04	30740046	30741657	13.2597	2.09033	0.648834	3.20048	0.00137197	0.005724	NCYTHA	2
itf04g32360	plant U-box	Chr04	31020942	31022503	26.7777	-3.45108	0.749642	-4.44406	8.82769e-06	9.80187e-05	NCYTHA	2
itf04g32450	Protein of unknown function (DUF3049)	Chr04	31089176	31091489	59.2054	2.12551	0.539301	3.94681	7.91991e-05	0.000575291	NCYTHA	2
itf04g32660	Leucine-rich receptor-like protein kinase family protein	Chr04	31268714	31273481	77.2451	3.21895	0.510989	6.21665	5.07877e-10	4.72237e-08	NCYTHA	2
itf04g32830	Galactose oxidase/kelch repeat superfamily protein	Chr04	31362137	31363830	48.1063	2.19412	0.358995	6.08665	1.153e-09	8.96542e-08	NCYTHA	2
itf04g34240	lipoxygenase	Chr04	32250897	32261521	414.804	-2.34508	0.509163	-4.61054	4.0162e-06	5.25604e-05
itf04g34250	receptor-like protein kinase	Chr04	32261707	32264140	70.4871	-3.05495	0.48593	-6.24558	4.22235e-10	4.113e-08
itf04g34280	NB-ARC domain-containing disease resistance protein	Chr04	32278732	32282551	46.3624	-3.11625	0.638005	-4.88946	1.01113e-06	1.79021e-05
itf04g34340	Peroxidase superfamily protein	Chr04	32364676	32366049	971.555	-4.27963	0.743952	-6.32338	2.55905e-10	2.77767e-08
itf04g34460	Bifunctional inhibitor/lipid-transfer protein/seed storage 2S albumin superfamily protein	Chr04	32431464	32432088	37.1098	-2.85508	0.373949	-7.5526	4.2666e-14	2.98584e-11
itf05g00250	hypothetical protein	Chr05	346024	346570	14.3305	2.53552	0.474598	5.21576	1.83061e-07	4.68542e-06
itf05g00320	cell wall-associated kinase	Chr05	385432	388569	3.71153	-2.59033	0.736147	-3.20393	0.00135565	0.00566746
itf05g01040	Squamosa promoter-binding protein-like (SBP domain) transcription factor family protein	Chr05	819604	822737	2.93611	-2.49488	0.692106	-3.2194	0.00128458	0.0054241
itf05g01060	hypothetical protein	Chr05	861699	861993	4.43096	2.62263	0.644079	3.73558	0.000187284	0.00114587
itf05g01070	K-box region and MADS-box transcription factor family protein	Chr05	874303	876894	20.9043	2.79042	0.645229	4.26797	1.97256e-05	0.00018741
itf05g01180	Acyl transferase/acyl hydrolase/lysophospholipase superfamily protein	Chr05	959625	961391	17.8669	-2.23355	0.62488	-3.54805	0.000388092	0.00207406
itf05g01190	Acyl transferase/acyl hydrolase/lysophospholipase superfamily protein	Chr05	964433	966751	2865.89	-3.62888	0.548504	-6.68123	2.36949e-11	4.70237e-09
itf05g01840	hypothetical protein	Chr05	1454281	1456491	32.1418	3.29818	0.703542	4.5361	5.73043e-06	6.96477e-05
itf05g02260	expansin A8	Chr05	1730929	1732521	59.6422	2.27303	0.554555	4.01205	6.01941e-05	0.000460645
itf05g02450	conserved hypothetical protein	Chr05	1905646	1906413	14.9122	-2.93557	0.680368	-4.19189	2.76642e-05	0.000246953
itf05g02570	biotin/lipoyl attachment domain-containing protein	Chr05	1994456	1998987	88.4718	2.04402	0.402113	5.06688	4.04399e-07	8.62404e-06
itf05g02890	FBD, F-box and Leucine Rich Repeat domains containing protein	Chr05	2292536	2294714	9.39767	2.5559	0.551412	4.47095	7.7874e-06	8.83491e-05
itf05g02960	Clathrin light chain protein	Chr05	2353183	2357260	6.70902	2.87391	0.639964	4.18669	2.83048e-05	0.000251166
itf05g03200	UDP-glucosyl transferase 85A2	Chr05	2537347	2540549	15.6937	-2.07713	0.49837	-4.11294	3.90646e-05	0.000324741
itf05g03260	conserved hypothetical protein	Chr05	2563461	2566023	280.716	2.52526	0.453404	5.53992	3.02607e-08	1.10085e-06
itf05g03460	lateral organ boundaries-domain	Chr05	2796916	2797658	8.09791	-2.73069	0.618042	-3.90482	9.42961e-05	0.000663741
itf05g03800	armadillo repeat kinesin	Chr05	3338314	3346234	34.1894	2.48879	0.504428	4.89584	9.78873e-07	1.74823e-05
itf05g04190	actin-12	Chr05	3931059	3934175	259.386	2.82334	0.471055	5.96607	2.43036e-09	1.58244e-07
itf05g04330	delta(3), delta(2)-enoyl CoA isomerase	Chr05	4021139	4021835	95.1756	-2.4196	0.374187	-6.4532	1.09513e-10	1.52475e-08
itf05g04360	nodulin MtN21 /EamA-like transporter family protein	Chr05	4058907	4061284	24.5013	-3.4202	0.762892	-4.43655	9.14108e-06	0.000100909
itf05g04370	nodulin MtN21 /EamA-like transporter family protein	Chr05	4064976	4066374	12.2178	-2.54262	0.808167	-3.22765	0.00124813	0.00529791
itf05g04460	nodulin MtN21 /EamA-like transporter family protein	Chr05	4127681	4130594	90.386	-3.47017	0.66564	-5.13222	2.86346e-07	6.58709e-06
itf05g04470	nodulin MtN21 /EamA-like transporter family protein	Chr05	4151912	4153279	348.803	-2.81717	0.662395	-4.25154	2.12307e-05	0.000198939
itf05g04700	C2H2-type zinc finger family protein	Chr05	4394433	4395033	19.5878	-3.13108	0.624886	-4.88471	1.03583e-06	1.82423e-05
itf05g04890	alpha/beta-Hydrolases superfamily protein	Chr05	4572157	4578467	31.9851	2.22513	0.532293	4.11957	3.79586e-05	0.000317932
itf05g04910	exocyst subunit exo70 family protein H2	Chr05	4595318	4597281	12.33	-2.39295	0.595862	-3.88986	0.000100301	0.000696606
itf05g05630	hypothetical protein	Chr05	5353177	5353459	13.6248	2.21472	0.653259	3.34565	0.00082089	0.0037886
itf05g05700	TRICHOME BIREFRINGENCE-LIKE	Chr05	5444110	5447873	95.5298	2.16137	0.446877	4.82384	1.40819e-06	2.31161e-05
itf05g06000	Glycosyl hydrolases family 31 protein	Chr05	5696587	5702846	11.6287	3.09136	0.597821	4.97026	6.68641e-07	1.29789e-05
itf05g08760	Leucine-rich repeat (LRR) family protein	Chr05	9905041	9906482	44.5946	3.09266	0.552221	5.51581	3.47178e-08	1.23264e-06
itf05g08920	NB-ARC domain-containing disease resistance protein	Chr05	10127888	10129580	6.49509	-2.25408	0.691016	-3.18471	0.00144897	0.00597919
itf05g09080	nodulin MtN21 /EamA-like transporter family protein	Chr05	10328631	10332490	811.885	-3.23933	0.662003	-4.93445	8.03782e-07	1.49475e-05
itf05g11070	basic helix-loop-helix (bHLH) DNA-binding superfamily protein	Chr05	13244516	13248113	140.928	4.36403	0.767533	5.52413	3.3113e-08	1.18997e-06
itf05g11530	nodulin MtN21 /EamA-like transporter family protein	Chr05	14009037	14011659	179.36	2.00681	0.697533	3.04267	0.00234493	0.00882642
itf05g11980	DUF1475 domain containing protein	Chr05	14788517	14797994	147.759	4.41785	0.596309	7.27703	3.41242e-13	1.3961e-10
itf05g11990	DUF1475 domain containing protein	Chr05	14800050	14808943	143.073	3.71921	0.688907	5.29511	1.18944e-07	3.30867e-06
itf05g12200	Haloacid dehalogenase-like hydrolase (HAD) superfamily protein	Chr05	15118728	15122120	370.452	-2.31045	0.498062	-4.63814	3.51552e-06	4.74319e-05
itf05g12700	cytochrome P450, family 78, subfamily A, polypeptide	Chr05	15684333	15687597	11.3023	-2.02525	0.544215	-3.66971	0.000242824	0.00142297
itf05g12740	hypothetical protein	Chr05	15756398	15758047	141.467	3.09813	0.607111	5.00579	5.56346e-07	1.1124e-05
itf05g12890	bZIP transcription factor family protein	Chr05	15915412	15918041	297.601	-2.26036	0.647654	-3.44132	0.000578889	0.00286354
itf05g12950	hypothetical protein	Chr05	16008366	16009817	33.1579	-2.44153	0.599925	-4.04588	5.21277e-05	0.000409159
itf05g13480	hydroxyproline-rich glycoprotein family protein	Chr05	16617548	16618088	5.14285	3.27442	0.732521	4.01099	6.0465e-05	0.000462186
itf05g13690	NAD(P)-linked oxidoreductase superfamily protein	Chr05	16813307	16815590	72.0266	-2.03505	0.657043	-3.07272	0.00212117	0.00814351
itf05g14250	phosphoglucomutase	Chr05	17458304	17464193	948.249	3.14618	0.470355	6.66534	2.64048e-11	5.12543e-09
itf05g14380	global transcription factor group E4	Chr05	17621032	17623692	919.083	2.40244	0.290526	8.26326	1.41742e-16	2.5129e-13
itf05g14430	conserved hypothetical protein	Chr05	17671227	17672301	37.9552	-2.43944	0.625132	-3.88864	0.000100806	0.000699562
itf05g15240	LOB domain-containing protein	Chr05	18353590	18355223	802.194	2.22487	0.502602	4.38256	1.17295e-05	0.000122879
itf05g15250	cytochrome P450, family 735, subfamily A, polypeptide	Chr05	18391346	18396475	588.443	-2.20643	0.51918	-4.24934	2.14405e-05	0.000200693
itf05g15330	UDP-Glycosyltransferase superfamily protein	Chr05	18480200	18481777	19.3419	-2.7532	0.493815	-5.4146	6.14243e-08	1.93309e-06
itf05g15500	UDP-Glycosyltransferase superfamily protein	Chr05	18594813	18596501	121.954	-2.63776	0.503863	-5.25367	1.49097e-07	3.93348e-06
itf05g15510	UDP-Glycosyltransferase superfamily protein	Chr05	18613492	18615186	1336.67	-2.95748	0.458776	-6.46438	1.01718e-10	1.43882e-08
itf05g15550	F-box family protein	Chr05	18648718	18649819	6.03243	-2.06425	0.580735	-3.35837	0.00078405	0.00364834
itf05g15940	homeobox protein	Chr05	18894359	18896046	11.9832	-2.35737	0.493163	-4.58623	4.51331e-06	5.762e-05
itf05g15990	NOD26-like intrinsic protein 4;2	Chr05	18915133	18918228	110.607	-3.0509	0.649492	-4.71454	2.42252e-06	3.54356e-05
itf05g16030	expansin A10	Chr05	18942604	18944877	777.361	4.23818	0.608304	6.74303	1.55118e-11	3.3537e-09
itf05g16070	NAC domain containing protein	Chr05	18977597	18979346	19.9376	-2.29012	0.688699	-3.32445	0.000885928	0.00402394
itf05g16300	Cyclic nucleotide-regulated ion channel family protein	Chr05	19183788	19188568	58.6752	2.04622	0.594709	3.42236	0.000620802	0.00302141
itf05g16370	Glycosyl transferase, family	Chr05	19218439	19224781	18284.2	3.3819	0.602055	5.59649	2.18733e-08	8.60959e-07
itf05g16500	methyl esterase	Chr05	19325098	19327908	10.2556	3.99786	0.74902	4.73603	2.17942e-06	3.27998e-05
itf05g16610	brassinosteroid-6-oxidase	Chr05	19392049	19396279	405.382	-2.60345	0.545327	-4.7907	1.662e-06	2.63708e-05
itf05g17330	methyl esterase	Chr05	19844946	19848693	95.4177	-2.55174	0.473564	-5.36995	7.8758e-08	2.35592e-06
itf05g17510	methyl esterase	Chr05	19953875	19956043	1081.99	-2.48166	0.343932	-7.21838	5.26104e-13	2.0275e-10
itf05g17540	SKU5 similar	Chr05	19986276	19990054	387.454	2.18647	0.447113	4.86633	1.13691e-06	1.96068e-05
itf05g17570	Peroxidase superfamily protein	Chr05	20006029	20007526	244.929	-2.81585	0.680223	-4.18437	2.85956e-05	0.000253144
itf05g17700	Acyl transferase/acyl hydrolase/lysophospholipase superfamily protein	Chr05	20096741	20100262	5.30848	-2.65261	0.785227	-3.05673	0.00223765	0.00849717
itf05g17740	conserved hypothetical protein	Chr05	20124110	20127335	69.8798	-2.82449	0.597543	-4.72387	2.31398e-06	3.42436e-05
itf05g17820	ralf-like	Chr05	20183824	20184451	17.7295	2.27607	0.49539	4.53982	5.63034e-06	6.86195e-05
itf05g17860	DNA-directed DNA polymerases	Chr05	20214277	20224480	89.5048	2.6141	0.413144	6.28954	3.18411e-10	3.32059e-08
itf05g17980	end binding protein 1C	Chr05	20311726	20314011	61.8602	2.09462	0.441671	4.70913	2.48774e-06	3.60919e-05
itf05g18120	arabinogalactan protein	Chr05	20379970	20381777	1065.58	3.18105	0.519815	6.05686	1.38801e-09	1.01405e-07
itf05g18230	Phototropic-responsive NPH3 family protein	Chr05	20469414	20472806	233.575	2.27734	0.374825	6.06095	1.35321e-09	9.95447e-08
itf05g18460	Chalcone and stilbene synthase family protein	Chr05	20646166	20648690	26.6411	-4.08811	0.660686	-5.17414	2.2896e-07	5.55542e-06
itf05g18480	Chalcone and stilbene synthase family protein	Chr05	20661540	20663240	17.9031	-3.50065	0.616657	-5.29444	1.19383e-07	3.31555e-06
itf05g18500	Chalcone and stilbene synthase family protein	Chr05	20672996	20674421	11.6445	-3.69001	0.66442	-5.34187	9.19932e-08	2.67363e-06
itf05g18510	Chalcone and stilbene synthase family protein	Chr05	20681295	20682697	9.16809	-2.24338	0.714777	-3.34686	0.000817318	0.00377408
itf05g18580	CBS domain-containing protein with a domain of unknown function (DUF21)	Chr05	20735901	20738400	10.2171	2.45152	0.529646	4.4868	7.23012e-06	8.33423e-05
itf05g18600	myb domain protein	Chr05	20745070	20746301	3.09459	-3.08544	0.617267	-4.27212	1.93626e-05	0.000184754
itf05g18630	Probable methyltransferase PMT27	Chr05	20759346	20764909	30.7694	2.11249	0.563217	3.69212	0.000222395	0.00132012
itf05g18640	conserved hypothetical protein	Chr05	20766783	20768284	11.4271	-3.00787	0.600455	-4.51938	6.20199e-06	7.40591e-05
itf05g18680	basic helix-loop-helix (bHLH) DNA-binding superfamily protein	Chr05	20812442	20814377	26.164	-3.21617	0.560204	-5.63185	1.78291e-08	7.36227e-07
itf05g18710	basic helix-loop-helix (bHLH) DNA-binding superfamily protein	Chr05	20839870	20841970	355.241	-3.43282	0.51788	-6.6834	2.33467e-11	4.66812e-09
itf05g18800	conserved hypothetical protein	Chr05	20891003	20893198	16.0366	2.08707	0.416515	4.95092	7.38639e-07	1.39919e-05
itf05g18930	CAP160 protein	Chr05	20954730	20957680	6.373	-2.477	0.715354	-3.82469	0.000130937	0.000861672
itf05g19490	pectin methylesterase PCR fragment F	Chr05	21284424	21288341	239.494	2.04788	0.330387	6.18992	6.01929e-10	5.48418e-08
itf05g19540	defective in meristem silencing	Chr05	21319047	21326240	15.3719	2.63757	0.593064	4.33802	1.43775e-05	0.000144958
itf05g19550	IQ-domain	Chr05	21329182	21332231	71.7402	3.96982	0.622321	6.25183	4.05669e-10	3.99554e-08
itf05g19670	P-loop containing nucleoside triphosphate hydrolases superfamily protein	Chr05	21390139	21391905	6.48536	2.25874	0.516732	4.20384	2.62426e-05	0.000236801
itf05g19720	homeobox	Chr05	21410007	21411340	100.597	-2.86742	0.611136	-4.8413	1.28993e-06	2.15336e-05
itf05g19970	Subtilase family protein	Chr05	21524682	21527921	520.695	2.78807	0.496652	5.59614	2.19181e-08	8.60959e-07
itf05g20350	EF hand calcium-binding protein family	Chr05	21763448	21764583	58.7168	-2.00528	0.397291	-5.04298	4.58345e-07	9.50763e-06
itf05g20810	RmlC-like cupins superfamily protein	Chr05	21986540	21987391	25.4035	-2.86228	0.588566	-4.74336	2.10207e-06	3.18339e-05
itf05g20820	RmlC-like cupins superfamily protein	Chr05	21993167	21994118	120.419	-4.25086	0.594301	-7.06514	1.60454e-12	4.79432e-10
itf05g20950	AAA-ATPase	Chr05	22079544	22081355	177.853	-2.8933	0.622723	-4.65071	3.30787e-06	4.53901e-05
itf05g21120	conserved hypothetical protein	Chr05	22189134	22190874	46.2742	-3.71574	0.546878	-6.5665	5.15132e-11	8.56181e-09
itf05g21430	Alginate lyase domain containing protein	Chr05	22395450	22396869	44.6727	2.66441	0.677836	3.72492	0.000195373	0.00118512
itf05g21540	Leucine-rich receptor-like protein kinase family protein	Chr05	22455018	22459270	93.0631	3.16435	0.618509	5.14043	2.74114e-07	6.3887e-06
itf05g21580	Ras-related small GTP-binding family protein	Chr05	22474186	22478125	46.2599	2.35858	0.492316	4.74559	2.07895e-06	3.15221e-05
itf05g21680	alanine:glyoxylate aminotransferase	Chr05	22533137	22537158	132.24	2.27101	0.439765	5.14352	2.69633e-07	6.30639e-06
itf05g21790	cellulose synthase like E1	Chr05	22625759	22628136	21.8342	-3.27437	0.65207	-4.90204	9.48451e-07	1.70882e-05
itf05g21800	cellulose synthase like E1	Chr05	22628178	22628693	1.86726	-3.03427	0.785042	-3.65743	0.000254756	0.00147813
itf05g21810	cellulose synthase like E1	Chr05	22633768	22637976	17.2007	-2.91202	0.590785	-4.79378	1.63671e-06	2.60473e-05
itf05g21820	cellulose synthase like E1	Chr05	22638354	22641273	14.9435	-3.17231	0.67877	-4.11545	3.86427e-05	0.00032224
itf05g21880	NAD(P)-binding Rossmann-fold superfamily protein	Chr05	22677394	22678763	89.2199	2.14471	0.436559	4.90255	9.45985e-07	1.70669e-05
itf05g22150	basic helix-loop-helix (bHLH) DNA-binding superfamily protein	Chr05	22874808	22876425	24.7414	2.62895	0.551294	4.6877	2.76288e-06	3.9417e-05
itf05g22180	AIG2-like (avirulence induced gene) family protein	Chr05	22904235	22904994	41.2716	2.33273	0.381419	6.08334	1.17703e-09	9.09903e-08
itf05g22190	conserved hypothetical protein	Chr05	22910541	22917703	347.194	3.04096	0.482359	6.26867	3.64148e-10	3.68205e-08
itf05g22480	NRAMP metal ion transporter	Chr05	23038033	23041220	3.85511	3.57474	0.721047	3.92518	8.66646e-05	0.000621708
itf05g22630	elicitor-activated gene 3-2	Chr05	23100249	23102794	9.85185	3.19017	0.662908	4.4655	7.98837e-06	9.02958e-05
itf05g22710	GAST1 protein homolog	Chr05	23165198	23166274	791.37	3.83204	0.514665	7.37657	1.62414e-13	7.99828e-11
itf05g22730	TIFY domain/Divergent CCT motif family protein	Chr05	23170755	23173175	30.7918	2.73911	0.745952	3.75164	0.000175681	0.00108876
itf05g22900	TPX2 (targeting protein for Xklp2) protein family	Chr05	23299710	23301858	42.5213	2.71817	0.707497	3.89056	0.000100013	0.000694969
itf05g23020	conserved hypothetical protein	Chr05	23382787	23386837	244.487	2.48014	0.440259	5.60476	2.08547e-08	8.32717e-07
itf05g23030	conserved hypothetical protein	Chr05	23387611	23388237	60.306	2.8003	0.458193	6.05807	1.37767e-09	1.00927e-07
itf05g23210	hydroxy methylglutaryl CoA reductase	Chr05	23499920	23503613	787.325	-2.76497	0.512395	-5.39414	6.88535e-08	2.13157e-06
itf05g23290	Myosin heavy chain-related protein	Chr05	23567260	23570067	10.0098	-2.43509	0.621953	-3.82286	0.000131915	0.000866789
itf05g23870	ferredoxin-NADP(+)-oxidoreductase	Chr05	23877001	23879904	643.714	2.03973	0.473292	4.30986	1.63354e-05	0.000160476
itf05g23930	SAUR-like auxin-responsive protein family	Chr05	23908999	23910063	13.5184	2.99921	0.638429	4.54682	5.44625e-06	6.67737e-05
itf05g24030	ferulic acid 5-hydroxylase	Chr05	23961421	23965312	21.973	-3.51807	0.709462	-4.86615	1.13794e-06	1.96119e-05
itf05g24160	cytochrome P450, family 722, subfamily A, polypeptide	Chr05	24090259	24092788	207.256	-2.2861	0.805655	-3.74321	0.000181686	0.00111816
itf05g24200	conserved hypothetical protein	Chr05	24124798	24125447	973.069	-2.11109	0.478002	-4.41407	1.01446e-05	0.000109265
itf05g24380	CLAVATA3/ESR-RELATED	Chr05	24210820	24211243	5.15358	2.94069	0.591396	4.56961	4.88643e-06	6.12947e-05
itf05g25110	beta-ketoacyl reductase	Chr05	24546834	24550073	34.138	-2.48615	0.60594	-4.10798	3.99132e-05	0.000330761
itf05g25290	NAC (No Apical Meristem) domain transcriptional regulator superfamily protein	Chr05	24643781	24645332	459.64	-3.17606	0.444175	-7.16258	7.91737e-13	2.80729e-10
itf05g25450	cyclic nucleotide-gated cation channel	Chr05	24705789	24710967	101.46	-2.24629	0.520679	-4.25671	2.07454e-05	0.000195494
itf05g26120	WRKY DNA-binding protein	Chr05	24993059	24996217	85.5013	-3.4035	0.658953	-5.15398	2.55019e-07	6.02388e-06
itf05g26250	microtubule-associated proteins 65-1	Chr05	25056467	25059817	34.252	5.11159	0.719805	6.40413	1.51231e-10	1.89702e-08
itf05g26330	Bifunctional inhibitor/lipid-transfer protein/seed storage 2S albumin superfamily protein	Chr05	25093269	25093835	420.748	3.63122	0.628546	5.55639	2.7541e-08	1.02577e-06
itf05g27110	conserved hypothetical protein	Chr05	25456139	25458140	48.0158	2.05636	0.440102	4.64674	3.37225e-06	4.60299e-05
itf06g00330	ABC-2 type transporter family protein	Chr06	405519	407682	226.132	3.24471	0.587198	5.46139	4.72423e-08	1.58626e-06
itf06g00610	cytochrome P450, family 71, subfamily B, polypeptide	Chr06	833230	835210	4.01414	-2.44086	0.677324	-3.34617	0.000819361	0.00378243
itf06g01310	late embryogenesis abundant protein-related / LEA protein-related	Chr06	1954084	1955909	7.95928	-2.77106	0.798753	-3.18892	0.00142807	0.00591446
itf06g03610	AGAMOUS-like	Chr06	5389466	5390108	3.27352	2.74157	0.804787	3.2385	0.0012016	0.00514834
itf06g05140	syntaxin of plants	Chr06	7098408	7101412	10.783	3.18516	0.701585	4.26114	2.03383e-05	0.000191997	NONC	4
itf06g05380	K-box region and MADS-box transcription factor family protein	Chr06	7492214	7495813	18.4734	-2.23262	0.662873	-3.29291	0.000991547	0.00441161	NONC	4
itf06g05430	Integrase-type DNA-binding superfamily protein	Chr06	7560902	7562326	272.236	-2.20769	0.44041	-5.01081	5.42e-07	1.08945e-05	NONC	4
itf06g05730	S-domain-2	Chr06	8011435	8014453	18.2471	2.05653	0.366116	5.55257	2.81505e-08	1.04408e-06	NONC	4
itf06g06380	UDP-Glycosyltransferase superfamily protein	Chr06	8769251	8771947	74.9513	-2.24818	0.544785	-4.1275	3.66725e-05	0.000309794	NONC	4
itf06g06390	UDP-Glycosyltransferase superfamily protein	Chr06	8789601	8792645	108.666	-2.49343	0.517896	-4.84139	1.28933e-06	2.15336e-05	NONC	4
itf06g06400	UDP-Glycosyltransferase superfamily protein	Chr06	8817677	8820616	30.9763	-2.99315	0.596494	-4.97229	6.61675e-07	1.28531e-05	NONC	4
itf06g06410	UDP-glucosyl transferase 73C1	Chr06	8848712	8850380	78.0352	-3.38574	0.654965	-5.24422	1.56944e-07	4.11174e-06	NONC	4
itf06g06570	Protein of unknown function (DUF1624)	Chr06	8989385	8997936	195.358	-4.19433	0.780106	-6.36858	1.90784e-10	2.20588e-08	NONC	4
itf06g07230	plasma membrane intrinsic protein 2;4	Chr06	9641231	9642752	1387.52	-2.94365	0.631225	-4.61947	3.8473e-06	5.09265e-05	NONC_TNR	4_5
itf06g07250	plasma membrane intrinsic protein 2;4	Chr06	9653984	9655268	1393.32	-2.74319	0.61485	-4.4291	9.46252e-06	0.000103469	NONC_TNR	4_5
itf06g07270	plasma membrane intrinsic protein 2;4	Chr06	9670579	9672011	806.734	-2.46348	0.61344	-3.99842	6.37672e-05	0.000482092	NONC_TNR	4_5
itf06g07390	BES1/BZR1 homolog	Chr06	9785156	9788725	35.4566	2.66173	0.454069	5.80291	6.51755e-09	3.4321e-07	NONC_TNR	4_5
itf06g07450	Protein of unknown function (DUF640)	Chr06	9848168	9848944	298.103	2.57133	0.504352	5.09383	3.50897e-07	7.71827e-06	NONC_TNR	4_5
itf06g07930	conserved hypothetical protein	Chr06	10294667	10297306	1.76144	-2.92352	0.803762	-3.16012	0.00157703	0.00639493	NONC_TNR	4_5
itf06g08060	Galactose oxidase/kelch repeat superfamily protein	Chr06	10442923	10445258	230.129	3.42725	0.576427	5.81367	6.11166e-09	3.2636e-07	NONC_TNR	4_5
itf06g08140	Undecaprenyl pyrophosphate synthetase family protein	Chr06	10545750	10549468	49.6562	-3.16914	0.479362	-6.48668	8.7749e-11	1.27514e-08	NONC_TNR	4_5
itf06g08220	basic helix-loop-helix (bHLH) DNA-binding superfamily protein	Chr06	10602417	10604982	5.22554	2.48388	0.721907	3.24191	0.00118732	0.00509758	NONC_TNR	4_5
itf06g08860	Pollen Ole e 1 allergen and extensin family protein	Chr06	11119976	11121221	95.6455	4.13667	0.595972	6.78838	1.13402e-11	2.64534e-09	NONC_TNR	4_5
itf06g09750	myb-like transcription factor family protein	Chr06	11957032	11960200	51.0848	-2.11907	0.551331	-3.83279	0.000126696	0.000839578
itf06g11190	conserved hypothetical protein	Chr06	14097671	14101032	7.73597	2.48174	0.672145	3.50475	0.000457036	0.00235957
itf06g11520	Kunitz family trypsin and protease inhibitor protein	Chr06	14476885	14478189	623.416	4.25702	0.777238	4.74098	2.12692e-06	3.21006e-05
itf06g11900	Histone superfamily protein	Chr06	14879753	14888640	13.3645	2.1832	0.531278	4.02879	5.60652e-05	0.000434804
itf06g11910	cytochrome P450, family 76, subfamily C, polypeptide	Chr06	14888672	14889152	1.17056	-3.07191	0.794443	-3.44207	0.00057728	0.00285717
itf06g11940	cytochrome P450, family 76, subfamily C, polypeptide	Chr06	14902794	14906382	4.9499	-2.55609	0.66284	-3.62195	0.00029239	0.0016512
itf06g12060	terpene synthase	Chr06	15012168	15015969	2.99394	-2.20989	0.75061	-3.22843	0.00124472	0.00528938
itf06g12370	Bifunctional inhibitor/lipid-transfer protein/seed storage 2S albumin superfamily protein	Chr06	15352345	15353274	72.0911	4.10978	0.733131	5.26156	1.42842e-07	3.79101e-06
itf06g12380	terpene synthase	Chr06	15360083	15365935	46.3721	-3.83563	0.699292	-5.37895	7.49227e-08	2.26927e-06
itf06g12740	Integrase-type DNA-binding superfamily protein	Chr06	15819280	15820263	77.764	4.98452	0.619824	7.75728	8.67688e-15	9.01549e-12
itf06g13360	Probable methyltransferase PMT19	Chr06	16524196	16525534	2.06532	-2.47834	0.802135	-3.13361	0.00172672	0.00689057
itf06g13530	Chlorophyll A-B binding family protein	Chr06	16689946	16693140	12.8301	2.48428	0.799198	3.58766	0.000333657	0.0018357
itf06g13600	UDP-glucosyltransferase 74F2	Chr06	16739480	16741734	413.147	-2.75351	0.603022	-4.5945	4.33785e-06	5.58087e-05
itf06g14280	cyclin-dependent kinase B2;2	Chr06	17452288	17453588	4.11456	2.07361	0.558611	3.50833	0.000450925	0.00233706
itf06g14370	Nodulin MtN3 family protein	Chr06	17600145	17603483	6.03394	3.38491	0.806142	3.31144	0.00092816	0.00418349
itf06g14420	homolog of yeast CDT1 A	Chr06	17654028	17656737	24.3401	2.95345	0.527507	5.49363	3.9375e-08	1.35987e-06
itf06g14680	amino acid permease	Chr06	17860914	17865205	1262.72	-2.14475	0.38587	-5.56275	2.65557e-08	1.00237e-06
itf06g14830	conserved hypothetical protein	Chr06	18037432	18039835	9.29321	2.31523	0.550889	4.07795	4.54341e-05	0.000366019
itf06g14940	organic cation/carnitine transporter	Chr06	18114791	18116602	25.1201	2.10949	0.541946	3.79441	0.000147996	0.000949496
itf06g15510	Chaperone DnaJ-domain superfamily protein	Chr06	18662709	18663408	85.3107	3.5905	0.422881	8.41341	3.98252e-17	7.5648e-14
itf06g15800	FASCICLIN-like arabinogalactan	Chr06	18942724	18944413	206.413	2.66653	0.459141	5.78155	7.40168e-09	3.79986e-07
itf06g16590	conserved hypothetical protein	Chr06	19502293	19502800	46.0929	2.12786	0.422872	5.01033	5.43358e-07	1.09135e-05
itf06g16960	S-locus lectin protein kinase family protein	Chr06	19795622	19799733	1348.78	-2.01008	0.425265	-4.72645	2.28481e-06	3.39441e-05
itf06g17080	receptor kinase	Chr06	19878236	19881266	9.51832	-2.10001	0.547568	-3.73395	0.000188499	0.00115209
itf06g17270	Wound-responsive family protein	Chr06	19998152	20000973	1280.05	2.23791	0.403658	5.52319	3.32896e-08	1.1947e-06
itf06g17280	Wound-responsive family protein	Chr06	20003439	20004201	219.883	2.94054	0.539234	5.40081	6.63395e-08	2.06335e-06
itf06g17290	hypothetical protein	Chr06	20006747	20008638	241.808	3.18838	0.514404	6.15066	7.71629e-10	6.72785e-08
itf06g17580	GATA transcription factor	Chr06	20230506	20232209	11.5655	2.39699	0.558237	4.18754	2.81998e-05	0.000250474
itf06g17730	IQ-domain	Chr06	20370611	20371890	17.6715	3.02359	0.457655	6.43163	1.2624e-10	1.67855e-08
itf06g17740	IQ-domain	Chr06	20372500	20373081	5.29198	3.79427	0.64282	4.51811	6.23951e-06	7.42837e-05
itf06g17760	phosphofructokinase	Chr06	20387704	20391638	197.74	2.1667	0.358711	6.0362	1.57785e-09	1.13371e-07
itf06g17940	cytochrome P450, family 90, subfamily D, polypeptide	Chr06	20551764	20556640	38.4203	-2.80252	0.53555	-5.1856	2.15319e-07	5.30184e-06
itf06g18030	Glycosyl hydrolases family 32 protein	Chr06	20642398	20645135	100.997	-3.47943	0.784757	-5.13549	2.81405e-07	6.51193e-06
itf06g18150	GRAS family transcription factor	Chr06	20711957	20713649	205.863	-2.14814	0.535779	-4.03499	5.46051e-05	0.000425465
itf06g18170	alpha/beta-Hydrolases superfamily protein	Chr06	20717756	20719703	10.6022	2.45863	0.54145	4.40156	1.07476e-05	0.000114691
itf06g18280	Aldolase-type TIM barrel family protein	Chr06	20782092	20784336	3.23736	3.01586	0.763498	3.40776	0.000654981	0.00314988
itf06g18420	pectin methylesterase	Chr06	20867128	20870901	398.852	2.35869	0.439072	5.36117	8.26858e-08	2.45135e-06
itf06g18460	RING/U-box superfamily protein	Chr06	20892391	20892997	3.8016	2.77373	0.792828	3.05583	0.00224442	0.00851551
itf06g18500	regulatory particle triple-A 1A	Chr06	20904636	20907533	143.565	2.00561	0.312165	6.41668	1.39277e-10	1.79414e-08
itf06g18570	ATP synthase epsilon chain, mitochondrial	Chr06	20955870	20958266	5.09462	2.3122	0.550517	4.0096	6.0822e-05	0.000464456
itf06g18910	phosphatidylinositol-4-phosphate 5-kinase family protein	Chr06	21161001	21163721	188.479	-3.89155	0.61507	-6.39816	1.57262e-10	1.93614e-08
itf06g19680	vacuolar membrane ATPase	Chr06	21724975	21727435	67.7871	2.18646	0.443588	4.89409	9.87614e-07	1.75912e-05
itf06g20470	cytochrome P450, family 76, subfamily C, polypeptide	Chr06	22257673	22260465	416.665	-2.2499	0.429962	-5.24741	1.54255e-07	4.05346e-06
itf06g20490	cytochrome P450, family 76, subfamily C, polypeptide	Chr06	22265817	22268593	91.8613	-2.04182	0.51645	-3.99683	6.41955e-05	0.000484298
itf06g20770	alternative oxidase 1A	Chr06	22448590	22450622	313.107	-2.45814	0.616916	-4.01715	5.89055e-05	0.000452477
itf06g20840	GDSL-like Lipase/Acylhydrolase superfamily protein	Chr06	22482456	22484286	7.3944	-2.27206	0.554105	-3.86357	0.00011174	0.000759392
itf06g21010	Pectinacetylesterase family protein	Chr06	22601125	22605634	233.627	-2.02527	0.298858	-6.77548	1.23998e-11	2.81835e-09
itf06g21470	C2H2-like zinc finger protein	Chr06	22894161	22897236	70.9148	-2.00961	0.397051	-5.05396	4.32752e-07	9.119e-06
itf06g21540	glycosyl hydrolase 9B5	Chr06	22927887	22931998	13.0456	2.17531	0.650192	3.25669	0.0011272	0.00488282
itf06g21810	beta-galactosidase	Chr06	23128679	23134617	331.551	2.46951	0.451011	5.45297	4.95358e-08	1.64252e-06
itf06g22280	conserved hypothetical protein	Chr06	23414331	23418491	26.0692	2.04922	0.492107	4.11414	3.88633e-05	0.000323573
itf06g22640	Protein of unknown function, DUF547	Chr06	23637276	23641095	10.0001	2.20743	0.629039	3.4159	0.000635724	0.00307812
itf06g22740	origin recognition complex second largest subunit	Chr06	23685178	23687192	28.4871	2.0504	0.424713	4.79484	1.62803e-06	2.59557e-05
itf06g22800	calmodulin like	Chr06	23710030	23710545	203.495	-2.29568	0.366615	-6.26917	3.62969e-10	3.68205e-08
itf06g22880	abscisic acid responsive element-binding factor	Chr06	23759080	23762914	2399.26	-3.51052	0.396488	-8.88446	6.42324e-19	1.89792e-15
itf06g22940	heat shock transcription factor B4	Chr06	23804076	23805570	40.727	3.33755	0.56193	5.87468	4.23661e-09	2.47368e-07
itf06g23410	no pollen germination related	Chr06	24076036	24079413	145.731	2.11174	0.30748	6.86253	6.76532e-12	1.66163e-09
itf06g23780	KNOTTED-like from Arabidopsis thaliana	Chr06	24268995	24273123	253.216	2.04611	0.47764	4.27078	1.94794e-05	0.000185669
itf06g23830	amino acid permease	Chr06	24299434	24302625	142.707	2.76467	0.50919	5.43466	5.49016e-08	1.774e-06
itf06g23900	MATE efflux family protein	Chr06	24362054	24363969	15.7028	2.12585	0.71198	2.99705	0.00272602	0.00996744
itf06g23950	beta HLH protein	Chr06	24397730	24399691	18.0749	2.85741	0.570163	4.86134	1.16591e-06	1.99389e-05
itf06g24000	oligopeptide transporter	Chr06	24432716	24437916	25.564	2.48215	0.614411	3.95787	7.56201e-05	0.000553375
itf06g24140	Protein kinase superfamily protein	Chr06	24521763	24528343	51.0083	3.07004	0.589343	5.17283	2.30569e-07	5.58935e-06
itf06g24200	Predicted AT-hook DNA-binding family protein	Chr06	24554325	24555703	151.602	-3.53331	0.536117	-6.61545	3.70416e-11	6.75493e-09
itf06g24220	Eukaryotic aspartyl protease family protein	Chr06	24573226	24575017	451.79	3.44789	0.607961	5.50509	3.68982e-08	1.29793e-06
itf06g24510	general regulatory factor	Chr06	24714157	24716335	17.6268	2.82625	0.578187	4.78074	1.74649e-06	2.74819e-05
itf06g24590	UDP-glucosyl transferase 85A2	Chr06	24755848	24758407	4.68785	2.76407	0.801824	3.6097	0.00030655	0.00171623
itf06g24710	AtL5	Chr06	24813016	24813812	489.589	-4.14001	0.643598	-6.5159	7.22532e-11	1.13025e-08
itf06g24720	hypothetical protein	Chr06	24816439	24816940	176.302	-3.73226	0.588184	-6.37695	1.80648e-10	2.15425e-08
itf06g24780	RING/U-box superfamily protein	Chr06	24830106	24830877	1.64563	-2.88738	0.782786	-3.50818	0.000451178	0.00233725
itf06g24910	poly(A) binding protein	Chr06	24901698	24904689	12.3877	3.79534	0.687008	5.15361	2.55524e-07	6.02943e-06
itf06g24920	RAB GTPase homolog G3A	Chr06	24906177	24908717	49.0255	2.99428	0.50463	5.87448	4.24171e-09	2.47368e-07
itf06g25120	Haloacid dehalogenase-like hydrolase (HAD) superfamily protein	Chr06	25003536	25006121	25.2104	2.62876	0.551018	4.66595	3.07189e-06	4.27476e-05
itf06g25170	Protein of unknown function (DUF581)	Chr06	25031457	25033244	35.372	2.0319	0.476092	4.23359	2.29994e-05	0.000212647
itf06g25210	Heavy metal transport/detoxification superfamily protein	Chr06	25060044	25062109	805.326	-2.80338	0.482289	-5.8469	5.00826e-09	2.80389e-07
itf06g25700	reversibly glycosylated polypeptide	Chr06	25344829	25347330	585.625	2.42189	0.525625	4.58099	4.62778e-06	5.88272e-05
itf06g26260	mini zinc finger	Chr06	25627125	25627856	40.6092	-3.39895	0.619718	-5.42253	5.87627e-08	1.86033e-06
itf06g26280	glutathione S-transferase tau	Chr06	25632828	25633845	67.9493	-2.51796	0.55666	-4.48816	7.18414e-06	8.29328e-05
itf07g00140	starch branching enzyme 2.1	Chr07	83247	89519	2782.06	2.06133	0.409832	5.02379	5.06605e-07	1.03314e-05
itf07g00190	Protein kinase superfamily protein	Chr07	133820	136235	11.7417	2.71246	0.642312	4.04731	5.18103e-05	0.000407269
itf07g00390	bZIP transcription factor family protein	Chr07	232395	238740	566.266	-3.07203	0.518725	-5.93474	2.94308e-09	1.83042e-07
itf07g00910	Glycosyl hydrolase family protein	Chr07	490257	494219	231.789	4.77686	0.5199	9.04255	1.53064e-19	6.78405e-16	NOCR	5
itf07g00950	Glycosyl hydrolase family protein	Chr07	506431	510882	721.643	2.00032	0.341021	5.8596	4.63975e-09	2.64774e-07	NOCR	5
itf07g01220	terpene synthase-like sequence-1,8-cineole	Chr07	656695	658757	160.826	2.61848	0.737881	3.79475	0.00014779	0.000948404	NOCR	5
itf07g01230	terpene synthase-like sequence-1,8-cineole	Chr07	665225	669368	12.2595	2.82302	0.714961	3.58732	0.000334101	0.00183721	NOCR	5
itf07g01250	cystatin B	Chr07	696534	697574	521.151	2.27196	0.661862	3.49645	0.000471484	0.0024191	NOCR	5
itf07g01260	cystatin B	Chr07	700111	701178	4811.57	2.49686	0.51892	4.86468	1.14641e-06	1.97152e-05	NOCR	5
itf07g02160	HXXXD-type acyl-transferase family protein	Chr07	1269898	1271221	15.6099	2.23366	0.721709	3.08674	0.00202367	0.00783225	NOCR	5
itf07g02190	HXXXD-type acyl-transferase family protein	Chr07	1291005	1294147	13.2716	2.33068	0.67936	3.31628	0.000912252	0.00412507	NOCR	5
itf07g02590	Disease resistance-responsive (dirigent-like protein) family protein	Chr07	1714784	1715533	358.97	3.02143	0.459354	6.53396	6.40537e-11	1.02613e-08	NOCR	5
itf07g02710	fatty acid desaturase	Chr07	1760856	1764189	182.353	2.75175	0.518017	5.28288	1.27167e-07	3.491e-06	NOCR	5
itf07g02720	Plant U-Box	Chr07	1764501	1768296	16.5345	-2.65936	0.58701	-4.4011	1.07704e-05	0.000114889	NOCR	5
itf07g02820	2-oxoglutarate (2OG) and Fe(II)-dependent oxygenase superfamily protein	Chr07	1822457	1823632	107.656	-2.51598	0.808039	-4.50044	6.78119e-06	7.94185e-05	NOCR	5
itf07g03250	monooxygenase	Chr07	2123141	2126159	407.387	-2.50884	0.454907	-5.53474	3.11687e-08	1.13079e-06	NOCR	5
itf07g03410	cellulase	Chr07	2201457	2205175	86.4791	2.66869	0.43631	6.07741	1.22141e-09	9.36049e-08	NOCR	5
itf07g03480	Integrase-type DNA-binding superfamily protein	Chr07	2269505	2270036	8.1325	2.04558	0.609787	3.19676	0.0013898	0.00578661	NOCR	5
itf07g03900	DEAD/DEAH box RNA helicase family protein	Chr07	2546076	2553263	70.5106	2.42082	0.403748	5.97805	2.25827e-09	1.49582e-07	NOCR	5
itf07g04110	photosystem II BY	Chr07	2675647	2676616	113.674	2.17684	0.579094	3.7883	0.000151681	0.000967306	NOCR_FYTHA	5_2
itf07g04130	Pectate lyase family protein	Chr07	2697874	2699471	61.1937	3.38465	0.66984	4.93152	8.15937e-07	1.51147e-05	NOCR_FYTHA	5_2
itf07g04200	Sieve element occlusion C-terminus domain containing protein	Chr07	2754636	2758033	160.821	2.8825	0.663283	4.28966	1.78943e-05	0.000172867	NOCR_FYTHA	5_2
itf07g04210	Sieve element occlusion C-terminus domain containing protein	Chr07	2760408	2763935	122.101	2.25251	0.635834	3.49783	0.000469064	0.00240924	NOCR_FYTHA	5_2
itf07g04390	RING/U-box superfamily protein	Chr07	2847722	2848550	597.348	-2.74681	0.367288	-7.48909	6.93542e-14	4.28915e-11	NOCR_FYTHA	5_2
itf07g04400	conserved hypothetical protein	Chr07	2850876	2851469	13.7696	-3.75515	0.588537	-5.6402	1.69852e-08	7.07974e-07	NOCR_FYTHA	5_2
itf07g04700	Plant protein of unknown function (DUF828)	Chr07	3067448	3070325	1.83521	2.45207	0.731095	3.17051	0.00152172	0.00622763	NOCR_FYTHA	5_2
itf07g04860	DC1 domain-containing protein	Chr07	3147056	3149415	91.7905	-3.21861	0.437957	-7.31679	2.53972e-13	1.12565e-10	NOCR_FYTHA	5_2
itf07g05230	translocon at the inner envelope membrane of chloroplasts 55-II	Chr07	3390786	3394078	162.741	3.46352	0.551024	6.30377	2.9049e-10	3.09e-08	NOCR_FYTHA	5_2
itf07g05400	Protein of unknown function, DUF599	Chr07	3569839	3574635	269.328	-3.01293	0.738531	-4.23353	2.30055e-05	0.000212647	NOCR_FYTHA	5_2
itf07g05630	Acyl-CoA N-acyltransferases (NAT) superfamily protein	Chr07	3701296	3702313	796.625	-2.18625	0.346907	-6.30051	2.96658e-10	3.14304e-08	NOCR_FYTHA	5_2
itf07g05670	Pyridoxal phosphate (PLP)-dependent transferases superfamily protein	Chr07	3757475	3759368	6.27048	-2.24277	0.622356	-3.28577	0.00101706	0.00450102	NOCR_FYTHA	5_2
itf07g05840	conserved hypothetical protein	Chr07	3875464	3877181	101.179	2.20844	0.511982	4.29041	1.78344e-05	0.000172399	NOCR_FYTHA	5_2
itf07g06390	disease resistance family protein / LRR family protein	Chr07	4305219	4309306	8.74718	-2.82436	0.706781	-3.98403	6.77571e-05	0.000506284	NOCR_FYTHA	5_2
itf07g06540	Caleosin-related family protein	Chr07	4457767	4462726	7.11113	-2.13278	0.549017	-3.73231	0.000189735	0.00115807	NOCR_FYTHA	5_2
itf07g06580	receptor-like kinase	Chr07	4477142	4479417	13.1889	-2.46481	0.451335	-5.29435	1.19441e-07	3.31555e-06	NOCR_FYTHA	5_2
itf07g06620	Plant invertase/pectin methylesterase inhibitor superfamily protein	Chr07	4515560	4516582	228.612	-2.118	0.484171	-4.37992	1.18721e-05	0.000123924	NOCR_FYTHA	5_2
itf07g06800	MLP-like protein	Chr07	4738078	4739242	870.918	2.16176	0.607341	3.60497	0.000312194	0.0017405	NOCR_FYTHA	5_2
itf07g06810	MLP-like protein	Chr07	4749193	4750146	322.664	2.19448	0.477811	4.63564	3.5583e-06	4.78151e-05	NOCR_FYTHA	5_2
itf07g07140	Heavy metal transport/detoxification superfamily protein	Chr07	4980660	4984192	256.304	-2.16409	0.373861	-5.78661	7.18221e-09	3.70867e-07	NOCR_FYTHA	5_2
itf07g07350	Bifunctional inhibitor/lipid-transfer protein/seed storage 2S albumin superfamily protein	Chr07	5146896	5147551	34.4967	-2.49186	0.539865	-4.57188	4.83373e-06	6.07483e-05	NOCR_FYTHA	5_2
itf07g07580	Core-2/I-branching beta-1,6-N-acetylglucosaminyltransferase family protein	Chr07	5332078	5336007	8.18249	-3.09611	0.649679	-4.44248	8.89297e-06	9.862e-05	NOCR_FYTHA	5_2
itf07g07860	NB-ARC domain-containing disease resistance protein	Chr07	5686083	5693337	5.17075	-4.24076	0.72191	-5.01204	5.38572e-07	1.08338e-05	NOCR_FYTHA	5_2
itf07g08290	hypothetical protein	Chr07	6091298	6091538	3.98558	-2.58456	0.675749	-3.42311	0.000619092	0.00301419	NOCR_FYTHA	5_2
itf07g08320	Zinc-binding dehydrogenase family protein	Chr07	6099129	6101320	36.424	-2.34255	0.699477	-3.51274	0.000443516	0.00230483	NOCR_FYTHA	5_2
itf07g08450	glutamine dumper	Chr07	6207118	6207931	19.1444	2.08298	0.572213	3.61709	0.000297935	0.00167399	NOCR_FYTHA	5_2
itf07g09170	cytochrome P450, family 82, subfamily C, polypeptide	Chr07	7189959	7191167	19.2691	2.1414	0.442167	4.77583	1.78969e-06	2.79631e-05	NOCR_FYTHA	5_2
itf07g09220	cytochrome P450, family 82, subfamily C, polypeptide	Chr07	7206015	7207687	11.6984	-3.82515	0.67064	-5.1077	3.2611e-07	7.26319e-06	NOCR_FYTHA	5_2
itf07g09230	cytochrome P450, family 82, subfamily C, polypeptide	Chr07	7212232	7212610	4.44933	-3.04171	0.722251	-3.60016	0.000318025	0.0017646	NOCR_FYTHA	5_2
itf07g11790	cyclic nucleotide-gated channel	Chr07	10413928	10418158	35.014	2.3398	0.485338	4.74862	2.04812e-06	3.11233e-05	NOCR_FYTHA	5_2
itf07g11920	nitrate transporter 2.4	Chr07	10634524	10636466	10.0347	-2.78262	0.755013	-3.56585	0.000362672	0.00196387	NOCR	5
itf07g11930	nitrate transporter 2.4	Chr07	10640996	10643326	10.3457	-2.68684	0.768497	-3.44249	0.000576386	0.00285434	NOCR	5
itf07g11940	nitrate transporter 2.4	Chr07	10649653	10651430	13.0874	-2.79321	0.766694	-3.63706	0.000275767	0.00157438	NOCR	5
itf07g12430	hypothetical protein	Chr07	11114662	11115659	49.7982	2.67666	0.483222	5.49941	3.81058e-08	1.32637e-06	NOCR	5
itf07g13880	S-adenosyl-L-methionine-dependent methyltransferases superfamily protein	Chr07	13016226	13021440	20.2705	-2.57889	0.519589	-4.89253	9.95474e-07	1.77075e-05	NOCR	5
itf07g14240	hypothetical protein	Chr07	13650975	13652241	5.341	-2.38425	0.647216	-3.45008	0.000560418	0.00278721	NOCR	5
itf07g14570	NAD(P)-linked oxidoreductase superfamily protein	Chr07	14147689	14151479	109.699	2.03615	0.575679	3.52696	0.000420359	0.00220834	NOCR	5
itf07g15050	Plant protein of unknown function (DUF828)	Chr07	14897233	14901428	119.762	2.41858	0.416644	5.79149	6.97652e-09	3.63066e-07	NOCR	5
itf07g15270	cell division control	Chr07	15046798	15051185	44.4758	3.11038	0.492935	6.2231	4.8742e-10	4.56407e-08	NOCR	5
itf07g15690	cytochrome P450, family 72, subfamily A, polypeptide	Chr07	15820285	15823610	409.382	-2.54032	0.585301	-4.3529	1.34346e-05	0.00013741
itf07g15750	DNA primase, large subunit family	Chr07	15849663	15856835	68.1462	2.50831	0.387704	6.43434	1.24011e-10	1.65846e-08
itf07g16060	ribonuclease	Chr07	16164486	16165594	244.14	3.83446	0.726167	5.12939	2.90676e-07	6.64656e-06
itf07g16280	Protein of unknown function, DUF538	Chr07	16434711	16435212	2.99163	3.56115	0.792479	3.53374	0.000409729	0.00216318
itf07g16290	Actin binding Calponin homology (CH) domain-containing protein	Chr07	16437164	16447932	32.7332	2.31269	0.470939	4.85744	1.18914e-06	2.02062e-05
itf07g16440	basic helix-loop-helix (bHLH) DNA-binding superfamily protein	Chr07	16654633	16657321	630.109	2.463	0.365355	6.73214	1.67188e-11	3.58551e-09
itf07g16580	conserved hypothetical protein	Chr07	16789527	16791183	46.3214	2.74548	0.476626	5.71475	1.09867e-08	5.13477e-07
itf07g16610	Vacuolar iron transporter (VIT) family protein	Chr07	16810779	16816122	261.428	-4.1305	0.728683	-5.95725	2.56514e-09	1.63978e-07
itf07g16830	NB-ARC domain-containing disease resistance protein	Chr07	16994490	16997674	2.62182	-2.32627	0.641527	-3.29986	0.000967318	0.00432916
itf07g16860	Alba DNA/RNA-binding protein	Chr07	17022798	17026085	48.9284	2.18053	0.379753	5.70568	1.15878e-08	5.3777e-07
itf07g18170	hypothetical protein	Chr07	18198152	18200881	13.259	-2.49107	0.598221	-3.54294	0.000395687	0.00210576
itf07g18180	EID1-like	Chr07	18201003	18201870	107.952	-2.187	0.615391	-3.74596	0.000179705	0.00110751
itf07g18580	Zinc finger C-x8-C-x5-C-x3-H type family protein	Chr07	18556257	18560193	137.194	2.03841	0.592326	3.41386	0.000640484	0.00309342
itf07g18660	nuclear factor Y, subunit B5	Chr07	18638572	18639055	126.553	-2.04702	0.391255	-5.23286	1.66911e-07	4.33887e-06
itf07g18670	high affinity K+ transporter	Chr07	18641488	18647681	256.351	-3.79038	0.552784	-6.92975	4.21571e-12	1.12108e-09
itf07g18850	Pectin lyase-like superfamily protein	Chr07	18771913	18775245	513.313	2.30655	0.402548	5.71841	1.07523e-08	5.04295e-07
itf07g19190	lysine histidine transporter	Chr07	19048599	19051980	24.8776	-2.4658	0.54105	-4.50175	6.73959e-06	7.90545e-05
itf07g19780	copper transporter	Chr07	19928017	19928705	118.333	-2.28392	0.510918	-4.50727	6.5668e-06	7.73731e-05
itf07g20360	FER-like regulator of iron uptake	Chr07	20727753	20729779	298.778	-3.10672	0.606573	-5.15394	2.55063e-07	6.02388e-06
itf07g21010	Cytochrome P450 superfamily protein	Chr07	21517996	21521074	80.7524	-2.21827	0.68537	-3.23557	0.00121399	0.00519366
itf07g21270	ABI five binding protein	Chr07	21807253	21810293	408.123	-2.51559	0.366537	-6.87596	6.15744e-12	1.53033e-09
itf07g21970	NAC-like, activated by AP3/PI	Chr07	22377855	22379193	32.8241	-2.11385	0.542158	-3.83142	0.000127408	0.000843247
itf07g21990	conserved hypothetical protein	Chr07	22387367	22387924	31.2787	-3.3123	0.708903	-4.63683	3.53794e-06	4.76377e-05
itf07g22100	ribonuclease	Chr07	22452241	22454023	179.025	-3.36251	0.750971	-4.80482	1.54894e-06	2.48737e-05
itf07g22250	HVA22 homologue C	Chr07	22524119	22525881	51.8658	3.51295	0.593168	5.77263	7.80447e-09	3.97594e-07
itf07g22770	Protein of unknown function (DUF1336)	Chr07	22938050	22942247	249.307	-2.57431	0.461968	-5.55952	2.70525e-08	1.01611e-06
itf07g22820	Leucine-rich repeat protein kinase family protein	Chr07	22982475	22984712	55.1339	2.55931	0.435537	5.83721	5.30813e-09	2.9347e-07
itf07g22850	glucosyl transferase family	Chr07	23011748	23013094	21.5618	2.34295	0.458868	5.04304	4.58182e-07	9.50763e-06
itf07g22910	conserved hypothetical protein	Chr07	23045826	23046519	82.4368	-3.10765	0.698566	-4.38805	1.14371e-05	0.000120502
itf07g23020	DUF4228 domain containing protein	Chr07	23146128	23147508	79.2851	2.31307	0.436899	5.27405	1.33444e-07	3.59543e-06
itf07g23210	SET domain group	Chr07	23275719	23282199	19.5069	2.17157	0.478685	4.48023	7.45633e-06	8.54682e-05
itf07g23780	Minichromosome maintenance (MCM2/3/5) family protein	Chr07	23728113	23733463	212.666	2.17262	0.357227	6.06833	1.29251e-09	9.64492e-08
itf07g23900	NAD(P)-binding Rossmann-fold superfamily protein	Chr07	23798612	23800989	592.571	-2.80502	0.552429	-5.10311	3.34124e-07	7.40063e-06
itf08g00070	nucleotide transporter	Chr08	16891	21083	1027.82	2.32471	0.47368	4.8896	1.0104e-06	1.79021e-05	NCYTHA	3
itf08g00230	Protein of unknown function (DUF567)	Chr08	103007	104111	268.622	-2.06462	0.470694	-4.37945	1.18977e-05	0.000124077	NCYTHA	3
itf08g00390	PAS domain-containing protein tyrosine kinase family protein	Chr08	176306	179826	466.666	-3.5947	0.5073	-7.15807	8.18193e-13	2.86292e-10	NCYTHA	3
itf08g00420	Integrase-type DNA-binding superfamily protein	Chr08	193262	194211	12.1907	-2.98639	0.711875	-3.86509	0.00011105	0.000756056	NCYTHA	3
itf08g00610	Nucleotide-sugar transporter family protein	Chr08	298052	299713	199.482	2.14693	0.447926	4.77807	1.76983e-06	2.77472e-05	NCYTHA	3
itf08g00690	Predicted AT-hook DNA-binding family protein	Chr08	413480	414374	102.685	-2.54896	0.563644	-4.50661	6.58719e-06	7.75789e-05	NCYTHA	3
itf08g01030	nitrate transporter 1.1	Chr08	635399	639973	483.261	-3.34986	0.747059	-4.71257	2.44614e-06	3.56831e-05	NCYTHA	3
itf08g01600	Protein of unknown function (DUF581)	Chr08	1040113	1041357	221.52	2.01727	0.305625	6.59574	4.23136e-11	7.30678e-09	NCYTHA	3
itf08g02420	Uridine diphosphate glycosyltransferase 74E2	Chr08	1684430	1686888	2.68279	2.86103	0.779162	3.13746	0.00170417	0.00681797	NCYTHA	3
itf08g02430	Uridine diphosphate glycosyltransferase 74E2	Chr08	1688042	1690789	4.03603	4.74517	0.751002	5.32563	1.00606e-07	2.85728e-06	NCYTHA	3
itf08g02510	Wall-associated kinase family protein	Chr08	1736635	1739673	70.4546	-3.03815	0.620774	-4.90109	9.53077e-07	1.71599e-05	NCYTHA	3
itf08g02810	RHO guanyl-nucleotide exchange factor	Chr08	1974691	1981127	124.548	3.00309	0.51952	5.70539	1.16076e-08	5.3777e-07	NCYTHA	3
itf08g03000	expansin	Chr08	2068120	2071016	6.29457	2.73628	0.783981	3.17655	0.0014904	0.00612205	NCYTHA	3
itf08g03240	glycosyl hydrolase 9B7	Chr08	2207721	2211567	288.567	2.16286	0.451313	4.77786	1.77168e-06	2.77472e-05	NCYTHA_FYTHA	3_3
itf08g03250	Putative lysine decarboxylase family protein	Chr08	2212249	2215725	1283.5	-2.69809	0.402116	-6.72338	1.77557e-11	3.76943e-09	NCYTHA_FYTHA	3_3
itf08g03400	glyoxal oxidase-related protein	Chr08	2324624	2326521	185.448	5.13453	0.765332	6.07834	1.21435e-09	9.33332e-08	NCYTHA_FYTHA	3_3
itf08g03500	SLAC1 homologue	Chr08	2390795	2394017	6.69848	-2.36977	0.752319	-3.32362	0.000888586	0.00403452	NCYTHA_FYTHA	3_3
itf08g03640	cytokinin oxidase	Chr08	2466886	2473251	795.127	-5.25337	0.51757	-10.2005	1.97297e-24	2.62337e-20	NCYTHA_FYTHA	3_3
itf08g03700	bifunctional nuclease in basal defense response	Chr08	2524444	2527176	19.7574	-2.06311	0.453572	-4.5097	6.49181e-06	7.67274e-05	NCYTHA_FYTHA	3_3
itf08g04050	Transducin/WD40 repeat-like superfamily protein	Chr08	2711117	2712764	16.1162	2.20225	0.567911	3.77896	0.000157484	0.000996802	NCYTHA_FYTHA	3_3
itf08g04080	Protein of unknown function, DUF547	Chr08	2729559	2732993	94.9501	2.17205	0.512119	4.22175	2.4241e-05	0.000222444	NCYTHA_FYTHA_RYTHA	3_3_1
itf08g04200	Protein phosphatase 2C family protein	Chr08	2796246	2802302	80.2985	2.41677	0.419008	5.75066	8.88933e-09	4.39394e-07	NCYTHA_FYTHA_RYTHA	3_3_1
itf08g04310	cytochrome P450, family 707, subfamily A, polypeptide	Chr08	2849691	2853033	124.49	3.37341	0.641438	5.35991	8.32614e-08	2.46567e-06	NCYTHA_FYTHA_RYTHA	3_3_1
itf08g04390	Remorin family protein	Chr08	2911508	2915569	36.693	3.74474	0.62576	5.789	7.08058e-09	3.67045e-07	NCYTHA_FYTHA_RYTHA	3_3_1
itf08g04420	basic helix-loop-helix (bHLH) DNA-binding superfamily protein	Chr08	2928468	2929164	14.9996	-2.83882	0.603397	-4.25348	2.10475e-05	0.000197798	NCYTHA_FYTHA_RYTHA	3_3_1
itf08g04590	CYCLIN D3;3	Chr08	3066724	3069227	103.907	2.10908	0.352651	5.96336	2.47106e-09	1.60275e-07	NCYTHA_FYTHA_RYTHA	3_3_1
itf08g04900	Peroxisomal membrane 22 kDa (Mpv17/PMP22) family protein	Chr08	3245321	3248463	12.4508	2.19256	0.50184	4.29604	1.73877e-05	0.000168756	NCYTHA_FYTHA_RYTHA	3_3_1
itf08g05070	serine carboxypeptidase-like	Chr08	3408295	3413647	21.9308	2.06705	0.576835	3.54509	0.000392484	0.00209291	NCYTHA_FYTHA_RYTHA	3_3_1
itf08g05150	phytosulfokine 4 precursor	Chr08	3477886	3478253	13.53	2.50345	0.508109	4.80921	1.51529e-06	2.44218e-05	NCYTHA_FYTHA_RYTHA	3_3_1
itf08g05260	Integrase-type DNA-binding superfamily protein	Chr08	3563201	3566436	448.348	2.22539	0.485623	4.55647	5.20215e-06	6.43744e-05	NCYTHA_FYTHA_RYTHA	3_3_1
itf08g05350	conserved hypothetical protein	Chr08	3615063	3618684	87.7193	2.62057	0.468781	5.55849	2.72124e-08	1.01924e-06	NCYTHA_RYTHA	3_1
itf08g05360	1-amino-cyclopropane-1-carboxylate synthase	Chr08	3629115	3631656	18.4399	-3.55535	0.555324	-6.08762	1.146e-09	8.95616e-08	NCYTHA_RYTHA	3_1
itf08g05430	S-locus lectin protein kinase family protein	Chr08	3676240	3678578	1.34537	2.54879	0.794079	3.07457	0.00210805	0.00810641	NCYTHA_RYTHA	3_1
itf08g05590	Homeobox-leucine zipper protein family	Chr08	3820553	3822315	79.5882	3.73722	0.575444	6.41111	1.44462e-10	1.84696e-08	NCYTHA_RYTHA	3_1
itf08g05640	Leucine-rich receptor-like protein kinase family protein	Chr08	3915161	3919633	17.1266	-2.55086	0.624486	-3.99543	6.45759e-05	0.00048703	NCYTHA_RYTHA	3_1
itf08g05870	MSCS-like	Chr08	4107944	4114063	321.704	-2.14903	0.330183	-6.50865	7.58273e-11	1.15889e-08	NCYTHA_RYTHA	3_1
itf08g06010	Eukaryotic aspartyl protease family protein	Chr08	4207868	4209435	841.306	3.86732	0.611318	6.16133	7.21386e-10	6.45919e-08	NCYTHA_RYTHA	3_1
itf08g06240	hypothetical protein	Chr08	4365882	4366632	4.83502	-2.20288	0.555513	-3.74577	0.000179844	0.00110785	NCYTHA_RYTHA	3_1
itf08g06310	Heavy metal transport/detoxification superfamily protein	Chr08	4437923	4439047	88.4513	-3.11958	0.585349	-5.28343	1.26789e-07	3.48936e-06	NCYTHA_RYTHA	3_1
itf08g07380	Domain of unknown function (DUF23)	Chr08	5349034	5350724	135.505	2.07375	0.473274	4.37931	1.19057e-05	0.000124111	NCYTHA_RYTHA	3_1
itf08g07460	Transmembrane proteins 14C	Chr08	5438119	5440455	23.0951	2.34579	0.504225	4.5859	4.52029e-06	5.76815e-05	NCYTHA_RYTHA	3_1
itf08g07560	hypothetical protein	Chr08	5504657	5505490	1656.7	2.28367	0.519726	4.3954	1.1057e-05	0.00011724	NCYTHA_RYTHA	3_1
itf08g07570	UDP-Glycosyltransferase superfamily protein	Chr08	5505554	5508685	13891.8	2.46154	0.485406	5.07064	3.96482e-07	8.5098e-06	NCYTHA_RYTHA	3_1
itf08g07680	branchless trichome	Chr08	5604213	5605337	35.8517	-2.29697	0.45475	-5.02857	4.94155e-07	1.01241e-05	RYTHA	1
itf08g07790	myb domain protein	Chr08	5721230	5723096	265.441	-2.07875	0.508144	-4.09257	4.26617e-05	0.000348435	RYTHA	1
itf08g07850	Nodulin MtN3 family protein	Chr08	5814192	5817068	884.826	-2.73404	0.404608	-6.76993	1.28844e-11	2.90369e-09	RYTHA	1
itf08g07890	cellulose synthase like G3	Chr08	5864284	5870578	85.1814	-4.01406	0.685767	-5.80964	6.26089e-09	3.32992e-07	RYTHA	1
itf08g07910	Glutaredoxin family protein	Chr08	5920329	5922018	129.046	-2.20827	0.361611	-6.10975	9.97894e-10	8.14528e-08	RYTHA	1
itf08g07920	DUF4228 domain containing protein	Chr08	5930611	5931517	117.099	2.34989	0.465982	5.02306	5.08544e-07	1.03526e-05	RYTHA	1
itf08g07990	Pentatricopeptide repeat (PPR) superfamily protein	Chr08	5979130	5987908	776.227	-2.11256	0.328902	-6.42791	1.29367e-10	1.68696e-08	RYTHA	1
itf08g08230	camphor resistance CrcB family protein	Chr08	6244792	6249300	27.9704	-2.10582	0.502618	-4.16541	3.10792e-05	0.000270802	RYTHA	1
itf08g08560	brassinosteroid-responsive RING-H2	Chr08	6560518	6561097	4.72979	2.30018	0.703671	3.08711	0.00202114	0.00782475	RYTHA	1
itf08g08590	pectin methylesterase inhibitor	Chr08	6586718	6587315	33.1748	-2.3635	0.573668	-4.08591	4.39048e-05	0.000357161	RYTHA	1
itf08g08600	pectin methylesterase inhibitor	Chr08	6593877	6594495	42.0434	-2.04809	0.546152	-3.71239	0.00020531	0.00123693	RYTHA	1
itf08g08660	cytochrome P450, family 706, subfamily A, polypeptide	Chr08	6664785	6667888	3.43184	2.91937	0.760123	3.65648	0.000255704	0.00148147	RYTHA	1
itf08g08770	protein binding	Chr08	6793531	6794434	52.4803	2.24719	0.405941	5.51623	3.4634e-08	1.23131e-06	RYTHA	1
itf08g09020	BCL-2-associated athanogene	Chr08	7021698	7023800	30.4801	2.56453	0.488212	5.19725	2.02255e-07	5.05979e-06	RYTHA	1
itf08g09220	wall-associated kinase	Chr08	7184774	7188117	56.3252	-2.67497	0.574783	-4.65147	3.29584e-06	4.53187e-05	RYTHA	1
itf08g09240	HXXXD-type acyl-transferase family protein	Chr08	7223943	7228516	28.9444	-3.60532	0.668945	-5.11165	3.19362e-07	7.17898e-06	RYTHA	1
itf08g09270	formin homology	Chr08	7244739	7249151	35.9899	2.20489	0.488503	4.46955	7.83853e-06	8.88142e-05	RYTHA	1
itf08g09490	Ankyrin repeat family protein	Chr08	7516102	7527829	551.476	2.87982	0.572819	5.09271	3.52981e-07	7.7449e-06	RYTHA	1
itf08g09760	homolog of carrot EP3-3 chitinase	Chr08	7821575	7822980	29.6969	-3.2723	0.678573	-4.73655	2.17387e-06	3.27349e-05	RYTHA	1
itf08g09770	homolog of carrot EP3-3 chitinase	Chr08	7832716	7833507	6.2375	-3.12044	0.748679	-3.77798	0.000158103	0.0010001	RYTHA	1
itf08g09780	homolog of carrot EP3-3 chitinase	Chr08	7839926	7841322	6.78132	-2.97744	0.71881	-3.83477	0.000125682	0.000834107	RYTHA	1
itf08g10290	jasmonic acid carboxyl methyltransferase	Chr08	8623368	8627009	52.0315	-2.02801	0.412003	-4.9053	9.32866e-07	1.68875e-05	RYTHA	1
itf08g11290	chaperone protein dnaJ-related	Chr08	9845469	9846150	18.6568	-2.69811	0.508563	-5.19111	2.09044e-07	5.18573e-06	RYTHA	1
itf08g11800	xyloglucan:xyloglucosyl transferase	Chr08	10530285	10533061	637.804	2.56445	0.534302	4.77295	1.81549e-06	2.82831e-05	RYTHA	1
itf08g11910	NHL domain-containing protein	Chr08	10716053	10720230	356.316	2.60312	0.49891	5.17501	2.279e-07	5.54488e-06	RYTHA	1
itf08g12090	nodulin MtN21 /EamA-like transporter family protein	Chr08	11004157	11010795	34.2597	-3.01172	0.533243	-5.56791	2.57819e-08	9.78056e-07	RYTHA	1
itf08g12130	DUF4228 domain containing protein	Chr08	11050566	11052437	251.441	-2.1909	0.357374	-6.13443	8.54662e-10	7.26135e-08	RYTHA	1
itf08g12300	IAA-leucine resistant (ILR)-like	Chr08	11204506	11209479	120.392	-3.2861	0.500363	-6.54269	6.04229e-11	9.79772e-09	RYTHA	1
itf08g12700	Disease resistance protein (TIR-NBS class)	Chr08	11654007	11654514	3.3709	-3.2017	0.732901	-4.28667	1.81373e-05	0.000174756	RYTHA	1
itf08g12710	transmembrane receptors;ATP binding	Chr08	11660126	11663705	62.9327	-2.66702	0.508369	-5.22788	1.71468e-07	4.42703e-06	RYTHA	1
itf08g12770	2-oxoglutarate (2OG) and Fe(II)-dependent oxygenase superfamily protein	Chr08	11741330	11743095	566.425	-2.98167	0.793548	-4.54892	5.39214e-06	6.62018e-05	RYTHA	1
itf08g13440	Oxidoreductase, zinc-binding dehydrogenase family protein	Chr08	12429187	12433357	450.312	2.13539	0.376035	5.67855	1.35841e-08	5.97095e-07	RYTHA	1
itf08g13510	Protein of unknown function (DUF1645)	Chr08	12483972	12494116	75.2106	-3.1921	0.621644	-5.13667	2.79645e-07	6.48917e-06	RYTHA	1
itf08g13590	beta-6 tubulin	Chr08	12708991	12710979	115.143	2.30438	0.526476	4.34518	1.39163e-05	0.000141266	RYTHA	1
itf08g13610	tubulin beta	Chr08	12711747	12712519	638.639	2.21283	0.438371	5.02587	5.01144e-07	1.02279e-05	RYTHA	1
itf08g13740	Nucleotide-diphospho-sugar transferase family protein	Chr08	12864599	12868911	15.1561	-2.14356	0.571494	-3.69958	0.000215957	0.00128765	RYTHA	1
itf08g14390	Plant protein of unknown function (DUF828)	Chr08	13858957	13862268	30.871	2.93751	0.486401	5.95947	2.53055e-09	1.62908e-07	RYTHA	1
itf08g14810	Pectin lyase-like superfamily protein	Chr08	14533978	14538387	301.11	4.64397	0.682412	6.41627	1.39656e-10	1.79414e-08	RYTHA	1
itf08g14820	DEK domain-containing chromatin associated protein	Chr08	14544981	14549880	8.80024	2.34217	0.547488	4.1543	3.26282e-05	0.00028144	RYTHA	1
itf08g15320	conserved hypothetical protein	Chr08	14934418	14936647	43.1857	2.40904	0.577815	4.09896	4.15006e-05	0.000341152	RYTHA	1
itf08g15330	EXORDIUM like	Chr08	14939329	14940964	985.485	3.12809	0.551272	5.6661	1.46081e-08	6.28598e-07	RYTHA	1
itf08g15440	GDSL-like Lipase/Acylhydrolase superfamily protein	Chr08	14990782	14992404	4.13143	-2.87361	0.760455	-3.95567	7.63192e-05	0.000557877	RYTHA	1
itf08g16420	transmembrane receptors;ATP binding	Chr08	15781977	15782466	5.61668	3.34204	0.7224	4.2047	2.61423e-05	0.000236253
itf08g16430	disease resistance protein (TIR-NBS-LRR class), putative	Chr08	15787503	15794041	47.1937	2.53932	0.688895	3.62313	0.000291062	0.00164529
itf08g17150	Pectate lyase family protein	Chr08	16949410	16951786	59.2242	3.33602	0.606691	5.4117	6.24306e-08	1.96012e-06
itf08g17470	Nucleotide-diphospho-sugar transferases superfamily protein	Chr08	17589698	17592201	675.436	2.07972	0.381506	5.44135	5.28779e-08	1.72209e-06
itf08g18040	multidrug resistance-associated protein	Chr08	18312911	18319851	74.3094	-2.29292	0.491738	-4.64666	3.37353e-06	4.60299e-05
itf08g18190	DNA polymerase alpha	Chr08	18472698	18479421	84.6024	2.28287	0.357742	6.36402	1.96542e-10	2.248e-08
itf08g18730	ARM repeat superfamily protein	Chr08	18994321	18999229	11.2324	2.21807	0.630032	3.45983	0.000540507	0.00270691
itf09g00060	conserved hypothetical protein	Chr09	35290	35791	170.934	2.43836	0.510933	4.74905	2.04379e-06	3.10752e-05
itf09g00260	O-methyltransferase family protein	Chr09	127418	128730	9.15692	-2.99864	0.662506	-4.0852	4.40398e-05	0.000357826
itf09g00280	Major facilitator superfamily protein	Chr09	138744	142366	3.95776	-3.03383	0.745115	-4.06098	4.88675e-05	0.000388036
itf09g00410	plasma membrane intrinsic protein 2;8	Chr09	195898	197583	80.3569	2.05654	0.442426	4.62592	3.72932e-06	4.97112e-05
itf09g00500	Senescence/dehydration-associated protein-related	Chr09	257632	259801	1772.27	-2.09003	0.396361	-5.27174	1.35137e-07	3.63366e-06
itf09g00560	Pathogenesis-related thaumatin superfamily protein	Chr09	277284	279256	279.49	2.48516	0.445698	5.56447	2.62951e-08	9.94689e-07
itf09g00670	rotamase CYP	Chr09	304160	305004	110.831	2.8834	0.467831	6.13924	8.29177e-10	7.113e-08
itf09g00680	proline-rich protein	Chr09	305976	307449	680.686	2.78829	0.580276	4.76917	1.8499e-06	2.87427e-05
itf09g00890	fructose-bisphosphate aldolase	Chr09	387509	390121	441.895	4.68503	0.658282	7.13856	9.43134e-13	3.1351e-10
itf09g00900	glycosyl hydrolase 9B18	Chr09	391303	395466	115.856	3.72473	0.574645	6.33688	2.34466e-10	2.5872e-08
itf09g01160	Glucose-1-phosphate adenylyltransferase family protein	Chr09	537321	541698	37085.4	3.46176	0.569294	6.15463	7.5252e-10	6.60454e-08
itf09g01640	carboxyesterase	Chr09	792815	794008	189.785	-3.5883	0.595757	-5.98117	2.21542e-09	1.47656e-07	NONC_TNR	5_6
itf09g01650	alpha/beta-Hydrolases superfamily protein	Chr09	795608	796739	412.816	-3.80361	0.432485	-8.81226	1.22646e-18	3.26152e-15	NONC_TNR	5_6
itf09g01890	UDP-glucosyl transferase 73B3	Chr09	917205	919109	1094.48	-2.00254	0.475	-4.22127	2.42931e-05	0.000222768	NONC_TNR	5_6
itf09g02060	Leucine-rich repeat protein kinase family protein	Chr09	971943	975628	178.141	3.13749	0.507777	6.13447	8.54439e-10	7.26135e-08	NONC_TNR	5_6
itf09g02120	basic helix-loop-helix (bHLH) DNA-binding superfamily protein	Chr09	1003902	1005243	21.0328	3.36417	0.556071	5.81965	5.89719e-09	3.20049e-07	NONC_TNR	5_6
itf09g02510	CYCLIN D1;1	Chr09	1182258	1184151	11.0989	2.48493	0.563498	4.28348	1.8399e-05	0.000176956	NONC_TNR	5_6
itf09g02560	Protein kinase family protein with leucine-rich repeat domain	Chr09	1203277	1205285	9.7917	-2.36658	0.668054	-3.43425	0.000594186	0.00292235	NONC_TNR	5_6
itf09g02830	chlorophyllase	Chr09	1335641	1337728	21.0963	-2.39138	0.447013	-5.27657	1.31623e-07	3.56011e-06	NONC_TNR	5_6
itf09g02980	Class I glutamine amidotransferase-like superfamily protein	Chr09	1423250	1427844	511.156	-2.62629	0.562808	-4.69261	2.69742e-06	3.86282e-05	NONC_TNR_NOCR	5_6_6
itf09g03310	LMBR1-like membrane protein	Chr09	1550964	1557220	11.4163	2.49637	0.752454	3.03961	0.00236881	0.0089037	NONC_TNR_NOCR	5_6_6
itf09g03460	phytochrome-associated protein phosphatase type 2C	Chr09	1626386	1629256	103.991	-2.07612	0.35395	-5.85845	4.67203e-09	2.66044e-07	NONC_TNR_NOCR	5_6_6
itf09g03570	sulfate transporter 1;2	Chr09	1685609	1689876	63.3926	-2.5538	0.753136	-3.32552	0.000882528	0.00401292	NONC_TNR_NOCR	5_6_6
itf09g03630	beta-D-xylosidase	Chr09	1726727	1732299	39.5277	2.61993	0.507895	5.0913	3.55614e-07	7.78342e-06	NONC_TNR_NOCR	5_6_6
itf09g04620	Protein of unknown function (DUF506)	Chr09	2299074	2300557	8.99713	2.18671	0.720495	3.0097	0.00261509	0.00962799	NONC_TNR_NOCR	5_6_6
itf09g04660	Ubiquitin-specific protease family C19-related protein	Chr09	2321719	2325287	58.3914	2.42795	0.546047	4.4329	9.29755e-06	0.000101917	NONC_TNR_NOCR	5_6_6
itf09g04680	Protein of unknown function (DUF3537)	Chr09	2328282	2330575	12.7055	-3.03919	0.77857	-4.09276	4.26261e-05	0.000348251	NONC_TNR_NOCR	5_6_6
itf09g04750	Phosphofructokinase family protein	Chr09	2368185	2373411	464.704	2.10539	0.381338	5.51361	3.51543e-08	1.24648e-06	NONC_TNR_NOCR	5_6_6
itf09g04880	F-box family protein with a domain of unknown function (DUF295)	Chr09	2451921	2453267	95.0532	-2.66506	0.560871	-4.7378	2.16052e-06	3.25523e-05	NONC_TNR_NOCR	5_6_6
itf09g04960	O-Glycosyl hydrolases family 17 protein	Chr09	2502967	2506416	80.4809	3.68186	0.556272	6.4963	8.23221e-11	1.2095e-08	NONC_TNR_NOCR	5_6_6
itf09g05330	Late embryogenesis abundant (LEA) hydroxyproline-rich glycoprotein family	Chr09	2692886	2693920	12.211	-2.23851	0.533614	-4.11914	3.80296e-05	0.000318226	TNR_NOCR	6_6
itf09g05530	cysteine-rich RLK (RECEPTOR-like protein kinase)	Chr09	2806239	2809208	363.409	-2.11696	0.475881	-4.45951	8.2146e-06	9.25639e-05	TNR_NOCR	6_6
itf09g05580	Terpenoid cyclases/Protein prenyltransferases superfamily protein	Chr09	2839580	2842504	13.628	-3.76356	0.686819	-4.63499	3.5695e-06	4.78929e-05	TNR_NOCR	6_6
itf09g05820	Calcium-binding EF-hand family protein	Chr09	2971304	2971871	27.7061	2.32147	0.65158	3.46269	0.000534811	0.00268496	TNR_NOCR	6_6
itf09g05830	Peroxidase superfamily protein	Chr09	2975106	2976462	41.7384	-2.43277	0.657689	-3.5996	0.00031871	0.00176793	TNR_NOCR	6_6
itf09g06310	conserved hypothetical protein	Chr09	3259471	3260180	6.93981	2.28024	0.590711	3.72247	0.000197282	0.00119479	TNR_NOCR	6_6
itf09g06480	alpha/beta-Hydrolases superfamily protein	Chr09	3387156	3389330	5.46223	3.12817	0.804095	3.7575	0.000171623	0.00106839	TNR_NOCR	6_6
itf09g06570	fatty acid desaturase family protein	Chr09	3423147	3426016	172.661	3.66354	0.566806	6.36393	1.9666e-10	2.248e-08	TNR_NOCR	6_6
itf09g06810	hypothetical protein	Chr09	3509450	3509708	59.031	2.75704	0.52673	5.1594	2.47737e-07	5.90858e-06	TNR_NOCR	6_6
itf09g06910	MAC/Perforin domain-containing protein	Chr09	3576272	3579877	102.719	-2.16833	0.454532	-4.76813	1.85947e-06	2.88138e-05	TNR_NOCR	6_6
itf09g07170	sodium/calcium exchanger family protein / calcium-binding EF hand family protein	Chr09	3750587	3754764	168.45	-2.13575	0.471589	-4.52538	6.02885e-06	7.25125e-05	TNR_NOCR	6_6
itf09g07190	GDSL-like Lipase/Acylhydrolase superfamily protein	Chr09	3773126	3776118	108.326	-4.19264	0.538796	-7.68834	1.49059e-14	1.20119e-11	TNR_NOCR	6_6
itf09g07200	GDSL-like Lipase/Acylhydrolase superfamily protein	Chr09	3787322	3790185	143.414	-3.68529	0.488879	-7.54322	4.58503e-14	3.1264e-11	TNR_NOCR	6_6
itf09g07260	GDSL-like Lipase/Acylhydrolase superfamily protein	Chr09	3842654	3847470	60.5955	2.21248	0.512194	4.26171	2.02871e-05	0.000191786	TNR_NOCR	6_6
itf09g07560	glycosyl hydrolase 9B8	Chr09	4061458	4065679	35.4523	3.26119	0.572363	5.58522	2.33406e-08	9.04563e-07	TNR	6
itf09g07610	O-Glycosyl hydrolases family 17 protein	Chr09	4089070	4091894	68.3301	2.28067	0.505083	4.4858	7.26411e-06	8.36616e-05	TNR	6
itf09g07930	FASCICLIN-like arabinogalactan	Chr09	4259690	4261472	1467.95	2.16448	0.415488	5.20083	1.98399e-07	4.9804e-06	TNR	6
itf09g08180	disease resistance family protein / LRR family protein	Chr09	4406773	4409743	4.17467	2.20424	0.678	3.07259	0.00212212	0.00814454	TNR	6
itf09g08300	hypothetical protein	Chr09	4491011	4491887	101.006	3.05331	0.697067	4.64287	3.43596e-06	4.65949e-05	TNR	6
itf09g08380	conserved hypothetical protein	Chr09	4528282	4529308	15.0037	2.54536	0.737001	3.34503	0.000822742	0.00379574	TNR	6
itf09g08400	FAD-binding Berberine family protein	Chr09	4538670	4540269	67.8483	2.20283	0.611937	3.58926	0.00033162	0.00182707	TNR	6
itf09g08450	FAD-binding Berberine family protein	Chr09	4569690	4571277	94.6581	-2.72656	0.647561	-4.13292	3.58183e-05	0.000303929	TNR	6
itf09g08460	FAD-binding Berberine family protein	Chr09	4576444	4578034	35.1207	-2.59776	0.384527	-6.69736	2.12217e-11	4.34114e-09	TNR	6
itf09g08470	FAD-binding Berberine family protein	Chr09	4582798	4584385	74.2897	-3.53057	0.578557	-6.01776	1.76852e-09	1.23439e-07	TNR	6
itf09g08550	myb-like HTH transcriptional regulator family protein	Chr09	4652867	4656287	250.031	2.92117	0.387492	7.52802	5.15143e-14	3.4248e-11	TNR	6
itf09g08650	Eukaryotic aspartyl protease family protein	Chr09	4707913	4709871	20.7964	2.19729	0.417325	5.21315	1.8566e-07	4.73826e-06	TNR	6
itf09g08700	C2H2 and C2HC zinc fingers superfamily protein	Chr09	4731988	4732531	4.47128	-3.28554	0.794389	-4.1169	3.83997e-05	0.000320617	TNR	6
itf09g08710	zinc-finger protein	Chr09	4747853	4748576	138.444	-2.02453	0.527597	-3.84673	0.000119704	0.000802037	TNR	6
itf09g08770	NAD(P)-binding Rossmann-fold superfamily protein	Chr09	4779974	4781336	9.43852	-2.33974	0.739884	-3.05963	0.00221609	0.00843217	TNR	6
itf09g08810	laccase	Chr09	4802465	4805054	19.8423	-2.07278	0.605944	-3.41092	0.000647451	0.00311813	TNR	6
itf09g08860	POX (plant homeobox) family protein	Chr09	4835880	4840116	317.26	2.46667	0.406297	6.07089	1.27203e-09	9.64492e-08	TNR	6
itf09g08900	conserved hypothetical protein	Chr09	4870373	4871749	297.008	-2.20375	0.473652	-4.673	2.96827e-06	4.16621e-05	TNR	6
itf09g09020	high cyclic electron flow	Chr09	4926848	4928875	17.1637	2.30159	0.533793	4.23842	2.25101e-05	0.000208648	TNR	6
itf09g09030	conserved hypothetical protein	Chr09	4928932	4931097	5.02965	2.48181	0.657514	3.5418	0.000397404	0.00211406
itf09g09260	cation exchanger	Chr09	5112938	5116510	2365.1	-3.44713	0.575144	-5.96584	2.43379e-09	1.58244e-07
itf09g09340	2-oxoglutarate (2OG) and Fe(II)-dependent oxygenase superfamily protein	Chr09	5174526	5177830	38.8694	-2.63804	0.673124	-3.93247	8.40784e-05	0.000605114
itf09g09420	Thiamine pyrophosphate dependent pyruvate decarboxylase family protein	Chr09	5256602	5259127	337.355	3.24221	0.704513	4.37767	1.19956e-05	0.000124902
itf09g09540	Protein of unknown function, DUF538	Chr09	5320100	5322631	77.4186	3.16892	0.505132	6.18947	6.03663e-10	5.48418e-08
itf09g09760	ENTH/VHS/GAT family protein	Chr09	5418908	5422764	133.427	-2.22666	0.407107	-5.46727	4.57016e-08	1.53841e-06
itf09g09810	aspartate aminotransferase	Chr09	5454153	5457959	670.938	2.23615	0.466298	4.78256	1.73077e-06	2.72829e-05
itf09g10100	hypothetical protein	Chr09	5661479	5663052	300.219	-3.23275	0.587575	-5.57004	2.5468e-08	9.70303e-07
itf09g10260	protein kinases;ubiquitin-protein ligases	Chr09	5749301	5750995	11.7081	2.01391	0.501881	3.94772	7.88984e-05	0.00057342
itf09g10600	UDP-Glycosyltransferase superfamily protein	Chr09	5951387	5953210	44.1574	2.43451	0.68945	3.4453	0.000570434	0.00283014
itf09g10720	DHHC-type zinc finger family protein	Chr09	6020908	6025692	12.6111	-2.44239	0.455478	-5.23641	1.63726e-07	4.26859e-06
itf09g10860	Protein kinase protein with adenine nucleotide alpha hydrolases-like domain	Chr09	6121368	6124054	1.64537	-2.47965	0.773033	-3.24259	0.00118447	0.00508773
itf09g10990	Major facilitator superfamily protein	Chr09	6212521	6218017	851.314	-2.02476	0.360117	-5.62164	1.89151e-08	7.69125e-07
itf09g11060	beta-6 tubulin	Chr09	6289201	6291830	4813.7	2.38892	0.435072	5.46789	4.55425e-08	1.535e-06
itf09g11130	cytochrome p450 79a2	Chr09	6361127	6362699	36.5329	-2.79155	0.705169	-3.78767	0.000152066	0.000969062
itf09g11150	cytochrome p450 79a2	Chr09	6374083	6375731	89.9939	-2.40152	0.713623	-3.28943	0.00100389	0.00445388
itf09g11170	cytochrome p450 79a2	Chr09	6392909	6393944	9.90072	-3.10908	0.728064	-3.97147	7.1429e-05	0.000528817
itf09g11220	Tetratricopeptide repeat (TPR)-like superfamily protein	Chr09	6450248	6452004	7.36588	3.9613	0.710182	4.7172	2.39112e-06	3.51115e-05
itf09g11520	Haloacid dehalogenase-like hydrolase (HAD) superfamily protein	Chr09	6640042	6643874	1178.7	-2.51188	0.51192	-4.9221	8.56209e-07	1.56955e-05
itf09g11750	UDP-glycosyltransferase 73B4	Chr09	6812009	6813725	139.79	-3.49085	0.530368	-6.6076	3.90597e-11	6.8789e-09
itf09g11760	UDP-glucosyl transferase 73C6	Chr09	6821949	6823660	83.6284	-2.74014	0.472429	-5.78294	7.34056e-09	3.77578e-07
itf09g11780	UDP-glucosyltransferase 73B2	Chr09	6832932	6834395	84.1552	-2.03618	0.400601	-5.07454	3.88426e-07	8.3646e-06
itf09g12120	Chaperone DnaJ-domain superfamily protein	Chr09	7118493	7121314	35.0424	2.14977	0.439602	4.84799	1.24719e-06	2.09559e-05
itf09g12150	basic helix-loop-helix (bHLH) DNA-binding superfamily protein	Chr09	7131492	7137193	58.9648	-2.04346	0.340221	-5.99097	2.08587e-09	1.41866e-07
itf09g12170	bZIP transcription factor family protein	Chr09	7153858	7157885	11.5906	-3.04584	0.748147	-3.95908	7.52397e-05	0.000550895
itf09g12770	conserved hypothetical protein	Chr09	7592517	7593967	34.0231	-2.90572	0.519735	-5.52748	3.24861e-08	1.17219e-06
itf09g13000	NDR1/HIN1-like	Chr09	7791285	7792263	499.631	2.63556	0.429496	6.14248	8.12435e-10	7.04354e-08
itf09g13020	Putative lysine decarboxylase family protein	Chr09	7815799	7820299	42.9968	-2.23353	0.346788	-6.40881	1.46661e-10	1.85722e-08
itf09g13030	2-cysteine peroxiredoxin B	Chr09	7828188	7830762	411.254	2.05261	0.32389	6.33309	2.40295e-10	2.64057e-08
itf09g13140	NAD(P)-binding Rossmann-fold superfamily protein	Chr09	7901181	7902112	7.52679	-2.67611	0.805965	-3.53769	0.00040364	0.00213867
itf09g13210	NAD(P)-binding Rossmann-fold superfamily protein	Chr09	7958838	7959739	4.60097	-2.56281	0.81005	-3.40714	0.000656477	0.00315577
itf09g13300	AP2/B3-like transcriptional factor family protein	Chr09	8051099	8055460	80.7236	-4.42961	0.555667	-7.737	1.01793e-14	1.00259e-11
itf09g13920	Duplicated homeodomain-like superfamily protein	Chr09	8597949	8600091	227.916	2.95223	0.543286	5.44753	5.10729e-08	1.68092e-06
itf09g14110	sequence-specific DNA binding transcription factors	Chr09	8745994	8747328	145.542	2.83495	0.706497	3.77188	0.00016202	0.00102003
itf09g14270	permease, cytosine/purines, uracil, thiamine, allantoin family protein	Chr09	8901212	8903113	3.66975	3.29414	0.645535	4.20139	2.6528e-05	0.000238895
itf09g14470	Pectin lyase-like superfamily protein	Chr09	9045784	9049699	56.8128	2.11821	0.39152	5.38292	7.3288e-08	2.23247e-06
itf09g14510	Major facilitator superfamily protein	Chr09	9087996	9089778	5.99328	-2.2793	0.711699	-3.07084	0.00213457	0.00818286
itf09g14540	xyloglucan endotransglucosylase/hydrolase	Chr09	9110909	9113553	449.231	2.91188	0.657296	4.32667	1.51381e-05	0.000151341
itf09g14620	ATP binding cassette subfamily B1	Chr09	9188839	9194964	308.367	2.07465	0.328582	6.30632	2.85746e-10	3.05174e-08
itf09g14880	lysine decarboxylase family protein	Chr09	9507275	9511398	134.569	-2.33838	0.481359	-4.8466	1.25595e-06	2.10457e-05
itf09g15020	conserved hypothetical protein	Chr09	9624149	9625295	9.28528	3.01307	0.715165	3.90819	9.29897e-05	0.000656457
itf09g15250	conserved hypothetical protein	Chr09	9796682	9799463	6.33193	2.34679	0.628032	3.40706	0.000656669	0.00315612
itf09g15510	Eukaryotic aspartyl protease family protein	Chr09	10018151	10020921	387.742	3.22385	0.545106	5.8669	4.44024e-09	2.56138e-07
itf09g15760	uclacyanin	Chr09	10218901	10219707	195.242	-3.48836	0.635065	-5.47416	4.39592e-08	1.48729e-06
itf09g15890	IQ-domain	Chr09	10291841	10295218	54.2165	4.1658	0.629162	6.50079	7.98994e-11	1.18551e-08
itf09g16080	NAD(P)-binding Rossmann-fold superfamily protein	Chr09	10560721	10562992	2.22172	-2.7622	0.697724	-3.37072	0.000749722	0.00351629
itf09g16150	NAD(P)-binding Rossmann-fold superfamily protein	Chr09	10629211	10638690	23.6613	3.33614	0.594031	5.11149	3.1963e-07	7.17898e-06
itf09g16300	polyamine oxidase	Chr09	10899857	10906485	493.717	-2.95551	0.537499	-5.49857	3.82877e-08	1.33096e-06
itf09g16510	MATE efflux family protein	Chr09	11127147	11131143	499.679	-2.85951	0.602193	-4.73469	2.19394e-06	3.29624e-05
itf09g16790	minichromosome maintenance (MCM2/3/5) family protein	Chr09	11513272	11516440	66.6363	2.10371	0.482783	4.31674	1.58354e-05	0.000156663
itf09g16800	minichromosome maintenance (MCM2/3/5) family protein	Chr09	11516601	11517874	43.0339	2.07867	0.450124	4.57909	4.6701e-06	5.91954e-05
itf09g16920	Leucine-rich repeat (LRR) family protein	Chr09	11670566	11672158	124.117	3.06919	0.559824	5.43532	5.4699e-08	1.7696e-06
itf09g16990	Histone superfamily protein	Chr09	11800053	11801330	23.4243	2.18728	0.496073	4.34858	1.37025e-05	0.00013956
itf09g17110	GDSL lipase	Chr09	11923116	11928366	33.4293	-3.29964	0.773351	-4.22981	2.33889e-05	0.000215816
itf09g17220	GDSL lipase	Chr09	12044075	12045902	10.8405	-2.12791	0.65716	-3.16002	0.00157758	0.00639521
itf09g17500	VQ motif-containing protein	Chr09	12472395	12472857	6.06988	-2.42839	0.764995	-3.0313	0.00243504	0.00910249
itf09g17530	sigma factor binding protein	Chr09	12530319	12530943	189.742	-2.15301	0.412816	-5.21333	1.85479e-07	4.73818e-06
itf09g17600	conserved hypothetical protein	Chr09	12596971	12597647	466.461	-2.77173	0.49318	-5.68694	1.29333e-08	5.81956e-07
itf09g17780	bZIP transcription factor family protein	Chr09	12932958	12939664	99.0376	-2.02855	0.490006	-4.13895	3.489e-05	0.000297859
itf09g18690	Protein of unknown function (DUF581)	Chr09	14163178	14164574	62.0534	2.1608	0.518902	4.14349	3.42059e-05	0.000292865
itf09g19750	S-adenosyl-L-methionine-dependent methyltransferases superfamily protein	Chr09	15640071	15641445	14.971	3.62838	0.655943	5.23066	1.68907e-07	4.3822e-06
itf09g19770	RING/U-box superfamily protein	Chr09	15655369	15656136	4.7124	2.24859	0.596312	3.58009	0.000343479	0.00187868
itf09g20830	NAD(P)-binding Rossmann-fold superfamily protein	Chr09	17374979	17378634	629.095	2.06045	0.56181	3.66903	0.000243471	0.00142613
itf09g21550	UDP-galactose transporter	Chr09	18278651	18281498	61.2027	-2.11106	0.589649	-3.57328	0.000352537	0.00191954
itf09g21780	NAD(P)-binding Rossmann-fold superfamily protein	Chr09	18504064	18508246	15.7676	2.28796	0.737734	3.00993	0.0026131	0.00962335
itf09g21960	GAST1 protein homolog	Chr09	18714017	18714483	16.3226	3.73926	0.629389	5.64227	1.67819e-08	7.017e-07
itf09g22030	conserved hypothetical protein	Chr09	18779513	18780383	93.2263	-2.01928	0.473104	-4.26441	2.00429e-05	0.000189748
itf09g22550	Aluminium activated malate transporter family protein	Chr09	19284154	19288351	223.98	-3.75091	0.77683	-5.97642	2.28095e-09	1.50514e-07
itf09g22660	Plant protein of unknown function (DUF868)	Chr09	19412071	19413145	41.6605	3.66764	0.607279	5.81861	5.93407e-09	3.21394e-07
itf09g24330	gamma histone variant H2AX	Chr09	20657170	20657599	39.7556	2.72984	0.415511	6.51178	7.4264e-11	1.14156e-08
itf09g24360	gamma histone variant H2AX	Chr09	20707584	20708010	27.1116	2.6074	0.488461	5.27703	1.31292e-07	3.56011e-06
itf09g25220	NAC domain containing protein	Chr09	21841521	21844050	295.763	2.41911	0.537889	4.49942	6.81381e-06	7.97183e-05
itf09g25230	RmlC-like cupins superfamily protein	Chr09	21888867	21889647	484.225	2.12514	0.544597	3.8405	0.000122785	0.00081938
itf09g25270	RmlC-like cupins superfamily protein	Chr09	21905139	21906385	34.1393	2.0809	0.566593	3.61591	0.000299294	0.0016802
itf09g26100	vesicle associated protein	Chr09	22600601	22603200	7.75758	2.05303	0.563571	3.54459	0.000393219	0.00209599
itf09g26390	conserved hypothetical protein	Chr09	22760881	22761969	62.5806	2.01917	0.377092	5.34264	9.16045e-08	2.66525e-06
itf09g27270	Remorin family protein	Chr09	23345028	23346650	299.354	-2.18361	0.330493	-6.60917	3.86483e-11	6.8789e-09
itf10g00170	Seed maturation protein	Chr10	322824	324697	35.3447	2.08728	0.487678	4.25263	2.11275e-05	0.000198251
itf10g00710	arabinose kinase	Chr10	635392	646354	821.503	-2.04521	0.393415	-5.20542	1.93563e-07	4.9023e-06
itf10g00760	cryptochrome	Chr10	661894	666327	18.3432	2.45388	0.542492	4.44475	8.79934e-06	9.77447e-05
itf10g00810	Nucleotide-diphospho-sugar transferase family protein	Chr10	715323	719041	232.329	2.07839	0.335222	6.19644	5.77561e-10	5.29624e-08
itf10g00970	SKU5 similar	Chr10	848267	852680	748.853	2.86744	0.58469	4.77668	1.78212e-06	2.78612e-05
itf10g01100	conserved hypothetical protein	Chr10	904538	906502	8.05053	-2.18307	0.620697	-3.41443	0.000639164	0.00308967
itf10g01450	conserved hypothetical protein	Chr10	1182749	1184240	137.574	2.7982	0.455883	6.0938	1.10259e-09	8.68544e-08
itf10g01730	S-locus lectin protein kinase family protein	Chr10	1359848	1361031	20.977	-2.73927	0.552537	-4.87896	1.06647e-06	1.8646e-05
itf10g01910	Protein of unknown function (DUF1218)	Chr10	1556318	1558545	147.618	2.57892	0.446884	5.74804	9.02825e-09	4.44608e-07
itf10g02010	sulfotransferase	Chr10	1605391	1608227	50.1534	4.46193	0.562561	7.42409	1.13559e-13	6.29139e-11
itf10g02030	sulfotransferase	Chr10	1624728	1625652	85.0892	3.18509	0.668638	4.78513	1.70881e-06	2.69688e-05
itf10g02070	sulfotransferase	Chr10	1658556	1659474	7.28408	-2.72192	0.701069	-3.67558	0.000237308	0.00139526
itf10g02090	sulfotransferase	Chr10	1664819	1665734	10.7359	2.73382	0.714401	3.48471	0.000492663	0.00250648
itf10g02550	Protein of unknown function (DUF640)	Chr10	2088301	2088877	246.715	2.12338	0.447888	4.74239	2.1121e-06	3.19494e-05	FYTHA	4
itf10g02600	Protein of unknown function (DUF688)	Chr10	2151545	2154953	139.607	2.79861	0.416541	6.69025	2.22791e-11	4.48839e-09	FYTHA	4
itf10g02760	Leucine-rich repeat protein kinase family protein	Chr10	2288574	2292021	42.2934	2.62276	0.514187	5.05221	4.36718e-07	9.16625e-06	FYTHA	4
itf10g02780	Leucine-rich repeat protein kinase family protein	Chr10	2307660	2312426	5.50194	2.25002	0.634703	3.38478	0.000712356	0.00337196	FYTHA	4
itf10g02850	receptor like protein	Chr10	2359503	2361014	19.729	2.52963	0.484977	5.13206	2.86589e-07	6.58709e-06	FYTHA	4
itf10g03220	subtilase family protein	Chr10	2737501	2742420	21.9021	-3.49915	0.620857	-5.44595	5.15301e-08	1.69178e-06	FYTHA	4
itf10g03300	senescence-related gene	Chr10	2843603	2845818	7.51814	-3.04463	0.78042	-4.26213	2.02485e-05	0.00019149	FYTHA	4
itf10g03310	senescence-related gene	Chr10	2850025	2852917	8.84847	-3.39954	0.729356	-4.20802	2.57615e-05	0.000233575	FYTHA	4
itf10g03510	senescence-related gene	Chr10	3053406	3055549	84.2821	-2.32004	0.661383	-3.49048	0.000482151	0.00246384	FYTHA_NCYTHA	4_4
itf10g04020	Minichromosome maintenance (MCM2/3/5) family protein	Chr10	3483466	3488866	231.143	2.28576	0.384364	5.92539	3.11549e-09	1.9134e-07	NCYTHA	4
itf10g04080	UDP-Glycosyltransferase superfamily protein	Chr10	3539768	3541244	138.07	-2.8197	0.483761	-5.83957	5.23361e-09	2.89953e-07	NCYTHA	4
itf10g04110	Protein of unknown function, DUF642	Chr10	3572195	3577161	1013.02	2.44278	0.354481	6.88699	5.69842e-12	1.44874e-09	NCYTHA	4
itf10g04710	inositol transporter	Chr10	4335275	4342064	791.465	-2.64876	0.361791	-7.33174	2.27178e-13	1.02396e-10	NCYTHA	4
itf10g04760	endoplasmic reticulum oxidoreductins	Chr10	4408771	4413110	554.598	2.53028	0.44833	5.62744	1.82899e-08	7.51754e-07	NCYTHA	4
itf10g04870	Early-responsive to dehydration stress protein (ERD4)	Chr10	4578109	4583192	4127.65	-2.37805	0.445685	-5.33933	9.32884e-08	2.70471e-06	NCYTHA	4
itf10g05150	multidrug resistance-associated protein	Chr10	4925488	4944114	329.446	-2.11131	0.533283	-3.97407	7.06549e-05	0.000524693	NCYTHA	4
itf10g05700	fatty acid hydroxylase	Chr10	5647938	5652774	177.415	2.29627	0.500378	4.56208	5.06491e-06	6.30871e-05	NCYTHA	4
itf10g06830	zinc transporter 10 precursor	Chr10	7125217	7129647	209.556	-4.1372	0.79129	-5.60319	2.1044e-08	8.39016e-07	NCYTHA	4
itf10g06860	FKBP-like peptidyl-prolyl cis-trans isomerase family protein	Chr10	7196724	7199954	7.6503	3.13408	0.578337	4.85205	1.22191e-06	2.06052e-05	NCYTHA	4
itf10g07720	purple acid phosphatase	Chr10	8489830	8494506	50.706	2.41338	0.461993	5.17702	2.25461e-07	5.51582e-06	NCYTHA	4
itf10g07810	hypothetical protein	Chr10	8598776	8599912	12.8818	-2.29004	0.648382	-3.46892	0.000522563	0.00263541	NCYTHA	4
itf10g08390	serine-rich protein-related	Chr10	9338694	9339746	383.204	2.77181	0.454767	6.09523	1.09281e-09	8.64917e-08	NCYTHA	4
itf10g09750	galacturonosyltransferase-like	Chr10	11572177	11573831	46.9673	3.13662	0.537338	5.76971	7.94064e-09	4.0222e-07	NCYTHA	4
itf10g10260	receptor kinase	Chr10	12510414	12510977	12.175	2.03259	0.477673	4.18161	2.89448e-05	0.000255469	NCYTHA	4
itf10g10420	EamA-like transporter family protein	Chr10	12703830	12709379	83.0987	2.07013	0.355134	5.815	6.06325e-09	3.25738e-07	NCYTHA	4
itf10g10830	nodulin MtN21 /EamA-like transporter family protein	Chr10	13229991	13232788	29.7817	-3.64574	0.778975	-4.60214	4.18171e-06	5.42459e-05	NCYTHA	4
itf10g10860	Cupredoxin superfamily protein	Chr10	13280162	13282093	239.221	-2.14986	0.553904	-3.86262	0.000112179	0.000761984	NCYTHA	4
itf10g10920	Trypsin and protease inhibitor domain containing protein	Chr10	13341871	13343227	38699	4.52491	0.673546	6.98108	2.92917e-12	8.28674e-10	NCYTHA	4
itf10g11390	nuclear factor Y, subunit B4	Chr10	13849218	13849608	20.7657	-2.94169	0.710212	-4.10933	3.9681e-05	0.000329145	NCYTHA	4
itf10g11400	nuclear factor Y, subunit B5	Chr10	13860341	13860710	18.3405	-2.93742	0.728548	-4.01925	5.83834e-05	0.000449635	NCYTHA	4
itf10g11480	soybean gene regulated by cold-2	Chr10	13946482	13947422	43.7223	-2.09039	0.470717	-4.44647	8.72926e-06	9.71007e-05	NCYTHA	4
itf10g12210	Protein kinase family protein	Chr10	14787070	14787607	451.199	-4.73795	0.720747	-6.63402	3.26673e-11	6.07497e-09	NCYTHA	4
itf10g12610	Subtilisin-like serine endopeptidase family protein	Chr10	15191640	15195161	30.125	2.72644	0.445642	6.04276	1.51498e-09	1.09776e-07	NCYTHA	4
itf10g12680	Subtilisin-like serine endopeptidase family protein	Chr10	15224983	15232620	30.7321	2.36652	0.416921	5.62424	1.86325e-08	7.59961e-07	NCYTHA	4
itf10g12770	basic region/leucine zipper motif	Chr10	15388408	15388843	183.975	-2.1321	0.387902	-5.50266	3.74107e-08	1.3105e-06	NCYTHA	4
itf10g13010	Protein of unknown function, DUF538	Chr10	15596474	15597661	8.12057	2.03461	0.616483	3.1907	0.0014193	0.00588363	NCYTHA	4
itf10g13540	S-adenosyl-L-methionine-dependent methyltransferases superfamily protein	Chr10	16197648	16201920	116.098	3.19561	0.518896	6.11698	9.53647e-10	7.92511e-08	NCYTHA	4
itf10g13610	conserved hypothetical protein	Chr10	16257643	16258781	44.6142	2.29131	0.34543	6.60203	4.05552e-11	7.09529e-09	NCYTHA	4
itf10g13670	receptor-like kinase	Chr10	16343040	16346130	29.4118	2.0021	0.481499	4.13586	3.53634e-05	0.000300934	NCYTHA	4
itf10g13940	Stress up-regulated Nod 19 domain containing protein	Chr10	16632069	16635597	2195.6	-2.55925	0.453111	-5.66738	1.44994e-08	6.25851e-07	NCYTHA	4
itf10g15560	cation/H+ exchanger	Chr10	18019539	18022411	25.7324	-2.76603	0.710701	-3.91065	9.20489e-05	0.000651026	NCYTHA	4
itf10g15680	O-acetylserine (thiol) lyase B	Chr10	18157015	18162469	114.842	4.67	0.676616	6.74386	1.54229e-11	3.3537e-09	NCYTHA	4
itf10g15690	CCT motif family protein	Chr10	18187967	18193570	117.872	4.07618	0.787413	4.44251	8.89169e-06	9.862e-05	NCYTHA	4
itf10g16080	glycosyl hydrolase 9C2	Chr10	18460541	18466313	337.091	2.17696	0.576471	3.72596	0.000194573	0.00118239	NCYTHA	4
itf10g16210	Calcium-binding EF-hand family protein	Chr10	18557086	18559727	312.206	-3.86587	0.679066	-5.72855	1.01294e-08	4.81881e-07	NCYTHA	4
itf10g16250	3-ketoacyl-acyl carrier protein synthase I	Chr10	18580992	18584983	26.9721	-4.25611	0.623257	-6.43756	1.21412e-10	1.65211e-08	NCYTHA	4
itf10g16300	Tetratricopeptide repeat (TPR)-like superfamily protein	Chr10	18636576	18639432	3.36743	2.19555	0.676411	3.00745	0.00263448	0.00968733	NCYTHA	4
itf10g16380	Aluminium activated malate transporter family protein	Chr10	18753555	18755566	94.3439	-2.98487	0.792983	-4.64145	3.45965e-06	4.68921e-05	NCYTHA	4
itf10g16540	NAC (No Apical Meristem) domain transcriptional regulator superfamily protein	Chr10	18865647	18868073	16.6941	2.40866	0.681235	3.51508	0.000439623	0.0022874	NCYTHA	4
itf10g16980	UDP-Glycosyltransferase superfamily protein	Chr10	19212571	19214213	156.788	-3.76464	0.505567	-7.43544	1.04224e-13	6.02529e-11	NCYTHA	4
itf10g17030	VQ motif-containing protein	Chr10	19249601	19250259	75.3111	-3.92086	0.703405	-5.70628	1.15471e-08	5.3684e-07	NCYTHA	4
itf10g17050	hypothetical protein	Chr10	19272167	19272857	128.166	-3.86625	0.633197	-6.15149	7.67572e-10	6.71449e-08	NCYTHA	4
itf10g17260	cinnamyl alcohol dehydrogenase	Chr10	19477432	19479882	212.415	-2.68152	0.52474	-5.12819	2.92537e-07	6.68337e-06	NCYTHA	4
itf10g17470	WRKY DNA-binding protein	Chr10	19615723	19619338	4.27282	-2.90016	0.751993	-3.70857	0.000208431	0.00125205	NCYTHA	4
itf10g18000	Metallo-hydrolase/oxidoreductase superfamily protein	Chr10	20004566	20008899	104.871	2.0058	0.424829	4.70501	2.53858e-06	3.67493e-05
itf10g18060	glutathione S-transferase TAU	Chr10	20051551	20052661	41.5914	-3.81475	0.657473	-5.66373	1.48117e-08	6.35302e-07
itf10g18530	Protein of unknown function, DUF584	Chr10	20326509	20327350	438.108	-2.67184	0.440278	-6.09818	1.07285e-09	8.542e-08
itf10g18630	NOD26-like intrinsic protein 1;2	Chr10	20439767	20441752	308.946	-2.13103	0.604223	-3.48125	0.000499084	0.0025343
itf10g19070	hypothetical protein	Chr10	20907826	20909377	11096.6	-3.18837	0.711709	-4.83625	1.32315e-06	2.19778e-05
itf10g19280	Protein of unknown function (DUF640)	Chr10	21190206	21190758	461.808	2.60507	0.402194	6.4656	1.00895e-10	1.43481e-08
itf10g19630	Peroxidase superfamily protein	Chr10	21437218	21439674	14.7975	2.7956	0.563999	4.81514	1.47096e-06	2.38519e-05
itf10g19970	Pollen Ole e 1 allergen and extensin family protein	Chr10	21699702	21700870	46.0901	2.03889	0.508631	3.99026	6.6001e-05	0.000495669
itf10g20060	conserved hypothetical protein	Chr10	21771499	21772404	114.569	-2.12643	0.638472	-3.37035	0.000750717	0.00351847	NONC	6
itf10g20410	beta-galactosidase	Chr10	22012358	22018185	42.9713	3.84997	0.624424	6.04049	1.53651e-09	1.11034e-07	NONC_TNR	6_7
itf10g20870	Sulfite exporter TauE/SafE family protein	Chr10	22279817	22281529	11.5178	-2.35143	0.634521	-3.63691	0.000275926	0.00157462	NONC_TNR	6_7
itf10g20890	conserved hypothetical protein	Chr10	22289906	22291806	62.112	-2.3723	0.448053	-5.29096	1.21676e-07	3.37056e-06	NONC_TNR	6_7
itf10g21350	STRUBBELIG-receptor family	Chr10	22535738	22540221	246.033	2.06717	0.504688	4.07741	4.55409e-05	0.000366436	NONC_TNR	6_7
itf10g21420	Transducin/WD40 repeat-like superfamily protein	Chr10	22589040	22596695	384.261	-2.8681	0.506104	-5.70241	1.18123e-08	5.42528e-07	NONC_TNR	6_7
itf10g21620	acyl-CoA sterol acyl transferase	Chr10	22672459	22673539	5.15372	2.33194	0.635163	3.49721	0.000470148	0.00241306	NONC_TNR	6_7
itf10g21740	Major facilitator superfamily protein	Chr10	22740542	22745364	39.0724	-2.38837	0.571549	-4.17622	2.96391e-05	0.000261164	NONC_TNR	6_7
itf10g22450	Vacuolar iron transporter (VIT) family protein	Chr10	23170367	23171487	5.05319	-3.77886	0.686619	-4.79424	1.63292e-06	2.60025e-05	NONC_TNR	6_7
itf10g22610	2-oxoglutarate (2OG) and Fe(II)-dependent oxygenase superfamily protein	Chr10	23260448	23262574	31.5651	-2.88665	0.761824	-4.01804	5.86838e-05	0.000451303	NONC_TNR	6_7
itf10g22640	Peroxidase superfamily protein	Chr10	23272370	23274000	45.0368	-3.96519	0.75153	-5.19471	2.05045e-07	5.10557e-06	TNR	7
itf10g22840	white-brown complex homolog protein	Chr10	23368888	23372761	22.8781	2.40962	0.508786	4.65688	3.21032e-06	4.43261e-05	TNR	7
itf10g22900	2-oxoglutarate (2OG) and Fe(II)-dependent oxygenase superfamily protein	Chr10	23388523	23393888	77.8655	-2.7759	0.514625	-5.39498	6.85314e-08	2.12408e-06	TNR	7
itf10g23260	hypothetical protein	Chr10	23516540	23516828	33.7574	-2.46733	0.438838	-5.5733	2.49958e-08	9.5368e-07	TNR	7
itf10g23370	Concanavalin A-like lectin protein kinase family protein	Chr10	23564269	23566231	115.771	2.60213	0.506671	5.08146	3.74545e-07	8.13085e-06	TNR	7
itf10g23550	pathogenesis-related gene	Chr10	23647629	23648082	43.4489	-3.18333	0.808504	-4.09747	4.17686e-05	0.000343036	TNR	7
itf10g24090	UDP-glucosyl transferase 73B3	Chr10	23896651	23898103	14.7088	-2.09967	0.678559	-3.06944	0.00214462	0.00820957	TNR	7
itf10g24100	UDP-glucosyltransferase 73B2	Chr10	23900141	23901649	69.7089	-2.52803	0.551586	-4.57417	4.78122e-06	6.03876e-05	TNR	7
itf10g24420	Peroxidase superfamily protein	Chr10	24032026	24033357	204.344	-2.65572	0.735981	-3.65851	0.000253687	0.0014738	TNR	7
itf10g24520	hypothetical protein	Chr10	24072591	24073127	18.9962	2.50363	0.490956	5.02192	5.11563e-07	1.03847e-05	TNR	7
itf10g24550	Transducin/WD40 repeat-like superfamily protein	Chr10	24084699	24086425	69.6036	-2.22016	0.707651	-3.50151	0.000462638	0.0023834	TNR	7
itf10g24600	cold-regulated 413-plasma membrane	Chr10	24114784	24116903	664.89	-2.18411	0.5261	-4.16513	3.1117e-05	0.000271043	TNR	7
itf10g24660	DUF4228 domain containing protein	Chr10	24135110	24135668	11.0971	2.15908	0.670729	3.10118	0.00192753	0.00754027	TNR	7
itf10g25260	NAD(P)-linked oxidoreductase superfamily protein	Chr10	24458848	24460558	7.94622	2.11013	0.664241	3.12391	0.00178466	0.00708562
itf10g25530	Pathogenesis-related thaumatin superfamily protein	Chr10	24586208	24587823	75.3215	2.6583	0.511115	5.14665	2.65181e-07	6.21866e-06
itf10g25660	mechanosensitive channel of small conductance-like	Chr10	24657757	24661560	11.5054	-2.15985	0.547734	-3.85678	0.000114891	0.000776443
itf11g00090	Transducin/WD40 repeat-like superfamily protein	Chr11	53822	61398	108.955	2.09466	0.481822	4.33798	1.43797e-05	0.000144958
itf11g00260	Probable membrane-associated kinase regulator	Chr11	150504	151793	6.67076	-2.80166	0.787488	-3.34836	0.000812906	0.00375827
itf11g00460	plasma membrane intrinsic protein 1;5	Chr11	233572	235491	701.934	2.51584	0.49913	5.04213	4.60387e-07	9.54253e-06
itf11g00710	xylem serine peptidase	Chr11	345966	349314	262.974	2.25341	0.485075	4.64474	3.40501e-06	4.62696e-05
itf11g00900	related to AP2	Chr11	426441	427490	14.7565	-2.42734	0.74996	-3.33231	0.000861298	0.00393751
itf11g00930	S-adenosyl-L-methionine-dependent methyltransferases superfamily protein	Chr11	436038	439643	140.97	2.58367	0.395458	6.51486	7.27586e-11	1.1315e-08
itf11g01010	FASCICLIN-like arabinogalactan-protein	Chr11	458834	460512	319.419	2.35365	0.396524	5.92606	3.10292e-09	1.91009e-07
itf11g01470	ethylene-responsive element binding factor	Chr11	707214	707772	3.9439	-4.12748	0.719831	-5.15742	2.50378e-07	5.95555e-06
itf11g01480	ethylene-responsive element binding factor	Chr11	710870	711665	9.11402	-3.74267	0.766111	-4.50471	6.64625e-06	7.81296e-05
itf11g01510	alpha/beta-Hydrolases superfamily protein	Chr11	731009	732520	15.6128	-2.07807	0.464322	-4.42202	9.77839e-06	0.000106094
itf11g01600	cyclin p4;1	Chr11	812260	814438	102.025	2.49782	0.429133	5.80026	6.62127e-09	3.47297e-07
itf11g01730	DNA replication helicase, putative	Chr11	881587	892036	23.3042	2.71713	0.507598	5.25752	1.46012e-07	3.86358e-06
itf11g01840	Phototropic-responsive NPH3 family protein	Chr11	933193	935469	14.83	-2.1627	0.533626	-4.00296	6.25556e-05	0.000474755
itf11g02010	Protein of unknown function, DUF642	Chr11	1002904	1005613	933.98	2.41787	0.396947	6.07635	1.22947e-09	9.36834e-08
itf11g02190	FAD-binding Berberine family protein	Chr11	1082323	1085451	862.41	-2.7865	0.393037	-7.10566	1.1975e-12	3.7526e-10
itf11g02200	FAD-binding Berberine family protein	Chr11	1087178	1090668	122.161	-2.90234	0.428819	-6.75601	1.41848e-11	3.16989e-09
itf11g02340	Auxin efflux carrier family protein	Chr11	1167737	1170626	68.0572	-4.19849	0.698199	-6.02468	1.69446e-09	1.19209e-07
itf11g02690	Ypt/Rab-GAP domain of gyp1p superfamily protein	Chr11	1378081	1385938	15.0333	2.55364	0.458172	5.45864	4.79786e-08	1.60692e-06
itf11g02920	FASCICLIN-like arabinogalactan-protein	Chr11	1488472	1489412	66.1974	2.14192	0.591793	3.64025	0.00027237	0.00155967
itf11g03010	rhamnose biosynthesis	Chr11	1522667	1526093	99.6115	2.12568	0.544738	3.86471	0.000111222	0.000756644
itf11g03360	ADP glucose pyrophosphorylase	Chr11	1732804	1736700	4861.92	3.79922	0.551269	6.89996	5.20184e-12	1.3527e-09
itf11g03680	Protein kinase superfamily protein	Chr11	1944983	1948282	149.526	2.49555	0.406788	6.12273	9.19857e-10	7.71664e-08
itf11g03980	Basic-leucine zipper (bZIP) transcription factor family protein	Chr11	2058326	2062371	35.805	2.93372	0.599671	4.75201	2.01407e-06	3.07247e-05
itf11g04060	C2H2-like zinc finger protein	Chr11	2099190	2101842	35.4711	-2.80006	0.541125	-5.1309	2.88361e-07	6.61808e-06
itf11g04090	DNAJ heat shock family protein	Chr11	2119745	2124003	9.63048	2.05124	0.631603	3.19771	0.00138524	0.00577123
itf11g04600	conserved hypothetical protein	Chr11	2377523	2377866	64.7578	2.46892	0.462273	5.32745	9.96019e-08	2.84316e-06
itf11g05010	myb domain protein	Chr11	2617602	2618911	18.8464	-3.38166	0.746806	-4.9833	6.25096e-07	1.22409e-05
itf11g05040	myb domain protein	Chr11	2635816	2636959	15.5662	-2.29803	0.701379	-3.20023	0.0013732	0.00572733
itf11g05050	myb domain protein	Chr11	2642109	2643446	296.708	-3.14445	0.715903	-4.46992	7.82481e-06	8.86979e-05
itf11g05060	myb domain protein	Chr11	2651456	2651822	97.1995	-2.14954	0.552646	-3.75686	0.000172058	0.0010708
itf11g05530	S-locus lectin protein kinase family protein	Chr11	2865772	2867591	12.2787	-2.13391	0.485094	-4.31305	1.61018e-05	0.000158652
itf11g05600	WRKY family transcription factor	Chr11	2917360	2920408	16.0661	-2.30386	0.582811	-3.87631	0.000106053	0.000728378
itf11g05880	Phototropic-responsive NPH3 family protein	Chr11	3063208	3065694	29.4041	2.10269	0.403978	5.17036	2.33641e-07	5.64838e-06
itf11g05940	Cwf15 / Cwc15 cell cycle control family protein	Chr11	3097533	3098208	11.253	-2.27737	0.423316	-5.21468	1.84133e-07	4.70833e-06
itf11g06190	conserved hypothetical protein	Chr11	3226188	3227550	1322.5	-2.66542	0.428143	-6.2573	3.91703e-10	3.88992e-08
itf11g06770	IQ-domain	Chr11	3592190	3594027	45.1177	-2.25537	0.44819	-5.01409	5.32852e-07	1.07431e-05
itf11g06800	RNA-binding (RRM/RBD/RNP motifs) family protein	Chr11	3607460	3609927	70.3963	4.30976	0.717974	5.52424	3.30922e-08	1.18997e-06
itf11g06960	plasma membrane intrinsic protein 2;5	Chr11	3741625	3743867	70.8043	2.19319	0.546504	3.97175	7.13475e-05	0.000528361
itf11g07260	Zinc finger (C3HC4-type RING finger) family protein	Chr11	3929493	3932032	87.2598	2.24517	0.45335	4.94289	7.69719e-07	1.44658e-05
itf11g07390	Transmembrane amino acid transporter family protein	Chr11	3987162	3987998	23.098	-3.25035	0.53695	-5.64666	1.63591e-08	6.89443e-07
itf11g07400	Transmembrane amino acid transporter family protein	Chr11	3988286	3991668	48.1687	-3.3086	0.564903	-5.81379	6.1073e-09	3.2636e-07
itf11g07490	ACT-like superfamily protein	Chr11	4062687	4066447	27.5543	2.32862	0.487914	4.72487	2.30263e-06	3.41325e-05
itf11g07550	Pectin lyase-like superfamily protein	Chr11	4108602	4113739	190.176	2.6704	0.444859	5.96952	2.37946e-09	1.55472e-07
itf11g07560	Shugoshin C terminus	Chr11	4118878	4121769	27.3595	2.33559	0.370006	6.25717	3.9202e-10	3.88992e-08
itf11g07570	Protein of unknown function (DUF1635)	Chr11	4137458	4139230	100.229	3.19282	0.488138	6.48828	8.68211e-11	1.26859e-08
itf11g07810	Thioredoxin superfamily protein	Chr11	4300211	4302170	10.9662	3.33304	0.732191	4.24008	2.23437e-05	0.000207467
itf11g08160	Glucose-methanol-choline (GMC) oxidoreductase family protein	Chr11	4561058	4563127	105.319	2.08837	0.392875	5.30322	1.13776e-07	3.18633e-06
itf11g08580	Cytochrome P450 superfamily protein	Chr11	4860862	4862622	153.745	-2.05455	0.566278	-3.63724	0.000275578	0.00157398
itf11g09120	HAD superfamily, subfamily IIIB acid phosphatase	Chr11	5246974	5248596	151.268	2.31161	0.511435	4.51881	6.21868e-06	7.41918e-05
itf11g09270	Protein of unknown function (DUF1677)	Chr11	5428839	5429974	10.965	4.74739	0.68627	5.90217	3.58751e-09	2.14388e-07
itf11g09290	conserved hypothetical protein	Chr11	5437917	5439423	137.771	3.06093	0.533377	5.6775	1.36675e-08	5.99767e-07
itf11g09480	RAD3-like DNA-binding helicase protein	Chr11	5533292	5537638	14.544	2.2283	0.527711	4.15665	3.22944e-05	0.000279105
itf11g09630	2-oxoglutarate (2OG) and Fe(II)-dependent oxygenase superfamily protein	Chr11	5689912	5692484	490.548	-2.73403	0.789387	-3.89977	9.62837e-05	0.000674697
itf11g09710	HCO3- transporter family	Chr11	5729420	5733499	72.1394	-3.56305	0.709593	-5.12674	2.94803e-07	6.72934e-06
itf11g10210	Plant protein of unknown function (DUF247)	Chr11	6001139	6002840	61.0209	-2.85537	0.641139	-4.47511	7.63724e-06	8.69422e-05	NOCR	7
itf11g10220	Plant protein of unknown function (DUF247)	Chr11	6008494	6010529	258.062	-2.55984	0.426156	-6.0115	1.83811e-09	1.27294e-07	NOCR	7
itf11g10390	Eukaryotic aspartyl protease family protein	Chr11	6157021	6159413	73.11	2.71857	0.589281	4.5535	5.27602e-06	6.51068e-05	NOCR	7
itf11g10520	DNA glycosylase superfamily protein	Chr11	6246296	6250037	26.0403	2.18083	0.393256	5.502	3.75514e-08	1.3105e-06	NOCR	7
itf11g10700	Stress up-regulated Nod 19 domain containing protein	Chr11	6434627	6437928	17.031	3.00657	0.69744	4.22556	2.38342e-05	0.000219316	NOCR	7
itf11g10790	Sec14p-like phosphatidylinositol transfer family protein	Chr11	6485863	6491908	46.6848	-2.35799	0.579613	-4.04882	5.14761e-05	0.000405241	NOCR	7
itf11g10960	jasmonate-zim-domain protein	Chr11	6681822	6685614	88.3339	2.56447	0.510775	5.01931	5.18579e-07	1.04951e-05	NOCR	7
itf11g11060	Pathogenesis-related thaumatin superfamily protein	Chr11	6766070	6768371	249.676	2.67298	0.421576	6.31462	2.70835e-10	2.91592e-08	NOCR	7
itf11g11130	conserved hypothetical protein	Chr11	6849235	6852404	107.55	2.10579	0.370974	5.65831	1.52873e-08	6.50454e-07	NOCR	7
itf11g11140	transducin family protein / WD-40 repeat family protein	Chr11	6853110	6857478	14.4631	2.67748	0.503172	5.19574	2.03912e-07	5.08689e-06	NOCR	7
itf11g11620	homeobox protein	Chr11	7351231	7351918	27.4592	2.15808	0.610433	3.52698	0.000420336	0.00220834	NOCR	7
itf11g12490	Adenine nucleotide alpha hydrolases-like superfamily protein	Chr11	8236978	8238437	17.4358	3.34079	0.520233	6.19783	5.72479e-10	5.2678e-08	NOCR	7
itf11g12790	transporter associated with antigen processing protein	Chr11	8448979	8454201	990.059	-2.38921	0.451613	-5.28283	1.27206e-07	3.491e-06	NOCR	7
itf11g12830	transporter associated with antigen processing protein	Chr11	8471217	8475945	28.4658	-3.90996	0.741399	-5.20138	1.97811e-07	4.97913e-06	NOCR	7
itf11g13430	Protein of unknown function, DUF538	Chr11	9217649	9219309	5.48445	3.42124	0.770806	3.88507	0.000102301	0.00070809	NOCR	7
itf11g13660	Protein of unknown function (DUF1637)	Chr11	9471576	9476304	64.2601	2.0056	0.532971	3.74018	0.000183888	0.00112943	NOCR	7
itf11g13790	hypothetical protein	Chr11	9667813	9668209	3.00752	2.0752	0.579909	3.30454	0.000951335	0.00426985	NOCR	7
itf11g14600	chromomethylase	Chr11	10716473	10721366	93.3625	2.03901	0.413673	4.90409	9.38608e-07	1.69568e-05	NOCR	7
itf11g15030	Leucine-rich repeat (LRR) family protein	Chr11	11346973	11349194	96.3846	3.21847	0.499227	6.37766	1.79813e-10	2.15394e-08	NOCR	7
itf11g15670	DC1 domain-containing protein	Chr11	12170279	12173575	173.058	-2.03625	0.342871	-5.94043	2.84283e-09	1.77881e-07	NOCR	7
itf11g15920	GRAM domain-containing protein / ABA-responsive protein-related	Chr11	12428431	12429297	4.32265	-2.10762	0.638402	-3.05811	0.00222739	0.0084667	NOCR	7
itf11g16970	Kunitz family trypsin and protease inhibitor protein	Chr11	13899365	13899962	13.5535	2.24043	0.543165	4.01646	5.90777e-05	0.000453407	NOCR	7
itf11g17040	Kunitz family trypsin and protease inhibitor protein	Chr11	13985895	13987694	10.9222	3.43344	0.695306	4.20077	2.66007e-05	0.000239207	NOCR	7
itf11g18510	translocon-associated protein beta (TRAPB) family protein	Chr11	15817930	15821057	5.43394	-2.25681	0.680461	-3.14039	0.00168723	0.00676546	NOCR	7
itf11g19560	Leucine-rich repeat protein kinase family protein	Chr11	16951900	16953376	55.848	-2.2479	0.533748	-4.21373	2.51193e-05	0.000229001
itf11g19920	conserved hypothetical protein	Chr11	17250205	17250919	12.0524	2.59233	0.580151	4.35587	1.32542e-05	0.000135774
itf11g20020	Copper amine oxidase family protein	Chr11	17343089	17352971	87.4038	2.56075	0.406755	6.28235	3.3349e-10	3.4374e-08
itf11g20440	NB-ARC domain-containing disease resistance protein	Chr11	17768093	17771927	39.1223	-2.12534	0.400373	-5.27972	1.29378e-07	3.52516e-06
itf11g20690	similar to RCD one	Chr11	18037186	18040474	1354.95	-2.42765	0.51066	-4.74168	2.11958e-06	3.20261e-05
itf11g20700	similar to RCD one	Chr11	18044095	18047401	303.137	-2.12011	0.485278	-4.3641	1.27645e-05	0.00013162
itf11g20990	putative recombination initiation defect	Chr11	18260014	18264627	8.73316	3.41343	0.589568	5.37783	7.53907e-08	2.27826e-06
itf11g21270	AAA-ATPase	Chr11	18538405	18539809	78.0413	2.08821	0.430059	4.84364	1.27481e-06	2.13348e-05
itf11g21460	cytochrome p450 78a9	Chr11	18680858	18683392	884.268	-2.62851	0.378562	-6.94438	3.80135e-12	1.04216e-09
itf12g00280	P-loop containing nucleoside triphosphate hydrolases superfamily protein	Chr12	222457	224286	65.7916	4.27197	0.733578	5.4512	5.00316e-08	1.65278e-06
itf12g00410	Protein kinase superfamily protein	Chr12	288167	290122	94.1167	-3.17909	0.628854	-5.1363	2.80195e-07	6.49626e-06
itf12g00590	conserved hypothetical protein	Chr12	376980	377698	29.6103	2.65639	0.571981	4.53227	5.83525e-06	7.06634e-05
itf12g00620	hypothetical protein	Chr12	396539	400014	100.923	-2.96301	0.798715	-4.29398	1.75495e-05	0.000170016
itf12g00680	DNAJ-like	Chr12	424619	425120	95.2183	-3.96163	0.647821	-6.16425	7.08185e-10	6.38399e-08
itf12g00710	Pollen Ole e 1 allergen and extensin family protein	Chr12	444361	445847	47.2211	3.6711	0.654491	5.55304	2.80743e-08	1.04271e-06
itf12g00820	tetratricopeptide repeat (TPR)-containing protein	Chr12	498223	502142	28.7981	2.53011	0.517355	4.81613	1.46372e-06	2.3749e-05
itf12g01140	basic helix-loop-helix (bHLH) DNA-binding superfamily protein	Chr12	710318	712134	35.8648	2.4873	0.538231	4.58228	4.59943e-06	5.85228e-05
itf12g01490	O-Glycosyl hydrolases family 17 protein	Chr12	871193	874951	92.8871	2.25479	0.461753	4.85864	1.18197e-06	2.0123e-05
itf12g01560	nudix hydrolase homolog	Chr12	902349	904736	29.9493	-2.33812	0.67168	-3.4687	0.000522989	0.00263634
itf12g01660	Homeodomain-like superfamily protein	Chr12	991414	995802	32.7934	2.22078	0.614374	3.55597	0.000376591	0.00202276
itf12g01960	acyl activating enzyme	Chr12	1164152	1166168	742.846	-2.49195	0.3268	-7.62449	2.45008e-14	1.86157e-11
itf12g02970	Dehydrin domain containing protein	Chr12	1825113	1826340	5502.99	-3.0656	0.617732	-5.38539	7.22863e-08	2.21196e-06
itf12g03720	cytochrome P450, family 735, subfamily A, polypeptide	Chr12	2229108	2229702	102.261	-2.49121	0.547616	-4.5596	5.12522e-06	6.37488e-05
itf12g03870	hypothetical protein	Chr12	2327934	2328958	145.662	-2.36379	0.415658	-5.67127	1.41745e-08	6.15919e-07
itf12g04340	Homeobox-leucine zipper protein family	Chr12	2581412	2582884	28.961	-3.79383	0.665609	-5.04473	4.5416e-07	9.45332e-06
itf12g04390	squalene epoxidase	Chr12	2642256	2645621	60.4252	4.30594	0.596332	7.00217	2.52023e-12	7.36488e-10
itf12g04670	hypothetical protein	Chr12	2807188	2807458	3.03745	2.31229	0.668943	3.18594	0.00144285	0.00596265
itf12g05080	Remorin family protein	Chr12	3088467	3092467	220.911	2.22034	0.439949	5.02796	4.95726e-07	1.01406e-05
itf12g05310	NAD(P)-binding Rossmann-fold superfamily protein	Chr12	3236044	3239231	11.2588	-3.18827	0.657357	-4.61425	3.94514e-06	5.18858e-05
itf12g05420	methyl esterase	Chr12	3325970	3328774	70.6399	2.30673	0.579577	3.95256	7.7318e-05	0.000564093
itf12g05580	TCP domain protein	Chr12	3446136	3447088	2.27244	2.43723	0.780255	3.22033	0.00128041	0.00541076
itf12g05820	myb domain protein	Chr12	3596459	3597765	138.393	-4.84751	0.655273	-7.41448	1.22106e-13	6.62688e-11
itf12g05900	hypothetical protein	Chr12	3658915	3659570	8.51614	3.55595	0.663878	4.87635	1.08069e-06	1.88327e-05
itf12g06530	NAC domain containing protein	Chr12	4003894	4005774	656.116	-2.59677	0.400722	-6.47571	9.43689e-11	1.34922e-08
itf12g06670	NAC (No Apical Meristem) domain transcriptional regulator superfamily protein	Chr12	4116206	4117916	15.1904	-2.78381	0.667506	-4.03415	5.48004e-05	0.000426737
itf12g07250	Transducin/WD40 repeat-like superfamily protein	Chr12	4495961	4499671	58.8982	3.1096	0.527616	5.77841	7.54118e-09	3.86402e-07
itf12g07260	cysteine-rich RLK (RECEPTOR-like protein kinase)	Chr12	4503396	4507680	84.6215	-2.15206	0.450924	-4.76253	1.91179e-06	2.94384e-05
itf12g07310	Pectin lyase-like superfamily protein	Chr12	4536492	4538675	1391.09	-3.67356	0.57407	-6.50228	7.91136e-11	1.18551e-08
itf12g07520	Pectin lyase-like superfamily protein	Chr12	4680725	4683551	127.051	2.17819	0.35669	6.09361	1.10393e-09	8.68544e-08
itf12g07690	conserved hypothetical protein	Chr12	4788352	4789115	5.55433	2.17936	0.614837	3.40216	0.000668566	0.00319942
itf12g07890	PQQ-like domain containing protein	Chr12	4994885	4997908	62.6926	-3.85036	0.783266	-5.13749	2.78437e-07	6.46679e-06
itf12g08020	Major facilitator superfamily protein	Chr12	5110788	5113745	2.42631	2.77618	0.797275	3.26664	0.00108832	0.00475544
itf12g08350	myb domain protein	Chr12	5335010	5335744	13.2949	-2.17493	0.598898	-3.4508	0.000558931	0.0027815
itf12g08560	Endonuclease/exonuclease/phosphatase family protein	Chr12	5456600	5463077	6.15603	2.24371	0.606384	3.54336	0.000395057	0.00210283
itf12g08610	PHYTOCYSTATIN	Chr12	5493177	5493651	92.1278	-2.52269	0.518236	-4.86029	1.17214e-06	1.99812e-05
itf12g09290	ribonuclease	Chr12	6036123	6037725	293.449	2.17223	0.527974	4.10146	4.10552e-05	0.000338222
itf12g09300	Seven transmembrane MLO family protein	Chr12	6038263	6044453	15.119	-3.8464	0.701939	-5.01992	5.16924e-07	1.04776e-05
itf12g09420	NAD(P)-binding Rossmann-fold superfamily protein	Chr12	6198859	6200027	20.0951	-2.76535	0.646537	-4.16658	3.09205e-05	0.000270082
itf12g09630	NAD(P)-binding Rossmann-fold superfamily protein	Chr12	6382327	6383526	32.5366	-4.7882	0.74662	-6.04497	1.49442e-09	1.08583e-07
itf12g09750	receptor lectin kinase	Chr12	6450636	6452686	234.267	-2.03417	0.400348	-5.08503	3.67576e-07	8.00568e-06
itf12g09900	rubisco activase	Chr12	6536055	6540548	76.6965	-2.73518	0.494453	-5.5249	3.29675e-08	1.18795e-06
itf12g09910	NAD(P)-binding Rossmann-fold superfamily protein	Chr12	6545393	6546600	76.2953	-3.74339	0.651839	-5.64921	1.61188e-08	6.81476e-07
itf12g09960	NAD(P)-binding Rossmann-fold superfamily protein	Chr12	6591651	6593124	10.6333	-2.88918	0.771734	-3.55602	0.00037651	0.00202273
itf12g10070	Major facilitator superfamily protein	Chr12	6679245	6683167	873.582	2.36308	0.612851	3.84054	0.000122765	0.00081938
itf12g10330	Reticulon family protein	Chr12	6935542	6937766	225.071	2.10564	0.294095	7.15277	8.5045e-13	2.93714e-10
itf12g11180	APRATAXIN-like	Chr12	8064689	8065443	9.45565	2.33123	0.691978	3.23449	0.00121859	0.00520974
itf12g11350	Protein of unknown function (DUF567)	Chr12	8277037	8279500	3.87463	-2.9412	0.663056	-3.97993	6.89358e-05	0.000513504
itf12g11380	PYRIMIDINE	Chr12	8304885	8309598	1215.55	-3.46178	0.606195	-5.86836	4.40114e-09	2.55187e-07
itf12g11400	Transcription factor bHLH61	Chr12	8376909	8380406	5.29934	3.37514	0.806882	3.49101	0.000481194	0.00246037
itf12g11630	lipid transfer protein	Chr12	8697478	8698862	62.35	-3.7018	0.726503	-5.14043	2.74108e-07	6.3887e-06
itf12g11860	WUSCHEL related homeobox	Chr12	8874863	8875520	5.94991	-2.65173	0.661598	-3.77229	0.000161756	0.00101885
itf12g11930	Protein of unknown function (DUF1191)	Chr12	8977891	8979871	31.5182	3.3532	0.538833	6.09826	1.07232e-09	8.542e-08
itf12g12700	phytochrome kinase substrate	Chr12	9815332	9817277	41.296	2.4203	0.456959	5.26179	1.42657e-07	3.78987e-06
itf12g12850	Tryptophan/tyrosine permease	Chr12	10001959	10003647	35.255	-2.66662	0.622366	-4.25313	2.10807e-05	0.000197952
itf12g12890	expansin A15	Chr12	10061943	10064317	15.7751	-3.49453	0.709384	-4.6403	3.47905e-06	4.70353e-05
itf12g14530	LOB domain-containing protein	Chr12	12398901	12400612	5.2762	2.17169	0.527028	3.94209	8.07747e-05	0.000584979
itf12g14730	Tetratricopeptide repeat (TPR)-like superfamily protein	Chr12	12924103	12924996	6.53211	-2.06924	0.592769	-3.32492	0.000884427	0.00401975
itf12g14830	allergen-related	Chr12	13063802	13065584	6.47641	3.75463	0.792806	4.43166	9.3512e-06	0.000102462
itf12g14840	conserved hypothetical protein	Chr12	13095366	13096638	467.881	-2.24103	0.361769	-6.20976	5.30671e-10	4.91712e-08
itf12g15130	Glycosyl hydrolase superfamily protein	Chr12	13592645	13594930	350.643	2.77333	0.555611	4.92887	8.27081e-07	1.52528e-05
itf12g15180	GroES-like zinc-binding dehydrogenase family protein	Chr12	13690723	13696681	1017.14	-2.22941	0.498804	-4.47204	7.74751e-06	8.8033e-05
itf12g15390	glycosyl hydrolase 9B13	Chr12	13962967	13966065	33.265	4.72727	0.761026	5.43386	5.51489e-08	1.77982e-06
itf12g15530	Nucleoside transporter family protein	Chr12	14279752	14282271	13.6162	3.28092	0.69013	4.55028	5.35757e-06	6.58687e-05
itf12g15610	Leucine-rich repeat transmembrane protein kinase	Chr12	14450633	14454479	54.4214	-2.78229	0.659629	-4.22922	2.34504e-05	0.000216233
itf12g16800	early nodulin-like protein	Chr12	16309208	16310177	166.451	2.89277	0.567381	5.02127	5.13315e-07	1.04123e-05
itf12g17690	conserved hypothetical protein	Chr12	17190870	17191605	273.839	2.34423	0.517483	4.53107	5.86859e-06	7.09057e-05
itf12g17830	Pectin lyase-like superfamily protein	Chr12	17336304	17341147	34.34	2.8702	0.537391	5.26602	1.39409e-07	3.71501e-06
itf12g17940	conserved hypothetical protein	Chr12	17409578	17411121	185.315	-2.07757	0.439062	-4.72055	2.35213e-06	3.46731e-05
itf12g18030	TRICHOME BIREFRINGENCE-LIKE	Chr12	17466934	17470421	79.811	3.28864	0.457372	7.14417	9.05416e-13	3.06713e-10
itf12g18120	ferric reduction oxidase	Chr12	17575220	17577887	35.6529	-2.11833	0.447309	-4.72769	2.27085e-06	3.38235e-05
itf12g18290	Leucine-rich repeat protein kinase family protein	Chr12	17794705	17797841	47.5953	2.61631	0.490747	5.29993	1.15848e-07	3.23607e-06
itf12g18750	Protein of unknown function (DUF567)	Chr12	18112113	18113553	30.9118	-2.55698	0.582557	-4.39314	1.11723e-05	0.000118116
itf12g18820	1-aminocyclopropane-1-carboxylic acid (acc) synthase	Chr12	18186137	18188378	238.614	-2.70801	0.548873	-4.95113	7.3784e-07	1.39919e-05
itf12g18830	1-aminocyclopropane-1-carboxylic acid (acc) synthase	Chr12	18199070	18201216	355.115	-2.87463	0.585129	-4.8984	9.6619e-07	1.7279e-05
itf12g18840	1-aminocyclopropane-1-carboxylic acid (acc) synthase	Chr12	18209578	18211959	704.907	-2.78936	0.546527	-5.12188	3.02499e-07	6.86379e-06
itf12g18850	Heavy metal transport/detoxification superfamily protein	Chr12	18214919	18216292	752.122	-2.06702	0.4687	-4.41997	9.87148e-06	0.000106843
itf12g19190	aldehyde dehydrogenase 2C4	Chr12	18580886	18587267	281.053	-2.17637	0.563468	-3.83908	0.000123495	0.000822055
itf12g19240	Heavy metal transport/detoxification superfamily protein	Chr12	18638658	18640250	12.1268	2.90744	0.571707	4.91197	9.01643e-07	1.64229e-05
itf12g20580	hydroxyproline-rich glycoprotein family protein	Chr12	19813212	19815076	80.0208	-2.70066	0.430865	-6.25311	4.02366e-10	3.97774e-08
itf12g21010	pleiotropic drug resistance	Chr12	20115422	20122344	2.78754	-3.44795	0.705654	-4.14017	3.47044e-05	0.000296465
itf12g21050	Peroxidase superfamily protein	Chr12	20142782	20146894	13.593	-3.50799	0.646144	-5.15476	2.53951e-07	6.01557e-06
itf12g21060	Peroxidase superfamily protein	Chr12	20152184	20153798	8.09132	-3.2938	0.616453	-5.00777	5.50647e-07	1.10349e-05
itf12g21160	Major facilitator superfamily protein	Chr12	20201508	20205837	63.576	2.55753	0.471301	5.38183	7.37343e-08	2.2435e-06
itf12g21900	Protein of unknown function (DUF640)	Chr12	20709838	20710524	81.4199	3.50803	0.544836	6.37113	1.87644e-10	2.19825e-08
itf12g22090	ABC-2 type transporter family protein	Chr12	20850535	20852704	17.6379	2.43199	0.530201	4.49578	6.93138e-06	8.08448e-05	NONC	7
itf12g22500	conserved hypothetical protein	Chr12	21059415	21060301	17.5022	-2.46995	0.582064	-4.11612	3.85307e-05	0.000321509	NONC	7
itf12g22510	conserved hypothetical protein	Chr12	21064770	21066098	9.83162	-2.32382	0.659221	-3.44946	0.000561706	0.00279242	NONC	7
itf12g22560	ENTH/VHS family protein	Chr12	21080119	21081395	233.112	-2.75731	0.508099	-5.43319	5.53561e-08	1.78178e-06	NONC	7
itf12g22590	expansin A4	Chr12	21093415	21099186	67.2384	2.54723	0.49236	5.119	3.07164e-07	6.94091e-06	NONC	7
itf12g23120	Polyketide cyclase/dehydrase and lipid transport superfamily protein	Chr12	21399982	21400501	2.46098	3.18448	0.748645	3.54055	0.000399291	0.00212155	NONC	7
itf12g23170	HXXXD-type acyl-transferase family protein	Chr12	21434647	21436081	82.9537	-3.496	0.623433	-5.58828	2.29328e-08	8.94212e-07	NONC	7
itf12g23230	plasma membrane intrinsic protein 1;4	Chr12	21466165	21468409	2722.72	-2.64958	0.594313	-4.43373	9.26176e-06	0.000101776	NONC	7
itf12g23380	Phosphoinositide-specific phospholipase C family protein	Chr12	21564638	21569832	200.327	-2.62456	0.503892	-5.19606	2.03559e-07	5.08673e-06	NONC	7
itf12g23570	LOB domain-containing protein	Chr12	21745715	21746525	3.40812	3.46287	0.787981	4.177	2.95382e-05	0.000260361	NONC	7
itf12g23920	E2F target gene	Chr12	21933982	21938565	127.201	2.93375	0.47872	6.0688	1.28866e-09	9.64492e-08	NONC	7
itf12g23960	Basic-leucine zipper (bZIP) transcription factor family protein	Chr12	21952448	21955360	44.6419	2.39771	0.394264	6.03402	1.59926e-09	1.14019e-07	NONC	7
itf12g24140	cytochrome P450, family 714, subfamily A, polypeptide	Chr12	22043254	22047604	484.816	-2.89467	0.453345	-6.40312	1.52236e-10	1.90066e-08	NONC	7
itf12g24650	Plant invertase/pectin methylesterase inhibitor superfamily protein	Chr12	22334386	22335243	20.8341	3.55007	0.629896	5.4041	6.51363e-08	2.03068e-06
itf12g24900	Protein kinase superfamily protein	Chr12	22495544	22496929	4.40825	-2.11066	0.623532	-3.21325	0.00131242	0.00551796
itf12g25420	cytochrome P450, family 715, subfamily A, polypeptide	Chr12	22855588	22859052	20.8652	-2.6678	0.522183	-5.02296	5.08814e-07	1.03526e-05
itf12g25670	NAD(P)-binding Rossmann-fold superfamily protein	Chr12	23013027	23014008	58.8399	-2.82342	0.493483	-5.68345	1.32008e-08	5.88021e-07
itf12g25710	ABC-2 type transporter family protein	Chr12	23035421	23037505	69.6577	3.15055	0.606383	5.08768	3.62461e-07	7.90724e-06
itf12g25770	timeless family protein	Chr12	23075917	23083576	47.9935	2.36731	0.455384	5.14862	2.62413e-07	6.17007e-06
itf12g25930	sigma factor E	Chr12	23169589	23173424	9.18651	-2.65397	0.685266	-3.72509	0.000195244	0.00118512
itf12g25940	Nodulin MtN3 family protein	Chr12	23179603	23181318	76.5021	-3.92367	0.717935	-5.70073	1.19298e-08	5.4698e-07
itf12g25990	Haloacid dehalogenase-like hydrolase (HAD) superfamily protein	Chr12	23206311	23208406	15.6703	2.4607	0.600528	3.93076	8.46791e-05	0.000608614
itf12g26650	Heavy metal transport/detoxification superfamily protein	Chr12	23519101	23520366	5.05291	-3.3886	0.743694	-4.52369	6.07711e-06	7.29109e-05
itf12g26730	Protein of unknown function, DUF599	Chr12	23557533	23558550	23.2295	-2.37202	0.418708	-5.58739	2.30508e-08	8.97496e-07
itf12g27150	Peroxidase superfamily protein	Chr12	23749250	23750974	929.798	-3.19643	0.480627	-6.66796	2.59377e-11	5.07177e-09
itf12g27280	SNF1-related protein kinase 2.5	Chr12	23806834	23810487	51.6727	2.73719	0.69317	3.72154	0.000198013	0.0011984
itf12g27330	topoisomerase 3alpha	Chr12	23827056	23837246	24.2247	2.81908	0.474986	5.84922	4.93881e-09	2.78258e-07
itf12g27590	conserved hypothetical protein	Chr12	23959126	23959689	94.2628	-3.85391	0.529256	-7.20282	5.89811e-13	2.18046e-10
itf12g27610	cell wall / vacuolar inhibitor of fructosidase	Chr12	23965321	23966294	43.0536	2.27975	0.516959	4.35054	1.35801e-05	0.000138579
itf12g27680	3-ketoacyl-CoA synthase	Chr12	24002809	24004755	146.736	-4.59078	0.624065	-7.11609	1.11029e-12	3.55734e-10
itf13g00160	conserved hypothetical protein	Chr13	94954	95958	38.5337	-2.05712	0.484417	-4.2127	2.52338e-05	0.000229731
itf13g00250	cytochrome P450, family 82, subfamily C, polypeptide	Chr13	164214	165853	92.3707	-3.49084	0.607587	-5.76011	8.40613e-09	4.22579e-07
itf13g00290	cytochrome P450, family 82, subfamily C, polypeptide	Chr13	182383	183118	1.88452	-2.52084	0.760101	-3.37073	0.000749703	0.00351629
itf13g00310	cytochrome P450, family 82, subfamily C, polypeptide	Chr13	184802	186603	2.40852	-3.04317	0.699524	-3.87867	0.000105031	0.000723599
itf13g00390	hypothetical protein	Chr13	278396	278708	19.8557	-4.33083	0.77762	-4.87467	1.0899e-06	1.89684e-05
itf13g00430	hypothetical protein	Chr13	308724	309024	2935.37	-4.84836	0.748355	-6.72023	1.81434e-11	3.76943e-09
itf13g00620	DNA glycosylase superfamily protein	Chr13	433557	436867	6.49782	2.38512	0.629593	3.62293	0.000291286	0.00164602
itf13g00750	alpha/beta-Hydrolases superfamily protein	Chr13	542796	546791	192.483	-4.01996	0.523032	-7.71892	1.17322e-14	1.03998e-11
itf13g01050	receptor like protein	Chr13	806276	809075	73.2763	-2.46325	0.552893	-4.42776	9.5215e-06	0.000103923
itf13g01070	Plant protein of unknown function (DUF247)	Chr13	819843	821403	6.30228	-3.59335	0.776711	-4.62904	3.67357e-06	4.90664e-05
itf13g01780	Cupredoxin superfamily protein	Chr13	1351450	1353035	358.007	-2.71508	0.576472	-4.7115	2.45895e-06	3.57991e-05
itf13g01850	Tetratricopeptide repeat (TPR)-like superfamily protein	Chr13	1417673	1419513	2005.44	2.60122	0.502699	5.16629	2.38785e-07	5.7466e-06
itf13g01880	glutathione S-transferase TAU	Chr13	1451617	1453245	216.183	-3.04166	0.628684	-4.85294	1.21642e-06	2.05385e-05
itf13g02010	Major facilitator superfamily protein	Chr13	1556215	1562097	174.741	-3.20446	0.582192	-5.66328	1.48506e-08	6.35946e-07
itf13g02170	Cytochrome P450 superfamily protein	Chr13	1715593	1718958	48.7183	-3.20585	0.759298	-4.25177	2.12089e-05	0.000198805
itf13g02300	aspartate-glutamate racemase family	Chr13	1870025	1871981	193.383	2.03148	0.448496	4.52485	6.0438e-06	7.26581e-05
itf13g02430	NADPH:quinone oxidoreductase	Chr13	1954627	1955511	438.098	-3.19484	0.528056	-6.06804	1.29479e-09	9.64492e-08
itf13g03310	osmotin	Chr13	2783769	2784450	107.386	-2.08098	0.684023	-3.25335	0.00114051	0.00492964	FYTHA	5
itf13g03780	AGAMOUS-like	Chr13	3364546	3376287	71.2699	-3.61924	0.735226	-5.01206	5.38513e-07	1.08338e-05	FYTHA	5
itf13g04310	MATE efflux family protein	Chr13	3893277	3894887	69.9609	-2.44571	0.596069	-4.07834	4.53591e-05	0.000365659	FYTHA_TNR	5_8
itf13g05060	Kunitz family trypsin and protease inhibitor protein	Chr13	4896775	4897422	23.1676	3.25313	0.696406	4.39242	1.12095e-05	0.000118338	FYTHA_TNR_NONC	5_8_8
itf13g05950	nitrate transporter 1.5	Chr13	6642007	6643255	47.1005	-2.0482	0.624059	-3.26222	0.00110544	0.00481286	FYTHA_TNR_NONC	5_8_8
itf13g05960	nitrate transporter 1.5	Chr13	6644245	6650430	1265.17	-2.33734	0.561025	-4.14967	3.32954e-05	0.000286141	FYTHA_TNR_NONC	5_8_8
itf13g07030	hypothetical protein	Chr13	8232943	8234196	17.5581	2.94172	0.529089	5.43295	5.54314e-08	1.78178e-06	FYTHA_TNR_NONC	5_8_8
itf13g07100	Protein kinase superfamily protein	Chr13	8327843	8333821	40.5723	2.54482	0.464529	5.42433	5.81724e-08	1.84384e-06	FYTHA_TNR_NONC	5_8_8
itf13g07510	Protein kinase superfamily protein	Chr13	8911094	8915521	266.532	-3.7166	0.605522	-6.18932	6.04243e-10	5.48418e-08	FYTHA_TNR_NONC	5_8_8
itf13g07900	Nucleotide-diphospho-sugar transferases superfamily protein	Chr13	9399997	9407041	16.5119	-2.64169	0.738621	-3.65571	0.00025647	0.00148526	FYTHA_TNR_NONC	5_8_8
itf13g08920	ethylene responsive element binding factor	Chr13	10752683	10753571	23.1036	-3.41944	0.677217	-4.95273	7.31785e-07	1.39201e-05	FYTHA_TNR_NONC	5_8_8
itf13g09220	nudix hydrolase homolog	Chr13	11272736	11276594	232.59	-2.2238	0.47231	-4.71409	2.42792e-06	3.54756e-05	FYTHA_TNR_NONC	5_8_8
itf13g09270	hypothetical protein	Chr13	11363351	11370291	3.1157	2.43792	0.660672	3.29389	0.000988118	0.00440151	FYTHA_TNR_NONC	5_8_8
itf13g09940	ATP binding cassette subfamily B19	Chr13	12301378	12311941	4.65954	-2.61482	0.68364	-3.40415	0.00066371	0.00318076	FYTHA_TNR_NONC	5_8_8
itf13g10100	early-responsive to dehydration stress protein (ERD4)	Chr13	12495598	12501021	67.5857	2.27384	0.446764	5.0715	3.94692e-07	8.47823e-06	FYTHA_TNR_NONC	5_8_8
itf13g10860	pinoresinol reductase	Chr13	13279424	13281832	10.9172	2.53166	0.720532	3.06166	0.00220114	0.00838608	TNR_NONC	8_8
itf13g11500	Adaptin family protein	Chr13	14008661	14019209	43.3623	2.72094	0.469361	5.7422	9.34533e-09	4.56001e-07	TNR_NONC	8_8
itf13g11670	Leucine-rich repeat protein kinase family protein	Chr13	14171788	14174821	5.51411	2.04864	0.623967	3.0928	0.00198277	0.00770087	TNR_NONC	8_8
itf13g11710	alternative oxidase 1D	Chr13	14205794	14208309	52.8537	-3.29361	0.678794	-4.7308	2.23639e-06	3.34438e-05	TNR_NONC	8_8
itf13g11850	S-adenosyl-L-methionine-dependent methyltransferases superfamily protein	Chr13	14337723	14341898	72.5164	2.05055	0.426223	4.78796	1.68482e-06	2.66534e-05	TNR_NONC	8_8
itf13g12150	beta-galactosidase	Chr13	14644647	14652515	18.0369	2.45724	0.555857	4.31323	1.60883e-05	0.000158652	TNR_NONC	8_8
itf13g12280	natural resistance associated macrophage protein	Chr13	14754640	14761342	95.9665	-4.42765	0.787888	-5.82321	5.77276e-09	3.1458e-07	TNR_NONC	8_8
itf13g12600	H(+)-ATPase	Chr13	15105670	15113422	1471.35	-4.02686	0.700041	-5.86235	4.56373e-09	2.60997e-07	TNR_NONC	8_8
itf13g12860	conserved hypothetical protein	Chr13	15339496	15340221	41.7212	-2.48966	0.475814	-5.20072	1.98519e-07	4.9804e-06	TNR_NONC	8_8
itf13g12960	UDP-glucosyltransferase 75B1	Chr13	15411822	15413205	82.1308	-3.29026	0.530336	-6.09304	1.10784e-09	8.69049e-08	TNR_NONC	8_8
itf13g12970	UDP-Glycosyltransferase superfamily protein	Chr13	15418205	15419869	521.926	-2.49788	0.40834	-6.14234	8.13134e-10	7.04354e-08	TNR_NONC	8_8
itf13g13940	glutathione S-transferase TAU	Chr13	16297596	16298527	9.54673	-2.87643	0.81086	-4.0057	6.18341e-05	0.000470488	TNR_NONC_RYTHA	8_8_2
itf13g14040	myb domain protein	Chr13	16338224	16340615	595.737	-3.27913	0.484595	-6.81414	9.48306e-12	2.23171e-09	TNR_NONC_RYTHA	8_8_2
itf13g14110	plasmodesmata-located protein	Chr13	16391393	16393477	75.5086	2.9347	0.476098	6.10338	1.03851e-09	8.34352e-08	TNR_NONC_RYTHA	8_8_2
itf13g14160	Plant protein of unknown function domain containing protein	Chr13	16448751	16451064	14.6418	-2.86641	0.669105	-4.16862	3.06446e-05	0.000268246	TNR_NONC_RYTHA	8_8_2
itf13g14780	Plastid-lipid associated protein PAP / fibrillin family protein	Chr13	17192354	17195280	100.582	2.09041	0.351007	5.94538	2.75823e-09	1.73814e-07	TNR_NONC_RYTHA	8_8_2
itf13g15070	Helicase protein with RING/U-box domain	Chr13	17416354	17421523	50.3249	2.51521	0.491954	5.0452	4.53058e-07	9.44802e-06	TNR_RYTHA	8_2
itf13g15580	Integrase-type DNA-binding superfamily protein	Chr13	17971531	17972317	92.0602	2.47813	0.46552	5.27687	1.31408e-07	3.56011e-06	TNR_RYTHA	8_2
itf13g15600	chlorophyllase	Chr13	18008750	18010242	81.855	2.56806	0.500836	5.12198	3.02342e-07	6.86379e-06	TNR_RYTHA	8_2
itf13g15710	sucrose-proton symporter	Chr13	18126140	18127988	2.96859	-2.49078	0.677063	-3.13796	0.00170128	0.00681049	TNR_RYTHA	8_2
itf13g15720	sucrose-proton symporter	Chr13	18130719	18132498	1.81647	-3.01844	0.713237	-3.38232	0.000718754	0.00339922	TNR_RYTHA	8_2
itf13g15980	gamma histone variant H2AX	Chr13	18372639	18373905	173.785	2.46792	0.375507	6.55301	5.63871e-11	9.1994e-09	TNR_RYTHA	8_2
itf13g16280	Disease resistance protein (TIR-NBS-LRR class)	Chr13	18603611	18605959	23.4689	3.42703	0.775768	4.38251	1.1732e-05	0.000122879	TNR_RYTHA	8_2
itf13g16360	beta-amylase	Chr13	18655270	18657810	20065.1	3.94768	0.786163	5.50201	3.75483e-08	1.3105e-06	TNR_RYTHA	8_2
itf13g16450	minichromosome maintenance (MCM2/3/5) family protein	Chr13	18706946	18713021	233.935	2.2643	0.405351	5.56263	2.65737e-08	1.00237e-06	TNR_RYTHA	8_2
itf13g16550	high affinity K+ transporter	Chr13	18749638	18750649	8.51546	-3.12314	0.807701	-3.57312	0.000352748	0.00192029	TNR_RYTHA	8_2
itf13g16560	high affinity K+ transporter	Chr13	18751828	18754457	10.5756	-3.32043	0.791579	-3.92324	8.73648e-05	0.00062583	TNR_RYTHA	8_2
itf13g16930	somatic embryogenesis receptor-like kinase	Chr13	19058299	19060115	35.7819	-2.20845	0.658205	-3.41056	0.000648285	0.0031209	RYTHA	2
itf13g17000	senescence-associated gene	Chr13	19113288	19115090	76.3277	3.91216	0.744087	4.94018	7.80523e-07	1.46172e-05	RYTHA	2
itf13g17040	SAUR-like auxin-responsive protein family	Chr13	19147532	19147955	34.9181	-2.79476	0.6398	-4.39338	1.116e-05	0.000118069	RYTHA	2
itf13g18340	hypothetical protein	Chr13	20113893	20114160	59.188	-2.21959	0.617627	-3.59589	0.00032329	0.00179062	RYTHA	2
itf13g18380	hypothetical protein	Chr13	20127639	20128023	46.4231	-3.28173	0.675066	-4.95788	7.12648e-07	1.36538e-05	RYTHA	2
itf13g18390	hypothetical protein	Chr13	20131676	20132051	5.21461	-2.43693	0.762378	-3.07212	0.00212545	0.00815504	RYTHA	2
itf13g18480	alpha/beta-Hydrolases superfamily protein	Chr13	20168296	20178065	4.53069	2.07362	0.597467	3.24348	0.0011808	0.00507613	RYTHA	2
itf13g18530	alpha/beta-Hydrolases superfamily protein	Chr13	20191125	20192586	589.125	-2.02515	0.340373	-5.9504	2.67483e-09	1.69766e-07	RYTHA	2
itf13g18560	conserved hypothetical protein	Chr13	20211921	20213656	73.7623	3.7414	0.5856	6.22372	4.85497e-10	4.56213e-08	RYTHA	2
itf13g18750	purple acid phosphatase	Chr13	20318493	20322225	267.164	-2.95189	0.524145	-5.64301	1.67098e-08	7.00888e-07	RYTHA	2
itf13g18930	basic helix-loop-helix (bHLH) DNA-binding superfamily protein	Chr13	20423515	20428098	3.50109	-2.41562	0.803532	-3.24969	0.0011553	0.00498264	RYTHA	2
itf13g19010	vesicle associated protein	Chr13	20492742	20497510	84.5894	2.06887	0.417293	4.93651	7.95322e-07	1.48362e-05	RYTHA	2
itf13g19120	conserved hypothetical protein	Chr13	20548001	20549186	81.4792	2.55494	0.381897	6.66968	2.56357e-11	5.04985e-09	RYTHA	2
itf13g19600	NPK1-related protein kinase	Chr13	20832828	20838392	71.8938	2.19865	0.425084	5.1459	2.66235e-07	6.23788e-06
itf13g20090	sulfate transporter 3;1	Chr13	21089976	21095370	859.022	-2.40118	0.491112	-4.89257	9.95297e-07	1.77075e-05
itf13g20100	IQ-domain	Chr13	21102677	21105305	14.3236	-2.60642	0.572462	-4.45088	8.55195e-06	9.55956e-05
itf13g20580	CBL-interacting protein kinase	Chr13	21355868	21357557	2.38909	3.18549	0.79617	3.77635	0.000159143	0.00100501
itf13g20650	alpha/beta-Hydrolases superfamily protein	Chr13	21409015	21410704	5.64371	-2.42373	0.735282	-3.1154	0.00183693	0.00725383
itf13g20850	UDP-Glycosyltransferase superfamily protein	Chr13	21518974	21520318	35.6987	-3.61922	0.630231	-5.62329	1.8736e-08	7.6301e-07
itf13g20860	cellulose synthase like G1	Chr13	21524724	21529388	431.113	-4.00461	0.709985	-6.03538	1.58591e-09	1.13371e-07
itf13g20870	zinc-finger protein	Chr13	21534525	21535203	6.19834	-2.47269	0.774105	-3.35119	0.000804658	0.00372792
itf13g21010	ethylene response factor	Chr13	21627632	21628422	17.8675	-2.41102	0.727436	-3.41346	0.00064144	0.00309692
itf13g21040	phosphate transporter 1;5	Chr13	21643825	21646135	14.7429	-2.69495	0.746706	-3.60571	0.000311306	0.00173664
itf13g21100	glutathione S-transferase TAU	Chr13	21681772	21683615	126.819	-2.85489	0.57945	-4.88211	1.04956e-06	1.84352e-05
itf13g21250	Mannose-binding lectin superfamily protein	Chr13	21814633	21816891	1163.46	2.68155	0.524683	5.13536	2.81605e-07	6.51193e-06
itf13g21260	Mannose-binding lectin superfamily protein	Chr13	21820192	21822943	56.0179	2.34945	0.761212	3.01813	0.00254337	0.00942396
itf13g21330	Mannose-binding lectin superfamily protein	Chr13	21853041	21856072	462.76	-4.32494	0.761702	-5.5831	2.36274e-08	9.10009e-07
itf13g21340	Mannose-binding lectin superfamily protein	Chr13	21856961	21858519	9.04175	-3.85921	0.786468	-4.60011	4.22275e-06	5.46721e-05
itf13g21350	Protein of unknown function (DUF810)	Chr13	21859271	21865222	3.33099	2.3657	0.636079	3.42781	0.000608469	0.00297008
itf13g21600	myb domain protein	Chr13	21997041	21998322	558.895	-2.69552	0.448981	-6.02662	1.67429e-09	1.18102e-07
itf13g21620	ABI five binding protein	Chr13	22008910	22012426	337.6	-2.16041	0.312562	-6.91597	4.64686e-12	1.2235e-09
itf13g21710	conserved hypothetical protein	Chr13	22057094	22058575	133.912	2.13449	0.442726	4.80874	1.51885e-06	2.44497e-05
itf13g22710	hypothetical protein	Chr13	22768908	22769274	14.4974	-2.34301	0.561176	-4.09685	4.18806e-05	0.000343619
itf13g22730	Ribosomal protein PSRP-3/Ycf65	Chr13	22777048	22778254	13.5691	2.07374	0.548333	3.7323	0.000189738	0.00115807
itf14g00660	glycosyl hydrolase 9B1	Chr14	487150	492483	61.5003	2.75179	0.548378	4.94986	7.4268e-07	1.4037e-05
itf14g00980	Heavy metal transport/detoxification superfamily protein	Chr14	772598	774843	149.9	-2.59988	0.536937	-4.87253	1.10178e-06	1.91375e-05
itf14g01210	origin recognition complex subunit	Chr14	938128	939744	7.26782	2.15181	0.563384	3.70927	0.000207862	0.00124942
itf14g01470	Cotton fibre expressed protein domain containing protein	Chr14	1166426	1167239	3.19213	2.41493	0.711621	3.09132	0.00199268	0.00773258
itf14g02140	Transmembrane amino acid transporter family protein	Chr14	1808088	1813262	21.6879	2.94582	0.706953	4.15049	3.31762e-05	0.000285335
itf14g02210	Eukaryotic aspartyl protease family protein	Chr14	1913725	1915319	63.8043	3.73796	0.6007	6.07635	1.22948e-09	9.36834e-08
itf14g02470	DHHC-type zinc finger family protein	Chr14	2141955	2146866	228.926	2.11944	0.330219	6.4096	1.45903e-10	1.85645e-08
itf14g03110	Glycosyl transferase, family	Chr14	2640348	2647968	92.694	3.90973	0.655687	6.06978	1.28083e-09	9.64492e-08
itf14g03360	NAD(P)-linked oxidoreductase superfamily protein	Chr14	2790147	2790471	4.18812	-2.84454	0.624962	-3.86072	0.000113056	0.000767156
itf14g03370	NAD(P)-linked oxidoreductase superfamily protein	Chr14	2791432	2794898	173.806	-3.75252	0.418512	-8.92739	4.36195e-19	1.49179e-15
itf14g03380	NAD(P)-linked oxidoreductase superfamily protein	Chr14	2799481	2801882	23.3786	-2.10402	0.476082	-4.38458	1.16212e-05	0.000122103
itf14g04080	hypothetical protein	Chr14	3410063	3412287	10.4918	2.38661	0.437495	5.3296	9.8427e-08	2.81751e-06
itf14g04570	UDP-glucosyl transferase 76E12	Chr14	3712227	3713631	16.1518	-3.49295	0.668105	-4.49346	7.00747e-06	8.14821e-05
itf14g04600	Protein kinase superfamily protein	Chr14	3723635	3726043	9.51926	-2.9049	0.580799	-4.55845	5.15321e-06	6.39773e-05
itf14g04890	Pectin lyase-like superfamily protein	Chr14	3906593	3909995	173.885	4.91814	0.773221	5.56827	2.57282e-08	9.78056e-07
itf14g05210	Phototropic-responsive NPH3 family protein	Chr14	4153605	4156755	75.4916	2.58255	0.567805	4.53062	5.88101e-06	7.09913e-05
itf14g06500	GDSL-like Lipase/Acylhydrolase superfamily protein	Chr14	5176742	5180822	10.3169	3.36186	0.773878	3.86963	0.000108999	0.000744951
itf14g06590	flowering promoting factor	Chr14	5271559	5271883	10.5505	-2.24065	0.8076	-3.59136	0.000328956	0.00181605
itf14g06630	conserved hypothetical protein	Chr14	5306676	5309715	6.78847	2.16509	0.580831	3.60847	0.000308014	0.00172174
itf14g07230	related to AP2	Chr14	5782861	5783602	3.03992	-2.41974	0.77549	-3.12463	0.00178026	0.00707324
itf14g07330	curculin-like (mannose-binding) lectin family protein / PAN domain-containing protein	Chr14	5900597	5905571	20.3467	2.13042	0.477501	4.40237	1.07073e-05	0.000114353
itf14g07730	Bifunctional inhibitor/lipid-transfer protein/seed storage 2S albumin superfamily protein	Chr14	6278605	6280530	248.384	2.86235	0.532995	5.27642	1.31732e-07	3.56011e-06
itf14g08320	Transducin/WD40 repeat-like superfamily protein	Chr14	6851376	6857146	22.5359	2.51094	0.508981	4.87403	1.09344e-06	1.90176e-05	TNR	9
itf14g08330	2-oxoglutarate (2OG) and Fe(II)-dependent oxygenase superfamily protein	Chr14	6857475	6858750	17.1842	-2.73439	0.809566	-3.12347	0.00178733	0.00709411	TNR	9
itf14g08340	LOB domain-containing protein	Chr14	6873400	6877796	249.318	2.96125	0.525493	5.61527	1.96257e-08	7.89135e-07	TNR	9
itf14g08380	conserved hypothetical protein	Chr14	6938017	6942960	11.3384	2.05766	0.497678	4.0613	4.88007e-05	0.000387621	TNR	9
itf14g08390	basic helix-loop-helix (bHLH) DNA-binding superfamily protein	Chr14	6954440	6957744	546.622	-2.06807	0.280429	-7.37985	1.58463e-13	7.95095e-11	TNR	9
itf14g08620	hypothetical protein	Chr14	7254809	7255374	62.4216	-2.33948	0.300549	-7.75529	8.81445e-15	9.01549e-12	TNR	9
itf14g08740	Minichromosome maintenance (MCM2/3/5) family protein	Chr14	7369619	7374617	170.342	2.54749	0.411462	6.15952	7.29669e-10	6.48966e-08	TNR	9
itf14g09100	alpha/beta-Hydrolases superfamily protein	Chr14	7723926	7725887	58.9232	-2.22161	0.56019	-3.96788	7.2514e-05	0.000534724	TNR	9
itf14g10160	Plant L-ascorbate oxidase	Chr14	8947331	8954502	66.8855	-2.019	0.47706	-4.21434	2.50506e-05	0.000228454	TNR	9
itf14g10290	Argonaute family protein	Chr14	9165447	9174243	469.701	2.01297	0.345958	5.8272	5.63666e-09	3.09063e-07	TNR	9
itf14g13190	C-repeat/DRE binding factor	Chr14	13652754	13653820	24.393	-3.09233	0.702215	-4.31384	1.60445e-05	0.000158378	TNR	9
itf14g13300	cellulose synthase-like A02	Chr14	13761320	13767432	249.441	2.69409	0.472839	5.65851	1.52697e-08	6.50454e-07	TNR	9
itf14g13440	hydroxycinnamoyl-CoA shikimate/quinate hydroxycinnamoyl transferase	Chr14	13967826	13969349	62.7905	-2.09895	0.535888	-3.9076	9.32171e-05	0.000657365	TNR	9
itf14g14100	alpha carbonic anhydrase	Chr14	14883582	14888108	66.8327	-4.46901	0.600628	-6.5682	5.09284e-11	8.51786e-09	TNR	9
itf14g14540	Late embryogenesis abundant (LEA) protein-related	Chr14	15254534	15255897	27.6742	-2.30379	0.645141	-3.56959	0.000357536	0.00194034	TNR	9
itf14g14750	related to AP2.7	Chr14	15494600	15503607	117.744	-2.47483	0.437934	-5.65435	1.5644e-08	6.64572e-07	TNR	9
itf14g14760	related to AP2.7	Chr14	15497661	15499375	7.33392	-2.63565	0.625184	-3.88039	0.000104291	0.00071906	TNR	9
itf14g15370	ENTH/VHS family protein	Chr14	16038717	16040995	401.764	-2.24091	0.349093	-6.42479	1.32048e-10	1.71296e-08
itf14g15510	ROTUNDIFOLIA like	Chr14	16152309	16153146	5.63423	2.68119	0.762609	3.27471	0.0010577	0.00464533
itf14g16450	Major facilitator superfamily protein	Chr14	16798441	16800917	17.05	2.90872	0.571538	4.80285	1.56426e-06	2.50895e-05
itf14g16540	expansin A8	Chr14	16845460	16846947	83.2387	3.13756	0.518636	5.994	2.04744e-09	1.40691e-07
itf14g16690	Cystathionine beta-synthase (CBS) family protein	Chr14	16965408	16968251	1097.57	2.12497	0.23808	8.92424	4.48776e-19	1.49179e-15
itf14g16920	SKU5 similar	Chr14	17080344	17084898	238.046	2.35949	0.377881	6.2326	4.58758e-10	4.37267e-08
itf14g17250	cytochrome P450, family 82, subfamily C, polypeptide	Chr14	17294573	17297896	9.91864	-3.13608	0.737764	-4.20143	2.65232e-05	0.000238895
itf14g17280	ER lumen protein retaining receptor family protein	Chr14	17308640	17310857	62.7217	-2.0974	0.558299	-3.76133	0.00016901	0.00105579
itf14g17490	Pectin lyase-like superfamily protein	Chr14	17442229	17447780	69.9729	2.35798	0.463703	5.0664	4.05408e-07	8.63172e-06
itf14g17680	photosystem II reaction center PSB28 protein	Chr14	17571875	17574131	24.0163	3.91257	0.718213	5.08833	3.61221e-07	7.89315e-06
itf14g17990	Protein of unknown function (DUF640)	Chr14	17751411	17752756	67.2041	2.04522	0.651735	3.20462	0.0013524	0.00565747
itf14g18120	lateral organ boundaries-domain	Chr14	17831562	17833201	16.2264	-2.33638	0.586255	-3.93913	8.17766e-05	0.000591107
itf14g18350	histone H2A	Chr14	17989217	17991036	18.9083	2.08824	0.483173	4.2678	1.97414e-05	0.000187432
itf14g18490	cupin family protein	Chr14	18097634	18100601	9.68021	-3.36882	0.696517	-4.19119	2.77495e-05	0.000247632
itf14g18670	Cupredoxin superfamily protein	Chr14	18168870	18169999	3.98431	-2.30793	0.668733	-3.13702	0.00170673	0.00682616
itf14g18850	aluminum-activated, malate transporter	Chr14	18325079	18328652	76.5939	-3.13824	0.660807	-4.82164	1.42381e-06	2.32863e-05
itf14g19050	DNAse I-like superfamily protein	Chr14	18448225	18450193	62.9473	-3.47244	0.606953	-5.71332	1.10793e-08	5.169e-07
itf14g19080	Protein kinase family protein	Chr14	18465628	18469043	361.52	-3.24059	0.463513	-6.99624	2.62929e-12	7.60008e-10
itf14g19630	hypothetical protein	Chr14	18739662	18742162	31.7142	-2.49809	0.70615	-3.5758	0.000349156	0.00190308
itf14g19640	Integrase-type DNA-binding superfamily protein	Chr14	18743298	18744420	494.09	2.00489	0.490492	4.06142	4.87755e-05	0.000387621
itf14g19990	GRAS family transcription factor	Chr14	18893145	18894759	8.35448	-2.28647	0.670497	-3.35516	0.000793187	0.00368247
itf15g00120	serine carboxypeptidase-like	Chr15	45953	50216	74.3841	-2.3603	0.413895	-5.68632	1.29807e-08	5.83102e-07	RYTHA_CYTHA_CI	3_1_1
itf15g00430	methionine adenosyltransferase	Chr15	215181	217636	1084.12	2.6268	0.52181	4.99104	6.00543e-07	1.18298e-05	RYTHA_CYTHA_CI	3_1_1
itf15g00490	Pectin lyase-like superfamily protein	Chr15	246095	247395	18.536	4.02898	0.622671	6.1303	8.77135e-10	7.40497e-08	RYTHA_CYTHA_CI	3_1_1
itf15g00540	RAB GTPase homolog E1E	Chr15	270075	272328	127.38	-2.03751	0.477507	-4.26779	1.97419e-05	0.000187432	RYTHA_CYTHA_CI	3_1_1
itf15g00590	don-glucosyltransferase	Chr15	290732	292601	859.698	-2.54919	0.445343	-5.73137	9.96198e-09	4.77039e-07	RYTHA_CYTHA_CI	3_1_1
itf15g00630	2-oxoglutarate (2OG) and Fe(II)-dependent oxygenase superfamily protein	Chr15	314125	316992	11.3546	2.2773	0.605396	3.5848	0.000337331	0.00185076	RYTHA_CYTHA_CI	3_1_1
itf15g00700	poly(A) binding protein	Chr15	351343	355957	3.70395	3.21142	0.801173	3.29315	0.000990707	0.00440861	RYTHA_CYTHA_CI	3_1_1
itf15g00830	Exostosin family protein	Chr15	418361	421851	154.057	-2.90838	0.638264	-4.62281	3.78584e-06	5.02634e-05	RYTHA_CYTHA_CI	3_1_1
itf15g00860	sequence-specific DNA binding transcription factors	Chr15	432650	434577	658.884	2.59365	0.403831	6.40633	1.49062e-10	1.87868e-08	RYTHA_CYTHA_CI	3_1_1
itf15g00900	cytochrome P450, family 76, subfamily G, polypeptide	Chr15	461139	463665	45.6353	-2.05792	0.811217	-3.17957	0.00147493	0.00606787	RYTHA_CYTHA_CI	3_1_1
itf15g01100	Duplicated homeodomain-like superfamily protein	Chr15	570049	573024	265.577	3.09893	0.587909	5.26707	1.38616e-07	3.70473e-06	RYTHA_CYTHA_CI	3_1_1
itf15g02080	UDP-glucosyl transferase 78D2	Chr15	1193902	1196719	16.6799	2.68554	0.665221	3.74936	0.000177286	0.00109666	CYTHA_CI	1_1
itf15g02630	peroxidase	Chr15	1572637	1574632	224.278	2.61623	0.593504	4.23564	2.27906e-05	0.000210954	CYTHA_CI	1_1
itf15g02830	hypothetical protein	Chr15	1684298	1686987	15.8507	2.22433	0.57284	3.80597	0.000141248	0.000912363	CYTHA_CI	1_1
itf15g02920	squamosa promoter binding protein-like	Chr15	1744982	1747980	15.119	3.25589	0.705451	4.44605	8.74653e-06	9.72393e-05	CYTHA_CI	1_1
itf15g02970	bZIP transcription factor family protein	Chr15	1786207	1792686	214.393	-2.94229	0.505259	-5.82252	5.79679e-09	3.15244e-07	CYTHA_CI	1_1
itf15g03000	cytochrome P450, family 93, subfamily D, polypeptide	Chr15	1803759	1805005	62.8424	-3.67357	0.480786	-7.5236	5.32881e-14	3.45534e-11	CYTHA_CI	1_1
itf15g03120	conserved hypothetical protein	Chr15	1857597	1863351	428.172	2.06985	0.385076	5.36562	8.06696e-08	2.39692e-06	CYTHA_CI	1_1
itf15g03290	curculin-like (mannose-binding) lectin family protein / PAN domain-containing protein	Chr15	1936111	1939101	201.026	2.52739	0.410737	6.14019	8.24207e-10	7.09325e-08	CYTHA_CI	1_1
itf15g03300	nuclear factor Y, subunit A9	Chr15	1944388	1950828	229.59	-2.58127	0.408232	-6.33719	2.33987e-10	2.5872e-08	CYTHA_CI	1_1
itf15g03420	Leucine-rich repeat protein kinase family protein	Chr15	2013388	2017070	111.282	2.002	0.38221	5.22263	1.76396e-07	4.54104e-06	CYTHA_CI	1_1
itf15g03580	Protein of unknown function, DUF617	Chr15	2121205	2122382	679.983	-3.5998	0.513523	-7.07544	1.48979e-12	4.50206e-10	CYTHA_CI	1_1
itf15g03630	UDP-glycosyltransferase 73B4	Chr15	2153719	2155962	15.6307	3.36953	0.581543	5.6011	2.12993e-08	8.46081e-07	CYTHA_CI	1_1
itf15g03670	UDP-glucosyl transferase 73B3	Chr15	2168299	2169739	25.8124	3.02107	0.606692	4.83455	1.33447e-06	2.21469e-05	CYTHA_CI	1_1
itf15g03730	UDP-glycosyltransferase 73B4	Chr15	2183379	2185814	10.5103	2.22601	0.635927	3.40754	0.000655509	0.00315168	CYTHA_CI	1_1
itf15g04040	Gibberellin-regulated family protein	Chr15	2351111	2352578	82.9108	2.67838	0.698174	3.64553	0.000266839	0.00153329	NONC	9
itf15g04170	S-adenosyl-L-methionine-dependent methyltransferases superfamily protein	Chr15	2472867	2474565	96.9633	-3.16246	0.605603	-5.2467	1.54847e-07	4.06099e-06	NONC	9
itf15g04270	cytochrome p450 79a2	Chr15	2510228	2512222	24.6352	-2.69445	0.560943	-4.75582	1.97644e-06	3.02414e-05	NONC	9
itf15g04410	basic helix-loop-helix (bHLH) DNA-binding superfamily protein	Chr15	2598209	2600300	295.412	-3.33999	0.599249	-5.57621	2.45809e-08	9.40546e-07	NONC	9
itf15g04650	hypothetical protein	Chr15	2768930	2769929	43.4404	2.26322	0.473496	4.75818	1.95349e-06	2.99592e-05	NONC	9
itf15g04750	nodulin MtN21 /EamA-like transporter family protein	Chr15	2833671	2835923	73.4115	-2.71613	0.457213	-5.92001	3.21919e-09	1.95452e-07	NONC	9
itf15g04760	FKBP-type peptidyl-prolyl cis-trans isomerase family protein	Chr15	2838889	2842414	16.519	-3.19887	0.50665	-5.86691	4.43987e-09	2.56138e-07	NONC	9
itf15g05030	myb domain protein	Chr15	3003206	3005374	29.8362	3.61384	0.617769	5.67005	1.42758e-08	6.1931e-07	NONC	9
itf15g05420	Protein of unknown function (DUF1637)	Chr15	3245316	3248290	95.7377	3.24976	0.5002	6.43866	1.20529e-10	1.65211e-08	NONC	9
itf15g05610	Exostosin family protein	Chr15	3381285	3386544	6.23019	-2.89525	0.761306	-3.78674	0.000152639	0.000971782	NONC	9
itf15g06110	ovate family protein	Chr15	3732461	3733552	102.153	2.11744	0.43287	4.88509	1.03379e-06	1.82184e-05	NONC	9
itf15g06500	Tautomerase/MIF superfamily protein	Chr15	4086039	4087421	86.9212	-4.2682	0.589938	-7.18346	6.79704e-13	2.44262e-10	NONC	9
itf15g06510	Tautomerase/MIF superfamily protein	Chr15	4090690	4092193	31.5878	-4.55511	0.604781	-7.08891	1.35173e-12	4.13178e-10	NONC	9
itf15g06720	GRAS family transcription factor	Chr15	4225396	4226896	57.0327	-3.01099	0.630572	-4.84699	1.25351e-06	2.10313e-05	NONC	9
itf15g06870	Thiamine pyrophosphate dependent pyruvate decarboxylase family protein	Chr15	4359711	4363059	6349.55	2.75655	0.474767	5.77598	7.65052e-09	3.905e-07	NONC	9
itf15g06980	wall associated kinase	Chr15	4422698	4428174	6.89832	-4.79216	0.673305	-5.57949	2.4123e-08	9.25688e-07	NONC	9
itf15g07400	hypothetical protein	Chr15	4733542	4737810	179.563	-4.05105	0.771325	-5.63055	1.79631e-08	7.39464e-07	NONC_TNR	9_10
itf15g07420	FAD-dependent oxidoreductase family protein	Chr15	4762142	4763336	206.325	-2.05774	0.38299	-5.37564	7.63102e-08	2.29561e-06	NONC_TNR	9_10
itf15g07630	laccase	Chr15	4870265	4873436	40.8353	-3.92542	0.781267	-5.06998	3.97864e-07	8.5319e-06	NONC_TNR	9_10
itf15g07720	glutathione S-transferase tau	Chr15	4937067	4937981	36.8997	-4.11232	0.702664	-5.20971	1.89138e-07	4.80854e-06	NONC_TNR	9_10
itf15g07750	glutathione S-transferase tau	Chr15	4945310	4946423	299.818	2.73288	0.417807	6.52249	6.91509e-11	1.08812e-08	NONC_TNR	9_10
itf15g07810	glutathione S-transferase TAU	Chr15	4962824	4963827	499.909	-2.02279	0.454529	-4.4491	8.62297e-06	9.63085e-05	NONC_TNR	9_10
itf15g08010	zinc-finger protein	Chr15	5099572	5100394	52.6553	-2.05408	0.617412	-3.31897	0.000903492	0.00408963	NONC_TNR	9_10
itf15g08390	XB3 ortholog 1 in Arabidopsis thaliana	Chr15	5375895	5379551	328.283	2.23464	0.401182	5.5566	2.75081e-08	1.02577e-06	NONC_TNR	9_10
itf15g08660	DNAse I-like superfamily protein	Chr15	5636131	5641907	182.411	-3.80794	0.561862	-6.86157	6.81071e-12	1.66163e-09	NONC_TNR_NCYTHA	9_10_5
itf15g08700	zinc induced facilitator-like	Chr15	5678719	5683789	1715.22	-4.13691	0.561272	-7.52049	5.45724e-14	3.45534e-11	NONC_TNR_NCYTHA	9_10_5
itf15g09210	Zinc-binding alcohol dehydrogenase family protein	Chr15	6046373	6049771	19.6783	2.21091	0.515017	4.22451	2.39462e-05	0.000220118	NONC_TNR_NCYTHA	9_10_5
itf15g09220	SKU5 similar	Chr15	6050556	6055801	113.822	2.76585	0.745488	3.36122	0.000775978	0.00361972	NONC_TNR_NCYTHA	9_10_5
itf15g09470	Mitochondrial substrate carrier family protein	Chr15	6274640	6281095	10.9788	-2.48073	0.599129	-4.03198	5.531e-05	0.000430142	NONC_TNR_NCYTHA	9_10_5
itf15g09560	PLATZ transcription factor family protein	Chr15	6357506	6359068	385.198	-3.4115	0.483803	-7.12163	1.06657e-12	3.50166e-10	NONC_TNR_NCYTHA	9_10_5
itf15g09720	Reverse transcriptase-like domain containing protein	Chr15	6575987	6580389	1240.23	2.95927	0.449887	6.55323	5.6306e-11	9.1994e-09	NONC_TNR_NCYTHA	9_10_5
itf15g09740	O-Glycosyl hydrolases family 17 protein	Chr15	6588147	6590684	515.893	3.3689	0.57832	5.73427	9.79314e-09	4.70938e-07	NONC_TNR_NCYTHA	9_10_5
itf15g10010	Minichromosome maintenance (MCM2/3/5) family protein	Chr15	6728124	6733091	263.213	2.70994	0.472868	5.68083	1.34043e-08	5.93041e-07	NONC_TNR_NCYTHA	9_10_5
itf15g10060	HXXXD-type acyl-transferase family protein	Chr15	6759259	6761855	6.09473	-2.61276	0.779194	-3.42887	0.000606093	0.00296359	NONC_TNR_NCYTHA	9_10_5
itf15g10350	Bifunctional inhibitor/lipid-transfer protein/seed storage 2S albumin superfamily protein	Chr15	7222878	7224314	575.412	5.0377	0.62671	7.84905	4.19199e-15	5.06717e-12	NONC_TNR_NCYTHA	9_10_5
itf15g11370	Protein kinase superfamily protein	Chr15	8192842	8197178	14.7348	2.95013	0.724404	3.70635	0.000210267	0.00125994	NONC_TNR_NCYTHA	9_10_5
itf15g11600	basic helix-loop-helix (bHLH) DNA-binding superfamily protein	Chr15	8390827	8396075	39.4235	4.06149	0.719842	5.43819	5.38254e-08	1.74346e-06	NONC_TNR_NCYTHA	9_10_5
itf15g11940	hypothetical protein	Chr15	8719679	8720193	41.0627	-2.49284	0.449853	-5.48136	4.22059e-08	1.43798e-06	NONC_TNR_NCYTHA	9_10_5
itf15g12000	long-chain acyl-CoA synthetase	Chr15	8762974	8774366	390.29	-2.2969	0.364898	-6.29184	3.1372e-10	3.29753e-08	NONC_TNR_NCYTHA	9_10_5
itf15g12100	allene oxide synthase	Chr15	8843536	8844979	3454.12	-3.39021	0.370791	-9.1564	5.36575e-20	4.75638e-16	NONC_TNR_NCYTHA	9_10_5
itf15g12110	lipoxygenase	Chr15	8849733	8855346	4934.19	-2.89778	0.377583	-7.69001	1.47123e-14	1.20119e-11	NONC_TNR_NCYTHA	9_10_5
itf15g12150	PLAT/LH2 domain-containing lipoxygenase family protein	Chr15	8881745	8891273	5.16498	-2.58826	0.672242	-3.48727	0.00048797	0.00248975	NONC_TNR_NCYTHA	9_10_5
itf15g12510	conserved hypothetical protein	Chr15	9305918	9309204	7.11314	2.94579	0.632969	4.3926	1.12005e-05	0.00011829	NONC_TNR_NCYTHA	9_10_5
itf15g12690	respiratory burst oxidase homolog B	Chr15	9523069	9529402	394.858	2.09315	0.586424	3.50348	0.000459223	0.00236945	NONC_TNR_NCYTHA	9_10_5
itf15g12700	xyloglucan endotransglucosylase/hydrolase	Chr15	9535274	9539742	802.327	2.84088	0.534251	5.26062	1.43569e-07	3.80651e-06	NONC_TNR_NCYTHA	9_10_5
itf15g12720	Actin-binding FH2 (formin homology 2) family protein	Chr15	9571613	9574869	20.7852	2.17545	0.469894	4.57003	4.87654e-06	6.11996e-05	NONC_TNR_NCYTHA	9_10_5
itf15g13380	Polynucleotidyl transferase, ribonuclease H-like superfamily protein	Chr15	10169231	10173954	48.9597	-2.11056	0.52505	-3.91211	9.14941e-05	0.000647963	NONC_TNR_NCYTHA	9_10_5
itf15g13590	zinc induced facilitator-like	Chr15	10512331	10512793	28.1565	2.35036	0.519232	4.43298	9.29381e-06	0.000101917	NONC_TNR_NCYTHA	9_10_5
itf15g13610	zinc induced facilitator	Chr15	10571456	10580650	51.4197	2.34807	0.469897	4.93645	7.95564e-07	1.48362e-05	NONC_TNR_NCYTHA	9_10_5
itf15g13650	Ribulose bisphosphate carboxylase (small chain) family protein	Chr15	10612943	10615006	114.553	2.98528	0.32886	9.04567	1.48751e-19	6.78405e-16	NONC_TNR_NCYTHA	9_10_5
itf15g13680	Galactose oxidase/kelch repeat superfamily protein	Chr15	10649913	10654170	149.359	2.48072	0.426892	5.79611	6.78722e-09	3.553e-07	NONC_TNR_NCYTHA	9_10_5
itf15g13820	conserved hypothetical protein	Chr15	10857758	10858472	424.988	2.92115	0.399379	7.30633	2.74541e-13	1.15887e-10	NONC_TNR_NCYTHA	9_10_5
itf15g14830	Pectinacetylesterase family protein	Chr15	12119926	12125801	82.6131	3.27448	0.584378	5.49577	3.8901e-08	1.347e-06	NONC_TNR_NCYTHA	9_10_5
itf15g15240	ferric reduction oxidase	Chr15	12760356	12766210	15.7513	2.29386	0.638981	3.41677	0.00063368	0.00307228	NONC_TNR_NCYTHA	9_10_5
itf15g15530	NAC domain containing protein	Chr15	13160702	13163103	13.4954	3.52765	0.647922	5.12583	2.96232e-07	6.75616e-06	NONC_TNR_NCYTHA	9_10_5
itf15g15570	multidrug resistance-associated protein	Chr15	13296752	13303145	300.35	-2.56654	0.468034	-5.50205	3.75409e-08	1.3105e-06	NONC_TNR_NCYTHA	9_10_5
itf15g15780	conserved hypothetical protein	Chr15	13630730	13634219	25.9107	2.77034	0.499789	5.45925	4.7816e-08	1.60349e-06	NONC_TNR_NCYTHA	9_10_5
itf15g15960	Pollen Ole e 1 allergen and extensin family protein	Chr15	13937830	13939492	27.1642	2.03033	0.552651	3.64725	0.000265067	0.00152553	NONC_TNR_NCYTHA	9_10_5
itf15g16030	hypothetical protein	Chr15	14047683	14048346	28.1561	2.44593	0.479158	5.05223	4.36685e-07	9.16625e-06	NONC_TNR_NCYTHA	9_10_5
itf15g16700	C2 calcium/lipid-binding and GRAM domain containing protein	Chr15	15092800	15100710	8.81687	2.07478	0.658293	3.03556	0.00240093	0.00900281	NONC_TNR_NCYTHA	9_10_5
itf15g17210	TMV resistance protein N	Chr15	15866731	15867235	87.4807	-2.5349	0.453861	-5.58884	2.28595e-08	8.92661e-07	NONC_TNR_NCYTHA	9_10_5
itf15g18070	terpene synthase	Chr15	16980820	16983131	90.3292	-4.21704	0.627588	-6.6291	3.37743e-11	6.23722e-09	NONC_TNR_NCYTHA	9_10_5
itf15g18380	NB-ARC domain-containing disease resistance protein	Chr15	17327999	17330838	4.19839	-2.89463	0.599276	-4.44085	8.96057e-06	9.92868e-05	NONC_TNR_NCYTHA	9_10_5
itf15g19130	vesicle-associated membrane protein	Chr15	18096913	18100094	97.3525	-2.06788	0.474946	-4.35716	1.31759e-05	0.000135232	NONC_TNR_NCYTHA	9_10_5
itf15g19420	conserved hypothetical protein	Chr15	18404735	18407724	213.264	-2.12134	0.46318	-4.5792	4.66747e-06	5.91903e-05	NONC_NCYTHA	9_5
itf15g19570	Integrase-type DNA-binding superfamily protein	Chr15	18558434	18560016	3.61653	-3.02278	0.689611	-3.64182	0.000270719	0.00155256
itf15g19720	plant natriuretic peptide A	Chr15	18717423	18718922	49.64	-2.07418	0.639605	-3.17312	0.0015081	0.00617852
itf15g20080	S-adenosyl-L-methionine-dependent methyltransferases superfamily protein	Chr15	19238399	19243227	2344.92	-2.10084	0.517718	-4.06513	4.80063e-05	0.000383143
itf15g20400	hypothetical protein	Chr15	19498801	19504380	9.0372	2.5125	0.543376	4.48667	7.23438e-06	8.33552e-05
itf15g20490	Fatty acid/sphingolipid desaturase	Chr15	19585820	19587922	52.4926	2.2247	0.413154	5.35631	8.49371e-08	2.50136e-06
itf15g20530	Fatty acid/sphingolipid desaturase	Chr15	19621004	19623293	298.433	2.28451	0.506157	4.47199	7.74961e-06	8.8033e-05
itf15g21010	phosphofructokinase	Chr15	20124439	20130976	5.62232	-3.33483	0.793584	-3.95299	7.71812e-05	0.000563249
itf15g21400	carotenoid cleavage dioxygenase	Chr15	20443202	20448549	291.168	3.49351	0.672193	5.36623	8.03987e-08	2.39155e-06
itf15g21520	Phosphorylase superfamily protein	Chr15	20646475	20648790	35.269	2.01378	0.632818	3.15894	0.00158343	0.00641697
itf15g21610	Enoyl-CoA hydratase/isomerase family	Chr15	20768290	20776807	19.7837	-2.55221	0.662485	-3.79004	0.000150621	0.000962621
itf15g21830	Ankyrin repeat family protein	Chr15	20970565	20974605	54.1953	2.52432	0.431776	5.80734	6.34744e-09	3.35581e-07
itf15g21850	ankyrin repeat family protein	Chr15	20977663	20982466	93.0081	2.06623	0.386934	5.33206	9.71027e-08	2.78861e-06
itf15g22070	potassium channel in Arabidopsis thaliana	Chr15	21134378	21138510	3.81631	-2.04578	0.592397	-3.2242	0.00126325	0.005351
itf15g22080	potassium channel in Arabidopsis thaliana	Chr15	21141130	21146144	112.84	-2.75539	0.520418	-5.30807	1.10793e-07	3.11978e-06
itf15g22090	potassium channel in Arabidopsis thaliana	Chr15	21149694	21154206	46.9163	-3.81238	0.75902	-4.95585	7.20143e-07	1.37494e-05
itf15g22910	cytochrome P450, family 71, subfamily B, polypeptide	Chr15	21791380	21793194	8.28093	-3.01977	0.549956	-5.10749	3.26474e-07	7.26521e-06
itf15g22940	cytochrome P450, family 71, subfamily B, polypeptide	Chr15	21824686	21826836	67.689	-2.97927	0.615314	-4.78804	1.68417e-06	2.66534e-05
itf15g22970	terpene synthase	Chr15	21853757	21856114	188.796	-2.05533	0.628081	-3.22909	0.00124184	0.00527973
itf15g22980	cytochrome P450, family 71, subfamily B, polypeptide	Chr15	21874815	21878018	135.654	-2.43893	0.654214	-3.66657	0.000245827	0.0014374
itf15g22990	terpene synthase	Chr15	21890529	21893034	203.475	-4.02534	0.663848	-5.95911	2.53615e-09	1.62908e-07
itf15g23000	terpene synthase	Chr15	21901224	21903550	306.888	-3.3981	0.712118	-4.67313	2.96644e-06	4.16621e-05
itf15g23040	cytochrome P450, family 71, subfamily B, polypeptide	Chr15	21917964	21922708	62.6248	-2.03457	0.450538	-4.4884	7.17592e-06	8.29328e-05
itf15g23180	terpene synthase	Chr15	22000346	22001267	13.4718	-2.15808	0.65423	-3.23923	0.00119854	0.00514088
itf15g23250	Nucleotide-diphospho-sugar transferase family protein	Chr15	22050203	22054217	11.2885	-3.74882	0.741037	-4.55648	5.20176e-06	6.43744e-05
itf15g23280	Bifunctional inhibitor/lipid-transfer protein/seed storage 2S albumin superfamily protein	Chr15	22075332	22076231	239.266	3.43285	0.765954	3.98868	6.64408e-05	0.000498128
itf15g23920	hypothetical protein	Chr15	22987927	22988981	47.3554	-2.39983	0.525683	-4.56369	5.02632e-06	6.26652e-05

## Sheet: B_50DAT_SR_vs_B_50DAT_FR
Gene	Functional Annotation	Chr	Start	Stop	baseMean	log2FoldChange	lfcSE	stat	pvalue	padj	Trait	QTL_in_Trait_Order
itf00g02500	myb-like transcription factor family protein	Chr00	3820250	3825370	1766.23	-3.75041	0.562034	-6.81446	9.46155e-12	4.89516e-10
itf00g04750	Kunitz family trypsin and protease inhibitor protein	Chr00	7687167	7687779	52.5524	-2.13435	0.309168	-6.85981	6.89511e-12	3.78846e-10
itf00g04760	Kunitz family trypsin and protease inhibitor protein	Chr00	7690437	7691496	42.7502	-2.11798	0.425957	-4.90047	9.561e-07	9.4554e-06
itf00g04770	Kunitz family trypsin and protease inhibitor protein	Chr00	7702480	7703395	31.555	-3.45186	0.547132	-6.1071	1.01458e-09	2.72958e-08
itf00g04910	Serine carboxypeptidase S28 family protein	Chr00	7908949	7911529	17.179	-2.21089	0.657321	-3.37364	0.000741817	0.00288408
itf00g09110	Survival protein SurE-like phosphatase/nucleotidase	Chr00	14968942	14971256	5147.52	-3.03056	0.482236	-6.33921	2.30943e-10	7.59352e-09
itf00g09120	Survival protein SurE-like phosphatase/nucleotidase	Chr00	14984533	14985930	681.053	-3.03226	0.533202	-5.801	6.59208e-09	1.35579e-07
itf00g09130	Survival protein SurE-like phosphatase/nucleotidase	Chr00	14987372	14988904	359.984	-2.83183	0.525235	-5.47593	4.35219e-08	6.68359e-07
itf00g09160	Survival protein SurE-like phosphatase/nucleotidase	Chr00	14995359	14996766	531.962	-3.40957	0.509541	-6.78864	1.13193e-11	5.61593e-10
itf00g09180	Survival protein SurE-like phosphatase/nucleotidase	Chr00	15006029	15006461	253.155	-3.27167	0.553279	-6.02855	1.65435e-09	4.17006e-08
itf00g09200	Survival protein SurE-like phosphatase/nucleotidase	Chr00	15007886	15014270	697.061	-2.95643	0.528368	-5.704	1.17025e-08	2.21026e-07
itf00g10750	Toll-Interleukin-Resistance (TIR) domain-containing protein	Chr00	18201454	18203845	46.1635	2.38224	0.436754	5.42895	5.66861e-08	8.39807e-07
itf00g10770	Disease resistance protein (TIR-NBS-LRR class)	Chr00	18208031	18210667	43.272	3.49242	0.506242	6.77858	1.2136e-11	5.98761e-10
itf00g10780	Disease resistance protein (TIR-NBS-LRR class) family	Chr00	18226279	18230945	121.008	2.30016	0.382583	6.00363	1.92956e-09	4.77774e-08
itf00g11260	hypothetical protein	Chr00	19046616	19047811	43.1607	4.22386	0.641252	6.2876	3.22407e-10	1.00749e-08
itf00g11930	expansin-like B1	Chr00	20247654	20250809	17.7566	-3.02851	0.712493	-4.23526	2.28285e-05	0.000146249
itf00g13780	GroES-like zinc-binding dehydrogenase family protein	Chr00	23076171	23078304	186.05	-3.03814	0.440731	-6.8983	5.26295e-12	3.02284e-10
itf00g13870	Glutathione S-transferase family protein	Chr00	23193675	23196411	405.179	2.08594	0.322974	6.45523	1.08057e-10	3.96353e-09
itf00g15160	drought-repressed	Chr00	25137846	25138494	46.3179	-2.08323	0.811085	-3.5598	0.000371133	0.00159289
itf00g17090	hypothetical protein	Chr00	28550331	28551312	117.375	-2.07628	0.508591	-4.07053	4.69066e-05	0.00027355
itf00g19530	Protein kinase family protein with leucine-rich repeat domain	Chr00	32469244	32471687	5.53171	-2.32869	0.667607	-3.17089	0.00151972	0.00530923
itf00g19540	Protein kinase family protein with leucine-rich repeat domain	Chr00	32477188	32479276	52.437	-2.3527	0.352738	-6.62756	3.4129e-11	1.47576e-09
itf00g20060	NB-ARC domain-containing disease resistance protein	Chr00	33411617	33414872	58.6118	-3.22488	0.328565	-9.51767	1.77098e-21	1.56985e-18
itf00g20230	conserved hypothetical protein	Chr00	33668636	33671809	70.3764	-2.53862	0.336702	-7.49624	6.56732e-14	6.74304e-12
itf00g20480	organellar single-stranded DNA binding protein	Chr00	34135142	34137348	6.00551	2.65226	0.540761	4.62992	3.65799e-06	3.02761e-05
itf00g20680	cysteine-rich RLK (RECEPTOR-like protein kinase)	Chr00	34370488	34373872	5.03427	-2.74347	0.616887	-3.97732	6.96951e-05	0.000383013
itf00g21090	cytochrome P450, family 81, subfamily F, polypeptide	Chr00	35060948	35063458	563.25	-2.60707	0.258231	-10.0916	6.01626e-24	8.88836e-21
itf00g21220	hypothetical protein	Chr00	35241507	35244645	46.5442	2.02543	0.341257	5.91581	3.30255e-09	7.53215e-08
itf00g21310	indole-3-acetate beta-D-glucosyltransferase	Chr00	35400063	35401895	701.103	-4.33202	0.591946	-7.4283	1.10005e-13	1.05992e-11
itf00g21790	pleiotropic drug resistance	Chr00	35964852	35965969	23.8491	-2.45469	0.352922	-6.83179	8.38599e-12	4.44902e-10
itf00g22280	lipid transfer protein	Chr00	36806764	36808413	4.44799	-3.05515	0.78627	-3.27879	0.00104252	0.0038548
itf00g23050	S-adenosyl-L-methionine-dependent methyltransferases superfamily protein	Chr00	38337771	38341490	54.8235	2.96441	0.58435	5.0967	3.45622e-07	3.93759e-06
itf00g25120	squamosa promoter binding protein-like	Chr00	41354360	41355402	477.589	2.26502	0.399023	5.67264	1.40611e-08	2.56819e-07
itf00g25230	MYB-like	Chr00	41518969	41520177	19.8142	-4.07185	0.74489	-4.93034	8.2085e-07	8.31576e-06
itf00g25380	MATE efflux family protein	Chr00	41720581	41723532	204.324	-3.41394	0.751841	-5.3344	9.58615e-08	1.30731e-06
itf00g25560	Leucine-rich repeat receptor-like protein kinase family protein	Chr00	41947307	41949634	1.94752	-2.7153	0.763154	-3.11457	0.00184213	0.00624524
itf00g26260	alpha/beta-Hydrolases superfamily protein	Chr00	42873072	42876454	21.4972	-2.42914	0.734671	-3.37082	0.000749436	0.00290691
itf00g26760	Calcium-dependent lipid-binding (CaLB domain) family protein	Chr00	43481805	43486633	142.389	2.64539	0.442572	5.97805	2.25818e-09	5.44934e-08
itf00g27440	cytochrome P450, family 76, subfamily C, polypeptide	Chr00	44614931	44616078	3.15877	2.4508	0.719526	3.12175	0.0017978	0.00611445
itf00g28230	hypothetical protein	Chr00	45842791	45843088	4.57578	2.4849	0.805247	3.3337	0.000856976	0.00325808
itf00g28560	conserved hypothetical protein	Chr00	46307789	46308970	3.0573	2.69717	0.734047	3.28633	0.00101502	0.00376728
itf00g28890	NAC domain containing protein	Chr00	46746091	46748213	20.0521	-2.49994	0.531593	-4.61871	3.86141e-06	3.17522e-05
itf00g28920	Kunitz family trypsin and protease inhibitor protein	Chr00	46775575	46776555	79.5809	-2.11513	0.355198	-5.9083	3.45652e-09	7.82958e-08
itf00g29170	flowering promoting factor	Chr00	47036798	47037122	77.8048	-3.20091	0.794852	-5.09909	3.41296e-07	3.89531e-06
itf00g29250	cytochrome P450, family 714, subfamily A, polypeptide	Chr00	47225230	47228089	58.5319	-3.92827	0.552882	-6.8183	9.21247e-12	4.78491e-10
itf00g29350	expansin-like B1	Chr00	47369750	47372403	8.08609	-3.38842	0.678489	-4.2518	2.12057e-05	0.000137174
itf00g29810	heat shock protein	Chr00	47718584	47719528	113.28	4.09983	0.696285	5.32221	1.02516e-07	1.3895e-06
itf00g30510	Subtilase family protein	Chr00	48260973	48264796	46.5237	2.78191	0.626671	4.3771	1.2027e-05	8.43669e-05
itf00g30790	ribonuclease	Chr00	48535169	48535829	52.8166	4.85854	0.644529	7.05053	1.78239e-12	1.1646e-10
itf00g30960	NB-ARC domain-containing disease resistance protein	Chr00	48732157	48737093	151.103	2.43935	0.300131	8.11215	4.97321e-16	9.05839e-14
itf00g32050	heat shock protein 18.2	Chr00	49957858	49958341	57.1277	2.74449	0.597344	4.37392	1.22037e-05	8.53586e-05
itf00g32090	elicitor-activated gene 3-2	Chr00	49978888	49980808	1167.84	-2.18784	0.392643	-5.5907	2.26154e-08	3.80399e-07
itf00g32100	elicitor-activated gene 3-2	Chr00	49984451	49986503	8.32142	3.56494	0.656265	4.89681	9.74041e-07	9.59714e-06
itf00g32850	Calcium-binding EF-hand family protein	Chr00	50827365	50827919	7.84847	2.43771	0.659906	3.52338	0.000426073	0.00179523
itf00g33180	Pathogenesis-related thaumatin superfamily protein	Chr00	51090026	51091657	315.5	2.34911	0.397455	5.91798	3.2592e-09	7.45885e-08
itf00g33550	Disease resistance protein (TIR-NBS-LRR class) family	Chr00	51427307	51430487	263.375	3.45357	0.430556	8.01203	1.12832e-15	1.76502e-13
itf00g34060	hydroxy methylglutaryl CoA reductase	Chr00	51848918	51850454	64.5634	-2.00411	0.539381	-3.76684	0.000165324	0.000801488
itf00g34070	hydroxy methylglutaryl CoA reductase	Chr00	51851664	51852450	278.506	-2.5455	0.467118	-5.47444	4.38887e-08	6.73087e-07
itf00g34360	Kinase interacting (KIP1-like) family protein	Chr00	52182814	52183354	6.34775	-2.16029	0.636008	-3.18066	0.0014694	0.00516126
itf00g34820	NAD(P)-binding Rossmann-fold superfamily protein	Chr00	52601644	52601944	14.6024	-2.36255	0.597083	-3.83979	0.000123138	0.000620661
itf00g35170	conserved hypothetical protein	Chr00	52840802	52841662	7.53828	2.67534	0.650113	3.89294	9.90358e-05	0.000515693
itf00g36200	1-aminocyclopropane-1-carboxylic acid (acc) synthase	Chr00	53747913	53749171	188.154	-3.09074	0.558466	-5.61426	1.97405e-08	3.39697e-07
itf00g36940	cytochrome P450, family 72, subfamily A, polypeptide	Chr00	54310037	54311341	44.4167	-2.09739	0.435056	-4.76878	1.85341e-06	1.68448e-05
itf00g38840	RHO-related protein from plants	Chr00	56083317	56085979	94.3949	2.59807	0.391044	6.6288	3.38429e-11	1.46816e-09
itf00g39040	cryptochrome	Chr00	56251438	56254147	8.29836	2.35853	0.588805	3.87801	0.000105314	0.000544126
itf00g40220	Concanavalin A-like lectin protein kinase family protein	Chr00	57533583	57534635	102.636	-2.04661	0.397219	-5.15414	2.54798e-07	3.05631e-06
itf00g42000	inositol transporter	Chr00	59819189	59819609	90.8534	-2.05381	0.312475	-6.55347	5.62138e-11	2.29984e-09
itf00g42450	conserved hypothetical protein	Chr00	60300376	60302180	280.208	-3.17656	0.527796	-6.07255	1.25892e-09	3.27898e-08
itf00g43820	hydroxy methylglutaryl CoA reductase	Chr00	62224876	62225305	225.407	-2.14565	0.46098	-4.66291	3.11775e-06	2.63734e-05
itf00g45600	RING/U-box superfamily protein	Chr00	64436396	64436969	6.17619	3.00031	0.476716	5.99716	2.00797e-09	4.93055e-08
itf00g50700	glutathione S-transferase TAU	Chr00	71442371	71443484	81.4015	-3.31287	0.618411	-5.32319	1.01966e-07	1.38275e-06
itf00g50860	Sieve element occlusion C-terminus domain containing protein	Chr00	71679624	71680919	2.24914	-3.46467	0.737095	-4.21413	2.50745e-05	0.000158366
itf00g51870	heat shock protein	Chr00	72689105	72689643	26.3767	2.09442	0.617136	3.24003	0.00119518	0.00434193
itf00g51910	conserved hypothetical protein	Chr00	72745918	72746191	49.3137	-3.01014	0.704346	-4.2986	1.71881e-05	0.000114586
itf00g53310	AGAMOUS-like	Chr00	74648345	74649194	75.2429	2.00509	0.564126	3.55045	0.000384574	0.00164289
itf00g57400	heavy metal atpase	Chr00	80109829	80110820	36.1659	-2.26738	0.44038	-5.09877	3.41875e-07	3.90024e-06
itf00g57540	myb domain protein	Chr00	80297411	80298528	366.985	-2.2783	0.605354	-3.59266	0.000327325	0.00143214
itf00g58110	ethylene-responsive element binding factor	Chr00	80916695	80917466	15.4886	-3.84648	0.72505	-4.93432	8.04294e-07	8.17607e-06
itf00g58350	Bifunctional inhibitor/lipid-transfer protein/seed storage 2S albumin superfamily protein	Chr00	81140052	81140793	5.69999	-2.32953	0.759845	-3.34397	0.00082588	0.00315646
itf00g64880	NADH dehydrogenase subunit	Chr00	90700141	90700546	14.1684	-2.00322	0.464847	-4.21528	2.49467e-05	0.000157766
itf00g69230	delta(3), delta(2)-enoyl CoA isomerase	Chr00	97276912	97277209	13.5987	-3.09726	0.579479	-4.50784	6.54923e-06	5.0047e-05
itf00g79390	C2H2 and C2HC zinc fingers superfamily protein	Chr00	117331231	117331624	13.5253	-2.07809	0.461695	-4.32456	1.52839e-05	0.000103553
itf01g00020	phospholipase D delta	Chr01	2893	7353	6.53314	2.30387	0.669851	3.19418	0.00140227	0.00497075
itf01g00040	O-methyltransferase	Chr01	12328	15178	273.648	-2.3308	0.411835	-5.68372	1.31799e-08	2.43906e-07
itf01g00250	Uridine diphosphate glycosyltransferase 74E2	Chr01	148969	150616	138.327	-3.25783	0.584485	-5.575	2.47523e-08	4.11398e-07
itf01g00440	conserved hypothetical protein	Chr01	219351	220529	105.909	2.06051	0.510997	4.02207	5.76887e-05	0.000326061
itf01g00680	Protein E6	Chr01	332381	333940	305.557	2.58991	0.504165	5.13015	2.8951e-07	3.39459e-06
itf01g00850	ABC-2 type transporter family protein	Chr01	519628	521443	6.21423	-3.23367	0.737181	-4.37239	1.22896e-05	8.58464e-05
itf01g00860	basic helix-loop-helix (bHLH) DNA-binding superfamily protein	Chr01	522938	524911	46.5763	-2.30935	0.454068	-5.05778	4.24169e-07	4.6902e-06
itf01g01240	CAP (Cysteine-rich secretory proteins, Antigen 5, and Pathogenesis-related 1 protein) superfamily protein	Chr01	718172	718724	301.804	2.44288	0.565829	4.28557	1.82272e-05	0.000120726
itf01g01830	kunitz trypsin inhibitor	Chr01	1045869	1046754	345.631	3.66465	0.657354	5.528	3.23898e-08	5.21393e-07
itf01g01840	kunitz trypsin inhibitor	Chr01	1051692	1052305	18.5894	3.32091	0.719932	4.48542	7.27718e-06	5.48221e-05
itf01g01850	kunitz trypsin inhibitor	Chr01	1064339	1065218	17.5846	3.15073	0.669267	4.5543	5.25611e-06	4.13543e-05
itf01g01860	kunitz trypsin inhibitor	Chr01	1076454	1077369	178016	4.80826	0.664932	7.08173	1.42364e-12	9.58452e-11
itf01g01870	Kunitz family trypsin and protease inhibitor protein	Chr01	1087689	1090527	81851.3	4.41016	0.679163	6.23741	4.44876e-10	1.32333e-08
itf01g01890	kunitz trypsin inhibitor	Chr01	1102939	1103996	125842	4.90247	0.678062	7.0858	1.38244e-12	9.35452e-11
itf01g02060	phosphatidylserine decarboxylase	Chr01	1232482	1238175	468.398	-2.70936	0.500211	-5.43694	5.42023e-08	8.05702e-07
itf01g02100	actin-11	Chr01	1256414	1261187	117.852	3.02156	0.435245	6.90232	5.11603e-12	2.95138e-10
itf01g02410	Phosphatidylinositol-4-phosphate 5-kinase family protein	Chr01	1425188	1430281	345.862	-2.81258	0.41887	-6.71267	1.91094e-11	8.76167e-10
itf01g02440	senescence associated gene	Chr01	1442399	1445184	7.50978	-2.80236	0.573655	-4.52051	6.16916e-06	4.74152e-05
itf01g02620	Lactoylglutathione lyase / glyoxalase I family protein	Chr01	1568369	1570234	126.58	2.72882	0.474036	5.74462	9.21258e-09	1.79929e-07
itf01g02650	Protein of unknown function (DUF679)	Chr01	1584269	1585248	365.086	-2.10458	0.371867	-5.67181	1.413e-08	2.579e-07
itf01g02830	SKU5 similar	Chr01	1697784	1702318	47.1964	2.91525	0.528503	5.44459	5.19246e-08	7.74877e-07
itf01g03040	Bifunctional inhibitor/lipid-transfer protein/seed storage 2S albumin superfamily protein	Chr01	1832315	1833845	47.9354	2.31333	0.739793	3.46352	0.000533147	0.00217654
itf01g03120	Ubiquitin-specific protease family C19-related protein	Chr01	1859978	1866265	60.9708	2.32369	0.366208	6.32272	2.56994e-10	8.35481e-09
itf01g03180	Cupredoxin superfamily protein	Chr01	1891785	1893172	143.501	2.97484	0.527535	5.61288	1.98988e-08	3.414e-07
itf01g03240	acyl-CoA sterol acyl transferase	Chr01	1915091	1917488	4.99923	-3.0957	0.738154	-4.20176	2.64849e-05	0.000166073
itf01g03300	hypothetical protein	Chr01	1952339	1954040	1674.8	3.38112	0.473872	7.1519	8.55826e-13	6.1345e-11
itf01g03420	starch synthase	Chr01	2007038	2016615	937.818	2.51918	0.330208	7.61939	2.54875e-14	2.95978e-12
itf01g03460	MATE efflux family protein	Chr01	2061546	2068949	17.5685	3.80231	0.520202	6.9666	3.24685e-12	1.94906e-10
itf01g03570	beta-glucosidase	Chr01	2160199	2164632	164.501	3.06443	0.585283	5.28776	1.23826e-07	1.62854e-06
itf01g03580	beta-glucosidase	Chr01	2167688	2172403	190.859	3.37039	0.550965	6.09962	1.06319e-09	2.83869e-08
itf01g03650	xyloglucan endotransglucosylase/hydrolase	Chr01	2234982	2237324	362.913	2.0637	0.411827	5.00619	5.5517e-07	5.90781e-06
itf01g03850	cysteine-rich RLK (RECEPTOR-like protein kinase)	Chr01	2427660	2431223	50.2763	2.12951	0.724349	3.60242	0.000315263	0.00138575
itf01g03920	cysteine-rich RLK (RECEPTOR-like protein kinase)	Chr01	2465156	2468155	156.969	-3.40146	0.44821	-7.56324	3.9315e-14	4.32027e-12
itf01g04060	Protein of unknown function, DUF538	Chr01	2548849	2550433	110.866	2.34931	0.419264	5.59	2.27071e-08	3.80977e-07
itf01g04580	Late embryogenesis abundant (LEA) protein-related	Chr01	2922756	2924394	16.4837	-2.84388	0.649497	-4.21474	2.5007e-05	0.000158035
itf01g04600	alternative NAD(P)H dehydrogenase	Chr01	2952553	2955964	2770.46	-2.34679	0.497477	-4.73965	2.14085e-06	1.90624e-05
itf01g05530	GDSL-like Lipase/Acylhydrolase superfamily protein	Chr01	3721445	3726867	184.42	-2.47864	0.353746	-6.99429	2.66611e-12	1.64501e-10
itf01g05730	Homeodomain-like superfamily protein	Chr01	3908736	3914380	78.6759	-3.7775	0.653144	-5.74892	8.98148e-09	1.76535e-07
itf01g05740	Protein of unknown function (DUF688)	Chr01	3915162	3918478	394.51	2.31799	0.437306	5.31522	1.06529e-07	1.44023e-06
itf01g05850	senescence-associated gene	Chr01	4039259	4041447	5.42931	-3.93588	0.716142	-4.37854	1.19478e-05	8.39658e-05
itf01g06040	alpha/beta-Hydrolases superfamily protein	Chr01	4213386	4215472	199.38	2.74712	0.726137	3.86516	0.000111019	0.000569616
itf01g06120	RAB GTPase homolog A1D	Chr01	4277114	4278912	54.2042	3.06684	0.530477	5.74266	9.31999e-09	1.81573e-07
itf01g06330	Leucine-rich repeat transmembrane protein kinase	Chr01	4480571	4487325	75.3861	-2.27946	0.507716	-4.46132	8.14546e-06	6.04555e-05
itf01g06380	Leucine-rich repeat transmembrane protein kinase	Chr01	4522004	4529433	231.998	2.00812	0.437199	4.59786	4.26858e-06	3.46503e-05
itf01g06630	WRKY DNA-binding protein	Chr01	4763904	4765731	110.867	-2.81051	0.427625	-6.55755	5.46983e-11	2.24128e-09
itf01g07030	Protein of unknown function (DUF616)	Chr01	5356232	5359742	46.6564	2.20577	0.428385	5.13	2.89749e-07	3.3959e-06
itf01g07180	nine-cis-epoxycarotenoid dioxygenase	Chr01	5617984	5620355	10.0589	-2.50258	0.56811	-4.12645	3.68405e-05	0.000221551
itf01g07750	laccase	Chr01	6234699	6237381	42.3862	2.25605	0.623879	3.70578	0.000210744	0.00098373
itf01g08080	conserved hypothetical protein	Chr01	6663703	6665538	90.95	-2.55323	0.424859	-5.9904	2.09321e-09	5.11154e-08
itf01g08190	ABC-2 type transporter family protein	Chr01	6777610	6783393	239.698	6.55022	0.560544	11.3179	1.07026e-29	9.48711e-26
itf01g08200	hypothetical protein	Chr01	6783136	6784317	4.61412	2.40214	0.590844	3.87268	0.000107645	0.000554337
itf01g08440	plant U-box	Chr01	7073400	7075063	271.782	-2.29257	0.491001	-4.69033	2.72762e-06	2.34515e-05
itf01g09230	hypothetical protein	Chr01	8241659	8241983	5.32585	-2.66769	0.600582	-4.0447	5.23896e-05	0.000300129
itf01g09710	SAUR-like auxin-responsive protein family	Chr01	8931899	8937008	6.47763	2.67293	0.712847	3.74571	0.000179883	0.000860984
itf01g09950	2-oxoglutarate (2OG) and Fe(II)-dependent oxygenase superfamily protein	Chr01	9285159	9286931	344.503	-2.05962	0.435909	-4.72991	2.24616e-06	1.98842e-05
itf01g10060	2-oxoglutarate (2OG) and Fe(II)-dependent oxygenase superfamily protein	Chr01	9363004	9366583	101.057	2.58235	0.58584	4.45122	8.53832e-06	6.30896e-05
itf01g10930	hypothetical protein	Chr01	10541004	10545534	1.77921	-2.89303	0.724798	-3.13759	0.00170344	0.00584359
itf01g11600	alpha carbonic anhydrase	Chr01	11521815	11523663	4.58142	-2.14654	0.77809	-3.00971	0.00261494	0.00838627
itf01g11640	ovate family protein	Chr01	11620090	11620975	1.87716	3.03731	0.769193	3.48682	0.000488808	0.00202066
itf01g12360	hypothetical protein	Chr01	12513389	12513835	3.61654	2.28903	0.703097	3.23609	0.00121178	0.00439151
itf01g12580	Bifunctional inhibitor/lipid-transfer protein/seed storage 2S albumin superfamily protein	Chr01	12754920	12756113	343.699	-5.40893	0.677515	-8.13852	4.00151e-16	7.71103e-14
itf01g12970	Protein of unknown function (DUF594)	Chr01	13141271	13142388	16.6756	2.39957	0.752562	3.43124	0.000600828	0.00240911
itf01g13680	hypothetical protein	Chr01	14190687	14191257	29.0183	2.35594	0.632421	3.60486	0.000312323	0.0013751
itf01g13810	hypothetical protein	Chr01	14362327	14363117	3.80102	-2.25462	0.593385	-3.45516	0.000549974	0.00223692
itf01g13960	hypothetical protein	Chr01	14567378	14567982	9.11979	2.39062	0.643649	3.60919	0.000307153	0.0013548
itf01g14580	S-adenosyl-L-methionine-dependent methyltransferases superfamily protein	Chr01	15346183	15351720	2210.94	2.2423	0.392187	5.72011	1.06458e-08	2.03671e-07
itf01g15050	Survival protein SurE-like phosphatase/nucleotidase	Chr01	15903842	15905269	745.955	-2.92383	0.520138	-5.74217	9.34703e-09	1.81966e-07
itf01g15180	ribonucleotide reductase 2A	Chr01	16061574	16066665	52.9538	-2.39226	0.363744	-6.53568	6.33193e-11	2.51696e-09	NONC	1
itf01g15460	hypothetical protein	Chr01	16410553	16412326	2.15369	-2.26686	0.749851	-3.09863	0.00194419	0.00652719	NONC	1
itf01g15490	Protein of unknown function, DUF642	Chr01	16432485	16436970	143.538	4.81908	0.709966	7.02516	2.13817e-12	1.3474e-10	NONC	1
itf01g15510	Adenine nucleotide alpha hydrolases-like superfamily protein	Chr01	16471591	16473255	14.8115	2.40665	0.698453	3.04835	0.00230103	0.00753309	NONC	1
itf01g15830	ARM repeat superfamily protein	Chr01	16836134	16838359	228.538	2.55978	0.374947	6.82185	8.98728e-12	4.68625e-10	NONC	1
itf01g16400	Ankyrin repeat family protein	Chr01	17590551	17594832	30.1249	-4.46077	0.702942	-5.84933	4.93554e-09	1.06276e-07	NONC	1
itf01g16460	photosystem II subunit X	Chr01	17650640	17650988	19.4766	2.19181	0.686491	3.17204	0.00151373	0.00529318	NONC	1
itf01g17420	Protein of unknown function (DUF630 and DUF632)	Chr01	18719430	18723213	47.6127	2.36067	0.498344	4.73309	2.21126e-06	1.96144e-05	NONC	1
itf01g17640	glutathione S-transferase (class zeta)	Chr01	18989372	18993558	12.7624	2.39294	0.568205	4.13103	3.61138e-05	0.000217871	NONC	1
itf01g18460	cation/hydrogen exchanger	Chr01	19636726	19642617	28.1055	-2.81241	0.605626	-4.55709	5.1867e-06	4.09045e-05	NONC_NCYTHA	1_1
itf01g18610	Adenine nucleotide alpha hydrolases-like superfamily protein	Chr01	19738606	19741740	39.0254	-2.2237	0.473795	-4.67748	2.90415e-06	2.47532e-05	NONC_NCYTHA	1_1
itf01g18860	ankyrin	Chr01	20000447	20003786	12.5932	-4.40492	0.698012	-5.45481	4.90252e-08	7.3782e-07	NONC_NCYTHA	1_1
itf01g18940	DDE superfamily endonuclease domain containing protein	Chr01	20053431	20055549	341.49	-2.65757	0.383043	-6.93621	4.0275e-12	2.36954e-10	NONC_NCYTHA	1_1
itf01g19120	hypothetical protein	Chr01	20200994	20204410	3.86865	3.04157	0.724506	3.57162	0.000354786	0.00153437	NONC_NCYTHA	1_1
itf01g19340	COP1-interacting protein	Chr01	20420269	20425525	37.388	4.5025	0.687149	6.26754	3.66787e-10	1.12558e-08	NONC_NCYTHA	1_1
itf01g19410	CBS domain-containing protein	Chr01	20481065	20484143	33.5386	2.64068	0.361133	7.26024	3.86404e-13	3.11383e-11	NONC_NCYTHA_TNR	1_1_1
itf01g19690	Disease resistance protein (CC-NBS-LRR class) family	Chr01	20708616	20711393	150.523	-2.35459	0.461436	-5.11521	3.13389e-07	3.62819e-06	NONC_NCYTHA_TNR	1_1_1
itf01g19700	Leucine-rich receptor-like protein kinase family protein	Chr01	20714807	20717878	131.805	-3.82621	0.419202	-9.0473	1.46549e-19	7.21702e-17	NONC_NCYTHA_TNR	1_1_1
itf01g19720	Leucine-rich receptor-like protein kinase family protein	Chr01	20719858	20721547	7.9045	-3.00668	0.558978	-4.82742	1.38313e-06	1.30942e-05	NONC_NCYTHA_TNR	1_1_1
itf01g19910	Nucleic acid-binding, OB-fold-like protein	Chr01	20897919	20899942	6.94972	2.94172	0.639942	4.24693	2.16716e-05	0.000139476	NONC_NCYTHA_TNR	1_1_1
itf01g20130	NB-ARC domain-containing disease resistance protein	Chr01	21077356	21080255	139.656	-2.25044	0.527366	-4.29697	1.73145e-05	0.000115256	NONC_NCYTHA_TNR	1_1_1
itf01g20230	tetratricopetide-repeat thioredoxin-like	Chr01	21209181	21213733	113.05	2.25097	0.411754	5.45785	4.81928e-08	7.29005e-07	NONC_NCYTHA_TNR	1_1_1
itf01g20300	Protein of unknown function (DUF640)	Chr01	21270258	21270792	98.1311	2.79654	0.527033	5.32142	1.0296e-07	1.39481e-06	NONC_NCYTHA_TNR	1_1_1
itf01g20780	Ribosomal protein L13 family protein	Chr01	21843330	21846319	140.939	2.07362	0.30469	6.79806	1.06037e-11	5.37115e-10	NONC_NCYTHA_TNR	1_1_1
itf01g20990	gibberellin 2-oxidase	Chr01	22005740	22007293	4037.15	-2.86521	0.460886	-6.22858	4.7069e-10	1.39088e-08	NONC_NCYTHA_TNR	1_1_1
itf01g21000	Protein of unknown function (DUF_B2219) domain containing protein	Chr01	22032159	22034787	487.132	3.04662	0.630794	4.78	1.75299e-06	1.60527e-05	NONC_NCYTHA_TNR	1_1_1
itf01g21160	nine-cis-epoxycarotenoid dioxygenase	Chr01	22189969	22191809	208.157	2.22696	0.550581	4.04096	5.32322e-05	0.000304234	NONC_NCYTHA_TNR	1_1_1
itf01g21240	glutathione S-transferase TAU	Chr01	22234444	22235193	120.171	-2.81415	0.529093	-5.34493	9.04525e-08	1.24697e-06	NONC_NCYTHA_TNR	1_1_1
itf01g21310	glutathione S-transferase TAU	Chr01	22261459	22262543	677.604	2.36492	0.585061	4.31737	1.57903e-05	0.000106441	NONC_NCYTHA_TNR	1_1_1
itf01g21370	conserved hypothetical protein	Chr01	22304275	22306696	13.4509	2.96425	0.464554	6.20267	5.55125e-10	1.60811e-08	NONC_NCYTHA_TNR	1_1_1
itf01g21440	hypothetical protein	Chr01	22339926	22340544	49.1072	-2.1605	0.367459	-5.83379	5.41832e-09	1.14357e-07	NONC_NCYTHA_TNR	1_1_1
itf01g21450	hypothetical protein	Chr01	22341596	22343991	20.509	-2.20293	0.421293	-5.14378	2.69258e-07	3.19374e-06	NONC_NCYTHA_TNR	1_1_1
itf01g21670	glycerol-3-phosphate acyltransferase	Chr01	22483916	22487244	119.554	-4.52734	0.660182	-6.79596	1.07596e-11	5.41913e-10	NONC_NCYTHA_TNR	1_1_1
itf01g22310	Protein kinase superfamily protein	Chr01	23024578	23028841	34.8673	2.10385	0.343047	6.09084	1.12322e-09	2.97246e-08	NONC_NCYTHA_TNR	1_1_1
itf01g22420	cytochrome P450, family 707, subfamily A, polypeptide	Chr01	23087025	23089943	12.4907	2.93833	0.620284	4.56195	5.06814e-06	4.0184e-05	NONC_NCYTHA	1_1
itf01g22440	redox responsive transcription factor	Chr01	23102765	23103929	992.731	-2.1694	0.466343	-4.6528	3.2746e-06	2.74771e-05	NONC_NCYTHA	1_1
itf01g22460	redox responsive transcription factor	Chr01	23110260	23111448	5121.69	-2.07824	0.443132	-4.69951	2.60786e-06	2.25972e-05	NONC_NCYTHA	1_1
itf01g22470	redox responsive transcription factor	Chr01	23115928	23116975	3076.31	-2.22629	0.444498	-5.01338	5.34808e-07	5.7209e-06	NONC_NCYTHA	1_1
itf01g22500	protein disulfide isomerases	Chr01	23129130	23130856	196.486	-2.25463	0.471755	-4.78062	1.74757e-06	1.60197e-05	NONC_NCYTHA	1_1
itf01g22510	Calcium-binding EF-hand family protein	Chr01	23131335	23131890	167.801	-2.26224	0.401037	-5.63594	1.74109e-08	3.04011e-07	NONC_NCYTHA	1_1
itf01g22660	serine carboxypeptidase-like	Chr01	23272217	23275085	206.743	3.11831	0.51453	6.08903	1.13596e-09	3.00284e-08	NONC_NCYTHA	1_1
itf01g22770	methyl esterase	Chr01	23367647	23369083	81.8937	-2.95709	0.490209	-6.00155	1.95448e-09	4.82366e-08
itf01g22940	Transducin/WD40 repeat-like superfamily protein	Chr01	23495736	23497677	172.808	-2.78645	0.458231	-6.0576	1.38165e-09	3.56721e-08
itf01g23130	conserved hypothetical protein	Chr01	23666147	23667049	27.7987	-2.24575	0.465287	-4.76158	1.92088e-06	1.73571e-05
itf01g23750	AGAMOUS-like	Chr01	24219050	24221600	7.45286	2.2049	0.720476	2.95294	0.00314763	0.00980957
itf01g23970	Disease resistance-responsive (dirigent-like protein) family protein	Chr01	24372307	24373043	20.3277	2.66031	0.488835	5.34025	9.28191e-08	1.2743e-06
itf01g24060	Plant protein of unknown function (DUF828)	Chr01	24405935	24408363	89.3125	2.00566	0.361196	5.54677	2.90987e-08	4.74156e-07
itf01g24490	hypothetical protein	Chr01	24627402	24628023	60.7059	-2.30928	0.411833	-5.57379	2.49258e-08	4.13766e-07
itf01g24620	UDP-Glycosyltransferase superfamily protein	Chr01	24726866	24728915	493.793	-2.63428	0.41793	-6.30751	2.83563e-10	9.0866e-09
itf01g24760	CLAVATA3/ESR-RELATED	Chr01	24829896	24830716	11.7947	2.02477	0.579337	3.45397	0.00055239	0.00224374
itf01g24790	beta-6 tubulin	Chr01	24853278	24854823	360.58	2.94316	0.441849	6.67922	2.4022e-11	1.08274e-09
itf01g24820	cytochrome P450, family 98, subfamily A, polypeptide	Chr01	24868287	24876585	190.853	3.70644	0.479865	7.60076	2.94391e-14	3.27562e-12
itf01g25000	Serine hydrolase (FSH1) domain containing protein	Chr01	25018212	25020199	18.1723	2.18512	0.53426	4.03328	5.5003e-05	0.000312541
itf01g25370	basic helix-loop-helix (bHLH) DNA-binding superfamily protein	Chr01	25243362	25246323	36.1116	-2.75952	0.544164	-5.01512	5.29993e-07	5.68269e-06
itf01g25550	phytochrome kinase substrate	Chr01	25372832	25374609	17.303	2.02057	0.498615	4.01398	5.97033e-05	0.000335419
itf01g25860	expansin A10	Chr01	25601663	25604834	108.037	4.53355	0.601851	7.43108	1.07714e-13	1.04161e-11
itf01g25900	NAC-like, activated by AP3/PI	Chr01	25647099	25648910	716.155	-4.07569	0.516233	-7.87124	3.51147e-15	4.91477e-13
itf01g25980	Protein of unknown function (DUF1336)	Chr01	25695671	25699148	554.883	-2.64546	0.424348	-6.22857	4.70722e-10	1.39088e-08
itf01g26070	nodulin-related protein	Chr01	25755479	25756824	1391.95	-2.15159	0.414715	-5.19048	2.09749e-07	2.57281e-06
itf01g26160	beta glucosidase	Chr01	25817368	25822077	2.69906	2.55855	0.738638	3.09142	0.00199199	0.00666245
itf01g26170	beta glucosidase	Chr01	25822958	25827662	361.223	-2.09747	0.435653	-4.82485	1.40106e-06	1.32181e-05
itf01g26180	beta glucosidase	Chr01	25832818	25838474	236.847	-2.87709	0.319423	-8.99289	2.40808e-19	1.0673e-16
itf01g26350	UDP-Glycosyltransferase superfamily protein	Chr01	25916593	25918075	2.06134	-3.19159	0.746639	-3.83715	0.00012447	0.00062678
itf01g26380	Major facilitator superfamily protein	Chr01	25930051	25932724	336.593	3.63272	0.406105	8.9051	5.33375e-19	2.18216e-16
itf01g26430	conserved hypothetical protein	Chr01	25967126	25968140	153.06	2.63871	0.487864	5.39985	6.66953e-08	9.64977e-07
itf01g26470	coenzyme F420 hydrogenase family / dehydrogenase, beta subunit family	Chr01	26019474	26024351	56.0653	2.0762	0.411307	5.02766	4.96496e-07	5.38911e-06
itf01g26810	Protein kinase superfamily protein	Chr01	26258993	26267287	276.923	2.07416	0.324016	6.39612	1.59371e-10	5.55458e-09
itf01g26840	pleiotropic drug resistance	Chr01	26276637	26284332	6261.3	-3.59658	0.417567	-8.63948	5.64708e-18	1.76674e-15
itf01g26900	PHYTOCYSTATIN	Chr01	26328371	26328788	5.06705	-2.74361	0.709567	-3.44855	0.000563606	0.00228615
itf01g26980	Putative membrane lipoprotein	Chr01	26365749	26366106	34.3306	2.09773	0.409555	5.08679	3.64166e-07	4.1187e-06
itf01g27340	conserved hypothetical protein	Chr01	26582770	26588657	14.2475	2.67166	0.496176	5.28144	1.28171e-07	1.67656e-06
itf01g27410	chloroplast RNA binding	Chr01	26621944	26625518	14.8965	-2.348	0.501541	-4.54135	5.58942e-06	4.36021e-05
itf01g27490	pfkB-like carbohydrate kinase family protein	Chr01	26692785	26695738	7904.76	2.2165	0.275515	8.04539	8.59705e-16	1.40259e-13
itf01g27710	conserved hypothetical protein	Chr01	26805091	26808625	296.798	-3.42621	0.419372	-8.1646	3.22514e-16	6.30633e-14
itf01g27890	UDP-Glycosyltransferase superfamily protein	Chr01	26928934	26930401	42.4929	-3.21846	0.530656	-5.95276	2.6366e-09	6.17753e-08
itf01g28040	formin homology	Chr01	27022140	27026032	461.635	2.24025	0.400036	5.59902	2.15562e-08	3.65123e-07
itf01g28080	Uridine diphosphate glycosyltransferase 74E2	Chr01	27041619	27043412	4.56686	-2.68081	0.70408	-3.22597	0.00125548	0.00452642
itf01g28090	Uridine diphosphate glycosyltransferase 74E2	Chr01	27044449	27046688	24.7963	-2.98296	0.647514	-4.30373	1.67946e-05	0.000112329
itf01g28160	Zinc-binding dehydrogenase family protein	Chr01	27093041	27095276	89.1299	3.28691	0.640463	5.15148	2.58438e-07	3.08606e-06
itf01g28370	indole-3-acetate beta-D-glucosyltransferase	Chr01	27203976	27204564	43.4138	-4.61698	0.604861	-7.09131	1.32852e-12	9.01258e-11
itf01g28670	rapid alkalinization factor	Chr01	27377585	27378368	1328.76	2.10895	0.398566	5.28127	1.28291e-07	1.67731e-06
itf01g28680	nodulin MtN21 /EamA-like transporter family protein	Chr01	27387871	27389603	134.265	2.1619	0.436548	4.96464	6.88269e-07	7.12462e-06
itf01g28870	Galactose oxidase/kelch repeat superfamily protein	Chr01	27519726	27526135	157.387	2.3865	0.285589	8.3412	7.35393e-17	1.70055e-14
itf01g29250	starch synthase	Chr01	27774043	27786340	421.868	2.92892	0.293446	9.96889	2.08543e-23	2.52081e-20
itf01g29560	amino acid transporter	Chr01	28051834	28053964	5.07995	2.45699	0.696069	3.31432	0.000918648	0.00345637
itf01g29900	MAP kinase substrate	Chr01	28384852	28386221	87.24	-2.01239	0.454043	-4.42727	9.54347e-06	6.93983e-05
itf01g29950	Glycolipid transfer protein (GLTP) family protein	Chr01	28412856	28414639	192.891	-3.97034	0.573257	-6.96522	3.27883e-12	1.96382e-10
itf01g29960	pathogenesis-related family protein	Chr01	28415199	28416992	1.69128	-2.5067	0.794414	-3.02255	0.00250659	0.00810427
itf01g30010	Plant stearoyl-acyl-carrier-protein desaturase family protein	Chr01	28442189	28443772	934.784	2.17768	0.585288	3.71431	0.000203762	0.000956514
itf01g30180	nodulin MtN21 /EamA-like transporter family protein	Chr01	28567627	28570062	39.7476	2.22756	0.675127	3.24787	0.00116271	0.00424026
itf01g30320	conserved hypothetical protein	Chr01	28725093	28726365	451.215	-2.52273	0.446587	-5.66924	1.43431e-08	2.60537e-07
itf01g30350	HSP20-like chaperones superfamily protein	Chr01	28782706	28783909	34.5493	-2.0919	0.483134	-4.31081	1.62655e-05	0.000109257
itf01g30420	ABA/WDS induced protein domain containing protein	Chr01	28820344	28821765	2952.68	-2.94628	0.522478	-5.65735	1.53729e-08	2.75294e-07
itf01g30430	cellulose synthase A2	Chr01	28832794	28840568	887.416	2.65873	0.546828	4.86475	1.14603e-06	1.10904e-05
itf01g30450	Leucine-rich repeat receptor-like protein kinase family protein	Chr01	28843244	28846213	3.677	-3.19707	0.732971	-3.83164	0.000127291	0.000638929
itf01g30480	Integrase-type DNA-binding superfamily protein	Chr01	28880404	28882498	163.154	-3.87686	0.64435	-6.09941	1.0646e-09	2.83962e-08
itf01g30840	Laccase/Diphenol oxidase family protein	Chr01	29096943	29099760	17.4965	-3.26085	0.789753	-3.97749	6.96453e-05	0.000382819
itf01g31050	electron carriers;protein disulfide oxidoreductases	Chr01	29199131	29204406	24.7905	2.31315	0.544287	4.21307	2.51928e-05	0.000158982
itf01g31060	RING-H2 finger A3A	Chr01	29208160	29209101	484.895	-2.52059	0.438146	-5.78296	7.33985e-09	1.48772e-07
itf01g31160	Protein of unknown function (DUF581)	Chr01	29271641	29272790	141.165	3.50692	0.422251	8.27428	1.29232e-16	2.74934e-14
itf01g31270	trehalose-6-phosphate phosphatase	Chr01	29370785	29373236	452.565	-2.51179	0.563542	-4.50706	6.57306e-06	5.01859e-05
itf01g31490	hypothetical protein	Chr01	29498728	29500755	2003.7	-3.94934	0.594005	-6.73712	1.61555e-11	7.61742e-10
itf01g31500	hypothetical protein	Chr01	29502633	29504026	1547.01	-2.12995	0.419895	-5.07484	3.87822e-07	4.35162e-06
itf01g31570	conserved hypothetical protein	Chr01	29554917	29555943	321.467	-2.12127	0.378552	-5.61466	1.96944e-08	3.39424e-07
itf01g31600	ascorbate peroxidase	Chr01	29572019	29575638	23.2125	2.62246	0.622177	4.1517	3.30017e-05	0.000201426
itf01g31790	RNA-binding (RRM/RBD/RNP motifs) family protein	Chr01	29665607	29670282	87.3613	-2.89357	0.480537	-5.99354	2.05319e-09	5.02767e-08
itf01g31930	purine permease	Chr01	29735859	29737952	95.0935	-4.2129	0.445333	-9.28856	1.56389e-20	1.09444e-17
itf01g31940	purine permease	Chr01	29742645	29745125	47.133	-2.39117	0.477323	-4.98179	6.29974e-07	6.59563e-06
itf01g31990	Serine hydrolase (FSH1) domain containing protein	Chr01	29765006	29767156	6.87795	-2.15406	0.627705	-3.22351	0.0012663	0.00455926
itf01g32620	Zinc finger (C3HC4-type RING finger) family protein	Chr01	30209322	30212560	770.672	-2.47815	0.412772	-6.00494	1.91406e-09	4.74376e-08
itf01g32740	WWE protein-protein interaction domain protein family	Chr01	30306699	30310651	24.2212	-2.31894	0.562809	-3.8319	0.000127156	0.000638372
itf01g32840	KNOTTED-like from Arabidopsis thaliana	Chr01	30359538	30365374	758.386	3.82662	0.580658	6.5488	5.80031e-11	2.34776e-09
itf01g32870	S-locus lectin protein kinase family protein	Chr01	30387755	30390883	40.5796	2.3083	0.670901	3.52953	0.000416306	0.00175811
itf01g32940	growth-regulating factor	Chr01	30445657	30448841	36.5338	2.12693	0.465313	4.55074	5.34582e-06	4.19355e-05
itf01g32960	hypothetical protein	Chr01	30464488	30465784	32.4917	3.61186	0.596247	5.92072	3.20527e-09	7.36077e-08
itf01g33030	conserved hypothetical protein	Chr01	30497009	30498513	637.474	-2.01304	0.372128	-5.41183	6.23824e-08	9.10502e-07
itf01g33070	conserved hypothetical protein	Chr01	30531224	30532785	68.6484	2.61371	0.601754	4.22643	2.37425e-05	0.000151085
itf01g33100	ZCF37	Chr01	30547341	30548266	59.9403	-2.51551	0.509251	-4.92056	8.62986e-07	8.67652e-06
itf01g33240	cytochrome P450, family 81, subfamily F, polypeptide	Chr01	30623414	30625861	689.275	-2.31548	0.217352	-10.6525	1.69805e-26	4.10511e-23
itf01g33250	cytochrome P450, family 81, subfamily D, polypeptide	Chr01	30628125	30629813	38.4071	-2.41146	0.415936	-5.69178	1.25719e-08	2.34778e-07
itf01g33260	Leucine-rich repeat protein kinase family protein	Chr01	30633289	30636461	12.4967	-4.97081	0.691186	-6.36234	1.98702e-10	6.69719e-09
itf01g33290	cytochrome P450, family 81, subfamily K, polypeptide	Chr01	30647327	30649031	134.049	-2.15523	0.400722	-5.37759	7.54887e-08	1.07409e-06
itf01g33460	Leucine-rich repeat (LRR) family protein	Chr01	30727045	30728366	94.1838	2.95371	0.450001	6.54484	5.95591e-11	2.39615e-09
itf01g33630	heat shock transcription factor B4	Chr01	30840066	30841345	45.1528	2.70067	0.487359	5.50074	3.78203e-08	5.93016e-07
itf01g33640	Remorin family protein	Chr01	30845745	30849097	53.2362	2.57986	0.531636	4.8109	1.50254e-06	1.40595e-05
itf01g33700	Calcium-binding EF-hand family protein	Chr01	30873410	30873976	49.8797	-2.04182	0.524927	-3.84693	0.000119607	0.000605733
itf01g33730	BRI1 kinase inhibitor	Chr01	30885959	30887029	37.8754	-2.74478	0.375434	-7.20271	5.90273e-13	4.52367e-11
itf01g33840	serine carboxypeptidase-like	Chr01	30948756	30951140	25.8854	-2.12823	0.554637	-3.82435	0.000131117	0.000656027
itf01g33850	serine carboxypeptidase-like	Chr01	30952649	30955385	153.622	-2.75282	0.454474	-6.02782	1.66187e-09	4.18484e-08
itf01g33890	serine carboxypeptidase-like	Chr01	30973474	30975588	10.0032	-2.45342	0.766326	-3.68789	0.000226124	0.00104452
itf01g33910	Protein of unknown function (DUF1645)	Chr01	30996796	30998152	1634.93	-2.01271	0.38381	-5.2502	1.51932e-07	1.94805e-06
itf01g33950	myb domain protein r1	Chr01	31017415	31018551	210.291	3.74389	0.642114	5.7244	1.03799e-08	1.99589e-07
itf01g34110	Transmembrane amino acid transporter family protein	Chr01	31106572	31109652	104.615	4.05163	0.562953	7.09433	1.29975e-12	8.83997e-11
itf01g34290	cytochrome P450, family 82, subfamily C, polypeptide	Chr01	31197729	31200152	23.226	-3.40651	0.759542	-4.37653	1.20584e-05	8.44753e-05
itf01g34300	cytochrome P450, family 82, subfamily C, polypeptide	Chr01	31202649	31204836	30.6124	3.0023	0.706057	4.23268	2.30921e-05	0.000147511
itf01g34630	C2H2-like zinc finger protein	Chr01	31375519	31376808	3.07349	-3.11537	0.751841	-3.98069	6.87165e-05	0.000378417
itf01g34760	conserved hypothetical protein	Chr01	31417456	31417816	45.1852	-3.70025	0.568192	-6.00252	1.94283e-09	4.80165e-08
itf01g35030	Walls Are Thin	Chr01	31540618	31543372	387.764	2.20108	0.436659	5.06367	4.11266e-07	4.57224e-06
itf01g35200	Transcriptional factor B3 family protein / auxin-responsive factor AUX/IAA-related	Chr01	31635814	31640623	538.286	-2.60588	0.304299	-8.56238	1.10564e-17	3.1959e-15
itf01g35240	SAUR-like auxin-responsive protein family	Chr01	31662950	31664074	39.9546	4.3996	0.659385	6.29455	3.08294e-10	9.73689e-09
itf01g35250	SAUR-like auxin-responsive protein family	Chr01	31677055	31677379	21.3868	3.4804	0.745335	4.37324	1.22416e-05	8.55338e-05
itf01g35300	Auxin-responsive GH3 family protein	Chr01	31711720	31712304	3.02711	3.12702	0.800483	3.68184	0.000231554	0.0010648
itf01g35310	HVA22-like protein H (ATHVA22H)	Chr01	31713768	31716159	94.1742	4.43226	0.518333	8.42531	3.59801e-17	8.98226e-15
itf01g35440	Chaperone protein htpG family protein	Chr01	31763410	31768061	18.5939	2.21167	0.695416	3.16822	0.00153378	0.00534921
itf01g35660	Protein kinase superfamily protein	Chr01	31881409	31883471	241.917	-2.65177	0.457873	-5.80291	6.51743e-09	1.34355e-07
itf01g35760	TRICHOME BIREFRINGENCE-LIKE	Chr01	31937228	31940005	37.3526	2.29959	0.463016	4.92017	8.64676e-07	8.68366e-06
itf01g35800	NAD(P)-binding Rossmann-fold superfamily protein	Chr01	31951801	31952949	117.431	-2.11479	0.398022	-5.31111	1.08962e-07	1.4679e-06
itf01g35920	ATP citrate lyase subunit B	Chr01	32001273	32006864	263.043	2.56785	0.453308	5.67314	1.40207e-08	2.56757e-07
itf01g36020	basic chitinase	Chr01	32045799	32046105	5.11053	-4.72468	0.662348	-5.42478	5.80264e-08	8.57141e-07
itf01g36030	basic chitinase	Chr01	32047144	32047423	17.4162	-3.59189	0.69087	-4.86147	1.16517e-06	1.12592e-05
itf01g36350	Wall-associated receptor kinase galacturonan-binding domain containing protein	Chr01	32220649	32222466	80.2184	2.2722	0.565426	4.02505	5.69641e-05	0.00032272
itf02g00490	Tetraspanin family protein	Chr02	683430	687136	135.308	2.17218	0.404047	5.37331	7.73045e-08	1.09582e-06
itf02g00620	Plastid-lipid associated protein PAP / fibrillin family protein	Chr02	889401	892380	251.89	2.05973	0.280195	7.34527	2.0534e-13	1.7787e-11
itf02g01210	myb domain protein	Chr02	1754627	1756640	52.7418	-3.73215	0.45409	-8.00378	1.20658e-15	1.83981e-13
itf02g01620	related to AP2	Chr02	2416942	2418076	82.2087	-2.6838	0.585449	-4.59068	4.41799e-06	3.56888e-05
itf02g01980	calcium sensing receptor	Chr02	2814423	2819819	342.791	2.91611	0.440141	6.59738	4.18487e-11	1.75811e-09
itf02g02400	farnesylated protein	Chr02	3333778	3336291	613.766	2.17523	0.375576	5.79272	6.92547e-09	1.41451e-07
itf02g02520	AGAMOUS-like	Chr02	3434922	3440291	13.8646	-2.04318	0.642372	-3.03715	0.00238824	0.00777553	NOCR	2
itf02g02550	UDP-glucosyltransferase 73B2	Chr02	3465647	3467184	5.78455	2.41907	0.810206	3.39849	0.000677596	0.002664	NOCR	2
itf02g02730	DUF4378 domain containing protein	Chr02	3754386	3761716	54.1391	2.35382	0.447462	5.24186	1.58968e-07	2.0227e-06	NOCR	2
itf02g03080	Leucine-rich repeat protein kinase family protein	Chr02	4068304	4071451	24.3042	-3.76553	0.68575	-5.19731	2.02195e-07	2.50091e-06	NOCR	2
itf02g03170	glucuronidase	Chr02	4157682	4163315	200.176	2.2862	0.336387	6.79009	1.12061e-11	5.60157e-10	NOCR	2
itf02g03320	glucan endo-1,3-beta-glucosidase-like protein	Chr02	4268241	4273761	76.6786	3.5386	0.616936	5.70483	1.16457e-08	2.2011e-07	NOCR	2
itf02g03670	Pyridine nucleotide-disulphide oxidoreductase family protein	Chr02	4635062	4636868	25.4624	2.92355	0.663114	4.38761	1.14605e-05	8.09478e-05	NOCR	2
itf02g03680	Pyridine nucleotide-disulphide oxidoreductase family protein	Chr02	4648724	4650314	23.2443	3.00237	0.642663	4.606	4.10484e-06	3.35258e-05	NOCR	2
itf02g03690	GDSL-like Lipase/Acylhydrolase superfamily protein	Chr02	4655052	4657714	114.537	2.17508	0.526919	4.08198	4.46544e-05	0.000261735	NOCR	2
itf02g03710	expansin A15	Chr02	4714466	4716434	5.09689	-2.93983	0.727016	-3.43703	0.000588131	0.00236435	NOCR	2
itf02g03850	NAC domain containing protein	Chr02	4834674	4836796	165.308	-3.08922	0.453703	-6.79611	1.07484e-11	5.41913e-10	NOCR	2
itf02g04770	homolog of Medicago truncatula MTN3	Chr02	5937856	5939964	1916.16	-2.1285	0.457422	-4.64468	3.40606e-06	2.8412e-05	NOCR	2
itf02g05250	Kunitz family trypsin and protease inhibitor protein	Chr02	6187786	6188716	59.6652	2.99553	0.782176	4.60545	4.11568e-06	3.3604e-05	NOCR	2
itf02g05260	Trypsin and protease inhibitor domain containing protein	Chr02	6190378	6191273	55.2973	2.70539	0.789886	4.35029	1.35958e-05	9.36908e-05	NOCR	2
itf02g05470	conserved hypothetical protein	Chr02	6278385	6280183	517.268	2.51865	0.3847	6.54718	5.86338e-11	2.36272e-09	NOCR	2
itf02g05630	LETM1-like protein	Chr02	6341894	6345686	73.0172	-2.26146	0.447693	-5.04974	4.42403e-07	4.87156e-06	NOCR	2
itf02g05650	Integrase-type DNA-binding superfamily protein	Chr02	6352324	6353391	179.179	3.21772	0.416086	7.69125	1.45701e-14	1.79381e-12	NOCR	2
itf02g05680	GATA transcription factor	Chr02	6372183	6373730	43.7963	2.16621	0.494002	4.37675	1.2046e-05	8.44333e-05	NOCR	2
itf02g05800	hexokinase	Chr02	6444838	6448057	115.308	-2.07375	0.402	-5.15158	2.58301e-07	3.08581e-06	NOCR	2
itf02g05950	Leucine-rich repeat transmembrane protein kinase protein	Chr02	6503663	6507299	30.1688	-2.14261	0.68016	-3.08526	0.00203377	0.0067834	NOCR	2
itf02g06100	Pyridoxal phosphate phosphatase-related protein	Chr02	6574429	6576160	91.6756	-2.21989	0.637742	-3.38863	0.000702426	0.002747	NOCR	2
itf02g06300	indeterminate(ID)-domain	Chr02	6686898	6689986	1133.14	2.14967	0.40907	5.24572	1.55676e-07	1.98747e-06	NOCR	2
itf02g06400	ATPase E1-E2 type family protein / haloacid dehalogenase-like hydrolase family protein	Chr02	6742681	6748639	62.2423	2.04828	0.381196	5.35507	8.55239e-08	1.19081e-06	NOCR	2
itf02g06480	Protein kinase protein with adenine nucleotide alpha hydrolases-like domain	Chr02	6775032	6778662	253.964	-3.77444	0.55548	-6.73473	1.64235e-11	7.71643e-10	NOCR	2
itf02g06530	Bifunctional inhibitor/lipid-transfer protein/seed storage 2S albumin superfamily protein	Chr02	6796429	6797014	187.048	4.60455	0.680581	6.88201	5.90145e-12	3.33909e-10	NOCR	2
itf02g06670	hypothetical protein	Chr02	6888984	6889278	65.085	-2.0631	0.334817	-6.13894	8.3075e-10	2.30848e-08	NOCR	2
itf02g06870	phosphate transporter traffic facilitator1	Chr02	7018159	7020903	12.6877	2.64005	0.545145	4.72602	2.28958e-06	2.01813e-05	NOCR	2
itf02g06970	jasmonate-zim-domain protein	Chr02	7084926	7087049	3070.03	-2.08987	0.370116	-5.65665	1.54352e-08	2.76038e-07	NOCR	2
itf02g07420	Protein of unknown function (DUF1666)	Chr02	7389444	7392844	39.5286	2.86351	0.543169	5.20495	1.94054e-07	2.41595e-06	NOCR	2
itf02g07470	Ubiquitin-specific protease family C19-related protein	Chr02	7416175	7420769	40.3074	2.55444	0.559985	4.56246	5.05584e-06	4.01223e-05	NOCR	2
itf02g07540	exocyst subunit exo70 family protein G1	Chr02	7459195	7461500	11.5374	2.65989	0.566132	4.56701	4.94721e-06	3.93896e-05	NOCR	2
itf02g07600	glutamate receptor 2.9	Chr02	7487551	7488521	2.30839	-2.63358	0.697134	-3.02767	0.00246445	0.00798845	NOCR	2
itf02g08110	jasmonate-zim-domain protein	Chr02	7759646	7762058	1697.5	-2.35937	0.560294	-4.24851	2.15199e-05	0.000138734	NOCR	2
itf02g08190	Subtilase family protein	Chr02	7814855	7817365	138.617	2.90442	0.506662	5.63938	1.70659e-08	2.99166e-07	NOCR	2
itf02g08250	Subtilase family protein	Chr02	7836778	7839222	9.68506	2.09313	0.708633	2.97253	0.00295356	0.00929516	NOCR	2
itf02g08700	Seven transmembrane MLO family protein	Chr02	8112690	8116860	5.86106	-2.81282	0.687863	-3.86296	0.000112023	0.000573883	NOCR	2
itf02g08710	rhomboid protein-related	Chr02	8117257	8120602	14.179	2.25877	0.691256	3.28761	0.0010104	0.00375221	NOCR	2
itf02g08870	plasma membrane intrinsic protein 2;5	Chr02	8202357	8204201	1296.36	3.43754	0.500931	6.87494	6.20167e-12	3.47202e-10	NOCR	2
itf02g08990	RNA-binding (RRM/RBD/RNP motifs) family protein	Chr02	8257683	8260226	20.2559	3.11946	0.717006	4.14103	3.45748e-05	0.000210016	NOCR	2
itf02g09070	Calcium-dependent lipid-binding (CaLB domain) family protein	Chr02	8317020	8319016	40.4213	-2.75346	0.475657	-5.72894	1.01061e-08	1.95031e-07	NOCR	2
itf02g09080	Plant protein of unknown function (DUF946)	Chr02	8320427	8323807	176.772	-2.22057	0.364972	-6.0766	1.22757e-09	3.2099e-08	NOCR	2
itf02g09210	ammonium transporter 1;2	Chr02	8372834	8374894	39.3317	-2.63984	0.722891	-3.80744	0.000140413	0.000695476	NOCR	2
itf02g09390	conserved hypothetical protein	Chr02	8470868	8472977	26.8919	2.39396	0.60224	3.86076	0.000113036	0.000578188	NOCR	2
itf02g09410	DUF4228 domain containing protein	Chr02	8479480	8480360	7.87086	-3.72915	0.730629	-4.45378	8.43715e-06	6.24462e-05	NOCR	2
itf02g09470	Na+/H+ antiporter	Chr02	8508277	8510185	108.464	-2.06038	0.429922	-4.78441	1.71488e-06	1.57526e-05	NOCR	2
itf02g09480	Na+/H+ antiporter	Chr02	8514608	8514975	30.8416	-2.50806	0.450489	-5.48932	4.0349e-08	6.26785e-07	NOCR	2
itf02g09800	Bifunctional inhibitor/lipid-transfer protein/seed storage 2S albumin superfamily protein	Chr02	8716765	8717983	1060.92	2.3746	0.577899	4.16433	3.12272e-05	0.000192317	NOCR	2
itf02g10030	Heavy metal transport/detoxification superfamily protein	Chr02	8843658	8844444	11.0803	-2.16119	0.697741	-3.03773	0.0023837	0.00776453	NOCR	2
itf02g10160	SAUR-like auxin-responsive protein family	Chr02	8925107	8925434	84.5253	-2.77761	0.594148	-4.78455	1.71374e-06	1.57476e-05	NOCR	2
itf02g10200	Cellulase (glycosyl hydrolase family 5) domain containing protein	Chr02	8965937	8970808	125.236	-3.77348	0.545006	-6.8507	7.34912e-12	3.98035e-10	NOCR	2
itf02g10390	Pectin lyase-like superfamily protein	Chr02	9079057	9081624	119.51	2.39051	0.546478	4.3412	1.41709e-05	9.70213e-05	NOCR	2
itf02g10400	nudix hydrolase homolog	Chr02	9090641	9093361	120.022	-4.10573	0.463012	-8.75422	2.05521e-18	7.28722e-16	NOCR	2
itf02g10610	glutamate receptor 2.7	Chr02	9214929	9217911	53.5503	-2.61496	0.483523	-5.38144	7.38907e-08	1.05474e-06	NOCR	2
itf02g10630	conserved hypothetical protein	Chr02	9223681	9224526	5.12762	-2.20049	0.688305	-2.97413	0.00293824	0.00925459	NOCR	2
itf02g10730	FASCICLIN-like arabinoogalactan	Chr02	9278342	9280466	362.581	2.31748	0.479037	4.84462	1.26857e-06	1.21131e-05	NOCR	2
itf02g10810	O-Glycosyl hydrolases family 17 protein	Chr02	9328251	9330411	256.25	2.72727	0.442315	6.16529	7.03531e-10	1.98399e-08	NOCR	2
itf02g11060	cellulose synthase-like B4	Chr02	9484349	9488584	163.73	-2.70936	0.431409	-6.24399	4.26542e-10	1.27737e-08	NOCR	2
itf02g11070	cellulose synthase-like B	Chr02	9493620	9497303	356.887	-3.00668	0.539227	-5.59009	2.26958e-08	3.80977e-07	NOCR	2
itf02g11080	cellulose synthase-like B4	Chr02	9501732	9505067	11.514	-2.08982	0.621923	-3.3042	0.000952472	0.00356447	NOCR	2
itf02g11120	SLAC1 homologue	Chr02	9540282	9543044	17.478	-3.12185	0.730343	-4.05793	4.95091e-05	0.000286216	NOCR	2
itf02g11160	hypothetical protein	Chr02	9558209	9558630	6.02767	-2.43557	0.572171	-3.98187	6.8374e-05	0.000376845	NOCR	2
itf02g11190	Galactosyltransferase family protein	Chr02	9578772	9582872	51.482	2.55902	0.318438	8.00056	1.23855e-15	1.8714e-13	NOCR_NONC	2_1
itf02g11250	MATE efflux family protein	Chr02	9632706	9636587	1342.71	-2.20724	0.278437	-7.92832	2.22131e-15	3.22793e-13	NOCR_NONC	2_1
itf02g11290	glucose-6-phosphate/phosphate translocator	Chr02	9655996	9658368	291.745	7.2135	0.651369	10.2216	1.58778e-24	2.63899e-21	NOCR_NONC	2_1
itf02g11320	conserved hypothetical protein	Chr02	9666930	9668204	1.52297	2.8422	0.77488	3.48909	0.000484675	0.00200598	NOCR_NONC	2_1
itf02g11510	uclacyanin	Chr02	9755011	9755901	105.548	2.35919	0.413556	5.66815	1.44351e-08	2.61672e-07	NOCR_NONC	2_1
itf02g11620	xyloglucan endotransglucosylase/hydrolase	Chr02	9805160	9807066	463.123	2.75825	0.498945	5.52611	3.27403e-08	5.2608e-07	NOCR_NONC	2_1
itf02g11670	pinoid-binding protein	Chr02	9834700	9835266	19.0025	2.4693	0.671885	3.56144	0.000368831	0.00158352	NOCR_NONC	2_1
itf02g11830	MYB-like	Chr02	9916498	9917848	25.1882	-4.41645	0.657423	-6.13241	8.65574e-10	2.37791e-08	NOCR_NONC	2_1
itf02g12060	conserved hypothetical protein	Chr02	10048787	10051920	212.66	3.11568	0.39604	7.84977	4.16801e-15	5.67806e-13	NOCR_NONC	2_1
itf02g12160	hypothetical protein	Chr02	10124914	10125355	4.96446	-2.14189	0.763546	-3.1639	0.00155668	0.00541416	NOCR_NONC	2_1
itf02g12220	Clathrin light chain protein	Chr02	10156138	10157581	12.8821	-3.07876	0.752279	-3.91604	9.00156e-05	0.000475901	NOCR_NONC	2_1
itf02g12240	Tetraspanin family protein	Chr02	10163864	10166922	75.5138	4.71547	0.782778	5.27542	1.32453e-07	1.72663e-06	NOCR_NONC	2_1
itf02g12260	Ankyrin repeat family protein	Chr02	10169926	10172016	9.41302	-2.38882	0.665902	-3.32454	0.000885632	0.00334968	NOCR_NONC	2_1
itf02g12360	hypothetical protein	Chr02	10237394	10238163	303.2	-2.02773	0.309945	-6.54727	5.85968e-11	2.36272e-09	NOCR_NONC	2_1
itf02g12390	conserved hypothetical protein	Chr02	10252624	10253614	116.906	2.2191	0.548489	4.00172	6.28847e-05	0.000350806	NOCR_NONC	2_1
itf02g12500	squamosa promoter binding protein-like	Chr02	10324329	10328844	13.7441	3.21763	0.645362	4.78632	1.69865e-06	1.5636e-05	NOCR_NONC	2_1
itf02g12510	squamosa promoter binding protein-like	Chr02	10333169	10336464	1.8261	3.01241	0.795306	3.31597	0.000913242	0.00343992	NOCR_NONC	2_1
itf02g12750	C2H2 and C2HC zinc fingers superfamily protein	Chr02	10486958	10489596	59.2834	-2.1841	0.37421	-5.81184	6.17913e-09	1.28276e-07	NOCR_NONC	2_1
itf02g12770	Thioredoxin superfamily protein	Chr02	10502755	10503737	17.1824	-2.01366	0.459547	-4.28855	1.79846e-05	0.000119387	NOCR_NONC	2_1
itf02g12860	O-methyltransferase family protein	Chr02	10553309	10554056	7.27831	-5.05068	0.612185	-5.84586	5.03966e-09	1.07733e-07	NOCR_NONC	2_1
itf02g12890	O-methyltransferase family protein	Chr02	10565300	10567287	975.072	-5.36663	0.547715	-9.9186	3.45563e-23	3.99546e-20	NOCR_NONC	2_1
itf02g12900	O-methyltransferase family protein	Chr02	10576067	10577458	26.8306	-3.60141	0.567824	-6.11558	9.62065e-10	2.61063e-08	NOCR_NONC	2_1
itf02g12910	O-methyltransferase family protein	Chr02	10578873	10581499	25.6769	-3.01926	0.629167	-4.57433	4.77752e-06	3.82687e-05	NOCR_NONC	2_1
itf02g12920	O-methyltransferase family protein	Chr02	10582821	10584549	162.127	-2.96703	0.597411	-5.04149	4.61929e-07	5.05726e-06	NOCR_NONC	2_1
itf02g13050	HXXXD-type acyl-transferase family protein	Chr02	10640042	10642433	24.0622	3.75276	0.594598	6.10701	1.01514e-09	2.72958e-08	NOCR_NONC	2_1
itf02g13100	TRICHOME BIREFRINGENCE-LIKE	Chr02	10652012	10656102	264.869	-2.07449	0.370656	-5.61029	2.0199e-08	3.45213e-07	NOCR_NONC	2_1
itf02g13130	basic helix-loop-helix (bHLH) DNA-binding superfamily protein	Chr02	10670928	10672583	319.352	-3.1865	0.39509	-8.05351	8.04517e-16	1.32885e-13	NOCR_NONC	2_1
itf02g13190	Protein of unknown function (DUF640)	Chr02	10724307	10727013	34.7071	3.37521	0.709715	4.59365	4.35553e-06	3.52592e-05	NOCR_NONC	2_1
itf02g13550	2-oxoglutarate (2OG) and Fe(II)-dependent oxygenase superfamily protein	Chr02	10928161	10930134	70.7276	-3.15992	0.586434	-5.34899	8.84448e-08	1.22501e-06	NOCR_NONC	2_1
itf02g13790	phy rapidly regulated	Chr02	11103648	11104518	44.4954	3.1035	0.682738	4.46428	8.03399e-06	5.98245e-05	NOCR	2
itf02g13930	ADP glucose pyrophosphorylase	Chr02	11234611	11238382	908.324	4.32279	0.5011	8.57763	9.68438e-18	2.86152e-15	NOCR	2
itf02g13940	hypothetical protein	Chr02	11238687	11239004	7.20606	-2.57709	0.683802	-3.66873	0.000243755	0.0011132	NOCR	2
itf02g14250	Calcium-dependent lipid-binding (CaLB domain) family protein	Chr02	11437198	11443161	4469.47	-2.15558	0.361429	-5.97108	2.35682e-09	5.65658e-08
itf02g14430	TRICHOME BIREFRINGENCE-LIKE	Chr02	11570261	11574116	38.3002	-2.03475	0.391943	-5.14946	2.61238e-07	3.1125e-06
itf02g14440	TRICHOME BIREFRINGENCE-LIKE	Chr02	11574402	11580129	277.369	-2.89931	0.258962	-11.1781	5.22041e-29	2.77653e-25
itf02g14490	gamma-glutamyl hydrolase	Chr02	11626296	11628931	36.4789	4.21864	0.633983	6.39825	1.57171e-10	5.50679e-09
itf02g14500	gamma-glutamyl hydrolase	Chr02	11659932	11663296	26.5823	3.05304	0.680118	4.2849	1.82821e-05	0.000121059
itf02g14640	Protein of unknown function (DUF640)	Chr02	11748493	11749093	4.6818	2.86194	0.809596	3.36082	0.000777124	0.00299638
itf02g14670	cytochrome BC1 synthesis	Chr02	11769763	11771598	510.132	-2.54574	0.464775	-5.48931	4.03511e-08	6.26785e-07
itf02g14930	Basic-leucine zipper (bZIP) transcription factor family protein	Chr02	11945727	11948846	37.1358	2.05743	0.681781	3.03325	0.00241936	0.00785569
itf02g15160	squamosa promoter binding protein-like	Chr02	12095338	12096497	126.534	3.63945	0.417344	8.67463	4.14892e-18	1.34551e-15
itf02g15230	early nodulin-like protein	Chr02	12155769	12157925	3793.62	-2.2824	0.339103	-6.73231	1.66988e-11	7.80441e-10
itf02g15260	Core-2/I-branching beta-1,6-N-acetylglucosaminyltransferase family protein	Chr02	12182761	12185917	257.17	-2.10714	0.41305	-5.11858	3.07839e-07	3.57208e-06
itf02g15450	NAC (No Apical Meristem) domain transcriptional regulator superfamily protein	Chr02	12362469	12364218	809.768	-2.46895	0.451715	-5.45207	4.97862e-08	7.48425e-07
itf02g15500	HAL2-like	Chr02	12403061	12405998	64.2113	2.7806	0.417963	6.62154	3.55464e-11	1.52712e-09
itf02g15520	Late embryogenesis abundant (LEA) protein-related	Chr02	12415290	12416513	4.3812	-2.15392	0.690059	-3.12761	0.00176236	0.00601084
itf02g15710	B-box type zinc finger family protein	Chr02	12503528	12504316	152.58	2.54404	0.446836	5.66565	1.46469e-08	2.6479e-07
itf02g16130	thiazole biosynthetic enzyme, chloroplast (ARA6) (THI1) (THI4)	Chr02	12823586	12825593	828.61	5.80018	0.614785	9.26307	1.98639e-20	1.35446e-17
itf02g16170	glucose 6-phosphate/phosphate translocator	Chr02	12857584	12862078	3034.52	2.32395	0.253381	9.17023	4.72032e-20	2.91925e-17
itf02g16350	endoribonuclease L-PSP family protein	Chr02	12986467	12988929	103.554	2.99248	0.504899	5.87836	4.14353e-09	9.17476e-08
itf02g16620	Na+/H+ (sodium hydrogen) exchanger	Chr02	13158370	13161667	7.92583	2.66295	0.56829	4.4513	8.53516e-06	6.30838e-05
itf02g16710	tornado	Chr02	13204643	13206035	33.6056	2.00903	0.45997	4.34833	1.37177e-05	9.44689e-05
itf02g16810	multidrug resistance-associated protein	Chr02	13271392	13277430	126.032	-2.03187	0.453804	-4.47037	7.80853e-06	5.83293e-05
itf02g16830	multidrug resistance-associated protein	Chr02	13289501	13294989	49.699	-2.30663	0.503901	-4.55364	5.27254e-06	4.14708e-05
itf02g16850	glutamate receptor	Chr02	13306204	13311711	142.783	-2.3524	0.435346	-5.41818	6.02096e-08	8.83152e-07
itf02g16880	senescence-associated gene	Chr02	13341002	13342595	113.982	-4.29387	0.645924	-6.54336	6.01511e-11	2.41267e-09
itf02g17170	RING/U-box superfamily protein	Chr02	13533288	13535258	512.259	-2.66063	0.355269	-7.4811	7.37004e-14	7.3681e-12
itf02g17270	uridine kinase-like	Chr02	13609515	13616186	77.9632	2.96574	0.495126	5.96679	2.4197e-09	5.7565e-08
itf02g17590	P-loop containing nucleoside triphosphate hydrolases superfamily protein	Chr02	13810350	13813218	12.8	2.47838	0.54528	4.44198	8.91332e-06	6.55501e-05
itf02g17600	P-loop containing nucleoside triphosphate hydrolases superfamily protein	Chr02	13813936	13814365	5.52537	2.99741	0.684737	4.04968	5.12883e-05	0.000295155
itf02g17730	SAUR-like auxin-responsive protein family	Chr02	13894891	13895930	37.2233	2.96748	0.582468	5.06889	4.00136e-07	4.4653e-06
itf02g17970	nitrate transmembrane transporters	Chr02	14108412	14110327	151.491	-3.59048	0.702711	-5.24357	1.57498e-07	2.00495e-06
itf02g17980	nitrate transmembrane transporters	Chr02	14114294	14115900	10.7094	-3.39795	0.750532	-4.62914	3.67186e-06	3.03814e-05
itf02g17990	nitrate transmembrane transporters	Chr02	14119864	14121071	45.3882	-4.01019	0.727825	-5.18701	2.137e-07	2.61163e-06
itf02g18030	hypothetical protein	Chr02	14156174	14158305	24.5953	2.49374	0.330437	7.43218	1.06826e-13	1.0368e-11
itf02g18040	Leucine-rich repeat protein kinase family protein	Chr02	14159321	14161358	59.2603	-2.543	0.536231	-4.75513	1.98316e-06	1.78413e-05
itf02g18120	Pectin lyase-like superfamily protein	Chr02	14223146	14225728	614.319	2.69403	0.530851	5.10501	3.30774e-07	3.79406e-06
itf02g18500	Leucine-rich repeat transmembrane protein kinase	Chr02	14575392	14578320	49.1542	-2.98364	0.462006	-6.3486	2.17287e-10	7.23193e-09
itf02g19100	aldehyde dehydrogenase 2B4	Chr02	15210657	15215359	197.685	-3.3954	0.525778	-6.42557	1.31377e-10	4.75334e-09
itf02g19130	alpha/beta-Hydrolases superfamily protein	Chr02	15237224	15241047	11.1702	2.16126	0.634916	3.32504	0.000884062	0.00334422
itf02g19160	alpha/beta-Hydrolases superfamily protein	Chr02	15247898	15254694	49.9953	2.37664	0.652314	3.51943	0.00043247	0.00181944
itf02g19300	Calmodulin binding protein-like	Chr02	15375123	15379295	249.548	-2.17358	0.415041	-5.25003	1.52076e-07	1.94805e-06
itf02g19350	Gibberellin-regulated family protein	Chr02	15414673	15419075	20.0019	3.45113	0.676492	4.80089	1.57961e-06	1.4677e-05
itf02g19780	Major facilitator superfamily protein	Chr02	15790143	15796101	127.758	-2.49646	0.468491	-5.33619	9.49209e-08	1.29581e-06
itf02g20190	WRKY DNA-binding protein	Chr02	16315442	16321048	12.5859	-2.93463	0.767124	-3.70732	0.000209464	0.000978794
itf02g20300	SPFH/Band 7/PHB domain-containing membrane-associated protein family	Chr02	16403310	16404851	15.5807	2.91825	0.641189	4.45291	8.47137e-06	6.26774e-05
itf02g20330	hypothetical protein	Chr02	16422097	16422854	2.17602	-2.41264	0.7312	-2.99429	0.00275086	0.00875567
itf02g21090	EamA-like transporter family domain containing protein	Chr02	17591806	17595374	244.677	-3.93982	0.416187	-9.4082	5.04717e-21	4.06725e-18
itf02g21160	Calmodulin binding protein-like	Chr02	17762057	17766699	985.602	-2.83673	0.5701	-5.10577	3.29446e-07	3.78443e-06
itf02g21500	hypothetical protein	Chr02	18299694	18300481	1059.21	-3.02839	0.450371	-6.72972	1.69986e-11	7.91671e-10
itf02g21660	receptor-like kinase	Chr02	18484081	18485464	10.987	2.11294	0.552273	3.74867	0.000177775	0.000853045
itf02g21760	Galactose mutarotase-like superfamily protein	Chr02	18596182	18598093	128.437	4.14146	0.517964	7.93507	2.10382e-15	3.09099e-13
itf02g23100	receptor-like kinase	Chr02	20718600	20720437	45.0153	-2.67469	0.472578	-5.60544	2.07721e-08	3.53193e-07
itf02g23210	conserved hypothetical protein	Chr02	20789681	20793079	3.59794	2.6705	0.71995	3.8787	0.000105016	0.00054301
itf02g23800	RING/U-box superfamily protein	Chr02	21451457	21453507	80.3673	-2.49057	0.589557	-4.31038	1.62976e-05	0.000109417
itf02g24230	hypothetical protein	Chr02	21937666	21938161	10.1276	-2.71866	0.67918	-3.64237	0.000270144	0.00121488
itf02g24430	hypothetical protein	Chr02	22356123	22357102	227.222	-2.21956	0.482349	-4.63048	3.64812e-06	3.02037e-05
itf02g24910	WRKY DNA-binding protein	Chr02	22932993	22935142	771.053	-3.09706	0.421311	-7.37327	1.66488e-13	1.50081e-11
itf02g25120	receptor like protein	Chr02	23155006	23160741	254.397	-2.02166	0.303609	-6.64452	3.04198e-11	1.33491e-09
itf02g25360	adenine phosphoribosyltransferase	Chr02	23495851	23498420	76.9066	2.47816	0.646229	3.81474	0.000136327	0.000678523
itf02g25880	Aquaporin-like superfamily protein	Chr02	23907822	23908885	7.73022	-2.94939	0.687014	-3.92024	8.8462e-05	0.000469087
itf02g26380	proline-rich family protein	Chr02	24332020	24332976	56.5602	2.37277	0.516857	4.55291	5.2909e-06	4.15783e-05
itf02g26440	2-oxoglutarate (2OG) and Fe(II)-dependent oxygenase superfamily protein	Chr02	24391159	24393072	723.03	-2.26156	0.770287	-3.98589	6.72282e-05	0.000371221
itf02g27030	Embryo-specific protein 3, (ATS3)	Chr02	24923046	24924585	174.489	3.92137	0.535481	7.30599	2.75225e-13	2.30159e-11
itf02g27350	Sterile alpha motif (SAM) domain-containing protein	Chr02	25305524	25306336	79.0562	2.98818	0.524362	5.66924	1.4343e-08	2.60537e-07
itf02g28590	Bifunctional inhibitor/lipid-transfer protein/seed storage 2S albumin superfamily protein	Chr02	27072126	27072729	27.815	2.68722	0.54347	4.88566	1.03085e-06	1.00794e-05
itf03g00260	hypothetical protein	Chr03	116394	119564	11.7459	-2.15238	0.455677	-4.58235	4.59782e-06	3.70066e-05	NONC_NOCR	2_3
itf03g00310	lysine histidine transporter	Chr03	131478	134122	37.3513	-3.10894	0.639005	-4.77352	1.81031e-06	1.65095e-05	NONC_NOCR	2_3
itf03g00370	Domain of unknown function (DUF23)	Chr03	168640	171061	222.769	-2.01577	0.38155	-5.28198	1.27796e-07	1.67248e-06	NONC_NOCR	2_3
itf03g00390	conserved hypothetical protein	Chr03	176613	177608	173.214	-2.37461	0.440525	-5.36852	7.93875e-08	1.11997e-06	NONC_NOCR	2_3
itf03g00500	beta-1,4-N-acetylglucosaminyltransferase family protein	Chr03	219127	221886	43.1478	2.53332	0.448704	5.61338	1.98412e-08	3.40631e-07	NONC_NOCR	2_3
itf03g00790	conserved hypothetical protein	Chr03	362974	364334	46.4736	2.34197	0.510885	4.54827	5.40876e-06	4.23543e-05	NONC_NOCR	2_3
itf03g00840	UDP-Glycosyltransferase superfamily protein	Chr03	389992	392391	75.5139	-2.17758	0.404294	-5.36189	8.23558e-08	1.15878e-06	NONC_NOCR	2_3
itf03g00970	Gibberellin-regulated family protein	Chr03	449467	450624	589.975	2.95245	0.530793	5.51445	3.49864e-08	5.55459e-07	NONC_NOCR	2_3
itf03g00980	Peroxidase superfamily protein	Chr03	455540	456830	1079.48	2.71861	0.467053	5.81329	6.12585e-09	1.27468e-07	NONC_NOCR	2_3
itf03g01090	Major facilitator superfamily protein	Chr03	478135	481627	378.233	-2.79669	0.454002	-6.17457	6.63437e-10	1.87889e-08	NONC_NOCR	2_3
itf03g01450	hypothetical protein	Chr03	676500	677665	141.867	-3.23477	0.550571	-5.83885	5.25622e-09	1.11378e-07	NONC_NOCR	2_3
itf03g01650	emp24/gp25L/p24 family/GOLD family protein	Chr03	776863	779061	10.5075	2.40928	0.519471	4.51365	6.37225e-06	4.87647e-05	NONC_NOCR	2_3
itf03g01720	chorismate mutase	Chr03	819154	822148	9.93925	-2.44313	0.600567	-3.87758	0.0001055	0.000544767	NONC_NOCR	2_3
itf03g01860	alpha/beta-Hydrolases superfamily protein	Chr03	898336	901993	44.6238	4.50403	0.69643	6.18747	6.11368e-10	1.74818e-08	NONC_NOCR	2_3
itf03g02190	brassinosteroid-6-oxidase	Chr03	1081397	1085213	217.37	-2.06322	0.416528	-4.95603	7.19471e-07	7.39864e-06	NONC_NOCR	2_3
itf03g02240	K-box region and MADS-box transcription factor family protein	Chr03	1102599	1106803	77.1655	-2.42658	0.474579	-5.11044	3.21405e-07	3.70006e-06	NONC_NOCR	2_3
itf03g02410	CONSTANS-like	Chr03	1231689	1233912	8.94801	-2.42864	0.638804	-3.63745	0.000275353	0.00123403	NONC_NOCR	2_3
itf03g02460	Methylenetetrahydrofolate reductase family protein	Chr03	1255826	1259385	485.541	-2.48439	0.426625	-5.8243	5.73509e-09	1.20373e-07	NONC_NOCR	2_3
itf03g02500	TRICHOME BIREFRINGENCE-LIKE	Chr03	1276163	1278662	16.6749	-2.05843	0.459499	-4.39921	1.08643e-05	7.74365e-05	NONC_NOCR	2_3
itf03g02520	TRICHOME BIREFRINGENCE-LIKE	Chr03	1287935	1292020	116.372	2.01014	0.375076	5.34958	8.8157e-08	1.22229e-06	NONC_NOCR	2_3
itf03g02710	CAP (Cysteine-rich secretory proteins, Antigen 5, and Pathogenesis-related 1 protein) superfamily protein	Chr03	1400761	1401539	8.70484	2.0466	0.635751	3.15759	0.00159081	0.00551844	NONC_NOCR	2_3
itf03g02730	DUF4228 domain containing protein	Chr03	1408018	1408853	137.953	2.93656	0.581254	5.01868	5.20271e-07	5.59239e-06	NONC_NOCR	2_3
itf03g02760	photosystem II subunit O-2	Chr03	1419476	1421553	178.266	2.91016	0.623782	4.65142	3.29659e-06	2.76288e-05	NONC_NOCR	2_3
itf03g03190	Lipase/lipooxygenase, PLAT/LH2 family protein	Chr03	1660149	1661026	625.225	3.21963	0.445924	7.19479	6.25558e-13	4.69929e-11	NOCR_TNR	3_2
itf03g03340	RAB GTPase homolog H1D	Chr03	1771043	1780067	9.30463	2.91661	0.593629	4.59833	4.25884e-06	3.45923e-05	NOCR_TNR	3_2
itf03g03360	conserved hypothetical protein	Chr03	1782567	1786210	231.786	3.92239	0.494564	7.89518	2.89904e-15	4.07906e-13	NOCR_TNR	3_2
itf03g03510	hypothetical protein	Chr03	1887821	1888133	102.056	-3.35007	0.673607	-4.85248	1.21929e-06	1.17014e-05	NOCR_TNR	3_2
itf03g03720	MATE efflux family protein	Chr03	2059170	2060135	11.4838	-2.54894	0.598815	-4.10096	4.11433e-05	0.000243735	NOCR	3
itf03g04240	elicitor-activated gene 3-2	Chr03	2406145	2407724	717.432	-2.48089	0.429055	-5.79484	6.83868e-09	1.40001e-07	NOCR	3
itf03g04250	elicitor-activated gene 3-2	Chr03	2412161	2418574	376.677	-2.16442	0.449617	-4.83447	1.33501e-06	1.26838e-05	NOCR	3
itf03g04270	elicitor-activated gene 3-2	Chr03	2427504	2429705	3281.1	-3.03055	0.489689	-6.22541	4.80295e-10	1.41759e-08	NOCR	3
itf03g04300	elicitor-activated gene 3-2	Chr03	2440477	2442719	1889.8	-2.16997	0.482565	-4.52553	6.02442e-06	4.64774e-05	NOCR	3
itf03g04450	O-Glycosyl hydrolases family 17 protein	Chr03	2522531	2525736	68.7735	2.10771	0.410269	5.12407	2.99011e-07	3.48296e-06	NOCR	3
itf03g04630	STELAR K+ outward rectifier	Chr03	2689028	2697849	94.431	-3.07918	0.423657	-7.2254	4.9962e-13	3.95429e-11	NOCR	3
itf03g05120	glutathione S-transferase F11	Chr03	3122995	3124725	36.0684	3.19685	0.632818	4.81495	1.47239e-06	1.38113e-05	NOCR	3
itf03g05270	Transcription factor jumonji (jmjC) domain-containing protein	Chr03	3260882	3271008	113.633	2.09961	0.337991	6.20436	5.49208e-10	1.5927e-08
itf03g05340	Concanavalin A-like lectin protein kinase family protein	Chr03	3326290	3329020	316.633	-2.31769	0.350738	-6.60629	3.94073e-11	1.67139e-09
itf03g05350	Concanavalin A-like lectin protein kinase family protein	Chr03	3333811	3337431	334.531	-2.03861	0.371239	-5.49853	3.82973e-08	5.99435e-07
itf03g05420	Auxin efflux carrier family protein	Chr03	3384505	3387294	27.2605	2.96907	0.54939	5.30857	1.10491e-07	1.48173e-06
itf03g05540	tonoplast monosaccharide transporter2	Chr03	3536533	3540685	11.2195	-3.28893	0.61957	-4.90729	9.23415e-07	9.16283e-06
itf03g05640	polyadenylate-binding protein	Chr03	3623846	3625648	7.6154	2.55146	0.601427	4.02878	5.60664e-05	0.000318176
itf03g05950	Disease resistance-responsive (dirigent-like protein) family protein	Chr03	3831382	3831919	260.348	-3.92214	0.509716	-7.63115	2.32672e-14	2.71379e-12
itf03g05960	Disease resistance-responsive (dirigent-like protein) family protein	Chr03	3834468	3835381	1286.12	-3.83121	0.490792	-7.91197	2.53355e-15	3.62229e-13
itf03g06120	Calcium-dependent phosphotriesterase superfamily protein	Chr03	3973340	3976247	176.519	-3.30734	0.517099	-6.41496	1.4086e-10	5.05519e-09
itf03g06130	Calcium-dependent phosphotriesterase superfamily protein	Chr03	3978089	3978540	4.70525	-2.6138	0.658135	-3.42641	0.000611621	0.00244516
itf03g06140	Calcium-dependent phosphotriesterase superfamily protein	Chr03	3978976	3979697	10.1674	-2.20446	0.530199	-3.91915	8.88621e-05	0.000470552
itf03g06170	MATE efflux family protein	Chr03	3992536	3998733	127.356	2.94552	0.519703	5.68714	1.29181e-08	2.39948e-07
itf03g06180	basic chitinase	Chr03	4018144	4020042	440.448	-2.99436	0.653086	-4.62833	3.68627e-06	3.04816e-05
itf03g06690	ubiquitin-conjugating enzyme	Chr03	4281449	4282414	1529.82	-2.01679	0.368256	-5.4807	4.23644e-08	6.54238e-07
itf03g06740	Protein of unknown function (DUF630) ;Protein of unknown function (DUF632)	Chr03	4306217	4309445	52.4873	2.47476	0.430112	5.72695	1.02251e-08	1.97041e-07
itf03g06800	Major facilitator superfamily protein	Chr03	4350073	4352122	150.014	3.58522	0.703245	5.11583	3.1236e-07	3.61785e-06
itf03g07210	beta-galactosidase	Chr03	4690322	4696933	269.649	2.43644	0.461513	5.28573	1.25205e-07	1.64424e-06
itf03g07280	Peroxidase superfamily protein	Chr03	4752132	4754000	47.7649	-3.00059	0.60558	-4.93563	7.98943e-07	8.13411e-06
itf03g07290	conserved hypothetical protein	Chr03	4756082	4761521	7.68382	3.0383	0.501285	5.67541	1.38354e-08	2.5413e-07
itf03g07360	S-adenosyl-L-methionine-dependent methyltransferases superfamily protein	Chr03	4799135	4801409	431.928	-2.36586	0.401602	-5.88445	3.9937e-09	8.89486e-08
itf03g07400	galactinol synthase	Chr03	4830696	4831917	98.4128	-3.98599	0.642305	-6.09914	1.0664e-09	2.84155e-08
itf03g07410	galactinol synthase	Chr03	4834869	4836430	844.304	-4.46754	0.529297	-8.46324	2.60058e-17	6.91573e-15
itf03g07440	conserved hypothetical protein	Chr03	4852445	4852943	19.2233	-2.12495	0.586758	-3.57293	0.000353011	0.00152793
itf03g07560	homeobox protein	Chr03	4948778	4950425	2.05268	3.0143	0.798559	3.2786	0.00104325	0.00385642
itf03g07700	roline-rich extensin-like receptor kinase	Chr03	5076750	5079767	14.0028	-2.0008	0.493142	-3.97534	7.02782e-05	0.00038574
itf03g07890	conserved hypothetical protein	Chr03	5245029	5248065	43.4929	2.01753	0.575409	3.54609	0.000390997	0.00166685
itf03g08040	alpha/beta-Hydrolases superfamily protein	Chr03	5355457	5359072	9.25305	3.49335	0.593883	5.40231	6.57881e-08	9.56012e-07
itf03g08160	conserved hypothetical protein	Chr03	5425662	5426724	1185.11	-2.00424	0.270268	-7.41864	1.18329e-13	1.11586e-11
itf03g08590	AGAMOUS-like	Chr03	5739721	5743253	75.868	2.09922	0.574182	3.62301	0.000291189	0.00129383
itf03g08680	beta HLH protein	Chr03	5807233	5809170	916.92	3.3734	0.512104	6.58048	4.68944e-11	1.95127e-09
itf03g08800	basic helix-loop-helix (bHLH) DNA-binding superfamily protein	Chr03	5925799	5928446	3.63126	-2.74808	0.78246	-3.51013	0.00044788	0.00187537
itf03g09980	conserved hypothetical protein	Chr03	7328290	7329660	296.819	-2.12324	0.436228	-4.89818	9.67277e-07	9.54464e-06
itf03g10660	serine/threonine protein kinase	Chr03	8412750	8414034	4.88786	-3.66666	0.676297	-4.60981	4.03034e-06	3.29984e-05
itf03g11330	inflorescence deficient in abscission (IDA)-like	Chr03	9204698	9205424	13.3605	2.88252	0.566926	4.90444	9.36957e-07	9.27989e-06
itf03g12340	isoamylase	Chr03	10612191	10621743	457.514	2.01404	0.254219	7.91915	2.39135e-15	3.45616e-13
itf03g12410	Protein of unknown function (DUF630 and DUF632)	Chr03	10704628	10705744	19.4145	2.22421	0.567511	3.82058	0.000133138	0.000665012
itf03g12450	heavy metal atpase	Chr03	10781663	10793200	319.039	-2.51135	0.440033	-5.70757	1.146e-08	2.17127e-07
itf03g12460	heavy metal atpase	Chr03	10791245	10791558	15.9935	-2.26014	0.541717	-4.06423	4.81916e-05	0.00028
itf03g12480	Regulator of chromosome condensation (RCC1) family with FYVE zinc finger domain	Chr03	10812228	10820478	21.6122	2.05376	0.362612	5.6156	1.95887e-08	3.38261e-07
itf03g12560	cycloartenol synthase	Chr03	10977982	10984423	8.25481	-2.49094	0.572454	-4.11011	3.95463e-05	0.000235269
itf03g12660	Heavy metal transport/detoxification superfamily protein	Chr03	11069031	11070176	11.5775	2.77623	0.553592	4.64698	3.36824e-06	2.81406e-05
itf03g12810	BCL-2-associated athanogene	Chr03	11132490	11134711	518.985	2.60219	0.419277	6.20692	5.40337e-10	1.57903e-08
itf03g12860	TraB family protein	Chr03	11156726	11158924	13.7841	2.2303	0.693071	3.21229	0.00131682	0.00471309
itf03g13070	ERECTA-like	Chr03	11279979	11286463	40.7114	4.25672	0.695078	5.93665	2.90903e-09	6.74453e-08
itf03g13110	hydroxyproline-rich glycoprotein family protein	Chr03	11293320	11294710	10.276	-2.03434	0.649675	-3.04489	0.00232764	0.00760711
itf03g13150	Protein of unknown function (DUF1442)	Chr03	11315288	11316360	70.4441	2.74449	0.43267	6.3138	2.72269e-10	8.78696e-09
itf03g13190	EXORDIUM like	Chr03	11338277	11339633	522.224	3.08219	0.496508	6.22204	4.9074e-10	1.44681e-08
itf03g13220	myb domain protein	Chr03	11357315	11358636	7.13314	2.02271	0.639818	3.10117	0.00192756	0.00648198
itf03g13250	Plant invertase/pectin methylesterase inhibitor superfamily protein	Chr03	11376157	11377164	569.056	3.92218	0.666045	5.84063	5.20045e-09	1.10284e-07
itf03g13380	phosphate starvation-induced gene	Chr03	11444206	11447342	1195.61	-2.38705	0.571021	-4.18256	2.88245e-05	0.000178928
itf03g13530	ethylene responsive element binding factor	Chr03	11527884	11529041	1466.75	-3.4595	0.503343	-6.90895	4.88249e-12	2.84114e-10
itf03g13640	Major facilitator superfamily protein	Chr03	11590046	11591725	3.46888	-2.59916	0.690283	-3.83644	0.000124829	0.000628233
itf03g13650	Major facilitator superfamily protein	Chr03	11592519	11594282	27.8789	-2.23661	0.435949	-5.07458	3.88353e-07	4.35474e-06
itf03g13780	glutamate dehydrogenase	Chr03	11671770	11674968	60.451	-2.19831	0.467714	-4.68838	2.75371e-06	2.363e-05
itf03g13970	serine/threonine protein kinase	Chr03	11753265	11755069	14.9617	-2.50417	0.460169	-5.30402	1.13282e-07	1.5123e-06
itf03g14000	Protein of unknown function (DUF3133)	Chr03	11772915	11777283	1214.75	-2.01914	0.383975	-5.26307	1.41666e-07	1.82614e-06
itf03g14040	WRKY DNA-binding protein	Chr03	11800890	11802786	20.6911	-2.04522	0.665134	-3.1373	0.0017051	0.00584855
itf03g14120	expansin A10	Chr03	11847444	11849325	382.249	3.32532	0.562031	5.84268	5.13674e-09	1.09369e-07
itf03g14290	conserved hypothetical protein	Chr03	11945758	11946753	16.9357	2.28428	0.744543	3.11747	0.00182413	0.00619211
itf03g14300	Protein of unknown function (DUF567)	Chr03	11955910	11956745	31.1805	-3.28663	0.713519	-4.52104	6.1537e-06	4.73237e-05
itf03g14430	PYR1-like	Chr03	12024769	12025822	117.536	-3.18564	0.555257	-5.68843	1.28213e-08	2.38628e-07
itf03g14470	Lateral organ boundaries (LOB) domain family protein	Chr03	12047672	12049927	5.55703	2.73035	0.72427	3.73097	0.000190743	0.000904824
itf03g14530	Protein kinase family protein	Chr03	12083500	12086686	258.118	-2.00594	0.366303	-5.47268	4.43279e-08	6.78258e-07
itf03g14710	fatty acid desaturase	Chr03	12205136	12208258	195.263	-2.69943	0.560633	-4.81473	1.47401e-06	1.38217e-05
itf03g14730	2-oxoglutarate (2OG) and Fe(II)-dependent oxygenase superfamily protein	Chr03	12228055	12230768	26.2449	-2.57611	0.747346	-3.71997	0.000199246	0.000938961
itf03g14780	CRINKLY4 related	Chr03	12263568	12266788	79.2391	-2.37341	0.528369	-4.51787	6.24657e-06	4.78994e-05
itf03g14790	phospholipase C	Chr03	12266781	12274303	187.024	-3.51571	0.497362	-7.04201	1.89486e-12	1.22306e-10
itf03g14830	Alpha/beta hydrolase related protein	Chr03	12287373	12289973	1526.9	-2.44557	0.361913	-6.76732	1.31185e-11	6.42469e-10
itf03g14900	anthranilate synthase alpha subunit	Chr03	12324396	12328695	63.9979	-2.92017	0.617382	-4.81744	1.45412e-06	1.36738e-05
itf03g14960	Nucleotide-diphospho-sugar transferases superfamily protein	Chr03	12366905	12369366	45.3939	3.44845	0.571775	5.96276	2.48018e-09	5.86792e-08
itf03g15070	Laccase/Diphenol oxidase family protein	Chr03	12438119	12441271	36.6593	2.2815	0.662656	3.60336	0.000314134	0.00138147
itf03g15140	proline transporter	Chr03	12464614	12468188	79.3216	-2.14472	0.365065	-5.86353	4.53136e-09	9.9016e-08
itf03g15210	UDP-glucosyl transferase 85A2	Chr03	12516406	12518634	27.0975	-2.29738	0.345345	-6.51916	7.07034e-11	2.74219e-09
itf03g15220	UDP-glucosyl transferase 85A5	Chr03	12519396	12519912	81.3182	-3.12638	0.301154	-10.2288	1.47356e-24	2.61243e-21
itf03g15230	UDP-glucosyl transferase 85A2	Chr03	12521086	12525672	212.638	-2.2336	0.1868	-11.9403	7.29555e-33	9.70053e-29
itf03g15240	UDP-glucosyl transferase 85A2	Chr03	12526763	12529227	45.5544	-3.32222	0.466352	-6.85721	7.02171e-12	3.83426e-10
itf03g15350	Exostosin family protein	Chr03	12587993	12589329	85.1243	-3.4397	0.536693	-6.29301	3.11376e-10	9.79931e-09
itf03g15380	conserved hypothetical protein	Chr03	12604710	12606382	11.933	2.49443	0.579558	4.21088	2.54383e-05	0.000160228
itf03g15460	zinc-finger protein	Chr03	12646539	12647160	5.3337	-2.24744	0.60114	-3.47773	0.000505681	0.00208095
itf03g15550	glycerol-3-phosphate acyltransferase	Chr03	12692159	12694075	70.9603	-4.02455	0.67539	-5.90891	3.44368e-09	7.81381e-08
itf03g15620	expansin A6	Chr03	12753222	12754801	171.973	2.44008	0.415231	5.87369	4.26202e-09	9.39799e-08
itf03g15770	Heavy metal transport/detoxification superfamily protein	Chr03	12843975	12844813	48.5069	-2.71291	0.611328	-4.46303	8.08106e-06	6.00446e-05
itf03g15930	nodulin MtN21 /EamA-like transporter family protein	Chr03	12939780	12940086	15.5078	-2.00121	0.743199	-3.07245	0.00212311	0.00703111
itf03g15940	nodulin MtN21 /EamA-like transporter family protein	Chr03	12940173	12942405	87.111	-2.53206	0.707208	-3.98097	6.86356e-05	0.000378128
itf03g15990	cytochrome P450, family 89, subfamily A, polypeptide	Chr03	12962082	12965720	380.148	-2.45442	0.441188	-5.58538	2.33186e-08	3.90007e-07
itf03g16060	Plant protein 1589 of unknown function (A_thal_3526) domain containing protein	Chr03	12998484	13002615	133.703	2.22274	0.393251	5.62918	1.81072e-08	3.14928e-07
itf03g16100	alpha/beta-Hydrolases superfamily protein	Chr03	13021646	13024012	421.081	-2.87373	0.577205	-5.05704	4.25805e-07	4.70437e-06
itf03g16320	PAR1 protein	Chr03	13169653	13170633	85.4211	-2.09039	0.609233	-3.45836	0.000543476	0.00221463
itf03g16680	AT-hook motif nuclear-localized protein	Chr03	13400391	13401237	208.516	-2.26165	0.330951	-6.83158	8.39847e-12	4.44902e-10
itf03g16760	F-box family protein	Chr03	13437727	13438159	48.0571	-2.86718	0.506932	-5.59254	2.23769e-08	3.77343e-07
itf03g16770	F-box family protein	Chr03	13438206	13438893	61.5218	-2.9652	0.512264	-5.73753	9.60694e-09	1.8648e-07
itf03g17070	GDSL-like Lipase/Acylhydrolase superfamily protein	Chr03	13565360	13568065	30.0939	2.15217	0.488935	4.37759	1.19999e-05	8.41985e-05
itf03g17120	Peroxidase superfamily protein	Chr03	13595219	13596910	8.30692	-2.50441	0.78286	-3.14139	0.0016815	0.00578466
itf03g17230	conserved hypothetical protein	Chr03	13681746	13684208	222.271	-3.61129	0.38176	-9.42939	4.12484e-21	3.42787e-18
itf03g17460	cytochrome P450, family 72, subfamily A, polypeptide	Chr03	13839792	13841166	31.7316	-2.41139	0.64694	-3.70346	0.000212682	0.000991937
itf03g17470	cytochrome P450, family 72, subfamily A, polypeptide	Chr03	13841392	13842835	76.6952	-2.65602	0.589062	-4.49895	6.82905e-06	5.18871e-05
itf03g18270	myo-inositol oxygenase	Chr03	14430076	14433070	3879.97	-2.04031	0.404624	-5.0496	4.42726e-07	4.8731e-06
itf03g18310	phosphofructokinase	Chr03	14457450	14460791	2401.79	-2.14209	0.348492	-6.15178	7.66163e-10	2.14019e-08
itf03g18340	Leucine-rich repeat (LRR) family protein	Chr03	14492820	14494481	32.3188	4.06957	0.721806	5.31416	1.0715e-07	1.44789e-06
itf03g18430	Protein kinase family protein with leucine-rich repeat domain	Chr03	14546562	14550240	5.80051	-2.97943	0.731195	-4.18813	2.81268e-05	0.000175252
itf03g18550	Integrase-type DNA-binding superfamily protein	Chr03	14637504	14638640	210.232	-2.94623	0.519412	-5.68678	1.29457e-08	2.40241e-07
itf03g18560	alpha/beta-Hydrolases superfamily protein	Chr03	14642057	14645772	78.4733	-2.37535	0.372717	-6.35025	2.14962e-10	7.16351e-09
itf03g18680	Transducin/WD40 repeat-like superfamily protein	Chr03	14754251	14758657	13.8311	-2.34	0.647188	-4.015	5.94447e-05	0.000334351
itf03g18690	RHO-related protein from plants	Chr03	14766429	14766949	9.05692	2.48235	0.507411	4.60985	4.02968e-06	3.29984e-05
itf03g18790	ABL interactor-like protein	Chr03	14809490	14811910	158.026	4.54291	0.622607	7.20029	6.00864e-13	4.56536e-11
itf03g18910	conserved hypothetical protein	Chr03	14891267	14892100	70.3331	2.98989	0.40214	7.38429	1.53265e-13	1.40544e-11
itf03g19010	serine-rich protein-related	Chr03	14961226	14961860	167.343	-2.3362	0.391862	-5.97764	2.26393e-09	5.45827e-08
itf03g19070	conserved hypothetical protein	Chr03	14987238	14987902	115.66	-3.02553	0.369835	-8.11641	4.80173e-16	8.92954e-14
itf03g19410	Stabilizer of iron transporter SufD / Polynucleotidyl transferase	Chr03	15208987	15214858	149.414	2.14419	0.401027	5.35652	8.4842e-08	1.18623e-06
itf03g19610	O-Glycosyl hydrolases family 17 protein	Chr03	15397556	15399344	4.98025	-2.33385	0.645071	-3.32813	0.000874305	0.00331388
itf03g19900	early nodulin-related	Chr03	15640529	15647585	9.29654	-2.40158	0.804751	-3.12719	0.00176485	0.00601855
itf03g20390	Embryo-specific protein 3, (ATS3)	Chr03	16007710	16009731	6.25587	2.1715	0.566249	3.71161	0.000205944	0.000965182
itf03g20400	Embryo-specific protein 3, (ATS3)	Chr03	16012271	16013733	46.531	2.29658	0.495728	4.62083	3.82206e-06	3.1487e-05
itf03g20440	SPX domain gene	Chr03	16038280	16041420	149.188	-2.8963	0.602651	-4.75501	1.98433e-06	1.78455e-05
itf03g20650	conserved hypothetical protein	Chr03	16280938	16282337	60.9691	-3.03785	0.472582	-6.36802	1.91483e-10	6.51998e-09
itf03g21030	oxophytodienoate-reductase	Chr03	16663136	16665642	82.3238	-3.09663	0.711158	-4.44315	8.86506e-06	6.52708e-05
itf03g21040	spermidine hydroxycinnamoyl transferase	Chr03	16672511	16677715	31.6322	4.39191	0.740212	5.50874	3.61412e-08	5.71405e-07
itf03g21060	Bifunctional inhibitor/lipid-transfer protein/seed storage 2S albumin superfamily protein	Chr03	16681725	16683984	350.04	4.91492	0.708989	7.28179	3.29418e-13	2.67896e-11
itf03g21710	NB-ARC domain-containing disease resistance protein	Chr03	17283430	17285880	54.5801	-2.10279	0.45997	-4.56185	5.07052e-06	4.01858e-05
itf03g21750	NB-ARC domain-containing disease resistance protein	Chr03	17319726	17322585	28.7854	-2.14739	0.531454	-4.01705	5.89303e-05	0.000331949
itf03g21770	NB-ARC domain-containing disease resistance protein	Chr03	17328267	17331087	2.66738	-2.36962	0.744064	-3.27177	0.00106875	0.00393755
itf03g21820	Endomembrane protein 70 protein family	Chr03	17352300	17355150	474.639	2.76786	0.448055	6.18416	6.24322e-10	1.78139e-08
itf03g21910	H(+)-ATPase	Chr03	17434260	17440153	10.6485	-3.53533	0.528025	-5.90295	3.57049e-09	8.05913e-08
itf03g21980	Glycosyl hydrolase family protein with chitinase insertion domain	Chr03	17477302	17479304	207.668	-2.41411	0.485396	-5.03675	4.73513e-07	5.16494e-06
itf03g22190	temperature-induced lipocalin	Chr03	17608216	17610578	3254.13	2.46454	0.383313	6.40813	1.47315e-10	5.23736e-09
itf03g22680	subtilisin-like serine protease	Chr03	18241130	18250306	1796.08	2.0126	0.311305	6.46498	1.01313e-10	3.75763e-09
itf03g22790	Galactosyltransferase family protein	Chr03	18356704	18357658	2.29473	-2.76132	0.80258	-3.21451	0.00130669	0.00468438
itf03g23090	Thioredoxin z	Chr03	18598156	18601662	74.5371	2.03831	0.285594	7.12306	1.05554e-12	7.37212e-11
itf03g23280	plant intracellular ras group-related LRR	Chr03	18834204	18837249	4.36832	-2.59035	0.726581	-3.20665	0.00134292	0.00479166
itf03g23640	Leucine-rich receptor-like protein kinase family protein	Chr03	19227345	19230357	149.332	-4.04665	0.680493	-6.04967	1.45139e-09	3.72196e-08
itf03g23790	Photosystem II reaction center PsbP family protein	Chr03	19423701	19426604	39.7341	2.10754	0.375748	5.58226	2.37416e-08	3.96393e-07
itf03g23810	hydroxycinnamoyl-CoA shikimate/quinate hydroxycinnamoyl transferase	Chr03	19452735	19457018	431.345	-2.23885	0.580184	-3.92529	8.66243e-05	0.000461551
itf03g23900	C2H2-like zinc finger protein	Chr03	19556091	19558045	23.208	2.86923	0.44311	6.34704	2.19497e-10	7.28756e-09
itf03g23980	Polynucleotidyl transferase, ribonuclease H-like superfamily protein	Chr03	19601388	19601697	1.73566	2.39405	0.689963	3.00434	0.00266159	0.00850512
itf03g24270	C2H2-like zinc finger protein	Chr03	19871006	19874522	14.7721	3.1412	0.602163	4.99335	5.93408e-07	6.25962e-06
itf03g24570	CBS domain-containing protein with a domain of unknown function (DUF21)	Chr03	20196129	20201162	150.541	-3.51737	0.714479	-5.38048	7.42868e-08	1.05925e-06
itf03g24660	cyclin-dependent kinase B2;2	Chr03	20294747	20295896	19.1841	2.29933	0.463858	4.89016	1.00752e-06	9.89035e-06
itf03g24780	multidrug resistance-associated protein	Chr03	20503416	20508475	359.605	-2.46098	0.456911	-5.40633	6.43277e-08	9.36838e-07
itf03g24930	Protein kinase superfamily protein	Chr03	20662300	20665774	4.51049	-2.1329	0.618039	-3.15119	0.00162606	0.00562093
itf03g24980	UbiA prenyltransferase family protein	Chr03	20723267	20728056	32.967	2.71762	0.43466	6.19389	5.86956e-10	1.68928e-08
itf03g25180	Calcium-binding EF-hand family protein	Chr03	21011510	21015914	71.3401	-2.23803	0.540151	-4.16487	3.11531e-05	0.000191905
itf03g25270	CCT motif family protein	Chr03	21190309	21194665	438.305	2.40669	0.277908	8.65614	4.88025e-18	1.56362e-15
itf03g25520	Haloacid dehalogenase-like hydrolase (HAD) superfamily protein	Chr03	21448906	21450697	72.9592	-3.33554	0.698309	-4.85944	1.17717e-06	1.13545e-05
itf03g25590	hypothetical protein	Chr03	21524844	21526583	3.25005	2.16653	0.639	3.14622	0.00165396	0.00570403
itf03g25780	homeobox	Chr03	21735641	21736847	319.943	-2.19446	0.464633	-4.71041	2.4722e-06	2.15764e-05
itf03g26120	Polyketide cyclase/dehydrase and lipid transport superfamily protein	Chr03	22168672	22172092	346.294	3.27115	0.350017	9.32452	1.11487e-20	8.47075e-18
itf03g26260	hypothetical protein	Chr03	22336786	22337649	243.776	2.93239	0.719647	4.03797	5.39149e-05	0.000307344
itf03g26460	response to low sulfur	Chr03	22533485	22533830	58.547	2.32462	0.469391	4.94034	7.79871e-07	7.96127e-06
itf03g27140	Aluminium activated malate transporter family protein	Chr03	23385547	23388343	6.05237	3.42348	0.770357	4.40372	1.06409e-05	7.61298e-05
itf03g27440	RNA-binding (RRM/RBD/RNP motifs) family protein	Chr03	23840996	23842970	4.7418	2.27038	0.705981	3.59023	0.000330386	0.0014434
itf03g28440	S-locus lectin protein kinase family protein	Chr03	25185534	25188150	1056.13	-2.21225	0.435668	-5.09432	3.5e-07	3.97589e-06
itf03g28790	cytochrome P450, family 96, subfamily A, polypeptide	Chr03	25715003	25717026	143.566	-4.36001	0.664439	-6.5615	5.32707e-11	2.19292e-09
itf03g29420	cytochrome P450, family 71, subfamily B, polypeptide	Chr03	26420149	26425083	46.8941	-3.84035	0.751186	-5.26206	1.42451e-07	1.83536e-06
itf03g29430	cytochrome P450, family 71, subfamily B, polypeptide	Chr03	26444043	26445850	69.6516	2.58711	0.547912	4.72883	2.25817e-06	1.99663e-05
[truncated: 1,732 more rows]

## Sheet: T_30DAT_SR_vs_T_30DAT_FR
Gene	Functional Annotation	Chr	Start	Stop	baseMean	log2FoldChange	lfcSE	stat	pvalue	padj	Trait	QTL_in_Trait_Order
[truncated: 345 more rows]

[truncated: 1 more sheets: T_50DAT_SR_vs_T_50DAT_FR]
